# Supplementary material for: Immune, RNA, and Neurocognitive Genetic Networks in Bipolar Disorder Subtypes: A Transcriptomic Meta-Analysis
Source: Research Square preprint supplement (doi:10.21203/rs.3.rs-3508951/v1), 2024-01-17
Supplement: Supplementary file 2 [file 764bc5dd5dcfd5579d5a392e.xlsx]

## Sheet: p value < 0.05 and LogFC >|0.5|
Arion_Neurons_Bipolar_Type_1_vs_Control				Arion_Neurons_Bipolar_Type_1_vs_Control_HUB_GENES				Arion_D_DEGs_Neurons_Bipolar_Type_1_vs_Control				Arion_D_DEGs_Neurons_Bipolar_Type_1_vs_Control_HUB_GENES				Arion_U_DEGs_Neurons_Bipolar_Type_1_vs_Control				Arion_U_DEGs_Neurons_Bipolar_Type_1_vs_Control_HUB_GENES				Arion_Neurons_Bipolar_NOS_vs_Control				Arion_Neurons_Bipolar_NOS_vs_Control_HUB_GENES				Arion_D_DEGs_Neurons_Bipolar_NOS_vs_Control				Arion_D_DEGs_Neurons_Bipolar_NOS_vs_Control_HUB_GENES				Arion_U_DEGs_Neurons_Bipolar_NOS_vs_Control				Arion_U_DEGs_Neurons_Bipolar_NOS_vs_Control_HUB_GENES				Bahn_Postmortem_Cortex_Bipolar_vs_Control
GO TERM	Category	Strength	Adjusted P Value	GO TERM	Category	Strength	Adjusted P Value	GO TERM	Category	Strength	Adjusted P Value	GO TERM	Category	Strength	Adjusted P Value	GO TERM	Category	Strength	Adjusted P Value	GO TERM	Category	Strength	Adjusted P Value	GO TERM	Category	Strength	Adjusted P Value	GO TERM	Category	Strength	Adjusted P Value	GO TERM	Category	Strength	Adjusted P Value	GO TERM	Category	Strength	Adjusted P Value	GO TERM	Category	Strength	Adjusted P Value	GO TERM	Category	Strength	Adjusted P Value	GO TERM	Category
Binding	Molecular Function	0.07	0.039	Nucleologenesis	Biological Process	3.29	0.001	Membrane-bounded organelle	Cellular Component	0.08	0.0333	rRNA pseudouridine synthesis	Biological Process	2.69	0.0085	None								Regulation of rna splicing	Biological Process	0.42	0.0136	Endonucleolytic cleavage to generate mature 5-end of ssu-rrna from (ssu-rrna, 5.8s rrna, lsu-rrna)	Biological Process	2.99	0.0042	mRNA splicing, via spliceosome	Biological Process	0.55	0.00078	Maturation of lsu-rrna from tricistronic rrna transcript (ssu-rrna, 5.8s rrna, lsu-rrna)	Biological Process	2.42	0.0409	Cellular macromolecule biosynthetic process	Biological Process	0.22	0.00031	Endonucleolytic cleavage to generate mature 5-end of ssu-rrna from (ssu-rrna, 5.8s rrna, lsu-rrna)	Biological Process	2.99	0.0045	Positive regulation of corticosterone secretion	Biological Process
Preribosome	Cellular Component	0.77	0.0364	rRNA pseudouridine synthesis	Biological Process	2.69	0.0056	Intracellular organelle	Cellular Component	0.08	0.0333	Endonucleolytic cleavage in its1 to separate ssu-rrna from 5.8s rrna and lsu-rrna from tricistronic rrna transcript (ssu-rrna, 5.8s rrna, lsu-rrna)	Biological Process	2.64	0.0097									Glycerophospholipid biosynthetic process	Biological Process	0.34	0.0468	Endonucleolytic cleavage in 5-ets of tricistronic rrna transcript (ssu-rrna, 5.8s rrna, lsu-rrna)	Biological Process	2.75	0.0077	RNA splicing	Biological Process	0.53	8.92e-05	rRNA processing	Biological Process	1.57	0.0164	Macromolecule biosynthetic process	Biological Process	0.22	0.00067	Endonucleolytic cleavage in 5-ets of tricistronic rrna transcript (ssu-rrna, 5.8s rrna, lsu-rrna)	Biological Process	2.75	0.009	Hormone-mediated apoptotic signaling pathway	Biological Process
Nucleoplasm	Cellular Component	0.19	0.0037	Endonucleolytic cleavage in its1 to separate ssu-rrna from 5.8s rrna and lsu-rrna from tricistronic rrna transcript (ssu-rrna, 5.8s rrna, lsu-rrna)	Biological Process	2.64	0.0066	Intracellular	Cellular Component	0.07	0.0312	Ribosomal subunit export from nucleus	Biological Process	2.48	0.0158									RNA splicing	Biological Process	0.32	0.0011	Maturation of lsu-rrna from tricistronic rrna transcript (ssu-rrna, 5.8s rrna, lsu-rrna)	Biological Process	2.42	0.024	mRNA processing	Biological Process	0.51	6.08e-05	ncRNA metabolic process	Biological Process	1.32	0.0164	Gene expression	Biological Process	0.2	0.00019	rRNA processing	Biological Process	1.81	9.95e-09	Glutamate secretion	Biological Process
Protein-containing complex	Cellular Component	0.14	0.0294	Ribosomal subunit export from nucleus	Biological Process	2.48	0.0113	Organelle	Cellular Component	0.07	0.0312	Maturation of 5.8s rrna from tricistronic rrna transcript (ssu-rrna, 5.8s rrna, lsu-rrna)	Biological Process	2.41	0.00032									RNA splicing, via transesterification reactions	Biological Process	0.32	0.0133	Maturation of 5.8s rrna	Biological Process	2.24	0.0012	mRNA metabolic process	Biological Process	0.42	0.00021	RNA processing	Biological Process	1.14	0.0164	Cellular biosynthetic process	Biological Process	0.19	0.00019	Ribosome biogenesis	Biological Process	1.78	5.41e-12	Organelle transport along microtubule	Biological Process
Nuclear lumen	Cellular Component	0.14	0.0328	Maturation of 5.8s rrna from tricistronic rrna transcript (ssu-rrna, 5.8s rrna, lsu-rrna)	Biological Process	2.41	0.00027					rRNA modification	Biological Process	2.35	7.19e-06									mRNA splicing, via spliceosome	Biological Process	0.32	0.0209	Maturation of 5.8s rrna from tricistronic rrna transcript (ssu-rrna, 5.8s rrna, lsu-rrna)	Biological Process	2.23	0.0409	RNA processing	Biological Process	0.39	8.92e-05	RNA metabolic process	Biological Process	0.94	0.0164	Intracellular transport	Biological Process	0.19	0.0248	RNA binding	Molecular Function	0.98	0.00032	Localization within membrane	Biological Process
Intracellular organelle lumen	Cellular Component	0.13	0.0294	rRNA modification	Biological Process	2.35	5.14e-06					Cleavage involved in rrna processing	Biological Process	2.35	0.00041									mRNA processing	Biological Process	0.31	0.00042	Ribosomal large subunit biogenesis	Biological Process	1.91	0.0063	RNA metabolic process	Biological Process	0.25	0.0042	Gene expression	Biological Process	0.82	0.0236	Biosynthetic process	Biological Process	0.18	0.00019	Small-subunit processome	Cellular Component	2.49	1.6e-11	Transport along microtubule	Biological Process
Nucleus	Cellular Component	0.1	0.0452	Cleavage involved in rrna processing	Biological Process	2.35	0.00034					Telomere maintenance via telomerase	Biological Process	2.25	0.0304									RNA processing	Biological Process	0.27	1.61e-05	rRNA processing	Biological Process	1.81	1.44e-08	Nucleic acid metabolic process	Biological Process	0.24	0.00084	RNA helicase activity	Molecular Function	1.9	0.0043	Organic substance biosynthetic process	Biological Process	0.18	0.00019	90S preribosome	Cellular Component	2.34	0.00013	Adult behavior	Biological Process
Intracellular membrane-bounded organelle	Cellular Component	0.09	0.0037	Telomere maintenance via telomerase	Biological Process	2.25	0.0242					rRNA methylation	Biological Process	2.19	0.0351									mRNA metabolic process	Biological Process	0.25	0.0023	Ribosome biogenesis	Biological Process	1.73	1.56e-09	Cellular aromatic compound metabolic process	Biological Process	0.2	0.0025	Catalytic activity, acting on rna	Molecular Function	1.5	1.66e-05	RNA metabolic process	Biological Process	0.18	0.0248	Preribosome	Cellular Component	2.24	4.56e-12	Positive regulation of synaptic transmission	Biological Process
Membrane-bounded organelle	Cellular Component	0.08	0.0037	rRNA methylation	Biological Process	2.19	0.0292					Maturation of lsu-rrna	Biological Process	2.15	0.0407									RNA metabolic process	Biological Process	0.21	3.83e-06	RNA binding	Molecular Function	1.03	6.58e-06	Heterocycle metabolic process	Biological Process	0.2	0.0025	RNA binding	Molecular Function	1.07	6.03e-08	Nucleic acid metabolic process	Biological Process	0.17	0.0078	Nucleolus	Cellular Component	1.28	6.63e-09	Chemical synaptic transmission	Biological Process
Intracellular organelle	Cellular Component	0.08	0.0037	Maturation of lsu-rrna	Biological Process	2.15	0.0342					Ribosomal small subunit biogenesis	Biological Process	2.05	6.1e-05									Gene expression	Biological Process	0.2	5.46e-07	Preribosome, small subunit precursor	Cellular Component	2.45	0.0037	Nucleobase-containing compound metabolic process	Biological Process	0.19	0.0074	Purine ribonucleoside triphosphate binding	Molecular Function	0.88	0.0043	Cellular nitrogen compound metabolic process	Biological Process	0.16	0.00031	Nucleoplasm	Cellular Component	0.6	0.0166	Synaptic signaling	Biological Process
Cytoplasm	Cellular Component	0.07	0.0294	Ribosomal small subunit biogenesis	Biological Process	2.05	5.54e-05					Ribosomal large subunit biogenesis	Biological Process	1.91	0.0054									Nucleic acid metabolic process	Biological Process	0.19	2.94e-07	90S preribosome	Cellular Component	2.34	0.00014	Organic cyclic compound metabolic process	Biological Process	0.18	0.0042	Purine ribonucleotide binding	Molecular Function	0.87	0.0043	Cellular aromatic compound metabolic process	Biological Process	0.15	0.0029					Locomotory behavior	Biological Process
Intracellular	Cellular Component	0.06	0.0037	Ribosomal large subunit biogenesis	Biological Process	1.91	0.0041					rRNA processing	Biological Process	1.74	1.71e-06									Cellular aromatic compound metabolic process	Biological Process	0.17	2.69e-07	Small-subunit processome	Cellular Component	2.31	2.16e-06	Cellular nitrogen compound metabolic process	Biological Process	0.17	0.0074	Spliceosomal complex	Cellular Component	1.49	0.0498	Heterocycle metabolic process	Biological Process	0.15	0.0042					Behavior	Biological Process
Organelle	Cellular Component	0.06	0.0046	rRNA processing	Biological Process	1.81	1.44e-08					Ribosome biogenesis	Biological Process	1.67	2.68e-07									Heterocycle metabolic process	Biological Process	0.17	3.17e-07	Preribosome	Cellular Component	2.1	2.55e-07	Cellular metabolic process	Biological Process	0.11	0.0025	Ribonucleoprotein complex	Cellular Component	1.16	0.0094	Cellular component biogenesis	Biological Process	0.15	0.0098					Organelle localization	Biological Process
				Ribosome biogenesis	Biological Process	1.73	1.56e-09					RNA processing	Biological Process	1.21	6.1e-05									Cellular macromolecule biosynthetic process	Biological Process	0.17	0.0012	Nucleolus	Cellular Component	1.33	9.92e-11	Cellular process	Biological Process	0.05	0.0038	Nucleolus	Cellular Component	1.1	0.0034	Nucleobase-containing compound metabolic process	Biological Process	0.15	0.0113					Cellular response to organonitrogen compound	Biological Process
				RNA metabolic process	Biological Process	0.99	9.38e-05					Box h/aca snorna binding	Molecular Function	2.89	0.0095									Cellular nitrogen compound metabolic process	Biological Process	0.16	1.74e-07	Ribonucleoprotein complex	Cellular Component	1.24	0.00014	ATPase binding	Molecular Function	0.73	0.0077	Nucleoplasm	Cellular Component	0.6	0.0498	Cellular component assembly	Biological Process	0.15	0.0367					Cell-cell signaling	Biological Process
				Gene expression	Biological Process	0.88	0.00051					RNA binding	Molecular Function	0.92	0.0095									Nucleobase-containing compound metabolic process	Biological Process	0.16	2.76e-06	Nucleoplasm	Cellular Component	0.65	0.00091	mRNA binding	Molecular Function	0.45	0.0346					Cellular macromolecule metabolic process	Biological Process	0.13	0.00019					Response to organonitrogen compound	Biological Process
				Cellular component biogenesis	Biological Process	0.83	0.00013					Box h/aca scarnp complex	Cellular Component	2.99	0.0015									Cellular biosynthetic process	Biological Process	0.16	1.97e-05					RNA binding	Molecular Function	0.31	5.48e-06					Organic cyclic compound metabolic process	Biological Process	0.13	0.0137					Response to organic cyclic compound	Biological Process
				Box h/aca snorna binding	Molecular Function	2.89	0.0095					Box h/aca telomerase rnp complex	Cellular Component	2.99	0.0015									Macromolecule biosynthetic process	Biological Process	0.16	0.0023					Nucleic acid binding	Molecular Function	0.18	5.27e-05					Cellular metabolic process	Biological Process	0.11	3.6e-05					Nervous system process	Biological Process
				RNA binding	Molecular Function	0.92	0.0095					Box h/aca snornp complex	Cellular Component	2.89	0.0015									Intracellular transport	Biological Process	0.16	0.0127					Anion binding	Molecular Function	0.16	0.0392					Nitrogen compound metabolic process	Biological Process	0.11	0.00019					System process	Biological Process
				Box h/aca scarnp complex	Cellular Component	2.99	0.0012					Preribosome, small subunit precursor	Cellular Component	2.45	0.006									Organic cyclic compound metabolic process	Biological Process	0.15	2.24e-06					Organic cyclic compound binding	Molecular Function	0.15	5.27e-05					Macromolecule metabolic process	Biological Process	0.11	0.00019					Protein localization	Biological Process
				Box h/aca telomerase rnp complex	Cellular Component	2.99	0.0012					Preribosome, large subunit precursor	Cellular Component	2.21	0.0129									Organic substance biosynthetic process	Biological Process	0.15	1.97e-05					Heterocyclic compound binding	Molecular Function	0.15	5.27e-05					Cellular component organization or biogenesis	Biological Process	0.11	0.00094					Nervous system development	Biological Process
				Box h/aca snornp complex	Cellular Component	2.89	0.0012					Preribosome	Cellular Component	2.1	2.55e-07									Biosynthetic process	Biological Process	0.15	3.77e-05					Protein binding	Molecular Function	0.12	0.00044					Organic substance metabolic process	Biological Process	0.1	5.86e-05					Cellular component assembly	Biological Process
				Preribosome, small subunit precursor	Cellular Component	2.45	0.0043					Small-subunit processome	Cellular Component	2.01	0.0237									Cellular nitrogen compound biosynthetic process	Biological Process	0.15	0.0242					Binding	Molecular Function	0.08	5.48e-06					Primary metabolic process	Biological Process	0.1	0.00019					Regulation of biological quality	Biological Process
				Preribosome, large subunit precursor	Cellular Component	2.21	0.0092					Ribonucleoprotein complex	Cellular Component	1.36	1.55e-07									Cell cycle	Biological Process	0.15	0.0405					Spliceosomal complex	Cellular Component	0.58	0.00057					Cellular component organization	Biological Process	0.1	0.0037					Transport	Biological Process
				Small-subunit processome	Cellular Component	2.19	0.00043					Nucleolus	Cellular Component	1.1	0.0011									Cellular component biogenesis	Biological Process	0.14	0.00036					Nuclear speck	Cellular Component	0.45	0.00051					Metabolic process	Biological Process	0.09	0.00019					Signaling	Biological Process
				Preribosome	Cellular Component	2.18	1.83e-09					Nucleoplasm	Cellular Component	0.6	0.0129									Protein localization	Biological Process	0.14	0.0049					Nuclear body	Cellular Component	0.36	0.00013					Ribonucleoprotein complex	Cellular Component	0.24	0.0421					Localization	Biological Process
				Ribonucleoprotein complex	Cellular Component	1.36	7.76e-08																	Cellular protein localization	Biological Process	0.14	0.0386					Ribonucleoprotein complex	Cellular Component	0.32	0.0066					Bounding membrane of organelle	Cellular Component	0.15	0.0148					Inhibitory extracellular ligand-gated ion channel activity	Molecular Function
				Nucleolus	Cellular Component	1.23	6e-07																	Cellular localization	Biological Process	0.13	0.00054					Centrosome	Cellular Component	0.31	0.0369					Nucleoplasm	Cellular Component	0.13	0.0002					Ligand-gated anion channel activity	Molecular Function
				Nucleoplasm	Cellular Component	0.65	0.0012																	Cellular component assembly	Biological Process	0.13	0.0046					Nucleolus	Cellular Component	0.3	0.0019					Cytosol	Cellular Component	0.11	0.00071					Glycinergic synapse	Cellular Component
				Protein-containing complex	Cellular Component	0.54	0.0058																	Establishment of localization in cell	Biological Process	0.13	0.0115					Nucleoplasm	Cellular Component	0.23	3.63e-09					Organelle membrane	Cellular Component	0.11	0.0148					Clathrin-sculpted gamma-aminobutyric acid transport vesicle membrane	Cellular Component
																								Cellular metabolic process	Biological Process	0.11	1.16e-09					Nuclear lumen	Cellular Component	0.19	3.79e-08					Nucleus	Cellular Component	0.1	6.26e-06					cAMP-dependent protein kinase complex	Cellular Component
																								Cellular macromolecule metabolic process	Biological Process	0.11	4.64e-06					Intracellular organelle lumen	Cellular Component	0.17	1.3e-08					Nuclear lumen	Cellular Component	0.1	0.0045					GABA-A receptor complex	Cellular Component
																								Organelle organization	Biological Process	0.11	0.0012					Protein-containing complex	Cellular Component	0.15	6.96e-05					Intracellular membrane-bounded organelle	Cellular Component	0.09	1.89e-10					Chloride channel complex	Cellular Component
																								Macromolecule localization	Biological Process	0.11	0.0405					Non-membrane-bounded organelle	Cellular Component	0.15	0.00012					Intracellular organelle lumen	Cellular Component	0.09	0.0024					GABA-ergic synapse	Cellular Component
																								Organic substance metabolic process	Biological Process	0.1	6e-08					Intracellular non-membrane-bounded organelle	Cellular Component	0.15	0.00015					Intracellular organelle	Cellular Component	0.08	1.61e-11					Neuron projection membrane	Cellular Component
																								Nitrogen compound metabolic process	Biological Process	0.1	2.3e-07					Nucleus	Cellular Component	0.13	2.11e-06					Intracellular	Cellular Component	0.07	2.2e-13					Synaptic membrane	Cellular Component
																								Primary metabolic process	Biological Process	0.1	2.43e-07					Cytosol	Cellular Component	0.13	0.0019					Organelle	Cellular Component	0.07	1.16e-09					Postsynaptic membrane	Cellular Component
																								Macromolecule metabolic process	Biological Process	0.1	1.45e-06					Intracellular membrane-bounded organelle	Cellular Component	0.1	7.19e-07					Membrane-bounded organelle	Cellular Component	0.07	1.55e-09					Transport vesicle	Cellular Component
																								Cellular component organization or biogenesis	Biological Process	0.1	6.63e-06					Intracellular organelle	Cellular Component	0.09	7.39e-09					Cytoplasm	Cellular Component	0.06	3.75e-05					Synapse	Cellular Component
																								Cellular component organization	Biological Process	0.1	8.02e-05					Membrane-bounded organelle	Cellular Component	0.09	1.45e-08					Cellular anatomical entity	Cellular Component	0.02	0.011					Postsynapse	Cellular Component
																								Metabolic process	Biological Process	0.09	2.3e-07					Intracellular	Cellular Component	0.08	1e-09													Axon	Cellular Component
																								Establishment of localization	Biological Process	0.09	0.0149					Organelle	Cellular Component	0.08	7.2e-09													Cytoplasmic vesicle membrane	Cellular Component
																								Regulation of cellular metabolic process	Biological Process	0.08	0.0021					Cytoplasm	Cellular Component	0.08	6.19e-05													Perinuclear region of cytoplasm	Cellular Component
																								Localization	Biological Process	0.08	0.006					Cellular anatomical entity	Cellular Component	0.02	0.0019													Neuron projection	Cellular Component
																								Transport	Biological Process	0.08	0.0405																					Plasma membrane region	Cellular Component
																								Regulation of metabolic process	Biological Process	0.07	0.0064																					Somatodendritic compartment	Cellular Component
																								Regulation of macromolecule metabolic process	Biological Process	0.07	0.0064																					Membrane protein complex	Cellular Component
																								Regulation of nitrogen compound metabolic process	Biological Process	0.07	0.0209																					Plasma membrane bounded cell projection	Cellular Component
																								Regulation of primary metabolic process	Biological Process	0.07	0.0242																					Extracellular space	Cellular Component
																								Cellular process	Biological Process	0.03	5.94e-05																					Vesicle	Cellular Component
																								RNA binding	Molecular Function	0.2	2.32e-05																					Cytosol	Cellular Component
																								Nucleic acid binding	Molecular Function	0.12	0.00017																					Cell periphery	Cellular Component
																								Heterocyclic compound binding	Molecular Function	0.09	0.00022																					Plasma membrane	Cellular Component
																								Organic cyclic compound binding	Molecular Function	0.09	0.00042																					Cytoplasm	Cellular Component
																								Binding	Molecular Function	0.05	0.00022
																								Cytoplasmic stress granule	Cellular Component	0.49	0.0272
																								Transcription repressor complex	Cellular Component	0.47	0.0354
																								Spliceosomal complex	Cellular Component	0.35	0.0127
																								Asymmetric synapse	Cellular Component	0.29	0.005
																								Postsynaptic density	Cellular Component	0.28	0.0114
																								Ribonucleoprotein complex	Cellular Component	0.27	5e-05
																								Neuron to neuron synapse	Cellular Component	0.27	0.0093
																								Nuclear speck	Cellular Component	0.25	0.0259
																								Centrosome	Cellular Component	0.23	0.0093
																								Nuclear body	Cellular Component	0.22	0.0014
																								Nucleolus	Cellular Component	0.21	0.00082
																								Microtubule organizing center	Cellular Component	0.2	0.0114
																								Postsynapse	Cellular Component	0.2	0.0222
																								Organelle envelope	Cellular Component	0.18	0.0021
																								Nucleoplasm	Cellular Component	0.17	5.42e-13
																								Synapse	Cellular Component	0.15	0.0124
																								Nuclear lumen	Cellular Component	0.14	3.65e-10
																								Intracellular organelle lumen	Cellular Component	0.13	5.97e-11
																								Golgi apparatus	Cellular Component	0.13	0.0286
																								Nucleus	Cellular Component	0.11	2.65e-12
																								Cytosol	Cellular Component	0.11	1.51e-07
																								Protein-containing complex	Cellular Component	0.11	5.78e-06
																								Intracellular membrane-bounded organelle	Cellular Component	0.09	1.36e-17
																								Non-membrane-bounded organelle	Cellular Component	0.09	0.00046
																								Intracellular non-membrane-bounded organelle	Cellular Component	0.09	0.0011
																								Organelle membrane	Cellular Component	0.09	0.0116
																								Intracellular organelle	Cellular Component	0.08	1.19e-20
																								Membrane-bounded organelle	Cellular Component	0.08	6.01e-18
																								Intracellular	Cellular Component	0.07	6.15e-24
																								Organelle	Cellular Component	0.07	1.09e-18
																								Cytoplasm	Cellular Component	0.07	2.18e-10
																								Cellular anatomical entity	Cellular Component	0.02	3.33e-06
[truncated: 310 more columns]

## Sheet: Summary of Pathways
Dataset	Immune	RNA	Neurocognitive	Metal Ion	ATP
Arion_Neurons_Bipolar_Type_1_vs_Control		1
Arion_Neurons_Bipolar_Type_1_vs_Control_HUB_GENES		1
Arion_D_DEGs_Neurons_Bipolar_Type_1_vs_Control
Arion_D_DEGs_Neurons_Bipolar_Type_1_vs_Control_HUB_GENES		1
Arion_U_DEGs_Neurons_Bipolar_Type_1_vs_Control
Arion_U_DEGs_Neurons_Bipolar_Type_1_vs_Control_HUB_GENES
Arion_Neurons_Bipolar_NOS_vs_Control		1	1
Arion_Neurons_Bipolar_NOS_vs_Control_HUB_GENES		1
Arion_D_DEGs_Neurons_Bipolar_NOS_vs_Control		1			1
Arion_D_DEGs_Neurons_Bipolar_NOS_vs_Control_HUB_GENES		1
Arion_U_DEGs_Neurons_Bipolar_NOS_vs_Control		1
Arion_U_DEGs_Neurons_Bipolar_NOS_vs_Control_HUB_GENES		1
Bahn_Postmortem_Cortex_Bipolar_vs_Control			1	1
Bahn_Postmortem_Cortex_Bipolar_vs_Control_HUB_GENES	1		1
Bahn_D_DEG_Postmortem_Cortex_Bipolar_vs_Control			1	1
Bahn_D_DEG_Postmortem_Cortex_Bipolar_vs_Control_HUB_GENES	1		1
Bahn_U_DEG_Postmortem_Cortex_Bipolar_vs_Control
Bahn_U_DEG_Postmortem_Cortex_Bipolar_vs_Control_HUB_GENES
Bousman_PBMC_Bipolar_vs_Control
Bousman_PBMC_Bipolar_vs_Control_HUB_GENES	1	1
Bousman_D_DEG_PBMC_Bipolar_vs_Control
Bousman_D_DEG_PBMC_Bipolar_vs_Control_HUB_GENES	1
Bousman_U_DEG_PBMC_Bipolar_vs_Control	1	1
Bousman_U_DEG_PBMC_Bipolar_vs_Control_HUB_GENES	1	1
Clelland_Blood_Never_Medicated_Bipolar_Type_1_vs_Control	1	1		1	1
Clelland_Blood_Never_Medicated_Bipolar_Type_1_vs_Control_HUB_GENES		1
Clelland_D_DEG_Blood_Never_Medicated_Bipolar_Type_1_vs_Control	1	1		1	1
Clelland_D_DEG_Blood_Never_Medicated_Bipolar_Type_1_vs_Control_HUB_GENES		1
Clelland_U_DEG_Blood_Never_Medicated_Bipolar_Type_1_vs_Control	1		1
Clelland_U_DEG_Blood_Never_Medicated_Bipolar_Type_1_vs_Control_HUB_GENES	1
Cruceanu_Anterior_Cortex_Bipolar_vs_Control		1	1	1
Cruceanu_Anterior_Cortex_Bipolar_vs_Control_HUB_GENES		1	1
Cruceanu_D_DEG_Anterior_Cortex_Bipolar_vs_Control	1		1	1	1
Cruceanu_D_DEG_Anterior_Cortex_Bipolar_vs_Control_HUB_GENES			1	1
Cruceanu_U_DEG_Anterior_Cortex_Bipolar_vs_Control	1	1	1	1	1
Cruceanu_U_DEG_Anterior_Cortex_Bipolar_vs_Control_HUB_GENES		1
Hilscher_Lymphoblast_Fibroblast_Lithium_Treated_Bipolar_vs_Control	1
Hilscher_Lymphoblast_Fibroblast_Lithium_Treated_Bipolar_vs_Control_HUB_GENES	1
Hilscher_D_DEG_Lymphoblast_Fibroblast_Lithium_Treated_Bipolar_vs_Control
Hilscher_D_DEG_Lymphoblast_Fibroblast_Lithium_Treated_Bipolar_vs_Control_HUB_GENES
Hilscher_U_DEG_Lymphoblast_Fibroblast_Lithium_Treated_Bipolar_vs_Control	1
Hilscher_U_DEG_Lymphoblast_Fibroblast_Lithium_Treated_Bipolar_vs_Control_HUB_GENES	1
Iwamoto_Prefrontal_Cortex_Bipolar_vs_Control	1	1	1	1
Iwamoto_Prefrontal_Cortex_Bipolar_vs_Control_HUB_GENES	1		1		1
Iwamoto_D_DEGs_Prefrontal_Cortex_Bipolar_vs_Control	1		1	1
Iwamoto_D_DEGs_Prefrontal_Cortex_Bipolar_vs_Control_HUB_GENES	1		1	1
Iwamoto_U_DEGs_Prefrontal_Cortex_Bipolar_vs_Control	1	1	1		1
Iwamoto_U_DEGs_Prefrontal_Cortex_Bipolar_vs_Control_HUB_GENES	1		1		1
Kim_Neurons_Bipolar_Type_1_vs_Control_Time_Independent		1		1
Kim_Neurons_Bipolar_Type_1_vs_Control_Time_Independent_HUB_GENES
Kim_D_DEGs_Neurons_Bipolar_Type_1_vs_Control_Time_Independent		1
Kim_D_DEGs_Neurons_Bipolar_Type_1_vs_Control_Time_Independent_HUB_GENES
Kim_U_DEGs_Neurons_Bipolar_Type_1_vs_Control_Time_Independent
Kim_U_DEGs_Neurons_Bipolar_Type_1_vs_Control_Time_Independent_HUB_GENES			1
Logotheti_Skin_Fibroblasts_Bipolar_Type_1_vs_Control
Logotheti_Skin_Fibroblasts_Bipolar_Type_1_vs_Control_HUB_GENES	1			1
Logotheti_D_DEG_Skin_Fibroblasts_Bipolar_Type_1_vs_Control				1
Logotheti_D_DEG_Skin_Fibroblasts_Bipolar_Type_1_vs_Control_HUB_GENES	1	1		1
Logotheti_U_DEG_Skin_Fibroblasts_Bipolar_Type_1_vs_Control
Logotheti_U_DEG_Skin_Fibroblasts_Bipolar_Type_1_vs_Control_HUB_GENES
Matigian_Twin_Lyphocytes_Bipolar_Type_1_vs_Non_Bipolar_Twin	1	1	1	1
Matigian_Twin_Lyphocytes_Bipolar_Type_1_vs_Non_Bipolar_Twin_HUB_GENES	1			1
Matigian_D_DEG_Twin_Lyphocytes_Bipolar_Type_1_vs_Non_Bipolar_Twin	1		1	1
Matigian_D_DEG_Twin_Lyphocytes_Bipolar_Type_1_vs_Non_Bipolar_Twin_HUB_GENES	1
Matigian_U_DEG_Twin_Lyphocytes_Bipolar_Type_1_vs_Non_Bipolar_Twin			1
Matigian_U_DEG_Twin_Lyphocytes_Bipolar_Type_1_vs_Non_Bipolar_Twin_HUB_GENES	1
Savitz_PBMC_Bipolar_vs_Control	1	1	1	1
Savitz_PBMC_Bipolar_vs_Control_HUB_GENES	1	1	1	1
Savitz_D_DEG_PBMC_Bipolar_vs_Control
Savitz_D_DEG_PBMC_Bipolar_vs_Control_HUB_GENES
Savitz_U_DEG_PBMC_Bipolar_vs_Control	1	1	1	1
Savitz_U_DEG_PBMC_Bipolar_vs_Control_HUB_GENES	1	1	1	1
Savitz_PBMC_Bipolar_Type_1_vs_Bipolar_Type_2
Savitz_PBMC_Bipolar_Type_1_vs_Bipolar_Type_2_HUB_GENES	1
Savitz_D_DEG_PBMC_Bipolar_Type_1_vs_Bipolar_Type_2
Savitz_D_DEG_PBMC_Bipolar_Type_1_vs_Bipolar_Type_2_HUB_GENES
Savitz_U_DEG_PBMC_Bipolar_Type_1_vs_Bipolar_Type_2
Savitz_U_DEG_PBMC_Bipolar_Type_1_vs_Bipolar_Type_2_HUB_GENES	1
Vawter_Anterior_Singulate_Bipolar_Type_1_vs_Control	1
Vawter_Anterior_Singulate_Bipolar_Type_1_vs_Control_HUB_GENES	1	1
Vawter_D_DEG_Anterior_Singulate_Bipolar_Type_1_vs_Control	1
Vawter_D_DEG_Anterior_Singulate_Bipolar_Type_1_vs_Control_HUB_GENES	1
Vawter_U_DEG_Anterior_Singulate_Bipolar_Type_1_vs_Control
Vawter_U_DEG_Anterior_Singulate_Bipolar_Type_1_vs_Control_HUB_GENES
Witt_Blood_Bipolar_Type_1_vs_Control		1	1	1
Witt_Blood_Bipolar_Type_1_vs_Control_HUB_GENES					1
Witt_D_DEG_Blood_Bipolar_Type_1_vs_Control		1
Witt_D_DEG_Blood_Bipolar_Type_1_vs_Control_HUB_GENES		1
Witt_U_DEG_Blood_Bipolar_Type_1_vs_Control	1	1	1	1	1
Witt_U_DEG_Blood_Bipolar_Type_1_vs_Control_HUB_GENES	1				1
Total = 90 comparisons	41	35	27	24	11
Datasets = 15	12	12	9	9	5

## Sheet: Condensed Summary of Pathways
Dataset	Immune	RNA	Neurocognitive	Metal Ion	ATP
Arion BD 1 vs Control
Arion BD NOS vs Control
Bahn BD vs Control
Bousman BD vs Control
Clelland BD 1 vs Control
Cruceanu BD vs Control
Hilscher BD vs Control
Iwamoto BD vs Control
Kim BD 1 vs Control
Logotheti BD 1 vs Control
Matigian BD 1 vs Control
Savitz BD vs Control
Savitz BD 1 vs BD 2
Vawter BD 1 vs Control
Witt BD 1 vs Control

## Sheet: Search Terms
Immune	RNA	Neurocognitive	Metal Ion	ATP	Negative Search Term
Immune	Ribo	Glutamate	“ ion”	Mitochon	Response to external stimulus
T-helper	Rna	Neurotransmitter	Calcium	ATP	Cellular response to ionizing radiation
Cytotoxic	Splicosom	Nerve	Zinc	respiration	Receptor internalization
NF-kappaB	Small-subunit processome	GABA	Phosphorous		External side of plasma membrane
Interferon		Axon	Cation binding		Detection of external stimulus
Inflammatory		Synapse	Ligand-gated anion channel activity		Neural crest cell differentiation
Macrophage		Nervous			organophosphorus
Interleukin		Neuron			external encapsulating structure organization (GO:0045229)
T cell		Dopamine
Cytokine		Synaptic
Glial		Brain
Lymphocyte		Behavior
Myeloid		Cognition
Antigen		Dendrite
Leukocyte		Dendritic
Glucocorticoid		Learning
Tumor necrosis factor		Memory
Chemokine		Corticosterone
Hematopoietic		Neurotrophin
Neutrophil		Neuropilin
Hemopoiesis		myelin
Response to bacterium
Defense response
Transcription factor ap-1 complex
Detection of bacterium
Inflammasome
MHC class I protein complex binding
Immunoglobulin
IgE binding
Natural killer cell
Histamine
Bacteri
proptosis
Pattern recognition receptor signaling pathway
mhc class ii
fever
