# Supplementary material for: Immune, RNA, and Neurocognitive Genetic Networks in Bipolar Disorder Subtypes: A Transcriptomic Meta-Analysis
Source: Research Square preprint supplement (doi:10.21203/rs.3.rs-3508951/v1), 2024-01-17
Supplement: Supplementary file 3 [file e1a8c3fb81e6b713c8d7ecac.xlsx]

## Sheet: P Value < 0.5
Savitz_PBMC_Bipolar_vs_Control		Savitz_PBMC_Bipolar_Type_1_vs_Control		Savitz_PBMC_Bipolar_Type_2_vs_Control		Savitz_PBMC_Bipolar_Type_1_vs_Bipolar_Type_2		Kim_Neurons_Bipolar_Type_1_vs_Control_Time_Independent		Arion_Neurons_Bipolar_Type_1_vs_Control		Arion_Neurons_Bipolar_NOS_vs_Control		Bahn_Postmortem_Cortex_Bipolar_vs_Control		Liu_Cerebellum_Bipolar_vs_Control		Iwamoto_Prefrontal_Cortex_Bipolar_vs_Control		Matigian_Twin_Lyphocytes_Bipolar_Type_1_vs_Non_Bipolar_Twin		Witt_Blood_Bipolar_Type_1_vs_Control		Clelland_Blood_Never_Medicated_Bipolar_Type_1_vs_Control		Clelland_Blood_Bipolar_Type_1_vs_Control		De_Baumont_Frontal_Cortex_Bipolar_vs_Control		Chen_Liu_Cerebellum_and_Parietal_Cortex_Bipolar_vs_Control		Logotheti_Skin_Fibroblasts_Bipolar_Type_1_vs_Control		Chen_Parietal_Cortex_Bipolar_vs_Control		Hilscher_Lymphoblast_Fibroblast_Lithium_Treated_Bipolar_vs_Control		Abdolmaleky_Prefrontal_Cortex_Bipolar_vs_Control		Cruceanu_Anterior_Cortex_Bipolar_vs_Control		Bousman_PBMC_Bipolar_vs_Control		Vawter_Anterior_Singulate_Bipolar_Type_1_vs_Control
Gene	LogFC	Gene	LogFC	Gene	LogFC	Gene	LogFC	Gene	LogFC	Gene	LogFC	Gene	LogFC	Gene	LogFC	Gene	LogFC	Gene	LogFC	Gene	LogFC	Gene	LogFC	Gene	LogFC	Gene	LogFC	Gene	LogFC	Gene	LogFC	Gene	LogFC	Gene	LogFC	Gene	LogFC	Gene	LogFC	Gene	LogFC	Gene	logFC	Gene	logFC
TNF	0.789	CECR1	0.33	SNORD14C	0.4542	AUTS2	-0.459395	KANSL1-AS1	1.2602	MALAT1	0.629005	CTSK	1.13859	TAC1	-0.802113	PTK2B	-0.256748	BMP1	-1.27362	NKX6-3	-2.91125	EZH2	1.66	SSPN	0.840604	ZNF585B	-0.57434	TEX2	0.0886017	CYBB	-0.456331	SLC39A8	-3.33531	TMEM52B	-0.19291	TDRD9	-0.555907	CCNT2	0.0949195	B3GALT2	-0.96117	AY194294	-0.859435	DDX3Y	-0.917
ARID4B	-0.45	ACCSL	0.187	SNORD14D	0.363421	ASGR2	0.617351	ZNF578	-2.28759	EIF4A2	0.724757	ZNF540	1.07213	ECHDC2	0.276286	PGGT1B	-0.21112	MAP2K3	1.15767	SOX6	-4.72615	SH3YL1	-1.21	SEPT2	-1.14005	SLC35D1	-0.437122	EIF3F	0.140607	ETV5	-0.308222	RAB12	-2.04639	OLFML3	-0.247079	SLC24A1	0.319777	ATP2C1	0.122777	CHRM2	-0.933472	LOC100128751	-0.859435	Yq11	-0.917
ZYG11B	-0.36	UBL4A	0.443	TUBB4B	0.729975	CD247	-0.494646	COMT	0.941026	TIMM16	-0.43013	MRO	-1.01501	PSMD7	-0.301246	LAMB1	-0.394819	SLC28A2	-1.42863	LINC00973	-3.79191	ZNF528	-1.46	SLC20A1	-1.43204	AGMAT	-0.557105	TNFSF10	-0.271624	TAPBP	-0.118009	ZNF788	-1.08882	OLR1	-0.498102	PRKCE	0.255686	MCCC1	0.116798	VWC2L	-0.945128	INM04	-0.859435	DDX3X	-0.917
IER5	0.709	BIRC2	-0.421	IER5	0.878876	XBP1	-0.445023	URB1-AS1	0.703369	IL7	0.798519	MIB1	1.57288	EPB41L3	-0.52634	NME6	-0.238664	GPR143	1.36337	MIR4500HG	-3.27843	C3orf32	1.06	PPBP	-0.931391	TMEM97	-0.443157	SPDL1	0.105949	LPAR6	-0.268833	KCNS2	-1.85113	OSBP2	-0.101527	ZNF264	0.21581	CELSR1	0.106725	RXFP1	-1.25355	GSN	0.435765	AF000984	-0.917
SNORD14D	0.277	GNPDA1	0.375	TNF	0.910082	CST7	-0.584735	LARGE-AS1	0.712185	BPTF	-0.52224	EPT1	-1.02742	EIF5	-0.492475	AKR1C1	-0.441024	CEP164	-0.89572	DES	-3.29718	ARL17A	-1.08	DLG1	-1.45598	CEP41	-0.529965	APOC1	-0.270696	PSMB6	-0.178149	LRRC56	1.33538	CYBB	-0.563591	CEP63	0.231622	MAN1A1	0.0490951	SLC35F1	-0.537425	gelsolin	0.435765	EIF1AY	-0.773
SNORD14C	0.329	RUFY1	0.619	COL4A3BP	-0.562095	TSPAN4	0.536719	FAM132A	2.2594	PTPRF	-0.582799	HPSE	0.771741	UBE3A	-0.34253	CATSPERG	-0.244981	GIT2	1.12113	CEMP1	-3.21535	TMBIM1	0.601	ANAPC5	-1.06188	MED19	-0.268715	ZFAS1	0.143984	AP4M1	-0.169905	MYH11	-1.0195	PRDM1	-0.233716	ZBTB38	-0.221321	CCNC	-0.0866108	RASGRP1	-1.1435	9q33	0.435765	AF000987	-0.773
SERTAD1	0.605	SPOCD1	0.648	ARID4B	-0.489774	NT5C3A	0.386829	PDGFRA	-2.76724	MMAB	0.239856	CHCHD4	0.841123	NDUFA5	-0.408238	VEPH1	-0.629668	MCAT	-0.431553	OXR1	2.58275	SLC6A5	0.993	VNN1	1.61149	C1orf228	-0.455921	SYCP2L	0.162937	MPDU1	-0.15823	SCRIB	-1.02396	MEPE	0.373059	MARCH2	-0.766202	MYLPF	-0.0532157	SSTR2	-1.27247	AK125819	0.435765	UTY	-0.643
RBM39	-0.487	BCL2L13	0.353	SNORD30	0.386246	TNFSF14	-0.279018	UBE3B	0.915464	OR10R2	0.109424	FAM53A	0.913912	KCNK1	-0.406252	CREBL2	-0.211194	RASSF9	1.80328	NEK11	-3.17093	REC8	0.706	PRPF38B	-1.03832	TAF4B	-0.43384	KIAA1109	0.0738693	ELMO1	-0.214272	SPANXD	-0.886666	AP4M1	-0.12791	GABRA4	-0.236858	C20orf172	-0.0399337	DIRAS2	-1.22479	HIST1H4I	0.424941	AF000994	-0.643
TUBB4B	0.525	ARID4B	-0.41	SNORD12C	0.518625	ORMDL3	-0.382978	ZNF736	-1.63202	SLC12A4	0.205294	C4orf44	1.33941	TIMM17A	-0.365848	SIX4	0.177035	DCBLD2	0.946212	L3MBTL1	2.56368	ZNF526	0.846	PTPN2	-1.12582	TMEM41B	-0.257838	TAF15	0.135966	AIF1	-0.272985	IGSF3	-1.22518	AURKA	-0.160688	S100A8	-0.187626	ITSN2	0.0626685	LRRC55	-0.971319	BC067496	0.424941	USP9Y	-0.902
SNORD12C	0.404	SASH1	0.466	ZYG11B	-0.38101	GRK5	0.315751	C4orf17	-1.19536	BAT5	-0.441438	PLOD3	1.29847	CAND1	-0.449818	SVOP	-0.319619	KITLG	1.47989	OR1J2	-3.23969	ATP7B	0.804	TMEM41B	-0.416683	VPS72	-0.180738	MAMLD1	0.105849	CD4	-0.169273	RPP30	-1.13074	ATP8B4	-0.274431	FGF22	-0.181822	ANKRA2	0.105842	SLC7A14	-0.782357	OR52W1	-0.963666	TTTY15	-0.902
UBL4A	0.333	ASGR2	0.677	SNHG7	0.38027	MTMR11	0.595289	MRS2	-0.936399	NDUFS2	-0.470308	TJP1	-0.937741	RTN4	-0.390719	LDHA	-0.205684	CRKL	-1.40304	LAMC3	-2.24337	C7orf44	-1.2	GABPB1-AS1	-0.804813	GABPB1	-0.304009	ZBTB39	0.13412	AOAH	-0.26439	BCHE	-2.36526	STAB1	-0.175051	GNRH1	-0.208272	CLEC2A	-0.0838029	KCNA6	-0.692825	BC137225	-0.963666	USP9X	-0.902
ERGIC2	-0.321	ZYG11B	-0.339	TFDP2	0.367287	TGFBR3	-0.525193	LRRC37A4P	-0.840228	TPM3	-0.312224	CRB1	1.38895	SUCLA2	-0.51632	SEZ6L2	-0.16984	SOCS1	0.80053	SOBP	2.28282	PIK3R2	0.865	PNISR	-1.47406	ODF2	-0.375512	ENPEP	0.105637	CD274	-0.27745	S100P	-0.746614	LPAR6	-0.325914	IL22	-0.173149	CASZ1	0.0550069	CLSTN2	-1.32379	CNR1	0.478233	AF000986	-0.902
RPS6KA3	-0.395	KIAA0930	0.384	KRT1	0.574802	SHTN1	0.605892	C6orf203	-0.439159	---	0.203989	DNA2	1.19239	FBXO9	-0.414169	MYL6B	-0.111026	ARHGAP4	-0.570719	CCDC136	-2.88848	SNX8	0.969	ANXA2P1	0.541748	ZNF706	-0.328063	TMEM173	-0.145625	ANP32D	0.13224	SARDH	-1.06632	ZNF724	0.260967	CD44	0.270037	SSX2IP	0.0621296	RPS17	1.50909	X54937	0.478233	CYorf15B	-0.585
LGALS4	0.173	TFE3	0.252	FAM20B	0.320913	SERPINF1	0.285774	ABHD5	1.20566	NTRK2	0.831069	ZDHHC11	0.62307	SST	-0.788666	RABGGTA	-0.127958	IK	-1.41993	LPAL2	-2.62472	CD9	0.715	PHF11	-1.09029	GMEB1	-0.262769	CBX3P2	0.129855	PRDX3	-0.139294	LOC100132831	-0.962517	PCDHA3	-0.117381	MAPKAPK3	-0.192203	C1orf62	-0.0729281	linc-KARS-3	-1.2217	PRSS21	0.44258	CYorf15A	-0.585
GNPDA1	0.282	TNF	0.667	PPP1R2P9	0.350927	UTY	0.372174	ZNF559	-0.775911	TAF9	-0.591289	VAV2	1.10617	ARPP19	-0.388913	RNF19B	-0.167726	KCNV2	-1.01863	LOC149351	3.25166	SERINC2	1.06	HEXA	-0.649359	THNSL1	-0.221546	MS4A7	-0.319286	DOCK8	-0.256113	ANKLE1	-0.742866	PMVK	-0.0945313	RDH8	0.184104	CNOT2	0.0853552	SRD5A1	-0.702256	AB031330	0.44258	AL832583	-0.585
CISD1	-0.393	C1QB	0.412	SNORA33	0.560107	SUMF1	0.285222	BGN	-2.28128	SLC25A14	-0.405292	HTRA1	-1.51392	NEUROD6	-0.362479	AVIL	0.183502	PHACTR4	1.57611	TACR1	-2.5696	NAPA	0.668	TEFM	-0.965336	LOC105373849	-0.211464	ATAD2	0.10402	USE1	-0.131555	FRS2	1.0591	PNOC	-0.189248	TCFL5	0.212709	ZDHHC24	0.0464523	linc-SFSWAP-3	-1.89756	ABAT	0.579257	AK127387	-0.585
SNORA73B	0.147	MROH8	-0.17	SNORA61	0.46126	CHMP3	0.372405	LOC100130654	1.08335	AEBP2	0.470133	CERKL	0.5671	DNM1L	-0.459297	RAB37	-0.245236	ENPEP	1.9052	LOC100287525	2.07908	KIAA1267	-1.27	PLAU	0.470958	PSTK	-0.310517	ARHGEF10	0.267458	ITGB2	-0.20211	ADAM21	-0.731206	SST	-0.560445	SSPO	0.196051	ARIH1	0.0447034	BMPER	-0.638963	BX537362	0.579257	TMSB4Y	-0.565
SOCS1	0.381	SLC31A2	0.69	RBM39	-0.555501	SLC25A48	-0.291477	PTGER4P2-CDK2AP2P2	0.600827	AP3B2	-0.662407	LARP1B	1.35548	PRKACB	-0.214573	RUNDC3A	-0.123204	NFE2	1.04292	LOC101928475	2.63912	LGR5	0.783	ARID2	-1.21675	CHD2	-0.402277	KNTC1	0.108138	OLFML3	-0.180017	MEST	-1.84458	UNG	0.15926	CHRNA3	-0.223017	DLX5	0.116577	RP11-13L2.4	-1.42397	GATA2	-0.435523	BC119763	-0.565
SYNJ2	-0.205	PIK3C2B	-0.195	SNRPD3	-0.292747	CYFIP1	0.418949	MOSPD1	0.576016	VNN1	0.153618	STX17	1.07091	MAGI1	-0.321344	COPS7A	-0.192123	GAK	0.748162	LEXM	-2.29428	PLOD2	1.63	GNAS	-1.05204	GABPB2	-0.290015	TTC7A	0.190653	CXCL12	-0.167225	FAM189B	0.92625	ITGB2	-0.257665	RASA2	0.23632	BECN1	0.116789	CDH6	-0.601685	BC051342	-0.435523	TTTY14	-0.545
TBX22	0.151	CRIP3	0.193	CHCHD7	0.372937	PTOV1	-0.383693	CNTNAP2	1.23791	TPI1	-0.190913	HNRNPA1	-0.362062	HSP90AA1	-0.282563	SGTB	-0.179182	UCP3	-0.880568	PRRX2	-1.95346	ZNF546	-1.3	PIK3C2A	-1.35537	ZNF529	-0.39314	DSTYK	0.0995835	TLR6	-0.20504	CLEC17A	-0.929197	COQ2	-0.0933261	PTCD3	-0.250456	INDO	-0.0715012	PITX1	1.2056	HDC	-0.763109	NCRNA00185	-0.545
DRC7	0.193	CLDN9	0.151	DIP2A	0.270666	LINC01119	-0.266199	ULK4	0.538904	RGS10	0.222627	ATP6V1G1	0.732045	PBXIP1	0.335818	MFN2	-0.11045	RS1	-1.4789	TBX2	-2.23986	CNPY4	1.1	PF4	-1.1682	ZNF764	-0.244711	SLC25A21-AS1	0.25392	C3AR1	-0.299275	LFNG	0.884905	PCDHA4	-0.142775	CNOT6L	-0.155852	GTF2IRD2	0.04651	Metazoa_SRP	2.0796	M60445	-0.763109	AF332243	-0.545
DNAAF5	-0.278	TCN2	0.327	WTAP	-0.310477	IRF2BPL	0.391387	ZNF502	-0.675735	FDX1L	-0.46101	CD200R1	0.747607	PPA1	-0.29116	SCRN1	-0.169507	SGPL1	1.28944	VWA5B2	-2.43727	PTGFRN	1.09	CBFA2T2	-0.925028	MGAT4A	-0.328654	EIF3E	0.0594675	PSMD8	-0.151122	TXNDC2	-0.703677	PTPRE	-0.142576	AJAP1	-0.177844	WDR5	0.0411229	RP11-638F5.1	-2.16733	MAGEH1	0.390298	XIST	1.86
RNVU1-7	0.842	TIA1	-0.316	VTRNA1-1	0.298548	S1PR1	-0.563503	ZNF717	-0.707356	TMEM155	-0.537163	GALNT4	0.598277	CHD4	0.192953	STMN2	-0.178473	KRT7	-0.852644	ATAD3B	2.9275	AP2S1	0.72	TRAPPC10	-1.09382	DNPH1	-0.381772	PTPN11	0.08165	PTPRE	-0.123634	NOMO1	1.14448	LOC102724229	0.229574	DAAM1	-0.332389	MORC3	0.0520824	RPRM	-0.935863	AF143235	0.390298	HLA-DPA1	-0.606
RNVU1-18	0.876	FDFT1	-0.388	BRD4	-0.222729	MYBL1	-0.720226	OTOF	0.699745	IL1RAPL1	-0.438375	SLC23A2	1.37276	EEF1E1	-0.399539	ETV5	-0.450669	FGF4	1.74154	SULT1C2	2.84833	CDC42BPA	1.49	TXLNGY	-1.13754	PLD4	-0.466544	HLA-DRB1	-0.173594	PIH1D1	-0.114517	PRR27	-0.964207	ENDOU	0.176135	SPATA33	-0.148166	FBXO44	-0.0894914	SCRG1	0.711408	PGLYRP1	0.516864	AK292709	-0.606
SNORA70	0.362	SLCO3A1	-0.343	HP	0.575745	NIN	-0.233776	KIAA1033	0.403365	SMURF2	0.469292	S1PR2	0.455307	PDS5B	-0.39387	PSMD8	-0.147482	NDRG2	-0.950138	LINC00486	-3.8524	ZNF498	-0.605	SRSF4	-0.956618	SEC24A	-0.255248	ZNF266	0.102011	NR1H2	-0.104493	ZFYVE9	0.621634	ZNF726	0.121842	SAC3D1	-0.25609	LRAP	-0.0464799	CYP26A1	-0.769968	AF076483	0.516864	M27487	-0.606
GMCL1	-0.26	OPRL1	0.204	SERTAD1	0.686498	PRKCDBP	0.257739	FOXN3	0.714049	C20orf117	0.20486	HHLA3	1.26932	SEH1L	-0.422685	ARMCX1	-0.132428	PLCB3	-1.32709	MDGA2	-2.97523	CSE1L	-1.53	RBM5	-1.25416	TOX2	-0.428146	C8orf33	-0.083934	MT1E	0.289186	INS	-0.804652	RPL39L	0.163068	CACNB2	-0.336974	IL17F	-0.0529238	CCL2	1.27923	HIST1H4B	0.622609	BC009956	-0.606
DIO2	0.168	EXOSC8	-0.312	TMEM72	-0.243746	C19orf70	0.264726	ST6GALNAC5	1.28225	AXL	0.615408	PPIG	-0.726852	SUB1	-0.286574	UQCRC1	-0.172292	SEC24C	-0.454613	SNAI2	2.41689	KRBA2	-0.998	XPO1	-0.951172	CYP1B1	0.703818	HLA-DRB5	-0.203121	LY86	-0.301269	PIWIL1	0.698548	PBDC1	-0.170479	DCX	-0.184319	MIPOL1	0.0567329	PXN	0.566408	BC069467	0.622609	CR617728	-0.606
SP4	-0.335	PCCB	0.221	SNORA70	0.472849	MIR382	-0.273254	C21orf58	-0.911413	CISD1	-0.248525	MYEF2	1.06032	CDH12	-0.395354	SCARNA9	0.206994	NRP1	1.04648	WLS	-1.97505	GRINA	0.815	GSE1	-0.703095	ZNF329	-0.404913	FRYL	0.165942	HAX1	-0.155617	HTRA3	-1.04495	ELP5	-0.137922	RPS2P45	-0.152465	FLJ22313	0.0479523	RNF122	0.704903	SLC45A3	-0.649574	CR601798	-0.606
WRNIP1	-0.356	ADM	0.694	GADD45G	0.576925	RPS4Y1	3.50353	ZCCHC24	-1.2043	TARBP2	0.181165	C4orf37	0.45796	ARMCX3	-0.480763	TEX35	0.154715	PGLYRP1	-0.911221	ZNF280A	-3.03515	CDKL3	-1.18	YME1L1	-0.936342	HADH	-0.278999	DNAJC4	-0.11579	TMEM19	-0.168385	LPIN2	-0.83291	CXCL12	-0.190545	BLVRA	0.202073	YY1	0.0706311	GPR158	-0.810024	AY033593	-0.649574	TTTY10	-0.484
KMT2C	-0.258	TMEM140	0.499	OSBPL8	-0.553074	ZSWIM7	0.694079	TUBGCP4	-1.34279	C6orf35	-0.622695	RNF39	0.833671	SMTN	0.220371	FUS	-0.115788	RAD54L2	-0.952909	VAV3	-2.19589	RPL41	-1.04	COX20	-0.949861	SLC25A45	-0.268396	ALDH1L2	0.103241	CHMP2A	-0.0745521	LOC101927855	-0.786372	LPIN1	0.134857	RIT1	-0.351846	NEK7	-0.0506688	NEAT1	0.793831	CDK5R1	0.351455	AF332239	-0.484
AVL9	0.157	VAMP5	0.729	RNVU1-7	1.1024	KDM5D	1.00501	MMP16	-0.643037	CPNE3	0.651659	MMP2	0.459454	FGF13	-0.469318	DNM1	-0.134846	DKFZP547J0410	1.69602	MYH1	-2.82234	SIGLEC1	0.963	MTHFSD	0.531588	PIGW	-0.361367	C1orf94	0.148251	PPT1	-0.136968	LLGL2	-0.761026	MPEG1	-0.20041	SP1	-0.190681	HSPC196	-0.0609286	AC007750.5	-1.24325	BC030792	0.351455	FOS	-0.842
EXOSC8	-0.242	FAM58A	0.25	SNORA73B	0.188033	DDX51	-0.5154	EDNRA	-1.95148	PRDX5	-0.326473	BTNL9	0.850867	FAM107A	0.46023	DLG4	-0.150053	GPSM2	1.06413	PCDHB4	2.6457	CBX1	0.561	MAP3K8	-0.931152	GID8	-0.244671	WDR19	0.0793948	CD69	-0.256468	JAG2	0.628802	WIF1	0.608286	MGC4859	0.199891	STARD6	-0.070461	ST6GAL2	-0.459371	AFAP1	0.419984	BC004490	-0.842
COL4A3BP	-0.376	HIST1H2BJ	0.453	SCARNA17	0.22794	ZNF831	-0.337975	LOC101928201	-1.64525	HS1BP3	0.210579	HCFC2	-1.14955	DDAH2	0.239362	ERGIC1	-0.10219	ATXN3	0.634353	LOC101928850	2.64153	DNAH5	0.698	RBM25	-1.24161	LOXL1-AS1	-0.46387	HLA-DMB	-0.234283	HDAC9	-0.164531	DDX20	-1.12669	FCGBP	-0.150046	NEDD4L	-0.312961	CGGBP1	0.0462013	SPHKAP	-0.911747	4p16	0.419984	HSFY2	-0.473
SLC12A2	-0.238	ERMN	0.13	SNORA57	0.427172	SPOCD1	0.720129	WFS1	-1.51611	EYS	0.881859	TEAD2	0.617982	KCNV1	-0.450595	SLC35B4	-0.138884	CHD2	-0.754553	LCN2	2.44589	IL1B	0.817	TTC14	-0.680773	FCER1A	-0.65917	WEE2-AS1	0.182409	HPGDS	-0.189206	ADH1B	-2.88195	AIF1	-0.31046	ATRX	0.190239	HSD11B1	-0.0464977	RP11-864I4.4	1.49346	AF188700	0.419984	HSFY1	-0.473
HLA-A	0.298	ENO1	0.463	MXI1	0.351978	COX6C	0.375078	TBX15	-1.04876	CTSK	0.394121	ZFHX4	0.685529	MLC1	0.448126	ARL2BP	0.185132	REN	1.03483	FXYD7	-2.05968	NCRNA00152	0.784	SATB1	-1.14046	DNAJC16	-0.398912	CEP95	0.0837668	C3	-0.432319	UPK3B	0.777305	XRCC2	0.13695	IVNS1ABP	0.333866	EDNRB	0.0674167	NUAK1	-0.679685	HTR1F	-0.349919	BC036567	-0.473
GIMD1	0.146	EIF2B1	0.262	LYPLA1	-0.366781	SNORD123	-0.282459	GPATCH2L	0.584555	PDIA6	-0.497155	TOM1L1	1.27711	ETNK2	0.19192	WSCD2	-0.177831	MAN1A1	1.15608	LOC100506207	-3.01577	PVALB	1.48	PRKRA	-1.20182	LEF1-AS1	-0.426209	KIF11	0.174893	LDLRAD4	-0.127315	MYCT1	0.657106	RPL24	0.109569	ASNS	-0.182072	SUMF2	0.0635796	CLMP	-0.670147	3p12	-0.349919	TSIX	0.732
CCNH	0.228	MTMR9	-0.223	PWAR5	-0.196525	DNAJB14	-0.271942	GLT8D2	-1.69327	IFT81	-0.747807	CACNA1C	0.660764	SKP1	-0.263256	ARMC6	-0.142067	IFNA4	-0.784373	TNFRSF25	1.94576	ZBTB44	-1.12	STK4	-1.04276	ZCCHC10	-0.295772	CCDC138	0.135467	STAB1	-0.120355	FAM162B	-1.26638	CYB561A3	-0.109106	PTPN11	0.352092	PARP9	-0.0487219	FAM102B	-0.832065	BC069125	-0.349919	NLGN4Y	-0.395
SASH1	0.331	CES1	0.219	CITED2	0.617629	PEG10	-0.21377	LTBP1	-1.22741	CNP	-0.445973	LOC100133091	0.951457	RCHY1	-0.454813	DYNLT3	-0.174353	CBFA2T3	-0.617348	BRINP3	-1.68913	KCNH3	1.27	PCBP2	-1.13668	OPA1	-0.409867	FAM161A	0.106101	DOCK2	-0.190428	CCNL2	-0.768363	TAPBP	-0.102764	TCP11L2	-0.168656	SLC7A6OS	-0.0626139	ST13P4	0.826539	ANXA3	0.519816	AK295117	-0.395
OSBPL8	-0.409	CFL1	0.264	IREB2	-0.28637	CHCHD4	0.304729	PRRX1	-2.2747	LIG3	-0.933249	FAM175A	1.02795	TULP3	0.244961	PRKAR1A	-0.103963	ZBTB25	0.74566	MGC16025	2.89421	HFM1	0.775	SYMPK	-0.66405	BRWD1	-0.282929	ROR2	0.158179	PPP1CA	-0.108087	RNF128	0.977462	DOCK8	-0.334596	CREB1	0.296435	C12orf57	0.062201	RP11-143K11.1	-1.15182	BC000871	0.519816	AY358562	-0.395
RNU1-3	0.73	ATP5S	0.278	RPS6KA3	-0.46836	KCNK6	-0.329185	MGC57346	0.493198	S1PR2	0.213479	DDRGK1	-1.93912	NELL1	-0.510624	TRIM24	0.118482	FARP1	1.08283	PTGER3	2.44307	HAUS2	-0.705	RAB11FIP3	-1.26205	PAPOLG	-0.251855	ARHGDIB	-0.122417	RPL41	-0.161144	KLHL11	0.894908	HDHD2	-0.11087	MALAT1	0.22582	FLJ10803	0.0300639	KIAA1456	-0.651406	RCN3	-0.457065	NLGN4X	-0.395
UPF3A	-0.302	ITGB5	-0.193	SLC35A2	0.334084	KIAA0408	-0.410548	DNM3OS	-2.28327	EIF3K	-0.352996	C2orf7	0.996831	NBEA	-0.57323	EXOC6	-0.21595	RARB	1.13568	JPH2	-2.31335	PCBP2	0.576	ZCCHC7	-1.11398	PIAS2	-0.382044	SASH3	-0.297563	TMEM126A	-0.206352	FANCA	-0.751934	MT1E	0.30477	MGC12916	-0.166144	LONRF2	-0.0830787	RP11-628E19.3	-0.71749	AY195859	-0.457065	PCDH11Y	-0.324
NR2C2AP	0.228	CTSH	0.42	TRAK2	0.636491	PGA3	-0.218858	RWDD2B	0.650126	FAM169B	0.126014	BBS7	1.16465	FABP3	-0.323758	GDPD5	-0.138148	FES	-0.921368	GRID1-AS1	-2.78697	UAP1L1	0.574	NKTR	-0.886368	USP42	-0.221383	ZNF273	0.164527	IRF8	-0.276269	STX19	-0.788711	C8orf33	-0.0881415	GAD1	0.23204	CCDC62	0.0426699	PDZRN4	-0.595483	MS4A2	-0.692508	PCDH11X	-0.324
NF2	-0.126	RAB38	0.286	MYL4	0.817179	DCANP1	0.256276	HEY2	-1.25699	FBXO2	-0.610086	DBR1	1.08801	GHITM	-0.262908	PAM	-0.227493	HIST1H2AC	0.553268	RBMY3AP	-3.25182	CPSF4	0.699	TRMT13	-1.4993	ARIH2	-0.270592	PLA2R1	0.056897	TXNDC15	-0.1124	ERCC8	-0.635705	PRSS35	0.217804	RIMS3	-0.21563	YWHAQ	0.0491646	PAPPA	-0.696833	11q13	-0.692508	AF277053	-0.324
NBPF10	-0.431	PTH1R	-0.167	MAP6	0.217653	NME6	-0.284893	PLXNA4	1.11676	SNAPC4	0.214643	DNAJB2	-1.39863	DCLK1	-0.524769	CPLX2	-0.214487	KDR	1.15609	CLTB	-1.81664	MBOAT2	1.53	DCAF8	-0.830366	C1orf174	-0.188011	CISD3	-0.0776684	MT1P3	0.191526	HBD	-0.66233	CABLES1	0.371255	PRTG	-0.188071	CENPH	0.0460271	SV2B	-1.12969	D10583	-0.692508	AF332219	-0.324
GNL3L	-0.311	RENBP	0.438	NBPF10	-0.577829	VNN2	-0.467099	PDGFRL	-2.51918	UQCRFS1	-0.45021	---	-0.282129	PGK1	-0.396214	ST8SIA4	-0.143472	CROT	1.80997	MECOM	2.58207	GAA	0.673	DCAF5	-0.45034	RPIA	-0.267308	FKBP14	0.132287	LDHA	-0.189376	GPR182	1.18496	SYNDIG1	-0.135061	TANC2	0.200134	KCNQ1	-0.0652494	ROBO4	0.703606	DMXL2	-0.501405	AB051441	-0.395
SNORD30	0.267	MICU1	0.304	IL17RD	0.176946	XIST	-1.0055	MVK	-0.902967	TF	-0.76406	EGFR	0.71652	EPS15	-0.343788	U2AF1L4	-0.205794	CACNA1D	-0.535658	LINC00887	2.79187	PLD2	0.88	PBX1	-1.2261	PPP3R1	-0.616251	CYBB	-0.263722	CABLES1	0.304516	CD164	-0.734869	ARSB	-0.100569	LOC101928727	0.15609	SLC35E2	0.0391907	AC009487.5	-1.15078	AF389880	-0.501405	KIAA1654	-0.395
PLEKHA2	-0.255	HIST1H2AG	0.35	AKAIN1	0.228714	CDH23	0.316979	EPS15	-0.345235	MYO6	0.539522	GYPA	0.677687	LRP12	-0.194466	CARS2	-0.106016	GNAT1	0.927032	WNT7A	2.51411	QRICH2	0.82	GALNT10	-0.611555	CNOT11	-0.177311	PBDC1	-0.136468	AARS	-0.129702	ANAPC11	-0.687976	RAB5B	0.109148	PSPH	0.600189	AACS	0.0665706	KCNK2	-0.626611	MPZL1	-0.399821	ZFY	-0.405
TANGO2	0.236	USF3	-0.196	PCDHGA4	0.168074	AFG3L2	0.3701	HAPLN1	-3.26403	NHP2	-0.596717	RNF7	0.440843	SNTA1	0.26817	ZP2	-0.664225	MMP14	0.733399	LINC01138	-3.32164	ZNF767	-1.26	FUS	-0.999171	CINP	-0.293578	MMACHC	-0.115061	FDX1L	-0.0919423	CDIP1	-1.23649	KAT5	-0.10837	SLC15A1	-0.140496	C3orf39	0.042198	MRAP2	-0.82525	AY359019	-0.399821	ZFX	-0.405
ANAPC16	-0.36	CHMP4B	0.301	PLEKHA2	-0.322124	TIMP2	0.364275	RHOJ	-0.601079	GPR142	0.195551	ATP5O	0.32741	PQLC3	0.22087	AP4M1	-0.184755	NCAM1	-0.344394	DAND5	2.28116	ADCY4	0.828	LARP7	-0.831523	MTMR9	-0.203124	SELT	-0.073161	ZNF516	0.112542	KBTBD7	-1.02042	ITIH4	0.133483	FILIP1	-0.275395	C14orf10	0.108985	MT1L	0.870965	PLAGL2	-0.456044	BC114960	-0.405
VAMP5	0.559	TFF2	0.173	RPS26	-0.196881	HIST1H2BD	0.451178	GOSR1	1.81608	PAK1	-0.240254	GPR107	-1.02407	WSB2	-0.233002	PPP1CB	-0.117713	CSF2	0.93814	TMEM67	-3.61719	ZC3H14	-1.05	SPX	-2.20787	RAD1	-0.325392	IGFBP3	0.142407	SAT2	-0.0936854	SOCS5	-1.1312	CHRNA6	-0.208728	LOC339803	-0.296578	PLA2G5	-0.0591392	CTD-2196E14.4	-0.698142	AF006005	-0.456044	AK125659	-0.433
TIMM17B	0.212	GUCA1B	0.162	TBPL1	0.229772	GGT7	-0.233888	STXBP5-AS1	1.26967	TMEM2	0.474204	NTM	-0.446489	TPGS2	-0.290481	PSMB6	-0.170428	NECAB2	-0.798012	FAM184A	1.60802	RDM1	-1.33	PWAR6	-1.22113	DCAKD	-0.337738	ZNF791	0.114612	PLCB2	-0.142086	DFNB59	-0.859302	SMIM11A	-0.122251	ABTB2	0.224284	RCBTB1	0.0312716	PCDHAC2	-0.816594	TAS2R7	-0.402269	TLR2	-0.433
SLCO3A1	-0.301	OR2B6	0.188	DNAJB2	0.357603	PLIN2	-0.23482	LATS1	0.605039	GIMAP8	0.126595	ABCG4	0.768106	DNAJB9	-0.308293	DUSP4	-0.275009	MT1X	0.961629	ONECUT2	2.6838	MPG	0.812	TMEM267	-1.1458	DIS3L2	-0.207814	CD68	-0.234436	STOML2	-0.129073	LY6H	0.625345	RNVU1-15	-0.249473	RAD50	-0.212085	ZC3H10	0.0583459	CALCOCO2	0.506346	12p13	-0.402269	4q32	-0.433
FRG2DP	0.122	CDRT1	0.175	GTF3C5	0.34757	WTAP	0.268594	ERG	-2.20135	SIX4	0.695496	PTPN7	0.416301	COPS4	-0.45605	SLC37A4	-0.0999152	RGS12	-0.657123	LOC101929027	-2.39635	RING1	0.545	BCOR	-0.77148	DNASE2	0.230883	LAMTOR5	-0.0876902	P2RY12	-0.419368	TPTE2P6	-0.844018	GRAMD1C	0.381741	LOC158402	-0.201335	WFIKKN2	-0.0847318	RP11-750B16.1	1.13585	BC093992	-0.402269	NR4A1	-0.614
MSL3	-0.418	PRKCB	0.292	ANK1	0.539205	G6PC	-0.232256	RNASEH1-AS1	-0.601987	TP63	0.117863	FAM101B	0.698638	DYNC1LI1	-0.368913	CACNB4	-0.132477	TSHR	1.32332	CLCA2	4.1005	ABLIM3	0.681	USP31	-0.77131	SERBP1	-0.282017	DUSP5P1	0.223515	FZD4	0.112839	TTLL11	-1.53401	ACBD7	0.381968	ADCY1	0.202855	NUDT15	0.0707402	RP11-4F5.2	-1.0723	HIST1H4H	0.495345	12q13	-0.614
DNAJC21	-0.129	LIPA	0.57	GUK1	0.766336	EIF1AY	1.93607	LAGE3	-0.798405	PSG6	0.278672	CHID1	-1.19099	DNAJA1	-0.49531	PTPA	-0.133554	ARHGAP33	-0.53088	A2M-AS1	-2.71875	SULT1A1	-0.943	THUMPD3-AS1	-0.47255	PPIB	-0.30096	GBP4	-0.173617	DUSP1	-0.31316	CSN1S1	0.682214	HPGDS	-0.206297	FYN	-0.172701	PPM1E	0.0670656	RP11-680F8.3	1.73231	BC120939	0.495345	BC016147	-0.614
MAP6	0.158	ERGIC2	-0.321	MYH8	0.14371	TDP1	-0.476391	DUX1	0.808659	IQSEC1	-0.298517	MINA	1.41922	STK39	-0.287746	RAPGEF4	-0.167601	ATXN2L	-0.298704	ZDHHC17	-1.88503	MAD2L2	0.763	CRIPT	-1.10354	EIF1AD	-0.212882	SRA1	-0.125777	COPS7A	-0.150001	PLA2G16	-0.600259	ITGAM	-0.193652	LOC101927820	-0.166552	NUDT21	0.0373401	linc-ALDH1L1-2	1.26828	RRAGA	0.30692	DUSP1	-0.694
HLA-DPB2	-0.121	RNF20	-0.396	SOCS1	0.448867	DSC3	0.310195	CAMK1D	0.758155	TBPL2	0.146534	HESX1	0.592178	PRKAR1A	-0.324353	SNORD115-38	0.170628	DOCK2	-0.656669	BMS1P6	-1.48763	C15orf51	-1.34	GSPT1	-0.963688	INO80C	-0.284791	GGACT	0.139882	UQCRC1	-0.131614	ZNF423	-1.33271	RGS8	-0.212911	TRABD2B	-0.151773	WIPI1	0.0471285	SNORD114-20	-1.4669	BC009990	0.30692	5q34	-0.694
FOSL1	0.132	SMOX	0.448	LMX1B	0.175387	PDHA1	0.210558	COL1A2	-2.03063	CTBP2	0.487681	SYTL4	0.619866	ISCA1	-0.382547	FUNDC2	-0.189073	SALL1	0.737449	LOC100289283	-3.15158	PTPRS	0.757	TRIOBP	0.355031	MRPS16	-0.171455	NUFIP1	0.140151	LAGE3	-0.108028	EPHB6	-2.54304	CYFIP1	-0.116738	CNTROB	0.164836	PLEKHO1	0.0551135	CDS2	-0.408947	OR52K1	-0.566848	BC022463	-0.694
MAG	0.149	GUCY1A3	0.487	RPL10	0.204206	BLZF1	-0.549539	LRRIQ3	0.733208	TSN	-0.393361	CDC7	1.03385	RAB2A	-0.343779	USE1	-0.166095	PFKFB3	0.953829	LOC101929229	1.78916	ESPN	2.26	LCE2B	0.424177	ARGLU1	-0.473817	ZNF347	0.110889	FCER1G	-0.249513	ATP6V1C2	-0.656556	OPHN1	0.169802	DERA	0.192123	IFT140	-0.105928	IFITM2	0.928334	BC137056	-0.566848	SUPT16H	-0.403
DRD3	-0.116	PIGT	0.294	DEPDC5	0.15948	CEACAM6	0.239795	FOXC1	-2.12287	LAMP2	-0.532016	PLA2G4F	-0.268259	GCK	0.156169	EOMES	-0.250521	STIP1	-0.264897	XCR1	1.90242	ADCY3	0.865	NACA	-0.51584	ZBTB3	-0.207578	ZNF174	0.122042	FAM98C	-0.097317	CLDN18	0.652443	DISP3	0.128469	KCNH2	-0.179671	DMTF1	0.0365974	HCRTR2	-0.943139	HIST1H4C	0.411444	EFCAB8	-0.341
SNORA80A	0.225	FSTL3	0.16	ACSS3	-0.178265	IREB2	0.251762	NT5E	-1.88	CCRL1	0.178175	EHF	0.443482	CAPZA2	-0.499741	PHYH	-0.164024	SMARCC2	-0.377843	LINC01583	-3.74245	KLHL20	-0.583	EIF3B	-1.10658	TOMM22	-0.464383	C2orf88	0.113678	NCKAP1L	-0.199747	APOE	-0.926125	PCBP1	-0.103712	KYAT1	0.156445	ENOSF1	0.0376611	BAG3	0.788942	BC130558	0.411444	C10orf67	-0.308
ADM	0.557	KCNC1	0.171	FEV	0.189584	RAB3D	0.223881	LOC100289283	-0.78412	FSCN3	0.124654	MTCH2	0.607597	MAPK9	-0.421561	MPDU1	-0.231139	FAM63B	0.866395	ST6GALNAC5	-2.57499	PRMT1	-0.749	ALG13	-0.597087	TNFAIP8L1	-0.293757	SGO2	0.123463	UROD	-0.116129	MYZAP	0.790867	RANBP3L	0.583906	CXADR	-0.179617	NR5A2	-0.0659445	KCNK1	-0.832037	RGL1	0.298013	KAL1	-0.359
APBB3	0.462	SPEM1	-0.19	CDK5RAP2	0.215813	COL28A1	-0.235358	RASSF6	1.15859	PPP1R7	-0.478118	F11R	1.7189	DNAJC6	-0.317367	CENPO	-0.149558	MAZ	-0.374927	MPP7	2.45944	ANLN	0.733	LOC101927254	0.490056	CSTF2T	-0.381724	BICD2	0.0615147	PIK3CG	-0.120547	P2RY1	-1.22213	TLR6	-0.26307	KIAA1683	0.143448	RTN1	0.0544786	MTMR9	-0.490037	AF186780	0.298013	M97252	-0.359
GDA	0.152	SNORD123	-0.149	ZNF211	0.264891	PI16	-0.418502	IGLV1-44	-1.39123	RBMS2	0.257195	KLHDC9	0.909066	SYNJ1	-0.474912	GALT	-0.140593	FMO6P	1.08345	S100Z	1.96882	KDELR2	0.601	ANG	0.592532	PDSS2	-0.349611	SAMD8	0.0639557	MPI	-0.0992527	SCAND2P	0.879887	SLC38A2	-0.189052	LYRM7	0.181246	HNRPA1	0.0408775	PCDH17	-0.495054	GALNT14	0.365131	GSTM1	-0.452
ZNF830	-0.271	C21orf59	-0.238	UBE2E3	0.191314	AHCY	0.394676	TBC1D2B	-0.33583	CCDC144A	0.737498	TERF1	-0.77174	PCMT1	-0.631291	TARBP1	-0.18908	MMACHC	-0.377584	THRSP	-2.7439	DEDD	0.573	LOC286272	-0.961291	DEPDC7	-0.335549	BAZ1A	0.200898	TMEM52B	-0.112805	CAMK1D	-1.40119	CORO1A	-0.204181	IRAK1BP1	-0.224827	TTLL12	0.0998441	TOB1	0.565143	BC010659	0.365131	GSTM2	-0.452
ARID4A	-0.192	SNORD14D	0.191	SFMBT1	0.230904	RGS2	-0.445062	SCIN	1.00766	HN1	-0.390386	VMA21	0.602255	GLIPR1	-0.525569	MRPL53	-0.111842	HNF1B	0.583829	PDGFC	-2.33726	UBE2F	0.896	TSSK2	0.40942	TTC39B	-0.29578	CHKB	-0.0965602	GPR183	-0.206213	UNC13A	-0.842294	ZNF155	0.136634	MTG2	0.160005	ECT2	0.0351747	J01415.6	2.19933	AY358758	0.365131	J03817	-0.452
MROH8	-0.124	SIAH2	0.29	PLK2	0.172712	WDR18	0.433068	GOLGA6A	1.24065	ETV7	0.216426	ZNF804B	0.580381	COPZ2	0.148743	IFIT3	-0.2396	E2F5	0.349495	ITGA2	3.3763	PSEN2	0.751	EVL	-0.91989	TMEM19	-0.344594	ZNF585A	0.183394	OR7E13P	0.20358	ARHGEF39	-0.843803	LRIT2	-0.120379	DNAH3	0.11727	RBAF600	0.0569331	OTOL1	-1.51756	AB078144	0.365131	BC110380	-0.452
FAM133B	-0.34	MYOF	0.323	UTP23	-0.295085	ATF6	0.29519	CXCL12	-1.37268	DHX36	-0.41485	GPC6	1.1091	PSMA3	-0.286112	SLC17A5	-0.131716	PSKH1	0.871975	TSNARE1	-2.3967	KIAA0427	0.748	GUCY1B3	-1.44216	ZCCHC7	-0.252626	MCM8	0.0839723	PPP1CB	-0.109308	KIR2DL4	-0.533472	PIK3CG	-0.16881	ESRRB	-0.18992	CCND1	-0.0338964	IL12RB2	-0.761182	AK298735	0.365131	RIMBP3	-0.311
RDH14	-0.251	CHSY1	-0.287	DPM2	0.336018	MCTP1	0.374718	COL5A1	-1.08163	ATP6AP1	-0.489456	IFI27L2	1.00444	SRP72	-0.408439	TBL1XR1	-0.178526	SRRT	-0.479825	CTD-2350J17.1	3.35315	TRIM9	0.71	PTPRK	-1.01452	CENPV	-0.447174	ZNF565	0.0709391	RNASE6	-0.20595	MIR25	-0.805505	ZHX3	0.133329	FYTTD1	0.203376	ITSN1	0.0409206	VAT1L	-0.893594	AK122747	0.365131	RIMBP3B	-0.311
ELF4	0.247	RCAN2	-0.216	HNRNPA1L2	-0.195319	GPR50	0.254026	MYH11	0.484812	ARHGEF3	-0.564943	PMS1	-0.830105	KIFAP3	-0.514174	HDAC9	-0.226771	CCDC85B	0.919614	MAMDC2-AS1	-1.69378	SMC2	0.897	CSMD1	0.403254	HINFP	-0.159303	CDC5L	0.0550405	CSF1R	-0.213133	NBPF10	-0.573032	MS4A6A	-0.238372	AKT2	0.161102	POMT1	0.0330384	SYNGR4	-1.35201	AK022753	0.365131	RIMBP3C	-0.311
PCCB	0.166	VLDLR	-0.125	GBA	0.242906	SNHG7	-0.324153	SYNPO2	-1.14001	TSPAN32	0.12719	ZNF714	1.28236	CCNI	-0.308037	TMEM266	-0.174232	SEMA7A	-1.11638	IL2	-3.02928	ENSA	-1.26	GGTA1P	-1.19639	TNRC6C	-0.346648	COA3	-0.0774602	CORO1A	-0.15562	CASP2	-0.769795	SRSF2	-0.109876	CCDC185	-0.170063	HNRPA0	0.0551067	DCAF12L2	-0.898599	AK309417	0.365131	AB051453	-0.311
GTF3C5	0.253	SQRDL	0.361	TMEM120B	0.149657	ZNF76	-0.244907	CYP1B1	-1.74566	CDK5RAP3	-0.719107	ESRRA	-0.284446	FAR2	-0.303124	USP11	-0.13535	CHEK1	1.50767	BTN1A1	-2.09714	MITF	1.15	PDGFA	-1.40095	SLC35E1	-0.224913	ELL3	0.124442	PGLS	-0.109413	CRLF2	0.711233	NUBP1	-0.138851	ADGRG7	0.558061	JRKL	-0.0388003	MIR487A	-1.97709	OCLM	-0.781206	PHKG1	-0.304
UTP23	-0.227	IDH3A	0.264	PCDH10	0.153887	FHL3	0.315035	MAATS1	0.751003	ARL13B	0.508945	C4orf32	1.28422	CA12	0.260133	PIP4K2B	-0.0943189	MT1E	0.646826	LIN7A	-1.35036	KRT8	-1.29	EGLN1	0.635058	BZW2	-0.246198	USP45	0.0851565	CAPZB	-0.0792409	TCL1A	0.640505	IRF8	-0.283089	RHOT1	-0.154802	BNIPL	-0.0487117	GPRIN3	-0.532214	oculomedin	-0.781206	FAM193B	-0.325
MGAT5	-0.349	IKZF3	-0.243	RNF10	0.59026	OSBPL1A	0.384629	EHD4	1.16002	PI4KA	-0.406912	ATP1B1	-0.281025	SARAF	-0.297004	DHDDS	-0.186978	YBX3	0.525207	SFTA1P	-2.62415	KIAA0664P3	-0.955	GTF2H1	-0.437829	SNRNP40	-0.467817	ZRANB3	0.150009	COPS6	-0.111491	PRR14L	-0.82284	C9orf131	0.167005	ZNF208	-0.213561	C6orf54	-0.0566747	PLP2	0.815588	1q25	-0.781206	DOK3	-0.325
DYNLRB1	0.238	FTL	0.339	ID2	0.590072	SECTM1	0.213878	RYBP	0.500341	RBBP6	-0.507675	RAVER1	0.474195	UBE2D3	-0.358097	KAT5	-0.130531	ZNF136	0.819216	LOC100127886	-2.63914	---	-0.867	GTPBP8	-0.683403	SNRNP25	-0.28157	TNRC6C	0.102126	TOMM22	-0.197174	LSR	-0.932639	KMT2A	0.0887287	HIST3H2A	-0.195627	PPP1R9A	0.0710917	TREM1	1.47307	AF142063	-0.781206	BC004867	-0.325
C1QB	0.285	NR2C2AP	0.233	NR2F2	0.170316	PREX1	0.290105	TNNI3K	0.857188	PLSCR2	0.102075	NRBF2	-1.39073	RAB14	-0.405823	CPNE6	-0.233134	SLC9A3R2	-0.618794	GNB5	2.04277	C18orf25	-1.91	TAGAP	-0.843856	HSPA14	-0.21897	TNFSF4	0.146747	PAF1	-0.0965131	SLC6A2	-0.78552	ATF4	-0.143948	FAM171A2	0.148545	KCTD6	-0.0422751	NUDT10	-0.768612	VWA5A	0.343205	BC004564	-0.325
ZNF160	-0.406	GALE	0.319	HNRNPR	-0.29961	KDM6A	-0.296937	ZNF3	-0.972521	KLRG2	0.188106	BCOR	0.779004	NDUFB3	-0.234201	CTBP1	-0.115362	SLC7A1	-0.929481	MYO7A	-1.54281	CXCL2	0.688	PPP6R3	-0.739488	YPEL2	-0.246441	SLAMF1	0.113325	GANAB	-0.122053	C3orf33	0.81459	PIK3AP1	-0.18009	LDHC	0.278186	SPACA3	-0.0424004	SELRC1	-0.468137	11q23	0.343205	AL833096	-0.325
UROD	0.254	NF2	-0.141	RNVU1-18	1.04282	NXF1	-0.257392	STK32A	1.0725	SPINLW1	0.265064	CASP7	0.453052	SRRT	0.198814	CRYM	-0.21228	PNPLA2	-0.538241	SPP1	3.20307	ZDHHC3	0.486	EIF4G3	-0.646082	NOG	-0.768289	MRPL42P5	0.179631	CENPO	-0.116989	RGS11	-1.06067	FAM50B	-0.11457	MYEF2	0.151564	MRPL55	-0.0882833	linc-RIPK2	-0.989886	AY366508	0.343205	CH25H	-0.496
AJAP1	0.179	NDUFA7	0.312	NOP56	0.306023	ACAD9	0.273319	SLC2A11	1.21645	GMEB1	-0.32899	PRMT2	0.668627	G3BP2	-0.487041	CMPK1	-0.131101	TRANK1	-0.470143	TEX33	2.13184	MCM10	1.35	SLC35D1	-0.701752	PIGA	-0.260797	FTSJ3	0.0925784	CLCN6	-0.100865	MIRLET7A1	-0.652737	WDR73	-0.103114	TMEM161B-AS1	0.188824	PRCP	0.0407035	INPP5F	-0.632285	X64981	0.343205	10q23	-0.496
SERF2	0.48	RAB31	0.355	TOP3A	0.161498	FBLN5	-0.344824	ZBTB11	1.06574	ELP4	0.659691	CNIH2	0.441098	PCGF2	0.213598	B4GALT6	-0.138142	PGF	0.496383	LINC01550	1.65858	FADS3	0.725	LOC285812	-0.858675	MRPS10	-0.260157	KIF19	0.272524	MRPL3	-0.125835	PTPRS	0.596309	DKC1	-0.1256	EPHX3	0.143786	MKS1	-0.0459284	ARL4D	-0.88433	OR10D1P	0.343205	AF059214	-0.496
CDK13	-0.317	IER5	0.539	OSBP2	1.40105	FCGR3B	0.278239	ZNF135	-1.1735	GABARAPL1	-0.17717	KIAA1239	1.37093	OAT	-0.245516	UGP2	-0.182559	CD34	-0.394917	PCDHGA1	-2.00653	AGPAT1	0.569	LOC101928728	-0.553632	CTBP1	-0.22999	ABHD2	0.118993	PANX1	-0.17216	CCDC160	0.630711	MT1G	0.378746	FAM149A	-0.304248	KCTD3	0.0462716	CEP68	-0.305587	AF190748	0.4464	CTSLL2	-0.313
FCGR2A	0.398	MBNL2	-0.306	FAM83A-AS1	0.280448	NME8	-0.308699	CTTN	0.562566	SMYD3	0.477049	E2F3	-1.0151	TM9SF2	-0.373746	CD274	-0.383126	TP53	1.5039	KDSR	2.96606	MOP-1	-1.41	CEPT1	-1.22513	CORO1C	-0.27982	ALDH18A1	0.0668869	ALOX5AP	-0.217015	OR10H3	0.646729	GOLPH3	-0.06385	ESR2	-0.161863	LYZL6	-0.0717766	LSM11	-0.738347	GAFA1	0.4464	10q	-0.313
NUS1	0.135	SLC12A2	-0.278	SNORD100	0.257002	TTF1	-0.246312	SSH1	1.49846	GAP43	-0.323748	RICH2	0.982879	ATP2B2	-0.538775	CENPH	0.158122	GPX7	0.684929	BAGE	2.80258	SIN3A	-0.918	STX17	-0.549894	DLG1	-0.215133	TXNDC16	0.0840455	MT1M	0.380229	MEN1	0.441165	PRDM16	0.144514	ZNF436-AS1	0.301963	MGC32020	0.0700849	KCNA1	-1.05496	FCER1A	-0.5103	LOC100506188	-0.341
NBPF1	-0.154	MDH1B	0.192	NDUFB4	-0.1757	NEXN	0.524673	DCN	-2.192	LOC100128675	0.179196	PRDM15	1.02968	SORL1	-0.253692	LRRC46	0.116235	PASK	-0.503018	PPM1K	2.95309	FLVCR2	0.675	YPEL1	-0.715184	RBM45	-0.21398	CASP5	-0.188633	TP53BP2	0.204433	TTTY1B	0.491147	ARHGAP25	-0.177749	LOC642852	0.133756	FGA	-0.0560657	NR4A2	-0.826331	1q23	-0.5103	ADAMTS1	-0.523
THAP4	-0.133	KMT2C	-0.297	GADD45B	1.0673	CARD11	-0.312459	ZNF829	-0.907838	C1QL4	0.148921	ICAM2	0.248325	MCTS1	-0.36143	UPF3A	-0.124343	SLC6A11	-0.386409	AFF3	2.35427	TMEM56	2.27	MGEA5	-0.699548	NDST1	0.365086	MGC34796	-0.130957	PIGB	-0.145944	LINC00173	0.686066	BLNK	-0.216045	PTCHD1	0.132936	C16orf34	0.0480231	STOM	0.550662	X06948	-0.5103	BC036515	-0.523
HNRNPR	-0.234	DRD3	-0.136	C5orf22	0.180475	SNRPD3	0.233793	MYCN	-0.441899	ZNF474	0.107689	AHR	1.4166	USP14	-0.277873	TMUB2	-0.110849	RFPL1	-1.09216	GNG12	2.36067	TP63	1.46	WNK1	-1.15815	ZNF260	-0.275927	ZBTB37	0.198086	CLEC7A	-0.182073	ACYP2	0.80582	CRHBP	-0.25722	UBE3A	-0.17904	DHODH	0.0355059	DPP4	-0.900243	GPR146	0.52256	LOC645177	-0.313
KIAA1683	-0.277	GNG8	0.242	UBB	0.556255	TMEM150B	-0.252071	LINC00690	1.48677	SLC39A10	-0.56979	TRIM77	0.378314	CLASP2	-0.250708	LINC00238	0.154823	DYRK2	-1.0065	PPARGC1B	2.48394	FAM53B	-1.47	SESTD1	-0.607029	LZTFL1	-0.370001	CHKA	0.0780633	AKR1C1	-0.217896	HSD17B2	-1.17799	SLAIN2	0.0834889	EDNRB	-0.352232	GTDC1	-0.0478807	RAB3B	-0.84727	BC014241	0.52256	RPL13AP5	-0.411
MIR1468	-0.133	SGK2	0.129	WDR66	0.229395	IL9	0.326547	DSC3	0.687148	LDHA	-0.20129	DEFB136	0.611069	UBE2E3	-0.336958	EMC1	-0.107791	NTRK3	-0.762065	GCNT4	-2.3232	NUDT4	1.17	USP34	-0.918282	NAA15	-0.46556	CD53	-0.162956	C1orf123	-0.126262	SNX11	-0.608239	GJB6	0.501875	MAGEA11	-0.166605	EPM2A	0.0534404	RBMS2	0.503084	AK095012	0.52256	RPL13A	-0.411
GBA	0.199	CCDC125	0.189	ANOS1	0.161187	TUB	-0.197155	COL21A1	-1.9891	C2orf18	0.446967	NGDN	0.408957	TRAF3IP2	0.229634	RBFOX3	-0.188455	RAB1A	-1.42109	LRRD1	2.68852	AP2M1	0.559	LYRM9	-0.779424	ALDH6A1	-0.352879	POLR2L	-0.093545	CTSS	-0.197462	VAT1	-0.565203	WFS1	0.145856	HNRNPLL	0.261309	CCDC68	-0.0658104	TUSC3	-0.676899	LOC100130456	0.52256	RPL13AP20	-0.411
CITED2	0.494	SERTAD1	0.524	LGALS4	0.183967	POGZ	-0.225311	COL6A3	-2.79696	DEFB134	0.148108	LIN37	-0.434035	RAB1A	-0.310295	BANK1	-0.323353	HAAO	-0.403504	DIRAS3	3.46489	APCDD1	0.781	SELP	-1.22333	TNFRSF17	-0.825699	SMIM7	-0.0762809	AIP	-0.107275	SCN5A	-0.576785	LAGE3	-0.120256	GFAP	0.159147	PRDM14	0.0370471	TMEM155	-1.1332	DOK4	0.306982	RPL13AP6	-0.411
SLC35A2	0.231	LGALS4	0.163	CISD1	-0.441161	FAM198B	0.422309	DLL4	-0.822289	OR2T2	0.253744	COX6C	0.290663	MAPKAPK2	0.218392	GDI1	-0.088107	SLC29A1	-0.344955	SORBS2	1.38567	DCUN1D4	1.29	UVSSA	-0.723464	RPP40	-0.216321	PBX4	0.138039	MT1X	0.308615	LYST	-0.684803	NUDT7	0.158474	ZNF826P	-0.438384	SMOX	0.0356502	DRD5	-1.22104	16q21	0.306982	BC001675	-0.411
CTNNBIP1	-0.125	PNKD	0.561	PDS5B	-0.222692	CYB561D1	-0.274358	CASC15	1.18425	TRAF1	0.244352	IQGAP2	0.36694	SLC7A10	0.279375	LRRC3DN	0.121434	TNR	-1.12996	H1FNT	-2.05591	VIL1	0.859	GOLGA8N	-0.73023	SRSF10	-0.333404	CEP162	0.111281	MT1DP	0.165338	GUCY1A2	-1.29488	DUSP1	-0.306485	NKX6-3	0.182291	REEP1	0.030487	NPSR1-AS1	-1.21896	BC003541	0.306982	C1QC	-0.457
COL12A1	-0.149	AJAP1	0.205	PACRGL	0.179471	ZNF14	0.231524	PDE6B	0.925256	MFSD6	-0.229934	DIAPH1	0.996033	RFK	-0.332147	EEF1A2	-0.143628	ECM2	-0.934038	INMT	-2.00351	CYP1B1	1.62	TGFBR1	-0.933753	NRCAM	-0.45821	MYO9A	0.0686381	APBB1IP	-0.223193	FMO3	-0.549796	PCDHA8	-0.111252	ZC3H15	-0.178535	ZNF219	0.0255557	ELAVL2	-0.908151	RUNDC1	0.489952	AK226152	-0.457
GADD45B	0.836	DRC7	0.207	CCNH	0.281405	HLA-DRB1	1.00484	RAD52	0.692821	AS3MT	0.63694	SFRS13A	0.803029	GLB1L2	0.172608	MYCBP2	-0.0919883	SLC6A12	-0.708825	KREMEN1	2.65397	PFN2	1.1	TAF9B	-0.874361	SLC25A46	-0.359868	ZNF433	0.133886	PEPD	-0.139599	FGB	-0.579566	TCF7L2	0.172029	GAB2	0.131335	FHL5	-0.0403248	UBL4A	-0.516636	AY189284	0.489952	PPP1R12B	-0.323
SQRDL	0.296	DNAAF5	0.151	TAGAP	0.27893	HVCN1	0.279017	TCP11L2	0.57934	ZNF785	0.245923	SEL1L	0.311558	NETO2	-0.380249	USP5	-0.123055	DEPDC5	-0.490448	MLANA	2.07546	DLGAP5	1.54	NBR1	-0.999041	RAB28	-0.265531	HLA-DRB3	-0.19139	PDIA6	-0.117675	QPCT	-0.613943	PDE7A	-0.139019	LOC100996756	-0.177922	CSAD	-0.310141	FEZF2	-0.849882	OR9G4	-0.416564	AF324888	-0.323
SOCS3	0.257	HLA-A	0.318	SNHG1	0.71372	FAM189A1	-0.22176	TNC	-1.49296	SHOX	0.184885	SLC6A8	-0.616637	WDTC1	0.164818	MRPL45	-0.152904	CCS	-0.38222	MIR663AHG	-2.58764	KCTD18	-0.994	ZNF550	-0.543912	PAIP1	-0.382451	TMEM245	0.0755305	ERCC1	-0.101102	NSG1	-0.562466	ALDH1L1	0.249168	MIPOL1	-0.159945	DAO	-0.0420555	DYNLT1	0.375373	A2M	-0.358516	BC144699	-0.323
SLC36A4	-0.118	EPB41L3	0.497	PATE1	-0.14272	PDE2A	0.219662	TRAF4	0.378736	SPP1	-0.959721	LYRM7	0.980497	TMEM70	-0.390126	ASIC3	-0.116504	AP4M1	-0.659205	RHBDL2	-2.16683	UHRF1	1.09	SETD6	-0.983619	MAPK14	0.299627	CA12	0.196536	ANAPC13	-0.14624	MAP2	0.652652	WDR4	-0.110034	UBE2E2	-0.16337	RPL38	0.0449576	ATP6V0D1	-0.645627	BC040071	-0.358516	AB003062	-0.323
MIR595	0.139	GVINP1	-0.473	BNIP3L	0.58987	ZNF557	-0.505504	S100A7A	1.20072	OR1N1	0.151166	UBIAD1	0.480501	GABARAPL2	-0.220067	APOO	-0.168147	PPFIA4	-0.303602	PDGFD	-2.7233	OPLAH	0.598	ZNF518A	-0.943543	FEM1A	-0.190071	CCNA2	0.128722	ELP5	-0.139601	FIRRE	0.723833	PTPN6	-0.128637	GPAT3	0.285743	ZNF274	0.0508124	DUSP6	-0.651695	C1orf89	0.343255	HERV-V2	-0.303
USP1	-0.207	IL9	0.209	TM7SF2	0.239462	IL15	-0.206868	STX1B	-0.717667	MAP4	-0.648723	SPRYD3	0.893209	RAMP1	0.257265	SV2A	-0.117288	LARS2	0.348072	ECM2	1.40762	LTK	0.701	SRRM2	-0.980382	EPC1	-0.302777	MBNL1	0.138215	RGS1	-0.414897	PMCHL1	0.621689	CTCF	-0.0728734	FAM26D	0.152471	CCDC14	-0.0441833	RP11-434B12.1	-0.78536	BC002946	0.343255	LOC100506072	-0.338
KIAA0930	0.269	FAM206A	0.282	AMD1	-0.428669	C21orf59	-0.209956	TENM3	1.0397	RANBP3	0.367017	IRF9	1.58959	BECN1	-0.369954	GOT1	-0.176817	TYK2	-0.283275	LINC00354	2.19893	GNAS	0.501	METTL14	-0.560189	ZNF559	-0.322276	ZNF766	0.135451	ADGRG6	-0.122034	MIR372	-0.623489	MT1B	0.157717	TOX3	-0.311682	SENP5	0.050637	COL6A6	-1.39462	C1orf134	0.343255	mucin-19-like	-0.338
GALNTL6	0.129	CFAP69	0.17	CYB561	0.301362	MARCH6	-0.429311	SLC44A1	1.34796	RPS26	-0.229028	METT5D1	1.23911	NRXN1	-0.420838	CA11	-0.2469	DNAJB4	0.823834	SLC6A6	-2.12674	RHBDF2	0.552	LOC153684	-0.607072	CDCA7L	-0.414851	KDM1B	0.151223	KAT5	-0.141031	AQP1	-1.13044	VMA21	-0.0814586	FES	-0.172611	ATXN3	-0.0493821	GRIK3	-0.672166	UPB1	0.296553	TMEM78	-0.361
PLK2	0.126	FAM63B	-0.323	STYK1	-0.17713	FUCA2	0.298266	POFUT2	0.512966	TMEM67	0.676072	NCAM2	0.39828	IVNS1ABP	-0.356536	RABL3	-0.146176	TIMM8A	1.11278	GGTLC2	1.97226	SELT	0.636	SNRPA1	-1.13934	TMEM72	0.198339	MANBA	0.070617	SORL1	-0.102914	MIR591	-0.665186	TIMP3	0.227406	TTC39C	-0.172961	IFNA10	-0.0395158	CLCF1	1.85906	AK024277	0.296553	AK097487	-0.361
CREB1	-0.293	MVP	0.379	SPAG16	0.150274	CENPV	-0.247494	FAM122B	0.698462	ENPP2	-0.841009	CADPS2	0.311094	LDHA	-0.369964	SYP	-0.146445	TSC22D2	0.438159	SLC1A2	3.39403	KLK10	0.726	VPS13D	-0.616145	HNRNPA1	-0.322587	AP5M1	0.0812405	IGSF6	-0.13671	PRKACG	0.743997	PTGS1	-0.140802	VWA8	0.23365	DUSP4	0.0338969	GPR12	-0.717151	SH3GLB1	0.333454	FGL2	-0.415
TOX2	-0.345	MYBL1	-0.563	PFKP	0.40145	HP	-0.63743	CHCHD2	-1.80259	DCAF8	-0.400281	TMPPE	-0.837446	PJA2	-0.35644	TCTEX1D1	-0.21938	KDSR	0.489385	LAMB2	-2.89751	LAMA4	0.937	KIAA0907	-0.894097	BUB3	-0.261762	ARPC1B	-0.129508	GSTM1	0.291604	MYCN	-0.744248	JTB	-0.121448	NSD1	-0.150617	MGC33302	0.059109	SYT1	-1.08103	1p22	0.333454	BC033820	-0.415
CMAHP	0.202	ABCC12	0.125	ARSB	0.216994	CES1	0.66151	COL16A1	-0.920733	C8orf58	0.369771	PARP8	0.808282	MORF4L1	-0.201576	PRMT8	-0.192478	IRF5	-0.617407	SLC35G3	2.08252	SLC12A9	0.615	FGFR1OP2	-1.24053	CIRBP	-0.236993	LYVE1	-0.216358	PDHB	-0.120453	BEST4	0.989298	RCC2	-0.0852401	SRGAP3	0.172619	RPS19	0.0482959	RGS4	-1.31228	AF350371	0.333454	PPPDE1	-0.315
DAP	0.282	FOXP2	-0.181	DNAJB12	0.235968	ASMTL	0.211127	EFCAB6	1.34134	NAPEPLD	-0.528526	NELL1	-0.394426	SMYD2	-0.358525	C8orf34	-0.372864	CCNG1	0.970342	MYOZ3	-2.05192	IER5L	0.647	ATG16L1	-0.940102	PDE7A	-0.312248	DHX29	0.0535678	BLNK	-0.184705	LINC01256	-0.833712	GSTM4	0.119884	KRTAP17-1	-0.402561	GFM2	0.0436829	PPM1E	-0.770982	TGM3	0.446841	1q44	-0.315
ERMN	0.0962	PKP2	0.151	SLC25A48	0.206165	ACCS	-0.769099	FRZB	-1.62078	PAQR6	0.192749	PTPRO	1.11204	B3GALT2	-0.350546	PRDX3	-0.18131	CYP19A1	1.16848	LRFN5	-2.86722	TAF10	0.56	DTD1	0.401115	SATB1	-0.38683	SLU7	0.07347	UFC1	-0.118838	NOS1AP	-0.581173	AOAH	-0.265878	CALN1	-0.16406	CRKRS	0.0530985	GABRG3	-0.604824	AK290324	0.446841	ZFP36	-0.466
TIMM23	0.217	RAB25	0.161	SLC30A5	-0.281147	WASH7P	0.245767	F12	0.723301	PI4K2A	-0.35779	SYNCRIP	-1.70412	MRPS30	-0.269538	ZNF653	-0.128712	DEFA4	-0.845485	ZNF844	-2.00655	TRA@	-0.654	GON4L	-0.783623	MAN1C1	-0.253689	WNT11	0.190144	TAGAP	-0.138891	LRRC52	0.556086	RELN	-0.424048	ACRV1	-0.138845	FLJ10815	0.0328312	NCALD	-0.834685	AK291605	0.365094	M92843	-0.466
PATE1	-0.107	COMMD7	0.401	TSTA3	0.411566	PCM1	-0.358509	HGF	-2.14678	EYA2	0.149412	MTHFD2L	1.49545	RARG	0.196112	DCLK1	-0.407951	RAB9BP1	1.54605	PLAUR	-2.8371	SRD5A2	0.621	GABBR2	0.339294	UTP4	-0.290181	VSTM4	0.123138	ERAP1	-0.139057	CACTIN	0.676702	GPR75	0.17663	NEMF	0.204692	FLJ12949	0.0600485	DCLK1	-0.768834	FAM115A	0.365094	AK124483	-0.32
PNKD	0.43	FOSL1	0.154	SLC41A2	-0.176896	TMEM243	-0.234235	NEBL	1.7345	KLRA1	0.41871	HSPD1	-0.338163	BTBD1	-0.290071	KRT77	0.11936	BFSP2	-0.959434	DNALI1	-1.84938	ASPSCR1	0.925	PLP2	0.401594	C14orf169	-0.232991	THOC2	0.112466	PSMC3	-0.105566	DSCAM	0.662424	IGSF6	-0.201289	FGD6	-0.25659	TEP1	0.0373121	RP11-236B18.3	0.793241	7q35	0.365094	LOC100131242	-0.32
FLAD1	0.263	LHFPL1	0.182	COL12A1	-0.168192	CEP78	-0.423207	ITPRIPL2	0.91981	MRPL20	-0.310435	RTN3	-0.142745	EIF1B	-0.28311	HIST1H4L	0.139808	ARFIP1	0.784226	HHIPL1	-2.71512	GGH	0.957	KIAA0368	-0.64838	ILKAP	-0.209567	LPIN1	0.0572321	SRD5A3	-0.159576	PDHA2	-0.697605	CMKLR1	-0.141316	RALGPS1	0.123664	SLC31A1	0.102931	PLCXD2	-0.85127	BC000609	0.365094	RPS19	-0.287
GNAI3	-0.357	ACRBP	0.772	ERGIC2	-0.320977	ANXA2R	-0.451797	HAVCR1P1	1.02617	NDRG3	-0.181566	LRTOMT	0.724504	C1D	-0.380165	PIH1D1	-0.133455	IL4	0.697086	LOC145845	-1.92908	PLBD2	0.737	RHOH	-1.22068	RAB27A	0.25305	DGKG	0.110491	HLA-DPA1	-0.404051	APAF1	-0.867977	RND3	-0.263757	HHLA3	-0.150242	SECTM1	0.0340406	CLDND2	0.873743	AK299911	0.365094	CD74	-0.435
ZNF22	-0.27	GMCL1	-0.303	ZNF830	-0.314645	DNAJC25-GNG10	0.286237	LCMT1-AS2	0.931074	TTTY13	0.148998	KIAA2026	-1.26141	GLRX2	-0.288292	AOAH	-0.211188	ADH7	1.38116	MIPOL1	-2.20894	CCND3	0.673	SCN2A	0.436336	C11orf1	-0.288615	C18orf54	0.196262	TRIB2	-0.164881	OTOF	-0.552889	TIMM8B	-0.170112	DLEU2	-0.182361	SRCRB4D	-0.0456941	AP2M1	-0.564285	AK294312	0.365094	5q32	-0.435
ANKRD13A	0.27	PLAGL1	0.244	SNORD62B	0.246685	GSDMB	-0.443791	N4BP2L1	-1.36158	F2RL3	0.315172	ZDHHC15	0.70211	TSPYL5	-0.310353	AQP7	-0.202417	LAMB1	-1.0171	FLJ34503	1.58631	PTPN23	0.983	RNASET2	-0.734746	ZNF614	-0.356059	ADCY3	0.0630313	NXPH1	-0.145998	ANKEF1	-0.77987	SLC1A2	0.377161	LINC00463	-0.140885	PON2	0.0532563	IFNG-AS1	-1.1603	AK001640	0.365094	BC018726	-0.435
MICU1	0.225	TEX19	-0.174	RNU1-3	0.857455	MEFV	0.372735	GAB1	-0.396119	ZNF461	0.293329	FN3KRP	0.742063	YME1L1	-0.429912	ARG2	-0.195773	KIF20B	-0.871868	HAB1	2.2087	ABCA11P	0.629	VPS13C	-0.850073	HIBADH	-0.388528	ZNF583	0.112081	ARHGAP25	-0.116671	PRG2	-0.877784	LINC00260	0.216049	LOC101927272	-0.185945	CPM	-0.0319421	HS3ST2	-1.44778	LOC100508781	0.365094	LOC100506897	-0.303
ENO1	0.334	ZNF22	-0.327	BBOF1	0.336159	TDRD1	-0.396038	SCARA3	-0.455891	MTCH1	-0.160397	FAM3A	0.705381	ATXN10	-0.277192	MRPL21	-0.165867	RPS6KA1	-0.374688	HMG20B	2.94571	DCTN2	0.659	LOC100127972	-1.05526	DAP3	0.52665	C1orf87	0.15753	DPH3	-0.10826	GATSL2	-0.74742	NDNF	-0.142933	SPATA22	0.25418	SPHAR	-0.05223	APBA2	-0.529169	ITGA1	0.417257	CYP2E1	-0.33
SNORA33	0.36	SEMA4A	0.471	NUS1	0.171042	ADAMTS1	-0.298212	GGTA1P	-1.04414	FNDC5	-0.623559	LOC100287942	0.512787	REEP1	-0.410666	TMEM55A	-0.111317	PARVB	-0.383523	JAKMIP2	2.34571	MAMDC4	0.987	DNAJC7	-0.920691	CSTF1	-0.212646	TEKT3	0.132118	SYK	-0.139352	PPIL3	-0.999116	CXorf21	-0.155175	SNAP25	0.164143	HP	-0.0628097	PCDHAC1	-0.562206	PELO	0.417257	AK127288	-0.344
VHL	-0.313	SOCS1	0.313	KLF3	-0.278121	KCNK1	-0.229345	RECK	-0.674144	ZNF883	0.768214	OLFML1	0.484728	LAS1L	0.20018	TMEM19	-0.173511	IL1RN	-1.372	RPL13AP17	1.89204	GFRA3	0.716	SSX2IP	-0.736852	TPPP3	-0.359537	PRIM2	0.174467	PTGS1	-0.102864	CAMK2B	0.906779	CLEC10A	0.0942445	ATP6V1A	0.133604	CDR1	-0.0606884	ARHGAP20	-0.677264	BC137121	0.417257	LOC440896	-0.344
ANKHD1	0.207	OR2S2	0.244	HKDC1	0.224725	RUFY1	0.500939	TRIM42	-0.644899	ITGA5	0.146161	GNLY	0.504281	MT1HL1	0.347204	ANP32D	0.154509	TRBC1	-0.756099	PACS2	2.69892	CELF6	0.808	EHD3	-1.11964	FAAP20	-0.424555	TDH	0.154683	TLR3	-0.147206	FGF6	-0.616471	FOS	-0.486118	ZNF439	-0.16686	LYZL4	-0.0395735	RUNX3	0.739143	AY117399	0.417257	CMKLR1	-0.418
KIAA1191	0.235	MTMR12	0.221	SERPINI1	0.178204	P2RY6	0.193032	DRP2	0.845324	ADCY2	-0.597584	CTXN2	0.553808	CHMP5	-0.328232	GPX4	-0.12808	LINC01565	0.706808	SCNN1G	3.38608	UBE2M	0.516	GTF2A2	-0.787206	CKMT2-AS1	-0.342581	ZNF8	0.137666	SLC27A4	-0.0878236	PCDHGC3	0.708091	TP53BP2	0.309018	LOC101926975	-0.141543	ZNF445	-0.0457209	GOT1	-0.77379	TMC7	0.473418	RPS4Y1	-0.313
BCL11A	-0.437	PQLC1	0.295	KHDC3L	0.162912	LYPLA1	0.35088	ZMYM5	0.406428	GALNT5	0.121207	ZNF83	1.34095	RANBP2	-0.398779	ANAPC13	-0.181797	CCL4	-1.31492	C1orf158	-1.63913	ZNF165	0.755	ANKRD36B	-1.10559	DTD2	-0.340516	MRPL58	-0.0634367	U2AF1L4	-0.176377	RASA4CP	0.764703	GPKOW	-0.0714117	TRIM4	0.182292	OPCML	-0.0590171	SULF1	-0.960678	BC036205	0.473418	XGPY2	-0.313
PDS5B	-0.218	MIR495	0.188	RNU1-1	0.780375	ZNF585B	-0.245158	NEK8	0.59128	Septin 9	-0.527906	KBTBD3	1.00848	RPS4X	0.135928	SLC26A8	-0.272313	NOVA2	-0.413722	HBBP1	1.79858	MAX	-1.56	ZNF234	-0.45532	TRPM7	-0.343641	ALOX5AP	-0.252684	CSPG4P5	0.138181	ARFGAP3	0.487971	GFRA1	0.178959	OGFOD1	0.123903	MRPS5	0.0544361	REEP1	-0.754395	KRTAP26-1	-0.534682	XG	-0.313
OTUD6B	-0.14	ATP2B1	-0.295	ALAS2	0.611277	SMAP2	0.30286	FBLN1	-0.937468	TSC22D2	0.236266	C11orf24	0.64489	SDS	0.308744	SNORD115-31	0.193681	SCAI	-0.65495	ZNF775	-2.91551	RORA	-1.46	LOC101927330	-0.486961	NT5E	-0.460318	BBIP1	0.19983	PNOC	-0.106382	C5orf58	-0.599163	EMX2	0.23326	TMEM41A	-0.1499	PDE5A	0.0664652	OXCT1	-0.55763	KRTAP27-1	-0.534682	AK222594	-0.313
COMMD7	0.327	ZNF618	0.15	SRRD	0.299869	CRTC2	0.303466	DMD	0.804406	SLC22A7	0.1521	SMARCC2	-0.870282	RSL24D1	-0.498318	TMEM163	-0.185745	ADAM8	0.387285	TM6SF2	-2.11396	MYOM3	-0.563	ENDOD1	-1.13718	UBN2	-0.301163	NR2F2	-0.149916	PEF1	-0.103506	LOC100133920	0.546731	CD4	-0.175273	ZNRF1	0.299526	SNX6	-0.070276	SLCO4C1	-0.851959	BC057825	-0.534682	Z48519	-0.313
TIA1	-0.224	ARHGAP44	0.158	NME3	0.284899	MBD4	-0.567957	POMZP3	0.644362	PDLIM2	0.107712	STXBP5L	0.816243	RCAN2	-0.371755	LIN52	-0.121449	SSFA2	0.486308	GRIN2D	-3.05938	ACTA2	0.892	ZNF226	-0.52985	YWHAZ	-0.23299	CDH15	0.165832	HSBP1	-0.111749	NUTM2A	-0.669199	ZNF33A	-0.157597	C5orf22	0.192272	DPF1	0.0624676	PODXL2	-0.624097	AB096937	-0.534682	JUNB	-0.535
CETN2	0.239	LAMTOR1	0.529	RHD	0.185723	PTAR1	-0.2173	INHBA	-1.46431	GPKOW	-0.57364	MUT	-0.699542	RPRD1A	-0.441716	TRHDE	-0.168265	LYZL6	-0.830353	OR51E2	-3.34096	TSPAN7	1.35	TTC39B	-0.546245	PDHA1	-0.295794	RANBP17	0.128261	RCBTB2	-0.177556	BCL2L14	0.717606	CD69	-0.275009	ITPRIPL2	-0.120193	PTTG1	0.028502	TTPAL	-0.431376	MC2R	0.317244	BC004250	-0.535
PURA	-0.26	NCF4	0.368	SPRY4	-0.160063	SPDYE8P	-0.230518	NEFH	-0.555916	UBA1	-0.25799	WDR60	1.01687	PNMA1	-0.365245	MAK16	-0.167444	GRPEL1	1.20636	DYNC1H1	2.09482	ADH6	0.925	EXD2	0.445198	TCEANC	-0.238553	ATG7	0.0625355	SPATS2L	-0.112525	NRK	1.18082	GTF3C2	-0.0949632	LECT2	0.148772	GPATC3	0.127074	PROKR2	-0.920853	BC094710	0.317244	HLA-DRA	-0.436
DNAJB12	0.181	VCPKMT	-0.398	NR4A1	-0.18142	WDR45B	0.224121	MDM2	0.991076	TMSB4X	-0.257596	CAP2	-0.286994	ATP6V1A	-0.34262	TMEM126A	-0.203829	PRPH	-0.348164	KDELR3	-2.65107	RNF11	1.36	SRSF11	-1.01963	FUT8	-0.304944	MGME1	0.104135	CXorf21	-0.117042	ABHD11	-0.514738	WDR45	-0.0909208	ZNF350	-0.160112	ERVWE1	-0.036451	TLN2	-0.470377	AK095259	-0.345791	BC032350	-0.436
SLC25A36	-0.208	C4orf19	0.174	DYNLRB1	0.296495	SLC4A7	-0.337975	SDCBP2-AS1	0.528841	RAN	-0.293352	BAT1	1.43803	FAM98A	-0.235119	KCNMB1	-0.125005	BIRC3	0.527227	ZNF503-AS1	-2.59128	NDRG4	0.773	EZH1	0.368401	ZNF271P	-0.250187	DFFB	0.17219	GRAMD1C	0.292107	C1orf64	0.664079	SORL1	-0.131273	DEDD	-0.151676	FGF17	0.0697132	LCNL1	0.680521	LOC439938	-0.345791	BC071659	-0.436
ENPP1	-0.153	CREB1	-0.362	FOXN1	0.140244	LILRB1	0.394064	PTPN3	0.525368	PNMA2	-0.224014	KIAA1529	0.511375	CSE1L	-0.288046	MBTPS1	-0.0972273	MAST4	-0.417496	PLA2G12B	-1.70561	ABCG5	0.887	NUP58	-0.990076	ZBTB41	-0.328708	FANCG	0.0686038	MRPL46	-0.170828	ATAD3C	-0.725211	GCNT2	-0.14828	SOX6	0.161014	C2orf29	0.0448971	SNORD112	-0.873741	RPL36AL	0.414945	AK301134	-0.436
NRF1	-0.102	TUBA1B	0.427	DNAAF5	-0.31205	MYO7B	-0.216407	C4orf47	1.42456	C19orf61	0.257549	C16orf5	0.717602	TMEM14A	-0.331854	SPRED2	-0.215236	TOP3B	0.561073	ERVH-6	1.91123	CHST13	0.686	IKBIP	0.622723	POP7	-0.19309	CFTR	0.210276	C14orf119	-0.13544	FAM223A	-0.650945	SULF1	-0.169404	BCL11B	-0.152479	ATG10	0.0321796	AP3M2	-0.515795	14q21	0.414945	AK297032	-0.436
FAM107B	-0.314	LCE5A	-0.172	PLPPR3	-0.142597	BID	0.427562	KRR1	0.264308	TMEM72	0.143354	HERC3	0.762548	FBRS	0.235911	RNU6-501P	0.147391	TRIP13	-0.363246	GABARAPL1	-2.35179	BTG3	0.969	ZNF207	-0.928354	WDR3	-0.253652	MTM1	0.110166	PDCL3	-0.160227	ASAP1-IT1	-0.980943	FADS3	0.11113	ARFGEF2	0.194042	MAP2K1	0.0551992	GPR176	-0.864165	BC107716	0.414945	CR457013	-0.436
TCTA	0.157	ONECUT2	-0.113	SLC14A1	0.52836	ZFP36L1	-0.436563	ZNF652	0.607005	DOK1	0.186781	KIRREL3	1.05736	EDN1	0.336085	LINC00687	0.143763	SYK	-0.841372	SNCA	2.26208	KCTD11	1.35	RAD51-AS1	-0.449779	FGFR1OP2	-0.298489	FAM81B	0.167441	RCSD1	-0.0833514	WFDC12	-0.615098	CARMIL1	0.256244	LINC00540	-0.352013	CTDSPL2	0.0289284	EPDR1	-0.753241	HABP4	0.298641	M60334	-0.436
SNHG1	0.538	ETFA	0.267	RASL11B	0.198578	ZFY	0.425418	P4HA1	-1.16684	RBPMS	0.226677	LYN	0.516723	EIF4G2	-0.212021	LINC00467	0.165385	MRPL28	-0.259548	PTGES	-1.38354	PRKD2	0.547	PTPN9	-0.631193	EMG1	-0.2246	LOC100287869	0.053239	ITGAX	-0.116522	POTED	-0.475782	PAPPA-AS1	0.180031	WDFY2	0.135753	SLC5A6	0.0368233	TMEM100	0.684652	AF241831	0.298641	AK301354	-0.436
INTS6	-0.264	CRYBA2	-0.177	TMEM107	0.503411	GNG10	0.361541	ORMDL1	-0.371446	C11orf10	-0.534531	TRIM29	0.840499	SEC23A	-0.503115	ANXA6	-0.0973457	GIPR	-0.419556	CCRL2	2.82874	CSGALNACT1	-0.908	MYO18B	0.387189	PMM2	-0.350359	MTG2	-0.110265	PRKAR1A	-0.0964763	KCNQ1	-0.806815	SLC14A1	0.60346	MUCL1	0.137568	IL6ST	0.0310237	MIR548W	-1.07193	AF064105	0.298641	M60333	-0.436
ARHGEF16	-0.116	RPUSD1	0.332	TBX22	0.16037	FAM63B	-0.198893	SCN4B	-1.9623	RXFP4	0.123746	HDLBP	-1.2432	AKAP11	-0.289253	SLC37A3	-0.134139	AP1G2	-0.462639	ELF5	-3.06654	STAB1	0.977	PROS1	-1.52466	LOC101927609	-0.302323	DAAM1	0.116061	TCTEX1D1	-0.154791	CCS	0.660678	USP4	-0.0788329	MYO1A	0.143698	BAAT	-0.0299612	ATXN7L3B	-0.418422	CDC14B	0.298641	AK301190	-0.436
WDR60	-0.179	APH1B	0.271	ZSWIM7	-0.543281	HKDC1	-0.312753	CFAP70	-1.6543	LGALS8	-0.43432	CLEC1A	0.182922	ACTR3	-0.211345	MEPCE	-0.127886	OGG1	-0.717902	CPVL	-2.94694	SLC41A3	0.475	FBXL16	0.422517	FANCF	-0.243339	LYSMD3	0.0828064	MT2A	0.366484	RPS19BP1	0.429341	BDNF	-0.293869	FAM200A	-0.137686	MRPS10	0.0944075	CES5A	-0.626237	BC001508	0.274712	OR1B1	-0.32
TAGAP	0.205	FAM198B	0.132	TSPYL2	0.36597	FTL	0.351956	ICA1	1.39323	PFN2	-0.144858	MT1A	-0.26452	NPTN	-0.301384	NABP2	-0.118113	SCAMP1	-0.547677	DLG3	1.48394	SYN2	0.584	GPR15	0.886363	LYRM4	-0.377281	MTURN	0.0968787	SMARCAL1	-0.082709	PCDHB4	-0.98629	C3	-0.5051	NRXN3	0.241144	IGF2BP3	0.0529082	ADAMTSL1	-0.726371	C1orf50	0.274712	RGS1	-0.46
LAMTOR1	0.409	AK4	0.187	HOTAIR	0.165879	PGM5P2	0.218652	ZNF585B	-0.298225	PMP22	-0.506688	CASC4	0.647354	MAT2B	-0.300172	CDK5	-0.181971	PPP1R37	-1.03259	YWHAEP7	-1.40057	NID1	0.74	PDE4A	0.430832	MIOX	0.187876	OFD1	0.0874927	ADAM28	-0.252865	SETD7	-0.539534	STK17B	0.330315	RNF180	-0.348939	MTAP	0.0612799	PGM2L1	-1.03833	LOC641298	-0.872777	1q31	-0.46
GADD45G	0.371	EPS8L2	-0.266	ATF3	0.461477	SCAND1	0.312668	LOC102723559	0.50539	AGPAT3	0.276774	EPB41L3	-0.834529	MT1E	0.475592	COPS6	-0.118497	THBS3	-0.877128	SCN3A	-3.20291	MYO9A	-1.05	ARAP3	0.375184	MRPS27	-0.255058	ZNF69	0.153265	GBP4	-0.230531	WFDC2	-0.741524	LGI2	-0.27855	BTBD2	-0.144181	NKX2-5	0.0297183	GS1-358P8.4	-0.832354	LOC100271836	-0.872777	AK093544	-0.46
CDK5RAP2	0.151	TIMM17B	0.245	DAP	0.346174	NFKBIE	0.26991	GXYLT2	-1.01472	CDH19	-0.394428	SHPK	0.847284	EFR3A	-0.38662	CLCN6	-0.106166	TOP2A	0.773655	PBRM1	1.60193	EML3	0.71	SCAF4	-0.864882	WBP11	-0.249866	RCSD1	-0.101854	DCDC1	0.165667	MED23	-0.510125	GPR183	-0.233657	LOC101929681	-0.189487	FIBCD1	0.0405573	RP11-371B4.2	-1.0807	LOC440354	-0.872777	C3AR1	-0.371
KRTAP10-9	-0.113	LCN2	0.518	SELK	0.429649	COL4A2	0.32023	HMG20A	-0.467799	FBXO9	-0.209956	TTTY11	-0.195968	OXR1	-0.623735	TRIM51	0.226041	ACHE	-0.931043	GYPA	-1.60708	CCDC88B	0.551	THBS1	-1.31646	C1orf50	-0.178206	C20orf85	-0.14817	METAP1D	-0.108694	C6orf15	-0.620962	MT1X	0.388555	TFAP2A	0.180441	MLSTD1	-0.0398645	linc-B3GALT2-1	-1.24873	LOC595101	-0.872777	U62027	-0.371
FIS1	0.303	CLEC12B	0.136	MSL3	-0.498102	TNFSF15	-0.425768	HLA-DRB6	0.93292	YIPF5	-0.474421	GREB1	0.450971	IARS2	-0.274634	TCEAL1	-0.122956	ANXA5	0.402798	PPP1R1A	-2.77283	C11orf30	-0.658	KRT6B	0.320623	ABCC4	-0.556719	ELK1	0.146776	APOL2	-0.188065	ZC2HC1C	-0.5957	CCL20	-0.155702	SLITRK5	0.187534	DNAJB6	0.0236915	RIMKLA	-0.827826	SMG1	-0.872777	FTL	-0.408
CECR1	0.175	LYRM7	-0.303	KIAA1143	-0.161151	GPER1	0.40174	ADGRA2	-1.14295	WSB1	0.823773	ATP5F1	1.29917	ATG5	-0.323569	NDUFA9	-0.112655	IGLV1-44	1.15984	TAF7L	2.20236	MMRN1	0.81	RHOQ	-0.693721	PHF20	-0.216925	ARMC3	0.245053	FAM101B	0.105584	PAPPA2	-0.57255	CCDC22	-0.0802108	LOC100507033	0.161935	AGGF1	0.0290353	ATP6V1A	-0.789431	BC063703	-0.872777	BC004245	-0.408
AKR1A1	0.266	FAM71B	-0.166	PDE2A	-0.140179	KBTBD11	0.316283	CR2	1.29669	ABCC8	0.139653	C13orf34	0.839574	GGH	-0.260698	CNR1	-0.295463	FAAH	-0.507497	GS1-600G8.3	-1.89009	INSR	0.609	EPC1	-0.455776	TIAL1	-0.225711	TEX40	-0.107813	MPEG1	-0.156633	PWRN1	-0.642612	SULT1C4	0.229586	TOR3A	-0.168711	PRDM11	-0.0561169	RP11-29H23.5	0.90234	BX640895	-0.872777	AGBL1	-0.355
ZBTB44	-0.231	MIR26A1	0.141	MIR595	0.175834	DMTF1	-0.320575	OGN	-2.27529	CARD8	0.365881	PBX3	0.469046	TCP10L	0.148126	RIPK1	-0.145735	E2F4	-0.398803	ZNF358	-1.71533	NBEA	-0.844	LINC00936	-0.658335	ZNF550	-0.307312	CMKLR1	-0.128051	B3GNT5	-0.252591	OR2V2	-0.664771	LOC100506730	0.139773	BCHE	-0.976454	C21orf67	0.0276715	NAPB	-1.04534	C3orf33	0.269316	AK313998	-0.304
ACCSL	0.109	LOC441601	0.111	NACC2	-0.285468	RBBP8	0.425731	AFF4	0.373	CHRNB4	0.121964	ANKFY1	0.292742	IKBKAP	-0.349461	PPP1CA	-0.122798	DZIP3	-0.417438	GTPBP1	-1.64367	SLPI	1.34	ARGLU1	-0.346794	ZNF252P	-0.252401	LINC00674	0.118798	AKR1C2	-0.206357	CAPN8	-0.733316	KMO	-0.170523	USP25	0.139391	ARL6IP	0.0320719	CERS6	-0.72579	AK289890	0.269316	MLF2	-0.304
SGCD	-0.116	ANAPC16	-0.412	SP110	-0.392103	KCTD17	0.249424	PCDHA10	1.05685	FOXJ2	0.150924	SLC24A5	0.727566	FAM179B	-0.355974	MIR365A	0.153699	IL7	-1.27626	ELOVL2-AS1	-2.98881	CCNI	0.507	KDM4C	0.317357	MAP7	-0.576258	CARMIL1	0.135278	TFEC	-0.147899	CHN2	-0.483297	RPL28	0.0820397	TP53TG5	0.113317	EI24	0.113739	PFKP	-0.75511	ACOT2	0.321956	12p13	-0.304
PWAR5	-0.132	MIR382	-0.193	CDKN1B	0.49793	ATP10B	-0.204242	LINC01333	1.14523	B3GNT5	0.485943	CSRP2BP	1.35006	SNX3	-0.221014	VWC2L	-0.315956	HIPK2	1.11321	LOC101929607	1.27881	PYHIN1	-1.58	SYN2	0.392078	SEH1L	-0.315073	MILR1	-0.190041	TRMT1	-0.0905445	GCSH	-0.740492	TIRAP	-0.0892035	OGFR	0.168306	LCTL	-0.0286358	SLC8A3	-0.477393	BC006335	0.321956	RASGRF1	-0.396
RCVRN	-0.161	TCTA	0.199	PNP	0.566558	HTT	-0.18192	CLU	1.07211	ARHGEF11	-0.637838	AZI2	0.9309	GGTLC1	0.2037	SMIM14	-0.164807	DHX34	0.842996	LIPJ	3.69402	THBS3	0.563	ZNF548	-0.546579	RIOK1	-0.245799	GPRC5D	-0.173589	PAM	-0.173482	PI15	0.83622	ALOX5AP	-0.289425	LOC100996325	-0.186909	ATP6V1C1	0.036883	DNAJC27	-0.356857	ACOT1	0.321956	BC041856	-0.268
PINK1	0.317	CENPI	0.194	KIAA1958	-0.243608	PLCL2	-0.241294	PEAK1	0.655408	IPW	0.495826	ANAPC16	0.728565	PCSK1	-0.578543	OPTN	-0.0901152	MAST1	-0.334591	ABCC3	-1.99222	PGAP2	0.559	HECTD1	-0.633281	PPP2R1B	-0.276888	PSIP1	0.0916492	PPARA	0.129221	ADH1C	-0.836999	TIGD6	-0.109784	DDX42	0.121909	RAB3C	0.0394752	SNORD113	-1.1436	BC127748	0.321956	FLJ39632	-0.268
CFAP69	0.132	TRAF1	0.14	TMEM98	-0.148191	MAP3K7CL	0.742331	PLA2G4E-AS1	1.22929	MMP2	0.141728	ANKRD17	-0.79897	PRPS1	-0.275106	LPCAT4	-0.140344	TFE3	-0.304942	CD244	1.95351	KCTD3	1.23	MAP3K6	0.472823	POLR1B	-0.275594	VPS53	0.120208	SNX17	-0.0954771	ZNF624	-1.22093	SLC7A7	-0.182234	FOXO6	-0.210661	CD34	0.032414	AC096558.1	-1.8607	IL23A	0.289722	AK022914	-0.268
UGGT1	-0.209	GSDMB	-0.405	ERVV-2	0.186653	IRF3	-0.350729	HDAC9	-1.22615	ATAD2B	0.745122	GATA3	0.425056	SERPINI1	-0.357312	ELMO1	-0.244287	CNKSR1	-0.401431	NPY1R	-2.33441	ASB13	-0.724	ATP9A	-0.949334	LSM5	-0.483447	FAM101B	0.133807	WDR45	-0.0897166	HYALP1	0.602862	GPR19	-0.115914	LOC100505498	0.173222	ATP2B4	0.0298769	PLCXD3	-0.700274	AY359083	0.289722	DUXAP10	-0.268
RASD1	0.398	FCGR2A	0.468	ZNF683	0.900677	MIR659	-0.214946	IL23A	1.16194	ARHGAP5	0.236254	MTMR12	-0.58678	ITPR1	-0.484886	RNASEH2B	-0.170279	METTL3	-0.343959	CARD18	-2.2905	GSTZ1	-0.778	HOXB1	0.401282	ZDHHC4	-0.286748	BTBD18	0.122064	HDLBP	-0.0560319	VGLL1	0.922018	CPED1	-0.161226	LOC100505874	-0.143374	GBP7	-0.0399792	RP11-368I23.2	-0.896934	UTP14A	0.294248	MLL3	-0.351
SCARNA12	0.115	BTN2A2	-0.153	TMF1	-0.16314	SLC2A6	0.474197	PAX9	-1.16158	NEK9	0.417442	MLLT6	1.12016	THBS4	0.220621	PPP1R11	-0.132404	TRPV6	-0.927489	CDH26	2.69716	UBE2D2	0.684	RARA	0.815241	RANBP2	-0.256652	UBE2F	-0.0475383	SMIM11A	-0.128289	LOC100133091	-0.592517	STOX1	0.291761	PSEN1	0.141139	NLN	-0.0603444	MCTP2	-0.734053	AK291918	0.294248	AY024361	-0.351
FBXO38	-0.343	UBE2Q2	-0.42	FRMD4B	-0.155802	IQGAP2	-0.325707	ZSWIM7	-1.13494	TMC6	0.13436	OR6M1	0.291284	FGF12	-0.452991	FRMD6	-0.161137	ETFDH	0.354658	MAPK8IP3	1.71971	ACTR1B	0.714	GAB4	0.401578	KIAA0141	-0.275452	MRPL27	-0.0542219	MT1F	0.2031	LOC101929697	-0.678491	TEF	0.112282	PDK4	-0.174806	FNDC8	-0.0373142	HSPA12A	-0.712311	BACE2	0.291666	BTG2	-0.456
DPM2	0.235	ANXA3	0.451	PLXDC2	-0.310242	KLHL28	-0.457154	WDR91	-1.25549	C6orf106	-0.322479	PIK3C2A	-1.59313	VDAC2	-0.222548	SYT4	-0.169828	RARG	-0.580817	SMOX	1.27249	RBM19	-0.642	FBXO21	-0.504591	FYB	0.475383	PMS2	-0.0568855	USP5	-0.120798	EEF1B2	0.532522	ADCYAP1R1	0.145909	TPTE2P5	0.157224	SHC4	0.0386506	MOAP1	-0.761341	AF178532	0.291666	1q32	-0.456
PARD6A	-0.273	PRAMEF9	-0.162	FCN2	0.125093	DCLRE1C	-0.171001	MIRLET7BHG	0.435394	MRPS18B	-0.316746	A4GNT	-0.205224	SUMO3	-0.247647	NT5C3B	-0.117319	PLP2	0.447	BMP7	-3.43434	C21orf89	0.65	TUBB1	-1.17227	PLAG1	-0.330706	MRPS22	-0.0668195	NAGK	-0.122009	MARK4	-0.794393	LINC01296	0.156776	EYA2	-0.780648	SLC38A1	0.0329736	AC003002.6	-0.507909	RPS2	0.57553	U72649	-0.456
DHRS11	0.158	ADD1	-0.374	GNAI3	-0.428862	LOC100996671	0.216036	LOC105369167	1.28818	ACAT2	-0.20754	DEPDC5	0.317555	PSMA4	-0.288334	AKR1C2	-0.347033	SEC14L1	0.337664	CMTM4	-1.95011	RUNDC2A	-0.708	METTL3	-0.660542	SCUBE3	0.224351	FANCA	0.150332	LACE1	-0.100971	GKN2	-0.614422	EFCAB12	0.173255	LOC105376530	-0.147118	ANXA13	-0.0564534	SNORD113-2	-0.90833	SNORA10	0.57553	AK298140	-0.331
MRPL49	0.201	SARS2	0.401	BMP2K	0.2612	DUSP7	0.195809	ANKRD33B	1.00837	GBP6	0.104725	RNASE4	0.298502	CACYBP	-0.2801	SPTSSB	-0.363207	LPA	1.28356	UNC13C	2.24704	GLDC	1.22	EGFLAM-AS2	0.301039	NMT2	-0.423615	ZNF467	0.175061	FOXK1	0.063972	SLC6A1	-0.800123	TFEC	-0.200644	SLC35D3	-0.176164	HMGN2	0.0326944	EGFEM1P	-0.704499	SNORA64	0.57553	LOC728752	-0.331
TMPRSS11B	0.13	GPBAR1	0.609	SCARNA12	0.141718	MDH1B	0.266263	HIST1H2BD	0.412593	MOBKL2B	-0.624672	SMAGP	0.278235	FAM49B	-0.153865	SEPT6	-0.138974	DYNC2LI1	-0.471045	LINC01592	2.59963	SAMD1	-1.02	LOC101928259	0.360131	FXR1	-0.251614	NXNL2	0.126231	SCIMP	-0.163243	WFDC10B	-0.523996	DPP3	-0.0991825	GABRG2	-0.153639	IFI35	-0.0265831	ALDOA	-0.644571	BC063011	0.57553	RPS10	-0.292
KRTAP4-11	0.126	S100A4	0.453	BCL11A	-0.535537	MIS18A	0.268882	FGFR1OP2	0.426943	PSMD1	-0.339354	CYTH4	0.482045	SLC25A32	-0.380961	PLEK2	0.10003	EIF4EBP2	0.374945	LOC102724689	-2.94211	TADA3	0.63	HNRNPA1	-0.66219	COQ4	-0.284224	HIST1H1D	0.170707	RTFDC1	-0.0673397	LTF	0.639554	MUS81	-0.0850054	NR1I3	-0.170315	KRTAP6-1	-0.0522525	RP11-326C3.7	1.06625	PHF13	0.253794	FOLR2	-0.372
ARSF	0.149	CDON	-0.169	TANGO2	0.276074	MIER2	0.257149	ZBTB7A	0.885386	OTUD7B	-0.556921	DEPDC1B	0.612187	TBC1D9	-0.382798	ERCC6L2	-0.105654	F12	-0.43381	MAGI1	-2.22192	CDKN3	1.31	ORC2	-0.439242	PRPF39	-0.382744	MRPL46	-0.120792	PSMC4	-0.0932859	APPBP2	1.02399	RNF19B	-0.121118	CDHR1	0.208224	LGTN	0.0359661	CERK	-0.498733	BC038516	0.253794	FOLR3	-0.372
TSPYL2	0.216	CHRAC1	0.275	LIAS	-0.216267	ALDH3A2	-0.224082	B3GALNT1	-1.25352	VAV2	0.409379	CNTN4	0.804697	DLD	-0.363933	APOL2	-0.240705	RPS15A	0.349127	LINC01304	-2.53607	AGXT2	0.584	DIS3L2	-0.614892	FOXP1	-0.261523	ZBTB34	0.0606964	GRN	-0.0876088	SNF8	0.696625	MCHR1	-0.126164	SEC14L1P1	-0.159549	SPP2	-0.0302027	LRRTM2	-0.438751	CHCHD4	0.283732	11q13	-0.372
SCARNA5	0.143	NXPE1	0.194	RUNDC3A	0.141645	VARS	0.304078	LOC399716	1.5322	VPS53	-0.359836	PSIP1	0.408468	TNS1	0.150406	MPPE1	-0.145973	DBF4	1.01633	PPP1R3F	-2.08344	CDKN2D	0.725	ABI2	-0.637512	C15orf40	-0.357823	TERT	0.123943	RAD23A	-0.0729321	SNORD94	0.782564	PIK3C2A	0.214244	ARHGEF9	0.140625	HBD	-0.0350786	RP11-542K23.9	-1.6961	BC033775	0.283732	U08471	-0.372
NUFIP2	-0.244	DCST1	0.179	PRDM16	0.14963	PURB	-0.254383	TLE1	-0.37263	TOX4	-0.450874	PRKD3	0.785239	MRPL33	-0.235272	VSNL1	-0.130481	FAM13C	-1.23472	LOC105373065	2.61902	ANKLE1	-0.465	MYO1G	-0.544502	KPNB1	0.264464	RER1	0.114254	NR4A3	-0.269155	ZNF460	0.645884	CLEC7A	-0.179763	LOC101927282	-0.152389	FAH	0.0581424	linc-TMEM132C-5	-0.546228	BC052580	0.260462	AK222539	-0.372
SNHG7	0.218	POP4	-0.226	ENPP1	-0.181214	SNAPC1	-0.19446	SNHG24	0.877894	VAV3	0.186004	LMAN1	1.18851	UBE2D2	-0.209885	C16orf62	-0.128509	UBE4B	0.320276	GLTPD2	-2.39451	DNASE1L1	0.545	GP1BA	-1.05133	WIPI2	-0.154859	SCAF11	0.108106	PSMB2	-0.0863004	SNORD53	0.513599	SAXO1	0.0940024	TBRG1	-0.16406	NDP	0.0443459	RP11-265N6.2	0.9581	CYP2R1	0.260462	ATP5H	-0.267
FDFT1	-0.255	DNAJC25-GNG10	0.209	SERPINA13P	0.560738	HINFP	-0.180085	ZNF790-AS1	-0.676955	SERINC3	-0.524172	FXYD3	0.604046	ZFP64	-0.1969	SMIM7	-0.130927	YIPF4	1.04898	GATA4	-2.51957	B4GALT4	-0.876	HFE	0.332045	GOLPH3L	-0.266637	NFYA	0.0628266	AKR1A1	-0.107183	HLA-DMB	-1.40616	IQGAP2	-0.140772	ISL1	0.143374	MRPL22	0.0388585	SYT4	-1.21464	PSG6	-0.522806	17q25	-0.267
DCST1	0.145	FAM150B	-0.178	ENO3	0.16967	CDRT1	0.224421	SYNE1	0.979162	SIAH1	0.25731	CCNG2	-0.760032	DDX1	-0.261946	TRAF6	0.114962	MUSK	-0.867513	FXYD4	-1.68515	P4HA2	0.656	WSB1	-1.00254	WIPF3	0.15819	CNOT2	0.0554901	ACBD7	0.240635	PRELID2	-0.636705	RCSD1	-0.106479	SLC2A13	-0.130262	C20orf38	0.0642751	GDA	-1.00756	BC020652	-0.522806	AF087135	-0.267
FAM58A	0.189	FAM47C	-0.137	KCNK1	0.156748	SLC6A1	-0.192321	CNNM2	0.384731	FBP2	0.109979	RNF17	0.388453	COPS5	-0.291069	MRAP2	-0.358345	CAD	-0.282155	KCTD16	1.52155	DNAH7	0.839	ATOH1	0.403816	CYP1B1-AS1	0.211073	MTCP1	0.142577	ERGIC3	-0.131734	ZDHHC19	-0.601668	MRPL3	-0.16131	PCDHA5	0.119596	HTR7	0.02972	RP11-398E10.1	-1.51028	M94890	-0.522806	RPL17	-0.304
LOC100129550	-0.245	VARS	0.425	GOLGA6L22	-0.197472	DAPK3	0.178167	ZDHHC9	0.343896	NCRNA00201	0.500734	C20orf24	0.916087	HYAL2	0.237357	GMEB1	-0.167554	ITGBL1	0.592302	RND1	2.5305	SLFN12	-1.2	PRM1	0.377569	PCM1	-0.148077	CHM	0.131569	NARS	-0.105237	COBL	-0.715516	PCDHA5	-0.125931	DNAH1	-0.173768	PPME1	0.0502017	KLHL1	-0.767956	PSG9	-0.522806	18q21	-0.304
DNAJB2	0.238	FAM92A1P2	0.149	ZNF281	-0.314169	IRF8	0.437984	TYW3	1.13809	CCDC115	-0.511861	LOC100128108	0.35164	ATP6AP2	-0.274182	GABRA1	-0.187197	DGKG	0.844843	DIRAS1	1.51805	PLP2	0.946	ASXL2	-1.06173	AFG3L2	-0.170888	AHCTF1	0.0814702	ALG14	-0.116529	MATN4	0.636662	GPX1	-0.117482	LOC728613	-0.230888	PARK7	0.0428684	NAP1L3	-0.636225	OR56A3	-0.879489	BC017831	-0.304
SLC30A5	-0.213	FLAD1	0.313	SNORD123	0.133455	AP2S1	0.251415	CTHRC1	-1.69165	CYP2F1	0.16232	DOCK4	1.42538	ALDH1L1	0.378878	SLC26A10	-0.155855	FOXG1	-0.58922	ACSL6	-1.66348	C15orf28	-1.32	RYBP	-0.764866	CD1C	-0.33055	NR3C1	-0.0956343	RPL39L	0.114281	MARK1	-0.637312	JMY	0.109364	GFRA2	0.123118	NFKB2	0.0450563	RP11-63E16.1	1.37816	ADAM21	-0.352544	OLR1	-0.397
RPUSD1	0.27	SYNJ2	-0.199	ICE1	0.150375	MKRN3	-0.274753	WNT4	1.05853	HSP90AB1	-0.121356	LMOD3	0.205832	FAM3C	-0.455173	AARS	-0.139646	PPP1R12B	0.551014	C7orf34	-2.57516	N4BP2L2	-0.924	SOS1-IT1	-0.919912	LINC00938	-0.324118	TYROBP	-0.210988	B4GALNT3	0.086224	IL36RN	-0.697886	CRH	-0.21737	HECTD2	-0.16774	IFNK	-0.033657	NRG1-IT1	-0.783241	ADAM21P1	-0.352544	AB010710	-0.397
FAM198B	0.1	GJB1	0.15	CD320	0.321205	ZNF253	-0.231267	PRICKLE1	-0.775002	PPP3R2	0.0839368	GPR27	0.383288	SERINC1	-0.286521	FLJ46365	0.126434	HSP90AB1	0.78533	TAF6L	1.30106	FANK1	0.84	GART	-1.07678	YRDC	-0.201404	LOC100129397	0.160277	FADS3	0.0801094	PRDM15	-0.607671	CMTM7	-0.145837	FAM124A	-0.126478	C9orf24	-0.0455116	7SK	1.91711	SAP25	-0.352544	AF529371	-0.305
ABHD14A	0.234	PSAT1	0.238	TSFM	0.200902	DOCK10	-0.236732	SFMBT2	-0.876914	TUBB6	0.142834	TPD52L2	-1.24507	TMX4	-0.36572	PDE7A	-0.121478	CYP1B1	-0.434533	COL18A1	2.51658	PSPC1	-0.928	TAS2R14	-0.708216	BAZ1B	-0.271893	SPAG9	0.115094	PIGX	-0.130386	SELT	-0.627163	CTSS	-0.23692	RBP1	0.238131	COG8	-0.042641	CIDEA	-0.903042	BC109024	-0.352544	HBCBP	-0.305
MSANTD2	-0.172	ILDR2	0.168	FAM13A	0.138769	MYH8	-0.178419	SREK1IP1	-0.402187	MBD3	0.370492	C22orf9	0.961774	SKAP2	-0.38495	PRNP	-0.120635	FAM189B	-0.330242	LINC00307	-3.26019	LEPR	1.75	DNAJC16	-0.54273	ZNF805	-0.279971	NMNAT3	0.069911	JOSD1	-0.134635	PRDM12	-0.486685	ARPC1B	-0.117622	ENDOV	-0.133552	FBXO30	0.0325581	LYRM9	-0.554272	DQ202398	-0.352544	CX3CR1	-0.36
HOTAIR	0.121	NDUFB5	0.219	HBQ1	0.811944	NDUFB4	0.233081	TSEN15	-0.322272	MAPKAP1	-0.264338	TTC37	1.20118	TNFRSF12A	0.242988	NAP1L2	-0.155437	WSB1	1.12147	GYPB	-2.40833	SCAMP5	1.09	ITGB3	-1.75973	DENND6A	-0.255731	CLEC16A	0.081844	EDN1	0.223074	SYNGAP1	-0.660507	MARK4	0.120644	CECR2	0.156511	C22orf19	0.0343348	RP11-586K2.1	-0.83488	AK074175	-0.352544	AK225764	-0.36
CHMP4B	0.22	SEPN1	0.253	CEP85L	-0.338964	SLC2A1	-0.339043	TUBGCP2	-0.853444	GPER	0.135733	KITLG	0.629974	RBM8A	-0.270034	C14orf132	-0.14405	BST1	0.940588	LINC01569	2.26806	MED24	0.42	FARSB	-0.826258	DNMT3A	-0.240427	TXNL4B	0.105863	TCF7L2	0.145867	HYAL1	-2.39317	BIN2	-0.201098	TAAR1	-0.174677	LMAN2L	0.0397231	MSC	-0.899435	LRCH4	-0.352544	AK023948	-0.299
ERAL1	0.255	MPDU1	0.219	MYL6	0.244945	BRD4	0.228802	MGP	-3.46545	NARFL	0.194059	HINT1	0.274666	VBP1	-0.243778	SLC6A5	-0.231643	PCDH9	0.522935	CALD1	2.1461	TRO	0.632	MGLL	-1.21225	HIST1H2BJ	-0.450525	ZNF83	0.0664619	FCGBP	-0.103693	ANAPC2	-0.682399	MRPL46	-0.195069	NR5A2	-0.174124	PCMTD1	-0.0367785	MIR490	-1.03896	7q22	-0.352544	PTCSC	-0.299
GGA2	-0.334	DHRS11	0.189	SNORA16B	-0.121773	MSRB2	0.419645	CAT	-0.708703	MBD3L5	0.162502	MBNL1	0.585409	RGS4	-0.980374	DLGAP5	0.122059	MFSD7	0.868584	RGS12	1.16155	AP3D1	0.546	PPP2R5C	-0.794144	ZNF736	-0.35447	PLK3	-0.0947382	F13A1	-0.236334	CATSPERD	-0.57309	SCIMP	-0.228216	LINC00944	-0.184756	WNK1	0.0567291	U1	-0.593185	NCRNA00241	-0.398739	8q24	-0.299
SNORA57	0.281	RBM39	-0.418	FIS1	0.386456	RNLS	0.35192	CPED1	-2.03063	MICAL2	-0.58706	C21orf94	-0.202768	MEAF6	-0.291191	ATP6V1A	-0.127855	MINA	1.14284	LOC101927735	2.72298	BAG1	0.727	SNAI3-AS1	0.409534	CHRAC1	-0.225826	BAX	-0.106228	MINOS1	-0.0835507	WASH3P	-0.614232	CHST1	0.170462	HBZ	-0.161308	BCL7A	0.0488876	VWC2L-IT1	-1.07157	6q26	-0.398739	LOC100124692	-0.293
ICE1	0.114	PARP8	0.238	MRPL49	0.241866	SNORA16B	0.262305	UHMK1	0.40816	COL11A1	0.346947	WDR73	0.528388	MYO7B	0.166946	TUBA4A	-0.149281	HAS1	-0.662736	MAGEB4	3.14485	COASY	-1.44	PDS5B	-0.806558	STT3A	-0.289188	FKTN	0.110864	PRDM16	0.110254	KLRC1	0.570576	ZNF687	0.103018	FRG1JP	-0.206894	THOP1	0.0752317	ATG16L1	-0.284173	AK026765	-0.398739	7q34	-0.293
FAM86B3P	0.124	AVL9	0.165	PASK	0.402393	OPTN	-0.438957	CRYZ	1.33726	PLP1	-0.568284	TRAF5	-1.44324	MRPL46	-0.245879	GABRA6	-0.276187	TM7SF2	-0.324956	TAF1	1.66887	SMARCD3	0.815	TBC1D2B	-0.529528	SRRM1	-0.225355	DDRGK1	-0.0654508	C1QBP	-0.104724	SNORA2B	-0.677674	LILRB1	-0.126477	PAX8	0.145585	LPPR4	0.0468502	CNRIP1	-0.514585	RNF182	0.776055	AB067511	-0.324
FOXP2	-0.136	RPS6KA3	-0.321	NARF	-0.238568	ADHFE1	-0.357936	HELZ2	0.809435	CD1A	0.153845	FGF14	-0.724336	CYCS	-0.242173	KIAA0430	-0.109575	PDE10A	0.834456	CDC20B	-2.40133	GABARAP	0.486	ZMAT3	-0.927069	FLJ37453	-0.180262	DIEXF	0.0976545	CD68	-0.165145	NRXN1	-0.700316	RCOR1	0.103424	RPL38	0.268385	SLC16A4	0.026248	CORO2A	-0.711722	6p23	0.776055	WDR90	-0.324
SNRPD3	-0.176	SNORA16B	0.141	DCAF12	0.923582	MIR610	0.212087	COL14A1	-1.05847	ATPIF1	-0.187057	APOBEC3G	0.203315	FXYD1	0.397382	IFT22	-0.121174	CALCOCO1	-0.256269	LINC01128	-2.52506	RAPGEF1	-1.24	PAGR1	-0.655029	SMPD1	0.210628	MRPS15	-0.0692611	LHFPL1	0.145806	PCDHA1	0.847963	LDLRAD4	-0.115512	GADD45GIP1	-0.168387	CWF19L2	-0.0530708	RPLP2	0.761821	BC030666	0.776055	CD53	-0.323
PRKCB	0.202	SP4	-0.35	SNORA80A	0.25417	KIAA0196	0.211946	KLF3	0.437309	TBC1D5	0.379194	SHANK3	1.1244	GNB5	-0.540704	PRDX2	-0.094074	TNK2	-0.334745	TRIM10	-2.24464	ADAMTS17	-0.812	ACTR3	-0.448154	DSEL	-0.210822	MAGI3	0.115835	TLR1	-0.166126	IGFL1	-0.691953	PCDHA2	-0.0813875	TFF3	0.201572	ZDHHC3	-0.0379868	MIR5690	1.58191	PLB1	-0.574425	1p13	-0.323
CLTCL1	0.159	FSHR	-0.143	PITHD1	0.753927	SCGB3A1	-0.853484	MSH4	0.701241	LPAR1	-0.710563	NPSA	0.267973	PITPNA	-0.286394	CLTC	-0.0763989	YWHAE	-0.537391	RHOJ	2.21487	SF1	0.504	GDAP2	-0.776975	FAM124A	0.15416	STOX2	0.0744005	KIF1BP	-0.145021	ECHDC1	-0.82358	DAB2	-0.189436	NUDCD3	0.115792	CYP11B1	-0.0413026	IL1R1	0.807131	BC150633	-0.574425	BC040693	-0.323
ELK3	-0.138	VPS53	0.146	SPRY3	0.122787	TOMM40	0.339233	TCF4	-0.643506	C5orf40	-0.522685	ZBTB24	-1.12574	IL17RB	0.359478	AZIN2	-0.110273	DLGAP4	-0.429171	LOC105371307	-2.75113	CXCL5	1	KAZN	0.444495	PDIA4	-0.321288	SST	-0.244737	SLC2A6	-0.107613	IGF1	-1.12577	WASF3	0.120197	LINC01126	-0.169983	GLE1L	0.0308928	DUSP3	-0.582413	SLC37A3	0.41609	EGR3	-0.362
MSH4	-0.111	MUC21	-0.123	MYH4	0.16677	L1CAM	0.214588	ABCC12	0.85593	DNAJC10	0.362308	ORC2L	1.23774	SSBP1	-0.324033	MIR181A1	0.306385	BEAN1	-0.554589	REG1A	1.37221	MGC57346	-0.756	H2AFY	0.296142	TLR6	0.483147	NAAA	0.0798784	OAZ1	-0.139722	RAD52	0.749441	PLCB2	-0.16766	UROD	-0.161485	PTPRA	-0.0424319	AL590482.1	-1.25201	7q34	0.41609	8p23-p21	-0.362
TUBA1B	0.325	CHD8	-0.252	XK	0.425081	TAAR6	-0.229001	PPM1A	0.407967	XG	0.158191	NCRNA00157	-0.244641	NRN1	-0.337092	BEX5	-0.183213	NOS2	-0.376134	GLYAT	2.83121	TBC1D29	-1.02	HACD1	0.378322	RSPH3	-0.430155	FDPSP2	-0.124014	MRPL21	-0.167758	CCDC26	0.550818	PCDHA10	-0.12872	ADIG	0.163186	KLF10	0.0288546	MANEAL	-0.557808	BC028380	0.41609	AK292464	-0.362
TFDP2	0.21	H1F0	0.563	SNORD31	0.514568	TNNC2	0.35803	GALNT2	0.460422	DNAI1	0.146658	CACNA2D4	0.318972	ETV1	-0.342878	NF1	-0.117516	ATP9A	-0.343189	HIVEP3	-2.33627	AMPH	0.87	NUFIP2	-0.426921	PPHLN1	-0.259367	SMCHD1	0.182229	CCT7	-0.143595	FBXO16	-0.51673	PSMB6	-0.178117	SV2C	0.151313	MAP2K3	0.0460943	EFR3A	-0.533801	HES1	0.28879	LOC100510059	-0.301
SLC22A12	0.11	COPE	0.291	SCARNA5	0.179063	FABP5	0.346953	FKBP11	0.362524	SARS	-0.278718	SFRS3	0.484501	PPP2CA	-0.238359	HEY1	-0.118322	PRKACA	-0.863242	PSG4	-2.80595	SLC1A4	0.973	TAF15	-1.15502	MRPL21	-0.211338	DYNC1LI2	0.0920635	EGFR	0.161198	MGC72080	0.793372	MT1P3	0.210825	EIF3H	0.309205	TXNRD1	0.0704748	LGI2	-0.609396	BC039152	0.28879	GPX1	-0.319
KCNJ12	0.127	RALGPS1	-0.198	LOC401554	-0.200999	EPB41L3	0.502365	COL6A6	-1.33501	NBR1	-0.743019	RAD23A	-0.732102	SUMO1	-0.380273	KLC2	-0.116835	CDT1	-0.755923	LINC00309	-2.88186	AGAP2	0.648	FCF1	-0.813275	TPP2	-0.301793	RIBC2	0.174805	SLC2A3	-0.152209	CABYR	-0.605012	ZNF502	0.139708	TRY2P	0.137289	C9orf116	-0.0347515	LIMS2	0.557652	NSMCE1	0.253966	Y00433	-0.319
FAM206A	0.208	NEXN	0.342	IQSEC3	-0.150252	KSR1	-0.187235	ITGA2B	-0.904317	HS6ST1	-0.367896	SAMD3	0.376721	UBE2B	-0.38236	VWA8	-0.100795	WNT7A	0.614165	MS4A3	2.75	ASAP1	0.717	SRSF7	-0.79413	EID2B	-0.342814	MEGF11	0.119798	KCNN3	0.171807	RNF14	-0.899999	SLC25A18	0.34408	UVSSA	-0.0958229	CECR5	-0.0628321	ST6GAL2-IT1	-0.708757	AK056795	0.253966	AK093488	-0.308
FAM83A-AS1	0.191	FKBP1A	0.315	PIP4K2B	-0.176001	FRMD4B	0.219076	LOC105375172	0.44845	KPNB1	0.271514	AIMP1	1.42183	EIF4E	-0.43161	SLC12A5	-0.126628	ZNF253	0.480139	DTX1	2.13617	CNOT6L	-1.64	ERN1	0.526445	PSAT1	-0.444671	ERP44	-0.0667271	ADSS	-0.116211	SYCE2	0.720843	ZNF740	-0.0927506	DOPEY1	0.187506	CLEC2D	-0.031078	FOXP2	-0.610451	SSX7	0.566675	HSPB9	-0.308
MIR1178	0.119	FLT4	0.154	KCNIP1	-0.181155	C1orf210	0.280574	RAP1A	0.690766	LRRFIP2	-0.778756	ATP5D	0.400293	OPTN	-0.332009	PSMB2	-0.0943387	PTGER3	0.676651	NEO1	2.53368	C9orf150	0.775	SRGAP2	-0.984182	ANKRD46	-0.296561	ZSCAN30	0.0977229	CD84	-0.127892	TP63	-0.708826	PRKAB2	0.151222	PKLR	-0.157742	RFX5	0.0266526	HIST1H1D	0.738467	SSX6	0.566675	AK292642	-0.393
FAM3A	0.287	FCF1	-0.2	TIMM23	0.276872	PTH1R	-0.187844	SLC14A1	1.14508	RNASEK	-0.266548	POM121L8P	0.456555	CASP4	0.160178	USP27X	-0.159507	MPP6	0.928392	PTPN1	-2.1796	FCN2	0.654	GOSR2	-0.49474	TMEM57	-0.363461	JAK2	0.051861	BIN2	-0.15121	SH2D4B	0.594566	TREM2	-0.119526	HSP90AA1	0.115944	C2orf21	0.0245872	linc-CDC16-5	-0.743715	TOMM22	0.31308	LOC554249	-0.393
GVINP1	-0.344	GBP5	0.558	HDGFL1	-0.142306	NR2F2	-0.218944	SLC46A2	1.13173	CAMK2B	-0.30793	SAT1	1.66163	RANBP6	-0.311478	ERGIC3	-0.134208	TAOK3	-0.337461	CLEC7A	2.07942	POTEE	1.58	PTGS1	-1.02437	RAB30	-0.436467	ABL2	0.0598453	NSUN3	-0.130918	SNX29	0.648962	HMBS	-0.0844707	CHRNB4	0.193897	PTPRD	-0.0462202	MYEOV2	0.638652	BC009363	0.31308	9q12	-0.393
DHX33	-0.154	PFKL	0.337	CYB561D1	0.247314	SPAG9	0.236882	EDN3	-0.945256	TCEAL3	-0.258972	SLC7A10	0.491169	SCMH1	0.171644	IMPDH2	-0.135522	GLI2	-0.552974	GLS	2.05671	MXI1	1.19	DDX52	-0.670622	ZC3HAV1L	-0.519015	IL3RA	-0.156689	CPED1	-0.142917	RAB20	-0.854474	BIN3-IT1	0.174389	LINC01122	-0.158859	DDC	-0.0722795	FKBP5	0.953187	MS4A14	-0.654312	AK092305	-0.393
TFE3	0.155	AGPAT2	0.348	PDHA1	-0.243881	SNAR-A1	-0.213937	IFT122	0.938662	LOXL2	0.0989497	ATP9A	-0.382015	RUFY3	-0.265205	WDR13	-0.105926	MN1	-0.905369	LPP	-2.06889	C8orf38	-0.868	NAPEPLD	-0.63954	WDR43	-0.346518	TREM2	-0.284686	MRPL45	-0.150249	DMRT2	0.609018	PHKA1	0.236362	KLK3	-0.140104	MRPS33	0.0267963	DRD1	-0.884083	MS4A7	-0.654312	MGC21881	-0.393
OS9	0.261	KRTAP10-9	-0.135	CEACAM6	-0.174061	TOP3A	-0.174737	SLC22A6	0.50977	FAM155B	0.317163	C1QTNF3	0.685864	NREP	-0.337063	PRKAR2B	-0.131217	VARS	-0.289596	MAF	-2.54707	EHMT1	-0.945	LOC105374587	0.320656	PEX13	-0.367227	SHMT1	0.102137	MFSD6	-0.0985628	RELN	-0.483943	THBS4	0.117733	LOC101928666	0.151473	SFRS2	0.0404884	GOLGA6A	0.852987	11q12	-0.654312	AK093722	-0.393
AKAIN1	0.149	SLX4IP	-0.218	UNCX	-0.159431	OR2B6	0.195652	IFI44	-0.849765	C7orf63	0.511878	FAM110A	0.597424	CLCN7	0.270359	SLC9B2	-0.13935	ARHGEF2	-0.358113	EXOSC10	1.76589	RGL1	0.762	KLF7	0.532485	PFAS	-0.309537	EPB41L5	0.0848827	PRKACB	-0.139932	C1orf226	0.782822	LY96	-0.114658	EFCAB1	-0.127149	IPO4	0.0318139	CALN1	-0.866165	AF309653	-0.654312	LOC728903	-0.393
SLC39A1	0.236	ALOX5AP	-0.217	DIO2	0.180907	RPS21	0.253088	COL12A1	-2.423	SEZ6L2	-0.475786	ARMCX1	0.619908	MMADHC	-0.328697	UFC1	-0.19022	DRD3	-0.972288	ITSN1	2.18563	GDF15	0.881	FTX	-0.902834	TIMM9	-0.216301	KIDINS220	0.0594053	SVOP	-0.237066	OGFOD3	0.928238	C14orf119	-0.154405	DDX17	-0.161957	PLEKHA4	-0.0321341	RP11-694D5.1	-0.865554	AK057418	-0.654312	NEUROD1	-0.31
BIRC3	-0.322	KYNU	0.385	MRM1	0.161451	LOC100128288	-0.574782	TSEN54	-0.417868	GGCT	-0.255611	COX6A1	0.280561	UBE2V2	-0.37693	UTS2	0.119527	SNAP23	0.536534	SCML4	-2.2193	RASGRP1	-1.41	ALS2CR12	0.359966	ZNF682	-0.285144	JTB	-0.0812236	GNRHR2	-0.104968	SPRR2B	0.468519	HLA-DMB	-0.214918	HM13	-0.162996	DPCR1	-0.0459374	PCSK1	-1.29093	C6orf48	0.333207	2q32	-0.31
RBBP4	-0.174	ENTPD1	0.27	AGER	0.148856	CLEC6A	0.200087	KCTD15	-0.500301	NEDD8	-0.244976	WDR8	0.615278	NEFL	-0.650155	MRPL40	-0.118953	ING3	0.355086	SCGB1A1	-3.36002	GYPA	1.88	LOC388882	0.331225	CYB5D1	-0.269076	ZNF317	0.0519635	BTG3	0.165241	PRKDC	-0.94053	UBE2Q2P1	0.111621	LOC101929497	0.164885	VPS41	0.03526	DACH1	-0.628458	SNORD52	0.333207	MIR27A	-0.302
TCF20	-0.255	CCDC175	0.148	SYNJ2	-0.211334	TROVE2	-0.287415	UBAP1L	0.967254	YDJC	0.406948	LANCL1	0.803038	PSMD14	-0.20634	MED24	-0.0972857	TRADD	0.935748	SBK1	2.47215	MORC3	1.12	CTDSPL	-1.31107	DNAJC17	-0.34718	LOC105370792	0.178746	PTPRC	-0.204314	ASCL2	0.889655	LHFPL1	0.204084	KRT222	-0.181016	GNAS	0.0387332	SEMA3A	-0.508957	BC000706	0.333207	AF480561	-0.302
KANSL1	-0.344	GNG10	0.39	OR2A42	-0.177233	DPH7	0.217655	HBP1	0.788584	SLC17A9	0.112324	ZNF708	1.05894	ZC3H7B	0.173413	DBN1	0.0897203	SMG5	-0.31294	TKTL2	-3.24875	BDP1	-1.9	CLDN11	0.370732	HIGD1A	-0.332225	GATC	0.101096	TMEM156	-0.156035	UBXN7	-0.534112	CNTFR	0.20142	LINC00907	-0.118111	C10orf95	0.037803	SYP	-0.999527	BC017660	0.333207	NCRNA00107	-0.308
NUCKS1	-0.551	SERF2	0.545	OR9I1	0.17948	PKD1L2	-0.204475	NCOR2	0.843588	ALG6	0.19001	ZNF836	-1.59073	DMXL2	-0.401233	RAB39A	0.153393	YME1L1	0.867136	ASB13	-2.43704	TMEM189	0.728	CBR4	-0.877282	AKAP12	-0.530142	NDFIP1	-0.0954835	GFRA1	0.127966	MMP21	-0.698799	GRWD1	-0.072638	HOXC4	-0.194287	KCTD1	-0.0526456	MIR4318	-1.1667	BT007334	0.333207	SRGN	-0.571
PTPN11	-0.188	MTO1	-0.166	YPEL4	0.137677	SPI1	0.445067	VIL1	0.38749	CNN2	0.122058	SEZ6	0.463604	COPS2	-0.321554	PSMC4	-0.0959209	PCBP4	0.985681	FOXL1	2.60246	B4GALT3	0.679	KRR1	-0.652795	CBY1	-0.163371	NKTR	0.103328	DBN1	0.100039	NACA2	0.655744	NR1H2	-0.0954875	TCP11L1	0.205091	GALM	0.0856656	SNORD115-48	-0.907948	X96651	0.333207	serglycin	-0.571
GUK1	0.5	IL25	-0.163	IFIT1B	1.16013	SNX18	0.190054	BDP1	0.721287	USP28	-0.448647	SLC25A44	0.75337	CNTD2	0.182138	C1QBP	-0.0988494	PLXND1	-0.288186	LOC284014	1.24313	ANKH	0.779	GUCY1A3	-1.16101	HUS1	-0.219508	B3GNT9	0.0984866	TBL1XR1	-0.177853	CSAG3	-0.504917	MERTK	0.319523	MIR4290HG	0.154057	IL4R	0.0596348	AC013283.1	-0.715691	ZKSCAN3	0.34908	BC015516	-0.571
NT5C2	-0.182	GLUD1	0.178	WRNIP1	-0.38039	STYK1	0.187028	PAPD4	0.88036	CAPN10	0.139291	DEFB132	-0.207472	OPA1	-0.269566	PANX1	-0.225459	C4BPB	1.15978	NEFL	3.18977	FUBP3	-0.72	ZNF302	-0.809347	C11orf71	-0.259553	KIAA1143	0.146603	ARPC1B	-0.0958973	FAM47B	-0.535272	MT2A	0.343576	NYAP2	-0.184092	PLD3	-0.0512752	UHMK1	-0.554324	ZKSCAN4	0.34908	LOC100293539	-0.387
ARMC6	0.155	ABHD14A	0.284	TRIM10	0.214879	HIST2H3D	0.200381	BVES-AS1	-0.990423	PDE12	0.563175	FKBP8	0.853104	MDH1	-0.370769	MYADM	-0.0974899	RAP1GAP2	-0.353282	TSPAN16	1.8239	RAD51L1	-1.11	QKI	-0.962562	ZNF33B	-0.264395	SLC25A38	0.0675712	MAK16	-0.154837	OSBPL3	1.15147	MTMR3	0.1123	FLT1	-0.192663	CRYGB	-0.0498731	AP001816.1	-0.544224	6p21	0.34908	UBC	-0.4
PLPPR3	-0.103	MIR1267	0.136	CAPN10	0.165271	PRKX	-0.339841	SLC5A3	0.496234	USP48	0.595223	ENKUR	0.563875	GNS	-0.306642	TPI1	-0.134079	SYT5	-0.430852	PYY2	1.63311	ZNF507	-1.29	MAN1C1	-0.470682	MRPS30	-0.275087	NIP7	-0.0784973	ITGAM	-0.154637	CTD-2297D10.2	-0.525833	F13A1	-0.251291	FOXG1	0.338599	APOH	-0.0448544	ENTPD4	-0.365878	BC014031	0.34908	AB009010	-0.4
CASC4	-0.186	ANKRD13A	0.317	MIR217	0.177195	PLLP	-0.20921	PPP4R2	0.407459	SIRPG	0.124432	KIFC3	-0.243842	WAS	0.188767	MIR30C2	0.220875	REPS2	-0.756715	RAET1E	1.84643	CAMK2D	-1.11	SET	-0.458238	RC3H2	-0.27187	ZNF502	0.0778312	ITIH2	-0.192717	NLRP3	-0.693633	ETNPPL	0.46622	SLC30A2	0.133431	PAPSS2	0.0194291	NKRF	-0.481676	AK091225	0.34908	BC041468	-0.283
APPBP2	-0.299	EFCAB13	0.149	UPF3A	-0.321769	CREB1	-0.542126	PHF7	0.364331	RPRD2	-0.650605	GPR180	1.19044	HPRT1	-0.455397	SLC9A1	-0.12753	CGRRF1	0.483525	EIF4E	1.2334	FAM134A	0.659	JAM3	-1.10776	TEX13A	0.205733	CMTM7	-0.146239	ETNPPL	0.391744	SPATA9	-0.648411	APBB1IP	-0.302643	NSAP11	0.11874	SMNDC1	0.0341885	ATP9A	-0.453998	SLC46A2	-0.370095	LOC339988	-0.283
RNU1-1	0.564	BBS7	-0.234	SLC36A4	-0.379987	PLAGL1	0.292175	SV2B	1.12908	C8orf4	-0.850661	PSD	0.740756	SYNCRIP	-0.305783	ZCCHC9	-0.118413	PRRC2A	-0.404084	C9orf66	3.08933	NOXO1	0.896	NTN1	0.328614	SBNO1	-0.186123	SLC25A29	0.0834518	SEMA7A	-0.129531	VWA3A	0.839012	TMEM109	-0.0950755	LOC284661	-0.127327	EYA4	0.0462472	RGCC	0.805564	9q32	-0.370095	OCM2	-0.305
PQLC1	0.261	PYHIN1	-0.336	TMEM99	0.280962	ZRSR2	-0.205048	FETUB	-0.893401	ZNF148	0.194405	TAF3	1.49693	CDC42EP4	0.291435	STOML2	-0.125806	CEP170B	-0.738828	EXT1	3.29502	FKBP9	1	SGK494	-0.804664	SMC5-AS1	0.173893	FIGNL1	0.137553	ETNK2	0.117134	GGTA1P	0.580974	CYTH4	-0.157007	PPDPF	-0.17099	CX36	0.0440893	TRIM37	-0.554278	BC048285	-0.370095	OCM	-0.305
ARSB	0.154	TROVE2	-0.348	N6AMT1	-0.205613	TMEM98	0.227116	POM121L9P	0.782001	LIN7A	-0.419123	MED24	0.591415	ATP5C1	-0.193663	ANK2	-0.112493	RASA1	-0.319847	TPTE2P5	-1.83533	PRELID2	1.45	PSMD5-AS1	-1.67373	MIGA1	-0.348191	SORD	0.0994242	PIWIL1	0.0799439	NANOS1	-0.568897	TMEM19	-0.132813	DPYSL5	0.173075	RBBP4	-0.0598873	HRK	-0.743591	AK128080	-0.370095	oncomodulin	-0.305
MOB4	-0.173	BRD8	0.117	MPP1	0.710656	EML4	-0.286425	DLG1	0.497925	JAG1	0.119146	CUL3	0.629912	CREB1	-0.371165	NECAP1	-0.109975	PTPN3	-0.462703	LOC100506472	1.31924	WDR13	0.501	LOC100506790	0.389083	HIC2	-0.233564	NDUFA9	-0.060643	VASN	0.0808313	ZNF620	-0.429184	HIST1H1C	0.177491	ROPN1B	0.13758	RNASEH2A	-0.042489	PANX1	-0.576139	SNX30	-0.370095	BC113704	-0.305
MYL6	0.195	PDS5B	-0.24	BTG2	0.55113	GNS	0.38526	CYP7A1	1.33214	TRIM33	0.577155	ARHGEF6	-0.813425	DNM3	-0.250992	SCAMP5	-0.104179	PLXNA3	-0.422637	MAPK10	1.93485	ITPRIP	-1.17	CD163L1	0.371433	SMAD2	-0.173631	CORT	-0.114783	PTPA	-0.112011	MYT1L-AS1	0.547682	STAP1	-0.0868822	MIR4500HG	-0.213829	ZNF571	0.0269351	FABP3	-0.910987	C6orf105	0.292855	RPS8	-0.272
MPP1	0.534	CLN6	0.189	ADHFE1	0.344561	CPLX2	-0.195554	FAM43A	-0.542201	RIF1	0.246881	MAP1B	-0.214542	PPM1A	-0.211524	DIO1	0.138391	SYP	-0.564193	HOXD9	-1.74514	ZNF83	-0.715	C9orf40	0.56357	GRSF1	-0.370615	CHMP4B	-0.110658	GPR108	-0.0801693	LRP2	-0.692946	SDS	0.250782	TENM3	0.162471	LMX1B	0.0395537	AP001626.2	1.1423	BC007011	0.292855	AB062401	-0.272
ADK	-0.12	TPD52	-0.181	RHCE	0.224115	F8A3	0.245068	PRKD1	-0.529814	ZC3H4	0.157167	MAGEC3	0.199558	RAP1GDS1	-0.267815	TRMT1	-0.0961416	AQP4	0.593999	SYT7	-2.30728	COL4A6	-0.661	BCL11B	-0.702194	EIF3J-AS1	-0.192751	LOC105375800	0.116243	SULT1C4	0.167516	NPB	0.754564	INPP5D	-0.215441	LOC100126784	-0.140297	LMTK2	0.0453238	IGFBPL1	-0.762222	AJ420520	0.292855	SST	-0.43
RUFY1	0.368	PURA	-0.308	DACH1	-0.140716	RORA	-0.432587	MEG3	1.22149	DMBX1	0.106177	KCNJ11	-0.753233	DVL2	0.241139	CAMK2B	-0.118848	INPP5D	-0.341846	WDR49	1.71835	CHPT1	1.05	PAPD4	-1.41595	ADAT2	-0.283756	ABCG1	0.0672497	FRG1BP	-0.168091	PIGA	-0.723803	IGF1	-0.167251	MIR302B	0.241851	SLC1A3	0.0378416	SNORD113-1	-0.912284	AK300919	0.292855	somatostatin	-0.43
SNAP47	-0.24	LOC100130298	-0.196	NEUROG3	0.1368	PYHIN1	-0.367314	SFXN3	-1.46405	CUTA	-0.348965	CLCC1	-1.48584	EFEMP2	0.22547	EHMT2	-0.0857456	SKIL	1.21851	KIAA0509	-1.43235	SCAND2	-0.677	RCAN1	0.55135	SVIP	-0.245647	ZNF37BP	0.0766331	APOO	-0.143457	NPS	0.694046	GPC5	0.371834	PATZ1	-0.160353	CDH26	-0.0942161	HSDL1	-0.467663	AK123258	0.292855	3q28	-0.43
U2AF2	-0.182	ACADSB	0.198	ANKRD34A	0.164895	CACNA1E	0.178915	EGFLAM	-1.14716	CSTF3	-0.316517	EXD1	0.366855	COPS3	-0.271057	TAPBP	-0.130148	EMX2	1.06021	CNTROB	2.48316	FAM189B	0.521	SCG3	0.278122	LOC102606465	-0.368863	ZNF146	0.10975	NDUFS3	-0.0960974	FAM224A	0.445088	ASAP3	0.0963009	YARS	-0.133554	MUC3B	-0.0297243	ANXA6	-0.678198	AK310611	0.292855	BC032625	-0.43
ZNF222	0.141	GRAMD4	0.347	FRG2DP	0.135739	POTEF	-0.23073	MMGT1	0.367934	ITPR1	-0.360784	YTHDF3	0.473565	B4GALT6	-0.438325	FAM49B	-0.104196	SLC16A7	-0.611286	DDX11-AS1	-2.8976	SCNM1	0.606	SDCCAG3	-0.872209	ZNF766	-0.210284	DDX42	0.0618469	TLR7	-0.139498	TCP10	-0.685883	VWC2	-0.111502	SIRT5	-0.130463	FAM29A	0.0415524	PAX7	-1.17412	TAS2R3	-0.571407	GSC2	-0.308
GAPDH	0.382	PKD1L2	-0.135	SLC37A3	0.169322	FAM20B	-0.334866	DYNC1H1	0.494847	AICDA	0.116769	MOSPD2	1.01755	ACTR10	-0.293486	PBRM1	-0.114011	YY1	0.824713	TMEM178B	1.28426	RNF217	0.991	TBRG1	-0.563464	ZNF814	-0.376762	PHBP19	-0.0631145	IVD	-0.0956515	SLCO1A2	0.499694	EGFR	0.228115	LINC01138	-0.155626	WDR37	0.030831	NELL2	-0.928391	BC095523	-0.571407	AY358802	-0.319
MRPS6	-0.191	LPCAT3	0.324	CCDC96	0.150939	ZNF394	-0.623141	MYO9B	-0.406165	UACA	0.235959	DNASE1L2	0.260077	TRIP10	0.233256	NEBL	-0.112427	NR4A3	0.953829	RPS6KA2-AS1	-1.67701	HEXDC	0.636	PDK1	-1.25792	EXOSC2	-0.298586	USP22	-0.169873	INPP5D	-0.170229	LRPAP1	0.55806	FGL2	-0.349652	MUC7	-0.160302	C6orf79	0.0942967	TUBB2A	-1.0176	FLJ32063	0.366472	LOC646513	-0.319
NTM	-0.145	C6orf99	0.126	RTP1	0.164162	UNC5C	0.205488	FRMPD1	0.903692	KCNQ1OT1	0.279269	C16orf70	0.67052	TXNDC9	-0.346062	MEGF6	0.0916863	STIL	0.969703	CCDC158	-1.03105	FLNB	0.606	CTNNA3	0.384324	NUDT15	-0.246583	HLA-DMA	-0.147249	SLC25A23	0.109308	CACNG6	-0.541358	FUT10	0.200624	LOC101928284	-0.126887	CREBL1	0.0489479	CNIH3	-0.559124	SATB2	0.366472	VLGN1945	-0.319
TMEM140	0.351	ZBED1	0.233	FAM227B	0.186039	MYL6B	0.252443	SLC39A5	0.619257	GLS	0.469577	ROPN1L	0.806247	SFPQ	-0.270427	LRRIQ1	0.155929	SLC10A2	-0.949128	DEFB126	2.88553	C15orf26	1.49	LUC7L3	-0.420311	MZF1	-0.194337	KDELC1	0.0973101	DUSP4	-0.250618	SLC27A6	-0.440425	B3GNT5	-0.296468	RRAGC	0.149556	TPO	-0.0690908	CSRNP3	-0.762951	2q33	0.366472	LYVE1	-0.344
STYXL1	0.223	SSX4	-0.206	KCNJ12	0.162305	DUSP19	-0.594316	IL11	0.908603	ZNF708	0.559205	C2CD2L	-0.620149	RBCK1	0.207521	CAPZB	-0.101071	NGF	-0.723557	DDX10	-2.65352	DDX17	-0.449	SLC38A9	-0.665141	MTF1	0.242359	L3MBTL1	0.0858676	MYOF	-0.175685	KIAA0895L	0.566598	HCRTR2	-0.156365	NRP2	0.188627	SS18L2	0.0261476	DYNC1I1	-0.573377	AK056625	0.366472	11p15	-0.344
RHOG	0.421	OSTC	-0.312	B4GALT1	-0.339023	FYN	-0.224936	DOCK11	0.603118	CLINT1	0.488021	SMN1	0.648281	RHBDF1	0.155035	ZNF107	0.140179	TMEM251	-0.444938	MRS2	2.6334	LTC4S	1.53	RBM39	-0.954717	IL18BP	-0.334159	EPB41	0.148278	MRAP2	-0.21999	VCY	0.439304	CSF3R	-0.113399	XIAP	0.149361	CSN3	-0.0448253	PDK4	0.97085	CA8	-0.345567	AY358925	-0.344
MEOX1	0.107	APPBP2	-0.384	BCAS4	-0.190139	TTTY5	0.213422	HEPH	1.05331	SNX12	-0.26038	HDAC2	-0.497037	GLRB	-0.625937	ERICH3	-0.321914	NOVA1	-0.355798	MYO5A	-2.83368	JTB	0.401	RHOBTB3	-1.00993	C9orf16	-0.33683	RBM8A	-0.0541185	STAG3L4	-0.188003	TTC28-AS1	-0.528836	VGF	-0.149624	POLE4	-0.169391	OBFC1	0.040039	CTD-2258A20.5	0.845848	BC069794	-0.345567	SPN	-0.303
HLA-H	0.521	SORT1	0.294	NR4A2	0.910301	SSH2	0.298475	CRYM	-1.01019	ACAA1	0.18002	CNOT6L	1.32231	KRAS	-0.296058	ZNF740	-0.100186	PLS1	-0.512522	BIN3-IT1	-1.85214	XK	2.09	AURKC	0.389964	DDX28	-0.20048	PPP3R1	0.192487	LAMA4	-0.167397	ATP2B1	0.637426	MRPL58	-0.115814	PATJ	-0.149666	MPP2	0.0536565	LDHA	-0.596825	OR1L1	-0.340977	sialophorin	-0.303
C1orf162	0.274	MIR548H4	0.11	CRLF1	-0.151265	TSC22D1	0.445325	CNTN4	-1.05917	NCBP2	-0.471083	KIAA0649	-0.996979	DYNLT3	-0.274462	CHGB	-0.154246	NFIC	-0.282078	IL1RL1	2.03707	NEIL3	1.61	RAB27B	-1.14495	RBMS1	0.181766	ATF6	0.100759	PLEKHB2	-0.150583	PTMA	-0.683828	ENHO	0.166946	ANKS1B	0.153715	ERBB2	0.0488509	DPY19L1	-0.466401	DDO	0.279863	AK126579	-0.292
ZAK	0.303	FBXO25	0.168	SNORA63	0.191081	SEPN1	0.287953	NBEAL1	-1.03682	PDCD10	-0.303653	TIMM17A	-0.679779	BCAS2	-0.274513	HIST1H2BF	0.294782	CA4	-0.352341	PTPN14	2.14651	LRRC37A3	-1.46	ATOH8	0.614449	MIS18A	-0.412157	PTGS1	-0.266778	HLA-DMB	-0.16099	ADGRG7	-2.434	NPTX2	-0.256145	UCKL1	-0.155592	SDHA	-0.042131	CAMK2D	-0.531369	6q21	0.279863	LOC100130930	-0.292
NRXN1	-0.111	HIST1H2BD	0.44	ABCC4	0.420585	ELL	0.225853	ASPN	-2.6745	SYNJ1	-0.384313	SEMA5A	1.16344	XKR8	0.125505	SUN3	0.103568	PIK3C2G	-1.02442	STXBP2	-2.25772	MBNL3	1.38	PRDM15	0.377666	EXT1	0.279002	TUFT1	0.0888263	DKK1	-0.102694	ADRA1A	0.73411	PCDHA7	-0.120156	SMARCA2	0.221941	GNB2L1	0.0256113	RBPMS	0.67133	BC032786	0.279863	AK298731	-0.281
STK26	-0.262	DSC3	0.182	TIMP4	0.150343	SPDYE2B	0.325587	COL5A2	-1.14189	NDUFV1	-0.314263	VANGL1	0.793193	ATP5G3	-0.342591	ATP6V1B2	-0.117563	MUC1	0.940562	TMEM136	-1.75575	CLEC4C	0.675	XPO7	-1.04287	SUB1	-0.302611	DIS3	0.0552561	HCLS1	-0.144718	TRIM60	0.676094	RHOBTB3	0.281687	MARVELD2	-0.188098	PSMC2	0.0329182	SEZ6L2	-0.798655	C6orf186	0.279863	PILRA	-0.281
SMARCE1	-0.255	STK26	-0.336	RGS1	1.06366	CENPE	0.169177	SLC25A30	-0.659706	MESDC1	0.153307	MRPL3	0.689186	NDFIP1	-0.327997	PTS	-0.141845	RSU1	0.376598	CATSPERG	-1.44849	ST7	0.821	SLC25A16	-0.617293	ATF7IP2	-0.348219	CHD9	0.0591533	COPA	-0.0943096	BNC1	1.14468	ANKRD62	0.153607	LINC00460	0.137317	TMCO3	0.056506	SULT4A1	-1.11694	C22orf34	-0.428569	LOC100508507	-0.261
CUL1	0.224	SLC36A4	-0.127	MIR1178	0.153981	PRMT2	-0.315775	S100A13	0.379793	CTSA	-0.423322	LMF2	0.967239	SLC22A14	0.19983	PDCL3	-0.175885	CA12	0.315074	CA12	-2.44428	PCDHGC5	0.647	LOC101927516	0.381889	TMEM158	-0.769173	P2RY8	0.131322	MRPL9	-0.139295	HMGB1	-0.523553	LAMB3	-0.097715	KDM1B	-0.142131	DSCR10	-0.0328348	BABAM1	-0.440253	AK126430	-0.428569	LOC100287558	-0.28
LRP10	0.349	CTSL	0.605	ANXA10	0.157352	HIST1H3H	0.675056	GK	-0.713834	IRF9	0.171173	SFRS18	0.811164	STMN1	-0.25383	TRIB2	-0.23428	ADRB3	0.813367	LTBP2	-2.89477	MIOS	-1.36	ZNF271P	-0.644597	TSPAN13	-0.409792	TNFAIP8L2	-0.193614	NDNF	-0.128113	TMEM220	-0.59137	NCKAP1L	-0.256525	METTL9	0.261176	CLN8	0.0646767	SCN2B	-0.780756	AK124962	-0.428569	TTTY19	-0.258
BIRC2	-0.242	CCT6B	0.195	SLC4A1	0.896571	KLF3	0.3639	LOC101927131	-0.8051	EIF2AK1	-0.428297	NBEAL1	0.416162	STAT1	-0.293699	SLC35A4	-0.107588	DCTN5	0.566715	GUCY1B2	-2.10724	DMKN	-0.459	ZNF791	-0.496213	RBM25	-0.237803	ATG3	0.127498	FDPS	-0.103437	KCNH8	0.693079	HERPUD1	-0.145636	NCAM1	0.120014	ATP5H	0.0598527	XKR4	-0.615098	BC118575	-0.428569	TTTY16	-0.254
LAMP2	0.2	MIR638	0.203	TMPO	-0.256942	DIP2A	-0.276043	HELB	0.620944	ARL15	0.232984	ZNF585A	-1.52148	EML3	0.208376	PGK1	-0.108865	COMP	0.845054	KRTAP1-3	-3.03983	CYB5R3	0.536	BFAR	-0.333277	PHYH	-0.317588	TCF20	0.0607289	FOLR2	-0.0842808	NCKIPSD	-0.761704	DCPS	-0.0866216	CAPS	-0.138962	TBPL1	0.0522073	MCAT	-0.599927	ANKRD45	0.330311
TMPO	-0.208	MAS1	0.153	MUC15	-0.172305	TICAM1	0.28702	ZBBX	0.694737	CHADL	-0.805675	C21orf67	0.412408	SACS	-0.35022	FGF12	-0.121394	SH2B2	0.38282	MEGF10	-1.48005	UBE2Q1	0.575	CTTN	-1.36503	NSDHL	-0.210548	SMC6	0.0798092	RABGGTA	-0.0956767	RHOBTB3	-1.00182	TMEM100	0.159442	SERPINB11	-0.103484	C1orf107	0.0995585	KBTBD6	-0.364378	BC126353	0.330311
TMEM72	-0.147	STAT1	0.711	WNT10A	0.153263	ZCCHC11	-0.211621	DNAH17	0.926014	APOBEC3G	0.112759	RAPGEF6	0.849054	RARS	-0.259839	PPT1	-0.155726	CLDN9	0.698664	TARBP2	-1.53693	TMEM68	-1.02	ACE	0.341466	USP37	-0.328415	WDR20	0.0692045	FNDC9	-0.173651	PPP5C	-0.84062	KREMEN1	0.116681	RNF43	0.250846	VEGF	0.0619674	B3GNT1	-0.720543	CPO	0.262864
SNORD22	0.145	WDR60	-0.208	POTEF	0.184524	FBXO17	0.195458	SLC28A2	0.725142	SLC2A11	0.29894	LCOR	0.992184	TUBB2A	-0.243788	ELAVL2	-0.294689	SPN	-0.695526	MCMDC2	-2.36452	PKD1	0.632	CSNK1A1P1	0.27546	VPS36	-0.204285	PSMA6	-0.0592923	C1QC	-0.166688	ZNF641	-0.877686	GCDH	0.116505	HYI-AS1	-0.113087	HCFC2	0.0287	IRAK3	0.752205	BC112076	0.262864
RNF123	0.203	UOX	-0.161	SNRNP27	-0.24169	SERAC1	-0.167461	FBXW8	-0.676076	POMP	-0.239559	ZNF662	0.767954	RHEB	-0.259551	MRPS7	-0.0974765	RHO	0.535374	CHD2	2.89399	MELK	1.14	GPATCH2L	-0.972063	STON2	-0.582408	GIMAP1	-0.100071	PROM1	-0.14469	A1BG	-0.617043	KRBA2	-0.141266	FAIM2	-0.131621	PPIE	0.0472116	ZYG11B	-0.529396	HIST1H1A	0.293205
SPECC1L	-0.306	ME3	-0.124	GUSB	0.232304	RAB32	0.274673	ATP13A5	1.19835	NARS	-0.215127	LRRC8D	1.0096	AKAP9	-0.258054	ZNF451	0.117001	CYTIP	0.986793	SGIP1	1.91868	KLC1	-0.831	PLCB2	0.286116	TMEM256	-0.289769	PSPH	-0.131297	FOS	-0.406436	UTS2	-0.769897	DOCK11	-0.182999	RHO	0.193288	PPIL3	0.0376347	LPO	-0.736536	BC101593	0.293205
ISM1	0.16	RHBDD1	0.189	EMC3	0.333331	EID2B	-0.499765	CLCN5	0.358287	REEP5	-0.195724	ZNF623	-0.967075	NPY	-0.537911	GNB1	-0.0791159	SAP30	0.73564	TBC1D16	-2.70542	PPM1D	-1.22	TRAF3IP3	-1.01178	ZNF776	-0.261258	FAM35A	0.099959	GALC	-0.123204	SERPINA1	0.708813	RCL1	0.120719	ZNF562	0.137451	STAC2	0.0345139	TMEM169	-0.440233	ADM	0.517978
ROCK1	-0.299	MIR892B	0.181	ADK	-0.155649	TRAPPC2L	-0.275359	SAMMSON	1.34614	HARS2	-0.516793	HNRNPH3	0.535711	SERINC3	-0.284305	HIST1H2AC	0.217175	BRD8	-0.476496	LINGO2	-1.36465	GDI1	0.643	PPA2	-0.975759	ERLIN2	-0.317514	SOX11	0.102402	RNF19B	-0.175565	FGFBP1	-0.632079	C3AR1	-0.318549	SUZ12	-0.110819	ADRB2	0.047473	DNAJC5	-0.67678	adrenomedullin	0.517978
SPRED2	-0.102	HTATIP2	0.33	GOT1L1	0.178314	FAM110A	0.445923	RMST	1.25572	GLYAT	0.0753684	ABHD13	0.886041	PAK4	0.127967	ZNF219	-0.126852	INS	0.901512	LOC106146153	2.74286	CREG1	0.701	SBF2	0.651996	LBH	-0.402549	SPATA32	0.193273	COA3	-0.0953233	SPIN2A	-0.700759	DOCK2	-0.234485	TRHDE-AS1	-0.119776	ZNF212	0.0265861	UBE2QL1	-0.926736	BC015961	0.517978
WHAMM	-0.311	TPRXL	-0.0983	NUP62CL	0.137529	COX5B	0.35995	OLFML1	-1.16417	CELA3A	0.175596	GUF1	-1.44271	NAP1L2	-0.347739	CNTNAP1	-0.189284	SAR1A	0.590259	C9orf57	-2.76579	LRCH3	1.15	PRCP	0.394942	HSPA9	-0.324526	IGF1	-0.163318	PGK1	-0.136908	PCNX4	-0.711604	QRFPR	-0.138661	XIRP1	0.151957	SLC39A8	0.0331388	LRRN3	-0.588438	GLTSCR2	0.38062
VPS53	0.115	CCDC86	0.335	EIF1	0.521672	ABTB2	-0.226091	LOC100507507	0.981092	CHGB	-0.189576	TTC31	0.368641	IARS	-0.28067	PSMC3	-0.105375	YBX1	0.974642	ASCL1	-2.07378	CTDP1	-0.96	ACTN1	0.355511	INTS5	-0.248059	ITGA8	0.13677	LZTR1	-0.0910192	LOC440895	0.598982	ARHGEF26	0.289013	TAS2R7	0.096419	ASH2L	0.0252317	C12orf52	-0.599067	SNORD23	0.38062
MIR26A1	0.103	KCTD17	0.198	SELENBP1	0.876169	CHCHD7	-0.407273	CRYGC	0.880551	DAD1	-0.340016	BNIP1	0.626339	TUBGCP4	-0.355507	HNRNPCL1	0.140668	RPL22	0.347039	PRKAA2	2.29939	MAGEA8	0.839	ZNF160	-0.952004	ZNF606	-0.171511	RBMXL1	0.057942	CD14	-0.235442	CMA1	-0.731906	MRC1	-0.240418	LRRFIP1	-0.140545	LOC202459	-0.0354263	OSMR	0.707806	AL359335	0.38062
ALG5	-0.196	SIL1	0.256	ARL14EPL	0.17374	AMD1	0.380523	FCRL4	1.2944	PPP2R2C	-0.639749	EPS8L2	0.235299	PNP	0.280618	JOSD1	-0.127721	PRPF18	0.376743	ZBED3-AS1	2.89852	TMEM183A	0.55	GNRH1	-0.740428	ARVCF	0.22946	ZNF207	0.0436292	IDH3G	-0.144743	HAND1	-1.16066	HLA-DMA	-0.190792	CLASP2	-0.150415	SAPS2	0.0611498	ATP6V0E2	-0.502593	BC006311	0.38062
C11orf80	-0.401	MUC1	0.121	UACA	-0.12542	PTER	0.196031	GPATCH2	0.336905	CPLX4	0.111582	PGK1	-0.351216	PDHX	-0.268414	RUFY3	-0.088082	PTPRN	-0.297657	DCLK1	-2.12263	RASGEF1B	-1.13	FGFR3	0.289697	INTS6-AS1	-0.257394	TM2D2	-0.0740569	SLC35A4	-0.096852	STARD6	-0.539054	CXXC5	-0.0887377	SMAD1	-0.171455	C7orf9	-0.0460001	PRELID1	-0.441812	BC010095	0.38062
MRPL10	0.284	SORBS2	0.108	OR2M1P	-0.164436	H1FNT	-0.190085	VIP	1.18986	C6orf97	0.131718	DIAPH3	0.731197	GAD1	-0.432989	CDKL5	0.125029	KLK1	0.729594	SLC4A7	-1.90536	MESDC2	-0.923	LOC105376166	0.293684	CLSTN3	0.340468	ZNF195	0.0563811	DPAGT1	-0.100075	GAB4	0.608323	CHRDL1	0.265968	TCF3	0.177286	FAF1	0.0840962	SVOP	-1.06871	AF182076	0.38062
CCRL2	-0.14	SCARB2	0.338	TULP4	-0.28143	BOP1	0.244794	TGDS	0.453794	FRAT1	0.132396	NMD3	0.992014	ITFG1	-0.463035	ATP5SL	-0.124997	GALE	-0.706394	MAGI2-AS3	3.58184	COL22A1	0.518	ASXL1	-0.766113	CPLX2	0.190877	ZNF563	0.193761	TMEM17	-0.147787	PSG11	-1.66965	WDFY4	-0.0976674	LINC00612	-0.150825	WDR12	0.0409064	PEG3	-0.499433	AL359336	0.38062
RALB	0.27	ABHD13	-0.225	UBQLN1	0.243867	MATK	-0.2803	SIX2	-0.624089	ARMCX3	-0.467992	PPP2R5B	0.718644	ATP5F1	-0.204393	ADD2	-0.110893	CD226	-0.88412	LOC101928167	-2.28812	SLC9A3	0.67	ACER3	-0.631941	MAN2A1	-0.178109	TTC25	0.0904352	IDH3A	-0.140259	TPD52L3	-0.662498	ELMO1	-0.163899	NDUFV3	-0.124925	HNF4A	-0.0280421	ENO2	-0.681133	AY535000	0.38062
PPIG	-0.179	IGF2BP3	0.294	STS	0.126349	GGTLC1	0.219544	SPATA18	0.762496	PA2G4	-0.33417	RG9MTD2	0.924156	PAFAH1B1	-0.330322	MLLT11	-0.171345	CPNE6	-0.261772	ATRNL1	1.43035	CRLS1	1.41	U2SURP	-1.08258	ZNF597	-0.215763	CTNNA3	0.197218	CASP1	-0.15677	RFX4	0.801026	LGALS9	-0.165921	COG2	-0.107483	LOC284361	-0.0447587	CD99L2	-0.374097	AK297877	0.38062
NEDD4	-0.114	RIOK3	0.256	SULT6B1	0.137802	LST1	0.734148	NID1	-1.57269	PGAP2	0.150225	SCLT1	1.30473	RTCA	-0.372769	PIGX	-0.159577	SH3PXD2A	1.07882	ZNF205-AS1	1.9521	KCNQ5	-1.15	S1PR3	0.35983	LSM1	-0.132789	PAPOLA	-0.0681455	SLC16A7	-0.184383	MMP28	-0.538753	MT1M	0.36907	NABP2	-0.178289	TAS2R9	-0.0527252	RP11-388B24.1	-1.37425	AK303918	0.38062
PTPRC	-0.144	MIR1468	-0.146	LINC00689	-0.151717	ESRRG	0.173681	CSNK1A1	0.471879	NF1	0.394988	RBM25	-0.667649	C22orf46	0.16532	RPS18P9	0.109275	VWA5A	0.821589	CCR3	-2.48208	RGS6	0.775	RNF115	-0.385441	METTL13	-0.162414	RECQL5	0.128308	CHCHD4	-0.0860836	LRRC20	-0.453136	PRMT1	-0.0918418	SSR3	0.135335	GNLY	-0.0384946	TUBB	-0.571386	AK301117	0.38062
OPRL1	0.132	KIFAP3	-0.268	GYPC	0.806194	MUC15	0.213035	TBX5-AS1	0.699385	UFC1	-0.356716	FBXO44	0.642102	RNF11	-0.309669	DYRK2	0.0953428	LRP4	0.409989	KCNK1	0.917799	ZDHHC2	0.771	EPHB2	0.371499	HSF5	-0.332955	EP400	0.060954	APCDD1	0.145261	NXPH4	0.479034	DDAH1	0.153685	KCNJ13	-0.17349	CDC6	0.0221466	AC012506.3	-0.940828	AK024486	0.38062
RNA28S5	-0.527	KLC2	0.137	ARSF	0.172662	NUAK1	-0.285818	HOXB-AS3	-1.54448	ASB15	0.118143	SLC13A5	-0.215388	CRYZL1	-0.264481	FDX1L	-0.107902	SERPINB7	-0.807598	SPRR3	2.11428	GPT2	0.723	CCZ1B	-0.751522	CHCHD5	-0.335124	AKR1B1	-0.0595514	SLC38A2	-0.154717	ATP2B2	-0.613641	HTRA2	-0.0849997	WDR3	-0.0978812	GNPTAB	0.0234356	PPM1H	-0.351245	BC007248	0.38062
SMOX	0.385	CRCP	0.197	PLIN2	0.307459	PRKCQ-AS1	-0.392099	SGCD	-1.59449	LGMN	-0.502391	C13orf33	-0.248087	HEY1	-0.210387	SPRED1	-0.235355	KCNG1	-0.304962	ACTG1P17	1.78176	ASXL1	0.537	ITGA2B	-1.54168	CNOT2	-0.131184	KLHL12	0.0590488	SPRY4	-0.173716	AKR1C2	-0.5518	P2RY12	-0.493588	GYPE	0.212744	EYA2	0.0638582	WNT16	-1.07641	AK225915	0.38062
XK	0.313	CHMP3	0.395	GIT2	-0.171918	HIST2H3C	0.277176	SEMA5A	-0.777021	CCT3	-0.292229	EIF4A2	0.773156	PSMC6	-0.344377	PRRT1	-0.120505	ESR2	-0.410354	KIR3DX1	-1.30266	MGST1	1.37	LOC100134445	-0.934769	PCYT1B	-0.434138	CEP89	0.108199	ERAL1	-0.101926	NEDD1	-0.640043	NR3C1	-0.142134	FMO4	0.187846	COQ4	-0.0421726	VPS18	-0.384042	AF296124	0.38062
ERGIC1	-0.239	MRPS23	0.201	MIS18A	-0.277015	KIR3DL1	-0.315545	NEK5	0.7595	C12orf68	-0.316683	TGS1	0.907407	HSD17B8	0.147356	ARFGAP2	-0.0962821	MYBPC1	1.32106	KCNIP2	1.60436	CLCN5	0.87	MAPK12	0.425624	TET1	-0.237302	RND3	-0.120459	PRDX5	-0.0979987	POTEC	0.597695	MT1DP	0.193229	NPPA	0.135159	HIST1H2AM	0.0281566	UQCRC1	-0.488174	AL122063	0.38062
MAS1	0.117	AK5	-0.18	JPH4	0.162154	PRAMEF1	-0.172755	MRAP	0.552915	C12orf70	0.14366	SSRP1	-1.48821	VDAC1	-0.383951	BID	-0.128535	CEBPD	0.496327	LINC00839	-1.00735	AGER	0.827	SP100	-0.832068	ALG13	-0.278948	MGA	0.0710676	HERPUD1	-0.126922	SLCO4A1	1.01403	PPM1H	-0.0982475	LRRC39	-0.147695	GPRC5B	0.042462	BHLHB9	-0.480705	AF161389	0.38062
ESM1	0.171	CRYBB1	0.125	STYXL1	0.259927	ACRBP	0.79841	DLC1	-0.79519	PPP1R12A	0.42001	LOC100132999	0.756036	SGCD	0.224173	LY86	-0.246285	TNP1	0.766137	EML1	3.48062	GYPE	0.909	MUM1	-0.68468	RRP15	-0.384112	CCT6P1	0.0711832	CYTH4	-0.110579	TRMT2A	0.482927	MIR181A1	0.157443	SBK1	-0.11929	IGF2BP2	0.0484759	PRICKLE2	-0.59773	LTB	0.262429
ADI1	0.359	RBBP4	-0.217	EBF4	-0.137786	PDK4	-0.430602	NECAB1	1.70194	ANKRD45	0.169321	ZNF214	0.624821	FBXO3	-0.33732	SLC22A17	-0.137527	SMOX	0.522363	HNRNPA2B1	-1.73983	KRT7	-0.697	PSMB7	-0.741911	SKP1	-0.144436	ERV9-1	0.110861	IFIT3	-0.159528	FOXN3-AS1	0.538384	SAT2	-0.0933942	TMEFF2	0.161132	ID2	0.0326262	CTC-329H14.1	-0.571775	L11015	0.262429
SPRY3	0.0917	FAM86B3P	0.15	HIST1H4L	-0.129709	JDP2	0.489559	OLIG3	2.16589	CLDN11	-0.679342	TMEM106B	0.729131	MSRB2	0.175818	DPYSL2	-0.0871823	ETV6	0.697645	AJAP1	-2.41473	TRIM6-TRIM34	0.595	TMEM97	-0.683588	RBAK	-0.242395	FCF1	-0.0865518	UNG	0.0950838	BRI3BP	-0.963338	PDIA6	-0.141138	HOMER2	0.174275	ABHD7	-0.0600369	AC115522.3	-0.693207	ST13	0.384229
TMEM107	0.369	ILDR1	0.171	CNOT4	0.205599	ARHGEF7	-0.204638	VPS53	0.413498	KCTD9	-0.502376	CCDC113	-1.10516	PLEKHO2	0.205111	SPRYD3	-0.119692	CA11	-0.330268	NRK	-1.73793	ARL4A	1.63	SPATA13	-0.724999	ANG	0.346422	ANP32B	0.118702	L3MBTL2	-0.102123	FXR1	0.511192	IQCA1	0.197167	ADAMTS9	0.194117	RNF111	0.0304187	STMN2	-1.07596	ST13P4	0.384229
ALG13	0.202	THAP4	-0.141	MIR659	0.186724	ZNF69	-0.577706	FAM84A	1.26075	MYO3B	0.0815818	CGNL1	0.808087	MRPL3	-0.292656	ZNF682	0.184381	GABRB2	0.352152	HTR2A	2.02518	CCDC81	-0.965	C2orf68	-0.546422	LOC729815	0.148499	MRPL24	-0.0504323	GPR34	-0.184363	CDY1B	-0.858023	KLK12	-0.0973086	CDSN	0.149142	C10orf99	-0.0664504	CDK11A	0.600544	BC052982	0.384229
ESF1	-0.109	ATP6V0D1	0.488	RNA18S5	-0.414642	ATXN1	-0.173019	KLHL42	0.506468	PARN	-0.342008	SFPQ	-0.469941	CDK5RAP2	0.150336	FAM127B	-0.122651	AGAP2	-0.633455	KIAA1755	-2.38576	ARL8A	0.482	SPATA33	0.439238	NDUFB1	-0.15283	PLBD1	-0.184377	BLOC1S6	-0.108371	RLN3	-0.444663	EHHADH	0.134582	SAMD5	-0.462942	RNF167	0.039645	linc-GABRA5-7	-0.701765	AF539468	0.384229
TPP1	0.365	TBX22	0.142	ARID4A	-0.210867	NRG1	-0.604882	MRPL38	0.888993	CPAMD8	0.158065	OTUD3	0.98564	PPP1R12A	-0.307553	USP19	-0.0927163	WIPF1	-1.05859	LINC00317	1.28181	RABGAP1L	1.19	PRDX6	-0.530207	IFI16	0.542329	ARHGEF10L	0.0690737	CYTH2	-0.0846334	KIF2A	0.413561	KCNK1	-0.268915	PUM2	-0.161646	RAD50	0.0493699	MIR558	-0.703439	AF512499	0.384229
CORO1B	0.425	PPIC	0.187	UROD	0.29063	ADGRB1	0.248001	C5orf22	0.284441	C1orf86	0.36022	KCNC4	1.09826	BMP7	0.158723	SLC20A2	-0.132243	FGFBP1	-0.918812	MGAT4A	-3.46068	KPNA3	-1.68	PPP1R2	-0.686568	ZHX1	-0.264565	INO80C	-0.0542319	COQ7	-0.120315	SPDYE1	-0.803155	DNAJB6	-0.114281	MAOB	0.144436	FLJ32028	-0.0575335	C3orf55	-1.02312	ST13P5	0.384229
RNF10	0.382	PRRG1	0.126	CCDC134	0.128737	C20orf27	0.346208	PODN	-0.526613	KCNJ9	-0.666962	NDUFAF1	-1.19758	CACNA1C	0.204624	ERAP1	-0.182672	TAP1	0.475533	BAIAP2L1	2.23156	NPHP4	-0.635	NOTCH2NL	-0.669552	VCAN	0.333705	MFAP5	0.12334	NDUFV1	-0.0942387	CYP2A7	-0.602394	BCS1L	-0.13377	PLEKHA3	0.150532	HINT1	0.040851	THSD4	0.414945	C1orf111	-0.363592
TOPBP1	-0.267	LINC01096	0.132	GIMD1	0.156145	MYCL	0.215891	CECR1	0.633354	TXLNA	0.179207	WNT7B	0.742378	CCDC71	0.183412	MAGEE1	-0.111206	SOCS3	0.774727	OTC	1.53991	LRCH2	0.692	LGALSL	-0.90564	PIGK	-0.326199	VPS13A	0.109896	SNORA21	-0.113857	RERG-AS1	0.424879	GLI3	0.281819	DGCR5	-0.122113	FURIN	-0.0457772	PTP4A1P1	-0.74296	BC032957	-0.363592
FBXL13	-0.115	MFSD14B	-0.278	ARHGEF10L	-0.143171	CTAG1A	-0.20475	SUN1	0.553496	ZNF83	0.658254	ZMYM5	0.678734	RAN	-0.376557	MAP3K12	-0.154915	ACOX1	0.517535	GOLGA6A	-1.28761	SP140L	-0.999	ZNF562	-0.481222	NBN	0.46092	ZCCHC14	0.0619229	RABEPK	-0.0663345	LHX2	-1.10253	PCDHB15	-0.11456	HHIPL1	-0.146473	MKRN1	0.0289154	OCRL	-0.410947	RAB39B	0.355302
FAM63B	-0.224	NXPH2	-0.109	SOCS3	0.291377	PTBP2	-0.243921	PLXDC1	0.668433	EFNA3	0.166408	CASP1	0.309045	SMAP1	-0.320465	EMID1	0.0888548	VGF	-0.270403	RELN	1.43177	MFSD10	0.769	CD9	-1.37338	EIF3H	-0.470528	PYCARD	-0.160064	TM9SF1	-0.0827825	FBXO24	-0.505949	LSM7	-0.081066	PEX19	-0.109878	MATN2	0.0369207	BCL11B	-0.621988	Xq28	0.355302
RAD21	-0.444	FRMD3	0.47	SNORA10	0.2033	DIDO1	0.207084	NFYC	0.618623	ENSA	-0.163517	TMED1	0.579699	LMNA	0.183531	DGAT1	-0.0829802	CACNA1C	-0.734245	ST3GAL3	-1.73233	KLF4	0.825	CFAP99	0.393845	DNASE1L3	-0.334359	C1orf123	-0.0825173	MAN1A1	-0.191705	C1orf146	-0.555549	ERP29	-0.0795015	ATP6V0D2	0.158997	KCNRG	-0.0860291	TIMP1	0.564787	BC009714	0.355302
CDKN1B	0.358	PLCL2	-0.209	RESP18	-0.152805	PRSS35	0.172281	OSBPL2	0.350236	IL10RB	0.198267	PGR	0.307344	USP25	-0.263376	BACH2	-0.154256	LAMC2	-1.21269	DIXDC1	-1.36126	C2orf88	1.37	MTURN	-1.23817	LSM4	-0.227959	HNRNPA3	-0.0590536	MYADM	-0.0754189	GPATCH2	0.69847	SOX2	0.233551	DIAPH1	-0.118605	SPRR4	-0.0681596	CRYBA2	-1.3148	PGM1	0.28888
ABCC4	0.319	SOD2	0.538	STRADB	0.847886	UNG	-0.229635	EGFL6	-1.21069	FZD10	0.115269	HNRNPA1L2	-0.379772	MOAP1	-0.334892	CAMKK2	-0.148683	MTTP	0.89661	APPBP2	-2.12668	BPTF	0.557	EBLN3P	-0.80864	HIRA	0.276238	ETV5	-0.11563	PSMB7	-0.111555	ZNF251	-0.728346	CA12	0.159743	F5	-0.169186	C10orf42	0.0344652	AQP11	-0.412807	1p31	0.28888
OR5H14	-0.0947	POLR1E	-0.396	THAP5	-0.189027	ITGAL	0.223412	SNORA21	0.605135	PITPNB	-0.288122	MAP3K8	-0.159298	INS	0.232096	LYRM1	-0.12655	DENND4B	-0.247441	ATP2B3	-1.46259	ATP8A1	-0.933	REPIN1	0.738623	TAS2R14	-0.347416	IPO8	0.115302	CLPTM1L	-0.0723851	CACNA1C	-0.638043	TMEM167B	0.0957602	KIAA1671	-0.524632	RNF4	0.0400271	EHD3	-0.714348	BC019920	0.28888
N6AMT1	-0.151	CMAHP	0.217	BMPR1A	0.17499	CHRNE	0.246131	DCTN5	-0.250421	ZNF260	-0.467129	MYOCD	0.286309	KIAA0556	0.158459	BEX1	-0.154752	CASP10	0.756627	TFCP2L1	2.39319	RALGPS1	-0.767	LRRFIP1	-0.929769	RNF115	-0.268431	MRPL33	-0.0598846	NDUFS2	-0.126077	TIPARP	0.921907	SPATA2	0.0981899	FRRS1	0.133477	CARF	0.0330213	KLHDC3	-0.591549	TUBA1C	-0.458993
EMC3	0.246	WDR13	0.296	PLEK2	0.315972	PTPN20	0.199836	CNOT2	0.555112	TDG	0.401937	OFD1	0.607839	PREPL	-0.219864	TMEM219	-0.0933025	COL13A1	0.915859	TNP2	1.19261	CPNE5	0.772	SPATA42	0.255807	NCKAP1L	0.633679	UNC50	-0.0689451	DCTPP1	-0.145032	MIR206	-0.611836	MAP1LC3A	-0.0793782	ZFP69B	-0.12279	BTG3	0.0276873	DPY19L2P2	-0.602417	BC004949	-0.458993
TEX19	-0.129	IFT27	0.162	CMAHP	0.330785	PLBD2	0.241759	LOC100506083	0.39895	PKHD1	0.111522	SCLY	0.414228	NECAP1	-0.3641	CDH7	-0.201595	DDIT3	0.596721	LINC01314	-2.0297	PID1	1.02	NHLRC3	-0.71057	RBM14	-0.230471	ZNF26	0.0656158	DUSP3	-0.113063	PARP3	0.662913	SLC41A1	0.122222	LINC00184	-0.17022	STRN3	-0.040994	PLD3	-0.735888	AF081484	-0.458993
MIR1537	0.115	NUP210L	-0.151	SP5	-0.151519	LOC440895	0.209613	LRRC17	-1.35119	TSPAN10	0.148833	TGFB1	0.295066	GLI3	0.218313	FAM98C	-0.121962	ANKRD1	0.964315	CLEC12A	2.7012	UQCRC1	0.642	CLU	-1.22248	HNRNPDL	-0.247801	SLC30A7	0.0600399	SPTSSB	-0.28816	LGALS8	-0.438894	SIRPB2	-0.125862	KNCN	-0.127819	CDH1	0.0420171	PREPL	-0.618268	TUBA1B	-0.458993
H1F0	0.424	CD160	-0.736	CA1	1.49153	SH2D2A	-0.226578	ANTXR2	0.661697	RILPL2	-0.551695	CAMK2A	0.593958	TRIM23	-0.367123	GPAT3	-0.225059	GLP1R	0.645698	LINC01398	-1.93346	EVI5L	0.7	TMEM181	-0.558048	YTHDC1	-0.140584	FAM214A	0.0610548	APEH	-0.0732748	DCX	0.612274	FUT11	-0.089368	SIX2	0.109144	SERPINB8	0.0239502	CPEB3	-0.573188	C1orf220	0.27883
PIGT	0.197	ZNF674-AS1	0.122	DRC7	0.178461	MLC1	0.192383	C7orf57	1.57241	P4HB	0.576886	TIMP4	0.510494	THOC7	-0.294673	TCAF1	-0.0842056	RPL10A	0.342607	ANK1	2.41581	TSPAN17	0.56	PCBP1-AS1	-0.802793	C7orf50	0.216093	WDFY4	-0.135905	SOX2	0.202786	KLC4	-0.8897	EDDM3B	-0.093606	PPP1R2P9	-0.151326	EME1	0.0421385	EFHD2	-0.900078	BC136727	0.27883
NMT2	-0.396	KRTAP22-1	0.175	CIDECP	0.330775	RAB27A	-0.290675	FTCD	0.921939	C6orf211	0.214463	CHD5	0.767393	LDHB	-0.170774	CD14	-0.174027	CHP2	0.886945	NAGS	2.33034	OSGEP	0.587	FARP1	0.308972	LINC00957	-0.340407	SDHB	-0.0787685	SLC9B2	-0.172708	KLHL31	0.442656	VARS	-0.0881245	JRK	-0.104508	K-ALPHA-1	0.0230807	EPAS1	0.497914	IGJ	-0.860522
RALGAPA1	-0.248	GPATCH4	0.168	PARD3B	0.144315	ZBED1	0.368157	LOC105376944	-0.854728	HDGF	0.319719	RNF141	0.661168	NTSR2	0.417616	HAX1	-0.15549	CSF2RB	0.613138	NKX3-1	-1.90403	TM2D1	-0.716	NOS3	0.459352	NTMT1	-0.160596	HAUS6	0.0899048	PYDC2	0.0997302	GPR180	-0.846622	ELFN1	-0.101345	NAT8L	-0.116492	TTC1	0.102732	LMO3	-0.617572	4q21	-0.860522
ATF3	0.327	SLC3A2	0.321	SNCA	0.899949	VCPKMT	-0.331774	KNG1	0.3869	PER2	0.132852	IFT20	-1.42874	GLS	-0.589915	YEATS4	-0.137434	DMXL1	-0.656136	EVI5L	-1.48254	VEZF1	0.771	ZDHHC18	0.618851	SLC10A3	-0.232383	CTR9	0.0485436	FGF2	0.186765	EPS8L2	0.529276	PSMD8	-0.126712	CFAP43	0.190922	TWSG1	0.055005	NAPG	-0.463743	BC038982	-0.860522
CRLF1	-0.118	KCNIP4-IT1	0.136	SERPINF1	-0.29707	KCNT2	0.17944	C11orf88	0.448292	NEDD4L	0.242704	NECAP1	0.495705	ETF1	-0.220816	ZNF92	0.125242	ATP2A1	0.615639	LOC100421494	2.23554	JAM3	0.965	CHRM1	0.259275	ATXN3	-0.260619	CDON	0.140201	NIT2	-0.0886701	EBF2	-1.46073	GLDC	0.111614	COBL	-0.161864	CHCHD8	0.0267503	PLEKHB2	-0.417649	RRM2	-0.639062
GPS2	0.333	FGL2	0.436	BSG	0.829463	NOTCH4	0.230623	ACTG2	-1.36814	SLC7A8	-0.608255	PDCD1	-0.205381	PIAS2	-0.196242	TBC1D22A	-0.0892947	PTPRE	0.368915	LINC00642	-1.3307	TIMELESS	0.757	TWF2	0.273342	USE1	-0.234278	TUBB8	-0.0914028	MERTK	0.224176	UTP23	-0.620548	TRIM25	0.0991777	ERICH1	0.156423	CYP2C8	-0.0587115	SERPINE1	1.58434	S40301	-0.639062
ADGRE5	0.326	HLA-DPB2	-0.126	DNAJC21	-0.138981	GLUD1	0.248533	NBL1	-1.17385	TMEM33	0.268532	SLC25A21	0.287494	UNC50	-0.271261	CLSTN3	-0.112976	PPIE	-0.760505	LOC101927411	-1.84055	TRIO	0.67	TCTE3	-0.468446	EIF3M	-0.309944	LOC100506544	0.131612	PCBP1	-0.104252	TRADD	0.872248	HPSE	-0.0842557	ZNF664	0.100585	ARHGAP12	0.0559733	PLIN2	0.634229	HIST1H1D	0.485868
KRTAP10-11	0.135	PPP2R5E	-0.199	GFRA1	-0.15836	ZNF146	0.194665	RNF103	0.385455	SAPS2	-0.522885	UNC93B1	-0.227829	TTC38	0.182143	OR2T6	0.200469	SLC12A5	-0.46471	RNF144A	2.21756	ANO2	0.755	TAL1	-1.34257	SENP1	-0.187636	RMND5B	-0.0882815	PIK3AP1	-0.124864	SNORD45A	-0.451631	LY86	-0.302031	GPAT2	0.395251	BAD	0.0656031	SCARNA18	0.955571	BC104874	0.485868
TRAPPC2	0.198	CISD1	-0.345	ARHGEF16	-0.137492	LEXM	0.175019	HECTD1	0.371756	RUFY3	0.225434	CHD3	0.558335	FAAP100	0.212117	CYP4X1	-0.249031	IFNG	0.909706	DKFZp434E1119	-1.84615	ELK3	0.808	INTS6-AS1	-0.543604	C5orf51	-0.196817	ZBTB9	0.0871442	SACM1L	-0.159817	TXLNB	0.554937	FCER1G	-0.283174	LINC01198	0.164264	SETDB1	0.0423992	DYRK2	-0.30896	PSMD9	0.250937
LEMD3	-0.255	C1orf162	0.341	KRT27	-0.153977	TUBB4B	-0.410654	SLC5A12	1.67378	RASA1	0.282844	PPFIBP2	0.949284	RPS9	0.161269	CD4	-0.139906	LMNB2	-0.347828	ATP12A	1.25232	ARHGEF16	-0.594	LIMS1	-0.737095	ARHGAP6	-0.784884	GMCL1	0.11481	FLI1	-0.108892	POLDIP3	1.15535	FKBP1A	0.125803	METTL13	-0.145087	C9orf65	0.0243919	JOSD1	-0.386441	BC004184	0.250937
ZBED9	-0.12	SNORD54	0.212	SNORA16A	0.155207	DCK	-0.191796	TF	1.39046	FAM82B	0.454177	C14orf145	0.387938	TMED1	0.190073	GANAB	-0.0960154	UBE2D2	0.362392	LPCAT4	1.15397	AFF1	0.833	ITPKB	-0.842297	HDLBP	-0.23728	ASMT	0.126982	GBE1	-0.182603	PRICKLE3	0.651504	DCTPP1	-0.194737	EXOC5	0.112593	PRO1853	0.0709915	KCNF1	-0.872894	DBF4B	-0.401806
BAZ1A	-0.165	HLA-H	0.638	LINC01119	0.16287	DENND2D	-0.346003	POU6F2-AS2	0.553864	TCEAL6	-0.25229	PIM3	-0.75045	STAM	-0.311018	ITGB1BP1	-0.125563	GADD45A	0.457761	FHL5	3.68036	RNASEK	0.485	MED6	-0.76677	BPTF	-0.249435	CYTH4	-0.123135	RAN	-0.0845568	CLIC6	-0.577047	LAMTOR5	-0.0822579	SERTAD3	0.0996194	TGIF2LY	-0.039618	linc-ZDHHC2	0.653276	AY358101	-0.401806
RAB31	0.24	ATP10B	-0.152	EIF1B	0.660772	CCDC125	0.258929	MTG2	0.601493	RBM26	0.405989	CCNC	0.847426	LAMC3	0.190492	RNF170	-0.156716	GTF2A1	-0.796801	CDH8	-2.13153	DCAF15	0.593	ABCC3	-0.747539	CLASRP	0.42457	DENND4C	0.0561415	COG7	-0.067959	TIGD3	0.721812	TLR3	-0.171975	ARHGAP27	-0.101633	ASB14	-0.0393666	CTD-2335A18.1	-0.389354	NCRNA00115	0.232784
PCDHGA4	0.106	LOC100419583	0.321	OSBPL1A	-0.42574	DDX3Y	0.967924	TNS1	-0.739285	EIF5A	0.29816	DHRS9	0.405298	ARMCX2	-0.31468	ZNF350	0.139515	PPID	1.89586	B3GNT5	1.77824	TOP2A	0.814	FAM117B	0.408398	EWSR1	-0.152611	BTG3	0.156084	PLCD4	0.138988	TMTC2	-0.929356	NR2C2AP	-0.0932846	KIAA1429	0.217572	FKBP9	-0.0720613	IRGQ	-0.502461	ZNF596	0.232784
SP110	-0.276	JRK	-0.167	SESN3	0.549798	ERAP2	-0.489855	RBFA	-0.366195	EIF3B	-0.319184	ZNF589	0.81986	CAB39	-0.34452	BTF3P11	0.145408	OR1E1	-0.757949	APBA1	-2.12501	RAB40C	0.583	RBM43	-0.941438	SLC35G1	-0.279465	MRE11A	0.0914979	RFX4	0.212744	FAM20C	-1.06137	MSANTD4	0.0972632	PAX9	-0.220794	IRX2	0.0303437	PRDX2	-0.495887	BC017762	0.232784
TM7SF2	0.16	FKTN	-0.313	WDR26	0.332829	SEMA3E	-0.529216	GLYATL1	-0.997643	RANBP3L	0.522293	LGSN	-0.196725	MAP2K4	-0.405939	TINF2	-0.0991942	IBSP	0.88633	ABCA13	-3.81686	CELF3	0.859	DNASE2	0.382302	PXN-AS1	-0.20696	GINS2	0.11313	ZDHHC5	-0.108561	TRIM6-TRIM34	-0.789122	LPAR5	-0.122876	DYNLL2	-0.119313	TSSK1	-0.0452754	FOXO1	0.583564	SLC4A1AP	0.304295
NAA16	-0.156	LRRC28	0.248	RIOK3	0.655969	SNORD114-30	-0.189987	TSPAN3	1.39835	AGPAT5	0.331173	AAA1	0.246946	AGGF1	-0.339481	DKK1	-0.142104	MYOZ3	-0.339294	WDR86	2.17706	YME1L1	-1.06	MPHOSPH8	-0.665683	CIAPIN1	-0.232673	ZFP2	0.0606066	SAMD9	-0.139074	WBSCR28	0.560493	PPARA	0.170739	CELF4	0.154433	SLC35E1	0.0418268	MDH2	-0.490842	SUPT7L	0.304295
SNRNP27	-0.208	FBXO17	0.124	RBMS1	-0.378002	GYG1	0.274471	ZGRF1	0.543618	ANKRD20A5	0.425881	PCDHGA5	-0.280198	METAP1	-0.205198	FAIM2	-0.105602	DLST	0.468131	RADIL	-1.31058	PBX1	1.04	TULP1	0.39941	COX7B	-0.361553	DCP2	0.0995212	RUVBL2	-0.0955476	RFX3	-0.543681	GANAB	-0.117753	HSP90B1	0.339908	ZNF324	-0.0299182	PELI3	-0.528689	AY028435	0.304295
KATNB1	0.169	CCDC85A	0.126	METTL22	0.320247	BIRC3	-0.518438	SPN	-0.703615	PURA	0.174984	MAP4K1	-0.247535	FAM216A	-0.327649	NDUFS1	-0.0707461	NR2C1	0.412181	OR4D2	-2.05711	TNFAIP3	0.566	C11orf88	0.304051	FAM98C	-0.237462	KIAA0319	0.0708112	HEXIM1	-0.114457	CCDC54	0.504979	RMND5B	-0.101513	LRIG2	0.118698	NECAP1	-0.0476739	AC012370.2	-0.512595	TMEM9	0.247761
DENR	-0.213	ELF4	0.248	FIP1L1	-0.237841	XKR8	0.302603	LOC101927305	1.08212	PCYOX1	-0.573118	TIFA	1.02949	ECE1	0.164002	MGAT4B	-0.112406	ERBB3	-0.845507	ADGRF4	-1.35416	YIPF6	0.87	MBNL2	-0.870921	SART3	-0.198435	SDCCAG3	-0.0559133	TPI1	-0.109935	BTG4	0.653639	ATP13A1	-0.0751287	CDC42BPG	-0.121418	MS4A2	-0.0357312	SMYD1	-1.32801	AY359012	0.247761
MAP3K19	-0.148	ESM1	0.193	TACR2	0.160655	NUDT14	0.315281	LOC105370580	1.1232	KARS	-0.321665	DAZAP2	-0.782945	PSME3	-0.230173	COQ7	-0.130296	MINK1	-0.341974	KCNJ6	-1.41003	C6orf138	0.561	TPM1	-1.36438	GNAS	-0.289865	GON4L	0.156909	P2RY13	-0.214613	HAPLN2	0.657581	RAB31	0.221182	AMACR	-0.108718	FLJ45202	-0.0523392	PTPRT	-0.905076	BC001106	0.247761
EIF1	0.386	WRAP53	-0.238	BPGM	0.821045	MIR320A	0.186897	COL13A1	-0.873632	PSMB7	-0.376212	OTUB1	-1.03233	ANKZF1	0.219187	EIF3K	-0.0923671	NR0B2	-0.620197	ITGB8	1.07789	SPNS1	0.486	LOC101929529	0.276777	UMPS	-0.228293	TP53TG5	0.236242	KEAP1	-0.116971	RPEL1	-0.68804	LILRA1	-0.154652	P2RY13	-0.14146	ACAT1	0.0917956	PDHA1	-0.33069	AK303843	0.247761
KIAA1958	-0.17	ZNF185	0.554	NXF1	0.416153	NARF	0.358992	MDC1	-1.43328	RANBP1	-0.571839	ITSN1	-0.490952	LAMTOR3	-0.273486	METTL6	-0.111177	MYCBP2	-0.263768	SRC	-1.54408	CASC5	1.92	KANK2	0.357229	KBTBD6	-0.329123	IFNGR2	-0.0516373	SLC25A11	-0.0760385	SUMO1	-1.0016	PCDHA6	-0.101427	LINC00844	0.167599	TBX2	0.0354792	ALB	0.777906	AY138587	0.247761
COL11A2	0.149	PARD6A	-0.314	ZNF141	-0.13275	GNAT2	-0.192662	EXOC4	0.559981	C14orf180	0.125514	SVIP	-0.645167	BEX1	-0.257666	TMEM62	-0.158769	ESR1	0.941424	LOC105375773	-2.51635	KIF14	1.38	SLITRK2	0.35429	RSPRY1	-0.219502	CFAP97	0.177545	SDF2	-0.0947787	SLC26A1	0.474761	CHPT1	0.109763	C1orf61	-0.139712	SSR2	0.0527986	RP11-238K6.1	-1.1401	CR533467	0.247761
CSF3	0.1	MPP1	0.358	GNPTG	0.284596	USP21	-0.193382	KANSL1	0.889764	LTK	0.121625	TEX261	0.349831	RAPGEF3	0.152244	AGAP2	-0.146093	MAPRE1	0.295212	GABRB1	-2.84839	SAGE1	-0.737	CD44	-0.937448	RBM26	-0.328969	JAKMIP3	0.124665	CA11	-0.139651	UBE3A	0.75731	TMEM138	-0.0805027	AGBL5	-0.142781	ACOXL	-0.0528978	OSBPL10	-0.641679	AB013909	0.247761
STAG1	-0.211	FAM19A5	0.134	NOP2	0.151489	VWA1	0.165397	LINC00265	0.818144	GRIN2A	-0.646099	INHBE	0.475067	PTS	-0.273773	DOCK2	-0.140641	PDGFA	-0.719979	DOCK7	1.16044	SEMA5B	0.859	KLHL14	0.354536	APPBP2	-0.229941	ZNF7	0.0470283	NICN1	-0.0908338	MYH1	-1.2853	SOX9	0.157281	LOC105370580	0.129442	CTDSP1	0.0416198	TEX21P	0.774246	AK296307	0.247761
CNOT9	0.121	LEMD3	-0.323	KRTAP4-11	0.145069	MIR15A	-0.183485	PIGK	1.18864	CYP2U1	0.739023	DPY19L4	0.956606	ATP5J	-0.226018	UFM1	-0.153784	OR2H2	1.08423	NECTIN2	2.28908	HIST4H4	-1.21	NFATC3	-1.09034	GPANK1	-0.17218	ZC4H2	0.0540746	PSMA4	-0.168569	TCF7	0.393073	IL17RB	0.292474	LINC00261	0.109929	FAM3D	-0.0658789	PKM	-0.482043	CR457162	0.247761
BAG4	-0.243	EFNB2	0.13	RAB39A	-0.128541	ZNF639	0.209415	COL1A1	-1.60867	CEP78	0.272929	PHLDB2	1.62247	ORAI3	0.166962	NDFIP1	-0.0905498	TMED5	0.335268	CNGB3	2.58026	ABCB4	-0.944	ATG16L2	-1.0376	PRIM2	-0.232192	LARP1B	0.164305	PHAX	-0.124768	BAHD1	0.883251	KRT75	-0.0996871	PLIN5	-0.128304	EGR1	0.0304239	RAB9B	-0.571127	AK091726	0.247761
MCM8	0.0976	RBBP8	0.466	PTGS2	0.800095	WDR11	-0.702056	ACVR1B	0.971953	ZAR1L	0.13541	OAS2	0.199458	PDIA6	-0.289157	SGCB	-0.106866	ODC1	0.252958	TMIE	-2.96949	GLRX5	1.14	ANKFN1	0.263196	UBLCP1	-0.20012	ZBTB49	0.200421	TBXAS1	-0.134272	GPR22	0.656247	NISCH	0.118605	CDKN2AIP	-0.146573	STAC	0.0211491	ERG	0.636122	AK094588	0.247761
CYP51A1	-0.306	LRRC37A4P	-0.137	APBB3	0.490366	NBPF10	0.294397	GPR25	-0.822913	ALDOA	-0.260856	SLC1A2	-1.07288	CIDEA	-0.167397	WNT8A	0.11869	EPYC	-1.06913	ITGA2B	-1.64721	CMTM3	0.463	ST3GAL1	-0.515521	FAM110A	-0.28489	SYNPO	-0.0989956	EXOSC5	-0.0770284	LINC00526	-0.562714	TNIK	0.136047	PRPF18	0.150986	PDHA2	-0.0658957	NDFIP2	-0.549978	FNBP4	-0.268608
PARL	0.244	IMPA2	0.418	CTNNAL1	0.27661	INTS9	0.267113	CEACAM6	0.486591	XAGE3	0.14268	CENPC1	1.55245	DTNB	0.129175	SCN2A	-0.121586	LAMA2	-0.336263	LIN28B	-1.50403	PTCD1	-0.504	GNAZ	-1.14001	VIL1	-0.420781	IL20RB	0.0910262	RAB2B	-0.149304	FRMPD4	-0.816666	ACP7	-0.17379	LOC654841	-0.170493	RAB5A	0.0367686	PLCL2	-0.510187	AB023231	-0.268608
ITGB5	-0.126	MAGED4	0.144	RNF146	0.248041	DEFB103A	0.219067	KIAA1462	-1.15634	DCBLD2	-0.554561	HPGD	-0.166152	CD47	-0.30876	ACP7	-0.217982	RBMXL2	0.891512	LINC01432	-1.86075	MKI67	0.914	LTBP1	-1.23316	RNASE4	0.505824	CCR5	-0.190232	CLCN4	-0.157271	LPAR5	0.509065	CLEC9A	-0.13482	PRAP1	0.130958	RALA	0.0358362	SNURF	-0.540335	AF467069	-0.670032
IKZF3	-0.189	MIR146A	0.151	ARHGEF17	0.155018	SIGLEC10	0.544614	SDR42E1	1.09823	DSERG1	0.262414	DYRK1A	0.367458	HEXIM1	-0.240885	KRTAP19-5	0.143584	FASN	-0.242456	OGT	-2.31936	C20orf108	1.35	MFAP3L	-1.35798	AP5S1	-0.188699	SNRPD1	-0.0552311	OGDH	-0.0820356	SHROOM4	-0.765794	TLK2	0.080162	ITLN1	-0.139624	ZNF446	0.0462512	SNORD114-17	-0.994522	RAPGEF1	-0.670032
TNIP1	0.315	SLC39A1	0.283	CATIP	-0.164625	MRPL43	-0.20915	ZNF229	-1.08917	CCDC159	0.121987	TMEM211	-0.261333	PXN	0.176154	MIRLET7A2	0.124121	PDLIM7	-0.491084	ARHGAP42	2.49212	TMEM135	-0.954	MCTS1	-0.494526	ZNF765	-0.244455	CITED4	0.095813	CYC1	-0.0766079	CCL1	0.505518	PAMR1	0.266102	ZNF786	-0.138797	LRCH4	-0.0464328	GLT1D1	-0.636158	C4orf40	-0.3065
GALE	0.217	RAB3D	0.128	LYSMD1	-0.114791	UNC45A	-0.173563	ALDH4A1	-0.357019	OR1S2	0.142767	ASB6	0.7792	EHD2	0.149311	ZNF93	0.181889	GUSBP11	-0.835241	PRODH2	-1.76433	RNF216L	-0.832	C7orf61	0.353064	RAB5C	0.478651	PIGY	-0.0560797	FYB	-0.191922	GABRA3	0.374156	P2RY13	-0.321496	IL18BP	-0.198282	CUEDC1	-0.116482	GPRASP2	-0.667174	RPL17	0.457335
MED19	0.186	BEND2	0.325	KIAA1191	0.271269	ST13	-0.381598	CRYBB2P1	-0.601402	PTPRS	-0.43402	PDCD10	0.481143	NKIRAS2	0.135126	CNIH1	-0.0993647	RGS10	0.89534	MYCL	1.85643	TSPAN4	0.694	RNPC3	-0.95403	DCXR	-0.317716	ZNF510	0.083596	DEDD2	-0.105285	HHLA3	-1.18746	HLA-DPA1	-0.374354	MIPEP	0.250074	UBC	0.0367432	CALHM1	-1.15596	18q21	0.457335
PLXNA4	0.108	SNORD14C	0.203	CTNNBIP1	-0.137351	PDS5B	0.202534	LOC100128175	1.02187	GHRL	0.158528	LIMK2	-0.247931	CLTC	-0.239264	CA10	-0.122738	PPP2R5D	-0.293335	DTNA	2.34942	CCDC123	-1.2	ZMAT1	-0.573158	LFNG	-0.188931	TBX18	0.177617	CASD1	-0.175719	MIR124-2HG	0.572121	JADE2	-0.129032	LPL	-0.148201	USP7	-0.0744068	RP11-183E9.2	-0.876519	SNORD58B	0.457335
BCL2L13	0.2	MIR216A	-0.123	GPR88	0.176315	CYB561	-0.235199	SIX1	-1.79693	NR2F2	0.096308	ZFAND5	-0.32231	DLAT	-0.320571	PDSS2	-0.142796	MSI1	1.02513	GJB1	1.9065	LRP3	0.52	IGF2BP3	-1.2968	ZNF268	-0.296473	ING2	-0.0576595	VCAM1	-0.237276	MZF1-AS1	0.64108	PKD1L3	0.116054	MAP3K7	0.179808	FLJ38725	0.0318895	AMOTL1	-0.3565	SNORD58A	0.457335
ZNF573	-0.331	CUL1	0.265	KIAA1683	-0.300239	SOX13	-0.216357	GPR61	0.673535	SYNRG	-0.153829	TARDBP	-0.478122	EIF2S2	-0.267371	GPLD1	-0.15629	PTEN	0.398935	ADAMTS9-AS2	2.94895	GNAZ	0.941	UFM1	-0.559929	RNASEH2B	-0.251032	CFAP53	0.114577	PTS	-0.140662	DNAH3	0.700164	SLC6A11	0.22474	EGR1	0.272965	GCG	-0.0289911	TUBA1B	-0.603197	BC000502	0.457335
TCN2	0.211	C2	0.257	CDK13	-0.345051	PIK3C2B	-0.221551	GMFG	0.776587	SOX13	0.17604	FLYWCH2	-0.598768	PROP1	0.192163	MPI	-0.111384	TRIO	-0.247582	LOC101927610	2.08506	NDUFS8	0.551	GFOD1	-0.68347	COBLL1	-0.366733	KLHL4	0.0761353	LINC01152	0.119133	CD79A	0.743134	CD53	-0.312294	LOC101929536	0.145439	GABRG3	-0.0550082	TUBA4A	-0.935563	AK130753	-0.29766
N4BP2L2	0.132	GNL3L	-0.314	IER5L	0.172981	ADAM22	0.166545	COQ8A	1.19447	CFLAR	0.2312	PRSS3	1.18724	CRH	-0.507851	SLC25A12	-0.114605	GDF7	-0.399733	PTPRN2	1.74669	KCNH2	0.641	FDFT1	-0.812942	PLEKHG4	-0.250787	CREB3L3	0.104991	CYTIP	-0.133045	HSPE1	-1.15427	ACVR1	-0.0966816	ZNF483	0.119946	GRIA4	0.0748287	RP11-218M11.1	-1.38527	FLJ27243	-0.29766
GOLGA6L22	-0.141	MLST8	0.196	EQTN	-0.137484	DNAH12	-0.154297	SCFD1	1.14427	ATP5A1	-0.157735	OTUD4	1.09813	ITGA7	0.216923	FAM105A	0.145489	NOL7	0.322888	LINC00527	1.60848	SUPT4H1	0.508	MYLK	0.387945	PLEKHA3	-0.220351	GMFG	-0.0804232	MTCH2	-0.108548	ANKRD13D	-1.02154	APCDD1	0.205396	C11orf58	-0.148382	CRYGC	-0.0522792	MT-CO3	1.06502	SUV39H2	0.240446
RUNDC3A	0.0999	FAM133B	-0.359	RASD1	0.475838	KRTAP22-1	0.199956	PID1	-1.00502	P2RY11	-0.318644	IQCJ	0.419706	L3MBTL1	0.187527	RPS6KA3	-0.123981	PPP1R12A	-0.318403	NOSTRIN	-1.9583	PPP2R5B	0.704	ZC3H18	0.444993	TYSND1	-0.257856	CXCL12	-0.084737	RHOBTB3	0.203437	STRC	-0.579402	TMEM65	-0.15695	DMRT2	0.105292	TGFB3	0.048113	AP2A1	-0.523567	10p13	0.240446
DDX27	-0.425	CORO1B	0.507	WDSUB1	-0.298385	MISP3	0.199144	CSTF2T	-0.256259	HIF1A	0.256526	CPA2	-0.238077	ITPR2	0.285357	ZYX	-0.13344	KRT6A	0.712396	LOC101929174	1.14228	FLJ16171	0.737	JAK1	-0.792513	ITGB8	-0.3482	MEPCE	-0.0817951	PLEK	-0.156825	OR4K13	-0.617753	MRPL48	-0.135377	DGCR2	0.132219	COX11	0.0498072	TULP3	0.45834	BC007754	0.240446
GBP5	0.434	RLN1	-0.127	OPTN	0.336221	SLC29A4	-0.207731	TMEM119	-0.861192	P2RX6	0.197836	CHL1	0.245731	AGPAT2	0.152344	ERCC1	-0.105663	DNAJC24	0.778306	DCX	-2.15528	CDK4	0.47	PP12613	0.394775	PCP2	-0.2918	GK	0.0769124	BANF1	-0.0938294	SNORA36A	-0.598273	CENPJ	0.1459	ZNF823	-0.203914	GABRA1	0.022487	MT1A	1.18848	BC029360	0.240446
METTL22	0.25	GEM	-0.174	DCAF6	0.220999	ZNF266	0.300134	IGKC	0.341666	EHD3	-0.494791	ATP5E	0.44075	STAU2	-0.279676	ANAPC7	-0.110831	IGFALS	-0.289624	OPRM1	2.0186	YIF1B	0.675	RPAIN	-0.510243	SUCLG2	-0.303212	CEP164	0.079212	IGF1	-0.108352	CLCN5	0.742121	CD37	-0.147954	CRB1	-0.129546	TIMM9	0.0606602	SOCS2	-0.473918	CR457372	0.240446
EIF2B1	0.172	CYFIP1	0.256	C3orf14	0.192347	NANOS1	0.205485	MYH14	0.357104	SPSB3	0.16968	ASPH	0.566323	ALDH1A2	0.18795	IVD	-0.117286	PIGO	0.645005	FOXD3	-2.31151	HAPLN4	0.735	PHOSPHO2	-0.69437	TAF4	-0.224256	FIGN	0.143416	FGF11	0.0800572	RSPH10B	0.467107	KEAP1	-0.0994999	DHX32	0.157037	C14orf29	-0.0448381	NDRG4	-0.774465	HK2	0.309242
KRT27	-0.114	AP3D1	0.243	SLC25A36	-0.2375	LCE5A	-0.224119	ZNF506	-0.877289	BCAP29	0.340487	CWF19L2	0.824401	TUSC3	-0.505152	YTHDF1	0.089502	DOT1L	-0.765225	CLCN4	1.12884	ADAMTSL4	0.587	LOC101928535	0.269958	DCAF8	-0.213613	KIF27	0.0646053	C6orf62	-0.0939259	CYP11B1	0.507412	PDP2	0.110755	FBXO4	0.118785	SLC36A3	-0.0382674	RP11-713C5.1	-0.860348	2p13	0.309242
TTC39A	0.112	PLBD1	0.449	PSD3	-0.147368	FDFT1	-0.265791	TOR2A	0.476229	ANKS1A	0.494037	ILF3	1.03364	HPF1	-0.230717	HIST1H4A	0.268271	CCT6B	1.03597	NR6A1	-2.36178	NOS3	0.489	EIF3C	-1.02349	PPP1R2	-0.228012	ZNF700	0.0738225	NT5C3B	-0.109798	PDZD3	-0.666334	RERG	0.259223	LINC01350	-0.134952	GALR1	0.0259806	PPP2R1A	-0.538531	BC064369	0.309242
CKS2	0.334	STRIP2	0.127	OR51S1	0.132664	HOPX	-0.691792	LOC101926916	0.525714	PPM1K	0.467476	PPA2	0.514389	ZRSR2	0.189392	PPIG	-0.0846863	IDUA	-0.364565	LOC100506844	1.01715	TOM1L1	2.14	CNTFR-AS1	0.303769	SNORA72	-0.207593	MICAL1	-0.0921322	TIMP3	0.16845	TMEM246	1.11355	USF1	-0.111481	LOC105377458	0.118298	COPS4	0.0288457	FIBP	-0.316962	ID3	0.33435
SGK3	-0.505	METTL26	0.233	MYBBP1A	-0.145026	FAM96A	0.256214	GNB5	1.05232	MAPRE2	-0.529682	SMAD6	-0.196261	TPD52	-0.55403	OXCT1	-0.117463	ADORA3	-0.730073	TSKU	-1.52022	STARD8	1.46	LILRA2	0.758483	ABLIM1	-0.316659	FAM24A	0.240223	ACSBG1	0.20523	SH2D6	0.656013	LCP1	-0.334317	CABP4	-0.125801	HAND2	0.0258498	KIAA0317	-0.271186	BC003107	0.33435
BTN2A2	-0.109	INTS6	-0.288	VPS28	0.296522	IL17RC	-0.242865	NFIX	-1.82909	CIRBP	-0.16548	MPEG1	-0.2464	MTMR14	0.138951	SAT2	-0.105734	PKP4	-0.243319	SPINK6	2.87615	BAT5	0.518	IGFBP7	-0.881947	PNPO	-0.234931	LIMA1	0.0886828	RXRA	0.0814202	SLC9A4	0.588987	HSP90AA4P	-0.114438	TBC1D10B	-0.100352	CGI-115	0.0306312	SYT13	-1.01182	PSMA8	0.260338
C4orf19	0.127	TTYH2	0.222	TRIM58	0.754032	LCN15	-0.195891	TMEM139	0.371839	ALPPL2	0.140703	BPTF	-1.37956	PLEKHB2	-0.212546	LETMD1	-0.130386	PLCB2	-0.255617	FZD9	1.68428	HMMR	1.35	WDR11	-1.40644	TPK1	-0.193094	PTCD2	0.0706765	KREMEN1	0.086736	SLC26A6	-0.700464	SCAF4	0.0782698	KIAA2026	0.100884	YWHAE	0.0338588	KIAA1045	-1.02123	DHFR	0.260338
SNORD4B	-0.135	TPP1	0.45	ZNF253	0.156872	CECR1	0.310776	ZNF674	1.20125	TACO1	-0.565471	COIL	-0.710975	GOLT1B	-0.303997	FAM149A	-0.143001	RPL11	0.286243	RPRD1A	0.929115	SGK494	-0.539	CHD9	-0.750369	MTMR12	-0.197085	DZIP1	0.0781548	CFI	-0.107625	CDRT15P2	0.991046	ARFGAP2	-0.0992548	ZNF763	-0.125033	FLJ32447	0.0273597	GLRB	-0.701267	BC021713	0.260338
GMPR2	0.167	MSANTD2	-0.184	FAM46C	0.992902	EFNB2	0.149605	SHOX	-0.981883	NCAPG2	0.287589	SACM1L	1.38034	HMGCR	-0.443682	C1orf123	-0.170502	AATK	-0.305576	GPER1	3.07155	ARHGAP6	0.981	OARD1	-0.584942	AGO3	-0.248973	PTPRC	-0.146962	GNPDA1	-0.107485	FCHSD1	0.87986	EIF4EBP2	0.113378	PP14571	0.150538	C4orf6	-0.0670557	RP11-728G15.1	-1.03458	TCEAL8	0.44829
CDSN	0.092	MEX3A	0.177	PINK1	0.381852	BCKDHB	-0.216309	MED26	-0.674016	APOL2	-0.372972	PPP1CC	0.619027	HIVEP2	-0.393053	MXI1	0.0758307	ARRB2	-0.282613	ANKRD40	2.88282	JAG1	0.644	LUC7L	-0.459292	ALKBH7	-0.264	CD33	-0.181784	TEX15	0.130961	SLITRK1	0.740584	FREM2	0.311076	FAM151A	0.169857	TSPAN16	-0.111278	WEE1	0.548831	BC035573	0.44829
SLMAP	-0.203	N4BP2L2	0.135	ALDH3A2	0.197405	STMN4	0.154246	EBLN2	0.724653	CCDC47	-0.457608	CDK16	-0.877453	PELP1	0.179827	TECR	-0.116565	PDHB	0.280022	INO80D	-1.64669	UBE3B	-1.42	PRKAR2B	-1.16913	LOC642852	-0.26677	WDR78	0.119996	NALCN	-0.0912033	MTUS1	-1.09273	SYK	-0.159578	ZBTB18	-0.146191	OSBPL1A	0.0526371	USP5	-0.421582	BTNL8	0.679557
NEDD9	0.12	AGAP6	-0.406	HBM	1.26696	ZFP42	-0.159038	TEX9	1.1426	MIA3	-0.691696	APH1A	0.48801	RRAGA	-0.20979	ADSS	-0.100966	RFXANK	0.668356	ATP8B3	-2.91782	NUP62CL	1.11	SAPCD2	-0.354636	ZNF320	-0.37494	APOL6	-0.204436	DNAJC27	-0.120794	TAB1	-0.501935	CSF1R	-0.257621	CCDC187	-0.109487	RAD52B	0.0355687	TSPAN13	-0.805584	AY358523	0.679557
C1orf174	-0.171	FOXJ3	-0.292	OTUD6B	-0.158657	SPRY4	0.222887	RHOB	-0.791141	VPS13C	0.574046	RASGRP4	0.515901	MT1G	0.412385	GSS	-0.102611	CTSS	-1.22221	CENPN	1.99257	PECI	-1.3	RUFY3	-0.861613	ZKSCAN7	-0.362973	MSR1	-0.16218	CPNE6	-0.148594	APBA2	0.431403	ACAT2	-0.199523	ENPEP	-0.186473	MACF1	0.153536	RNF128	-0.633127	NUDT9	0.23128
MARCH5	0.138	GRIA3	0.16	UBXN6	0.500487	ATF6B	0.159581	ATAD2B	0.372478	KIF5A	-0.419668	SMOX	0.745578	SLC25A4	-0.303866	BIN3-IT1	0.165417	MYB	0.887673	RAB6B	-2.52413	COX6C	1.59	LOC143286	0.292736	RHBDD1	-0.276991	SERBP1	0.0977835	PSMD14	-0.110418	F13A1	-0.471653	DNAJB12	-0.0799564	IFITM10	0.144561	HIG2	0.0328006	NPFFR2	-1.1357	AY026252	0.23128
SF3B1	-0.278	SLC16A2	0.165	NBPF1	-0.158382	SLC31A2	0.578131	GSK3B	0.299207	DES	0.161619	ALDH1L2	0.967851	KIF2A	-0.307681	LDLRAD4	-0.113069	HCG9	-0.345132	DKFZp779M0652	-1.55994	RAD23A	0.582	WDPCP	-0.559418	GTF2IRD2	-0.165759	LIFR	0.124586	ARMC6	-0.119695	PRKCB	-0.701654	PIWIL1	0.107902	FTX	-0.194635	TMTC4	-0.0498233	QRFPR	-0.859311	F5	0.505626
SNRK	-0.253	SERPINA1	0.708	USP1	-0.232848	KLHL24	-0.275845	NXF5	0.67155	SSFA2	0.605527	AKIRIN2	1.31936	AMD1	-0.256652	MAEA	-0.096011	BAZ1A	-0.949059	CHN2	-1.9679	WBP2	0.495	GPR4	0.411257	RYK	-0.221232	SGIP1	0.0828768	EEF1B2	-0.0634597	SLC5A10	-0.574368	SPON1	0.275482	CRABP1	0.150875	FLJ45645	0.0431448	HK1	-0.713397	M14335	0.505626
FCN2	0.0862	HIST1H2BI	0.117	FOXO4	0.355457	PEPD	0.360263	BMS1P5	0.553137	GTF2H1	0.317574	NAT8B	-0.171172	C3orf14	-0.297086	MT1H	0.185284	ENPP1	1.02781	DYNLRB2	2.94246	CISD2	1.38	ZNRF1	0.361262	TMEM212	0.195103	CD69	-0.184352	HDHD2	-0.137276	CBX2	0.667587	GMEB1	-0.138564	RPS10	0.248379	SLC16A9	-0.0602321	RP11-145G20.1	-0.524394	DSEL	0.321388
RNMT	0.192	ARMCX6	0.177	USP17L27	-0.165515	PPP4R4	-0.205516	TTLL5	0.274021	CCDC85B	0.120575	SLC23A1	0.195766	RPS6KA3	-0.274293	ABHD16A	-0.0789139	CALCOCO2	0.302683	LINC01000	1.79087	FIZ1	0.908	CCAR1	-0.635602	COPS6	-0.193532	PYGB	0.0726111	FLOT1	-0.0750371	OCLM	-0.49543	TKFC	-0.0728149	TTC26	-0.207667	SOCS2	0.0355432	UCK2	-0.356714	AF480435	0.321388
UBE2D2	-0.273	RPL17	0.175	HEMGN	0.284878	XRN2	-0.586785	SLFN5	-0.662306	RPL23AP82	-0.760829	NCOA7	-0.424283	RBFOX2	0.178318	ABCB7	-0.114	BTN1A1	0.840069	EFNA2	-1.89201	MSRA	0.492	SSPO	0.338621	ZNF710	0.190211	KIF13B	0.119435	NR4A2	-0.355235	PCBP2	-1.08276	DCHS2	0.158637	CBX8	0.11179	CENTD1	0.0705431	ATP6V1B2	-0.70517	LOC643542	0.321388
GFOD1	-0.358	JAGN1	0.163	RBM4	-0.145442	INO80C	-0.182551	LOC101929297	0.833407	ANAPC11	-0.290944	CBX5	-0.416624	NFU1	-0.288026	VASH1	-0.109238	EIF6	-0.273922	LOC105373150	-1.98192	ZNF586	-0.698	SAMHD1	-1.25692	RABEP2	-0.29706	EHMT1	0.0830999	SDC3	0.101716	SFTPB	0.541809	NODAL	-0.0953467	ASCL2	-0.159182	FLJ39822	0.0728868	MAP2K4	-0.48611	ZNF286A	0.46196
PKP2	0.104	FBXL13	-0.137	HLA-A	0.277121	TFAP2D	0.177602	DDR2	-1.34846	MADD	-0.429497	MAPRE2	-0.819861	PCBP2	0.156893	TFCP2L1	0.153916	GOLGA3	-0.205994	MSL1	1.31459	PKHD1L1	0.8	ZNF559	-0.425223	RABGAP1	-0.169115	LOC439938	0.11527	LAIR1	-0.121494	FAM212B	-1.71078	VNN1	-0.118744	PPP1R37	-0.132839	NEK2	0.0433717	RP11-327L3.1	0.614656	ZNF286B	0.46196
HEATR6	-0.317	TUBA3D	0.337	DMRT3	-0.136226	MYO1B	-0.216623	EFHB	1.35539	RPS27A	-0.253933	SCAI	0.492102	CUL3	-0.258826	IDH3G	-0.102402	RAB3A	-0.80199	PPP2R2C	1.52288	CACHD1	0.636	RIBC2	0.354128	GREM2	0.169678	TECPR2	0.0573321	CXCR4	-0.17821	CCDC42	-0.914867	ALG14	-0.11461	KAZN	-0.141605	ATPIF1	0.0365743	ARMCX2	-0.425831	AF217226	0.46196
KHDC3L	0.114	SNORA41	0.222	SNORA67	0.484164	HMGCLL1	-0.162038	ZNF568	-0.512138	NKAIN1	-0.628717	PAFAH1B2	0.380491	DIXDC1	-0.41637	CADPS2	-0.125965	CASK	0.346174	RAMP2	-1.95408	ASXL2	0.521	ITGB5	-1.14972	HNRNPL	-0.43395	RNF219	0.061481	MED11	-0.0828322	DLX1	1.04515	FDPS	-0.133279	TMEM74B	-0.219039	MGC48595	-0.0472172	ATP1A3	-1.0975	AB058777	0.46196
TSSK4	-0.124	DPYSL2	0.345	PTPN11	-0.218268	PIN4P1	-0.223151	NYNRIN	-0.767831	PIK3C2B	-0.522048	GRAMD4	0.455567	RPS19	0.230058	ALG13	-0.121988	COL4A6	-0.67335	RRS1-AS1	-2.4687	TLL1	0.948	DLL4	0.368538	CHRM3-AS2	-0.498968	RBL2	0.0694283	MT1G	0.372612	ANO10	0.61881	GIMAP8	-0.113628	SLC6A19	0.108	QKI	0.0428765	FAM219B	-0.285777	TBC1D26	0.46196
SRP14	0.229	BACE1	0.123	MTMR2	0.163222	ACVR1B	0.276632	SAR1B	0.453458	CDCP1	0.147528	ANKDD1A	-1.31752	MTX2	-0.285197	AP2M1	-0.0844797	DGCR9	-0.338682	FAT3	-1.70164	ATP13A4	0.687	UNC79	0.352408	TC2N	-0.314257	NPNT	-0.135355	NDUFAF1	-0.135933	TTTY9A	-0.40249	PIGL	-0.0932025	TNFRSF10A	-0.184003	RANBP6	0.049435	MCHR1	-0.840287	X52357	0.46196
FXYD5	0.37	GPATCH11	-0.129	KIR2DL5B	0.153248	TIMP4	-0.169252	USP46	0.777955	SP6	0.151041	CSTF3	-0.417835	NIF3L1	-0.263122	CUL7	-0.10302	S100A11	-0.769615	TAS2R9	-0.913507	C11orf61	-1.05	KSR1	-0.533132	TBL1XR1	-0.136057	ZNF818P	0.154824	ACTR2	-0.0893349	AGR2	-0.457865	UQCRQ	-0.0683596	ARMCX4	-0.182598	HOXD3	0.0597584	PPP2R5D	-0.458939	ZNF29P	0.46196
CLDN9	0.0965	CHMP2A	0.401	IL32	0.501759	MGST2	0.365917	TRIM61	0.921949	ASAP1	-0.379359	HSPH1	-0.395603	AGTPBP1	-0.240427	ATXN7L1	-0.121251	ST6GAL1	-0.339224	ANO6	-0.813332	C19orf26	0.674	AGXT	0.403939	RBM4B	-0.167333	LHFPL3	0.117008	TMUB2	-0.109162	TAF1A	0.821451	CD68	-0.207375	LOC101928098	0.108745	PAX3	0.0302164	C19orf12	-0.484884	17p12	0.46196
TSHZ1	-0.196	DIO2	0.156	MAP3K2	0.174651	ATAT1	-0.177966	BDH1	-0.4627	PDXK	-0.503459	TAF1A	0.361128	API5	-0.297489	CHMP2A	-0.0907897	AES	-0.40748	PPIL6	-0.87941	CLNK	-0.959	KCNN4	0.536978	SEC31A	-0.208457	CAB39L	0.129483	ARL2BP	-0.101336	ST6GALNAC5	1.65416	ADAM20P1	0.203213	FAM49B	-0.188766	SLC43A1	0.0439077	SH3GL2	-0.962936	BC022007	0.287292
NDUFB5	0.158	AIF1	0.544	TMEM245	0.295728	VTRNA1-1	-0.276432	STK24	0.827777	PGLYRP4	0.136414	METTL13	1.38089	DCAF6	-0.371061	EXOC2	-0.0978147	PMS2P5	-0.688239	SCARNA2	-2.12118	PAIP2	0.758	DTWD1	-0.624371	BUD13	-0.168613	PROCR	-0.141644	NDUFA9	-0.148991	CXCL5	-0.619098	MTO1	-0.13712	CLCN4	-0.17371	ERV3	-0.0411695	NECAP1	-0.543754	C6orf64	0.287292
ZSCAN4	0.0971	NOTCH4	0.169	HDAC7	0.160626	CCDC85B	0.260751	IFNA4	-0.952274	ZNF549	0.41369	PAAF1	-1.2871	HECA	-0.223065	SCN3A	-0.191667	MUTYH	-0.743282	PDIA2	-0.990421	MAF1	0.622	FOXP1	-0.664942	TANK	0.271284	CTAGE3P	0.108612	VOPP1	-0.0602252	RTN4RL2	-0.398573	ASPH	0.15407	HCRT	-0.153386	DEK	0.0446236	GPD1L	-0.408098	KRTAP10-12	0.423882
FKBP15	0.181	NAA16	-0.193	RAP1GAP	0.823615	SDR16C5	0.17836	LYRM7	-0.324063	TMEM18	-0.570984	ARID4B	-0.793235	AQP3	0.17295	DMD	-0.14892	TAF13	-1.00944	ANO4	1.30222	PI4KB	0.574	B9D1	0.314625	THAP2	-0.277522	MRPL34	-0.0577164	TUBGCP5	-0.121053	KCND3	-0.570266	EPB41L5	0.120331	EVI5L	-0.12494	THAP10	0.0392767	MYO5A	-0.598303	KRTAP10-4	0.423882
LINC00689	-0.113	GDA	0.158	RUVBL1	0.122359	RNF144B	0.419389	COL15A1	-0.991921	HES1	0.141454	HINFP	0.362316	NUP188	0.191117	SMCO3	0.121137	AP3B2	-0.427882	SLC5A1	1.64215	BCL3	0.674	SH3BGRL2	-1.34431	SCAMP1-AS1	-0.243261	ERCC5	0.0615545	NCSTN	-0.118512	HSF5	0.509057	LRRC8A	0.116692	ZNF543	-0.218844	GDF9	-0.0764323	TNIP3	-1.06544	KRTAP10-6	0.423882
RHD	0.122	ST18	0.147	GRK6	0.139042	SSX4	-0.223833	S100A6	0.967726	TIAL1	-0.442291	MRPS21	0.374338	DHX58	0.163134	DLGAP1	-0.159557	STAT6	-0.392725	SIX6	-2.21763	GNL1	0.524	CCDC37-AS1	0.350316	SAFB2	-0.213362	GALT	-0.0670083	CNPY3	-0.0680728	SNORD21	-1.02452	LOC613266	-0.0842153	KCNC3	0.151731	KCNE1L	-0.038178	AC067945.3	0.703892	KRTAP10-7	0.423882
PHKA2	-0.239	SMARCD3	0.291	CSAD	0.16168	KIFAP3	-0.339262	LINC00051	0.699162	FGFR1	0.333216	ZHX1	0.773216	FTL	0.163811	ZNF729	0.128448	ALDH3B2	-0.883235	HPSE2	2.493	MAP1LC3B	0.577	KIAA1652	0.378139	PEX11B	-0.175405	AMZ1	0.107496	DHRS9	-0.0841987	STX1B	-0.49876	GID4	0.0789891	LOC105372550	-0.134492	KIRREL2	0.0409523	ELOVL4	-0.739142	AB076364	0.423882
NEU1	0.233	HCK	0.487	SP4	-0.319003	TCP1	-0.236714	ZNF677	-0.477934	CNTFR	0.268201	GABRA1	0.26469	VSNL1	-0.756954	MEGF11	-0.103554	CST7	0.820068	TMPRSS11E	1.58943	ZBTB22	0.819	MLX	0.31208	HPGD	-0.513408	HCN3	0.0881001	ARHGEF2	-0.0964644	GALNT13	-0.491543	RASGRF1	-0.121993	NFAT5	0.171174	MYBBP1A	0.0554062	ZDHHC22	-0.580098	BC137339	0.423882
WDR13	0.223	MAFA	-0.136	CLTCL1	0.167642	MAGEB18	-0.215874	SPATA13	0.442018	TFPI	0.204865	SGSM2	0.663208	HSPA13	-0.367115	QTRT1	-0.100879	PTPRCAP	-0.574916	PDE6B	-1.9734	POMT1	1.76	ANGEL2	-0.335476	MYO5B	0.146037	ZNF131	0.0671708	BCR	0.0832691	PAX8	0.919975	TMEM68	-0.140287	CAMSAP3	-0.212121	ZNF426	0.0278095	CLSTN1	-0.607768	BC137341	0.423882
ZCCHC6	-0.258	NAT2	0.118	SDR16C5	-0.116365	TMEM218	0.19281	NFIC	-0.506737	GRHL2	0.140585	GLUL	-1.30516	FAM69A	-0.224543	ARF3	-0.0817767	MUC2	-0.573677	MGAT3	1.18206	SUMO3	0.687	ARHGAP6	-1.48268	ZNF507	-0.241388	POLR3A	0.0943063	NUP93	-0.0985281	GPR4	-0.451215	ZNF732	0.0806226	ARFGEF1	0.12862	HAT1	-0.0507995	DNAJC18	-0.266938	BC119643	0.423882
NFATC1	-0.207	WHSC1	0.105	SERAC1	0.184564	FGFBP2	-0.775349	DENND1A	0.423869	PITPNA	-0.379593	TDP2	0.788604	SCG2	-0.417408	ZNF146	0.104437	MVK	-0.204745	HOXB8	0.808341	ZFYVE9	-0.873	RUSC1-AS1	-0.911301	ASH1L-AS1	-0.208192	TCF7	0.186831	LYRM1	-0.125637	RAMP2	0.836728	ZNF107	0.108569	ZNF595	-0.881319	MEG3	-0.0478257	LONRF2	-0.726896	AB076353	0.423882
FAM199X	-0.137	PLEKHM2	0.298	TNRC6C	-0.254464	XRCC2	-0.671431	KRT27	0.851312	LRRC8E	0.121497	MRE11A	1.05164	PSMD12	-0.3242	NIT2	-0.13181	SUMO4	0.241057	LOC101929378	2.30363	PALM2-AKAP2	-0.768	TGM2	0.381745	HP1BP3	-0.161393	METTL25	0.128541	ARHGEF26	0.189083	MED26	0.474903	FGF11	0.112919	KCTD13	0.177392	HPS1	-0.0283273	B4GALT1	0.446673	AB076354	0.423882
WTAP	-0.176	SLC2A9	0.254	INHBA	-0.132206	CEP63	-0.169947	FN1	-1.08108	ARHGDIG	-0.441799	CYP4V2	-0.757625	ALS2CL	0.17034	CBLN3	-0.292244	FANCL	-0.401164	SLC35D2	-1.47338	PPM1N	0.846	AHSA2	-0.525384	IPO7	-0.276395	LINC00094	-0.0513768	EHMT2	-0.0748816	IGFLR1	-0.702618	SHISA6	0.231219	TIAL1	-0.10575	LOC129138	0.022501	ST3GAL1	-0.389975	GPRC5D	-0.391986
KCNIP4-IT1	0.105	TET1	-0.141	GALNTL6	0.137257	MAP2K3	0.182381	KCNK2	-1.17358	DCK	0.52134	LRRTM3	1.03564	PGC	0.151391	CCDC43	-0.141558	SULT1B1	0.811871	LOC153682	-0.983325	PRC1	1.36	GTF3A	-0.654948	EXOSC6	-0.236634	STRN	0.0691368	GPR75	0.115561	CD163L1	-2.33892	ZNF257	0.173407	PTPN23	0.118771	SAGE1	-0.0467032	BRI3BP	-0.383943	BC107077	-0.391986
BTG2	0.39	SAMD3	-0.278	MKRN1	0.423221	YIF1A	0.235965	MEGF10	-0.732731	CCDC87	-0.390284	PIK3R1	0.53008	SDHB	-0.29326	TANGO6	-0.171472	IFNA10	-0.757218	MIP	2.03666	UBE2C	1.21	ANXA11	0.285887	SERPINB10	0.406593	LEFTY1	0.0883856	SAMSN1	-0.10285	TAF1D	-0.804837	ANP32D	0.117839	ATP11A-AS1	0.146851	FRAP1	0.0380491	C8orf34	-0.634998	HIST1H2BJ	0.354418
WIPI2	0.206	LOC105377443	0.168	NRXN1	-0.128578	ID3	-0.284401	IL18BP	0.823324	TRMT61B	-0.476981	SMAP1	0.541884	TM6SF1	-0.425017	CAPN7	0.124105	PMS2P3	0.673193	SLC8A1	-2.39081	UBE2E3	1.26	RAB18	-0.795788	ZEB1	-0.223054	APOL3	-0.0919591	APEX1	-0.103156	FRA10AC1	0.900762	DNAJC27	-0.150297	MDH1B	0.146449	WNT3	0.0324611	GUCY1A2	-0.59711	NDUFA8	0.303565
FARS2	0.169	ZMYND8	0.136	RNF32	-0.141278	CAMK1D	-0.178669	SNORD114-3	0.899119	CDC26	-0.697778	IL2RB	0.204631	RASA1	-0.459227	CTPS2	-0.166552	MRPS31	0.353113	DGKB	-2.22436	AKR1E2	0.688	DTNBP1	-0.413506	ZMAT3	-0.172409	ZNF808	0.0897337	ATL1	-0.189827	RYR1	-0.589362	H2AFJ	0.127351	LOC105375172	-0.232903	HOXA11	0.0295453	ANXA3	0.648559	AF044953	0.303565
MRPL11	0.135	ANO7	0.123	ADIPOR1	0.727641	SLC25A29	0.217676	ITGB1BP1	-0.367803	RNPC3	0.492426	PLSCR1	0.706806	RIT2	-0.422208	NBN	-0.121802	MKRN1	0.255954	SLC25A27	-2.1552	RAB6C	0.988	ZBTB43	-0.580835	COPG1	-0.397283	PRKAR2A	0.119654	TNFSF10	-0.230123	TP53TG3	-1.72354	BAHD1	0.0977207	FOXN1	-0.145406	MSC	0.0529401	VDAC1	-0.559447	DSTNP2	0.481813
MAMSTR	0.0968	NFYC-AS1	-0.124	HMBS	0.427739	NSL1	-0.207966	KLF9	-0.610714	PARP14	0.198404	HHAT	0.614321	AK6	-0.218167	PDHB	-0.131167	BTF3	0.207217	SLC39A12	-2.29175	CALM3	0.569	PEAR1	-1.06101	ZNF677	-0.443044	DPP3	-0.101938	ERICH3	-0.213101	KRTAP9-3	-0.442945	RGS20	0.186923	RPLP2	0.194134	CASQ1	-0.055622	TUBB3	-0.834951	U72518	0.481813
ALOX5	0.137	TMEM181	-0.369	QDPR	-0.207882	PEX26	-0.195472	STAG3L4	0.35951	CHAD	0.138489	GALNT5	0.175821	MOB4	-0.224752	OGDH	-0.114968	ARHGAP1	-0.232629	MLF1	2.35709	PTPN18	0.584	ELOVL7	-1.40061	PPAT	-0.236868	FLI1	-0.10362	ANKRD30BP3	-0.0767758	GGA1	0.376731	CLMP	-0.170816	LOC100507389	0.237708	HOXD4	0.0317301	PNMAL1	-0.734216	HIST1H3A	0.5378
GCN1	-0.227	TES	-0.219	MGMT	-0.301504	KDM2B	0.215387	SNORA65	0.371485	UTP3	0.318777	DERA	0.960611	RND3	-0.32173	HLA-DPB1	-0.157287	ERCC2	-0.338514	MSRA	-2.40422	RNF182	2.61	IDI1	-0.733859	TXLNGY	-0.20809	DHX57	0.0620168	WFS1	0.0971049	MORC1	-0.871913	OR6C76	-0.130764	EFCAB14	-0.137884	NRN1	0.04394	HTR7P1	-0.561424	BC066245	0.5378
ITIH5	-0.11	RALGAPA1	-0.304	ROCK1	-0.37096	ARHGEF40	0.169696	ZSCAN1	0.336383	KRTAP9-2	0.139615	SLC26A4	0.584863	CUL5	-0.250047	LINC00474	0.121954	KNG1	-0.502156	HNRNPD	1.81172	IFI27L2	0.569	NLN	-0.75107	WAC	0.148399	SEC16A	0.0965697	SPRED1	-0.123212	TPTE2	-0.598539	PDLIM5	0.218649	EIF4E	-0.124952	GPHN	0.0344141	PDP1	-0.876823	BEX2	0.373175
KCNIP1	-0.129	ME2	0.247	TFDP1	0.438469	FAM26E	0.180679	KLHL24	0.528614	KCNA7	0.111148	CNGB1	-0.202931	APOE	0.475554	LOC541472	0.116535	CD53	-0.852215	KLC3	-1.91414	C13orf34	-1.02	ZBTB20	-0.814432	DUSP28	-0.157478	SLC2A12	0.0860514	LOC284581	0.282572	COL9A1	0.459453	TLR7	-0.164629	LEXM	-0.132592	TSGA13	-0.0599345	NEUROD6	-1.10401	Xq22	0.373175
PPP6R2	-0.316	NT5C2	-0.211	NUCKS1	-0.675593	SLC5A12	-0.212616	IGF1R	0.514296	ATP1A3	-0.221039	ZBTB5	0.468237	TBXA2R	0.174935	ATP13A2	-0.0868752	IL12RB2	-0.520704	AGBL3	3.16908	POLE	1.24	SUGP2	-0.332576	STYX	-0.280819	IL1B	-0.295334	CCKBR	-0.103033	TRAT1	0.857653	FAM185A	-0.122621	FAM81B	-0.164209	XRCC2	-0.0474976	FZD3	-0.706399	BEX1	0.373175
FBXO25	0.126	E2F4	0.303	UBAP1	0.348834	LYVE1	-0.173861	LUM	-1.02115	DOLPP1	0.156469	FAM128B	0.473413	RAB11A	-0.175833	KIAA1958	0.0996844	ANK3	0.757123	MIS18BP1	3.54255	SCML1	-1.23	PTCH1	0.32937	BACH2	-0.377787	TSPAN7	-0.0902758	ZFP64	-0.0863	VAPA	-1.37399	TMEM156	-0.205256	LOC105379178	-0.148589	SLC22A18	0.034048	HS3ST4	-0.751361	AY833560	0.373175
ZMYM6	0.106	DPP10-AS3	-0.157	SMPDL3B	-0.167234	FGGY	0.166867	PNLIPRP1	0.745907	EZH1	0.382526	MTRR	0.65382	COX7A2	-0.196912	GLS2	-0.180712	NORAD	0.879219	LOC101927809	-2.47093	OR51B2	0.55	PAX1	0.344804	FBXO46	-0.254827	FKBP4	-0.200471	PRSS35	0.115787	C4orf46	-0.908483	IL17RD	0.147643	LRFN4	-0.117116	PCBP3	-0.0669275	MT2A	1.10865	BC126429	0.373175
USP8	-0.234	PRDM16	0.16	C10orf90	0.113202	USF2	0.259767	GYPA	-1.59053	PHKG2	0.336084	BAAT	0.413264	KLHDC2	-0.299044	PRRT2	-0.116728	MLLT11	-0.358094	PID1	1.91448	TBC1D4	-1.09	TTC19	-0.388455	JRKL	-0.268282	SHF	0.0885451	WIF1	0.40982	OR8H3	0.510017	EIF4A2	-0.248976	C3orf56	-0.107635	PRDM12	0.0239237	SPTSSB	-0.776829	OR5AR1	-0.461574
PKNOX2	0.0832	NBPF1	-0.23	ZIM3	-0.152869	SLC43A2	0.458067	DOK3	0.773769	COX6C	-0.152527	PPP1R9A	-0.591728	HNRNPA0	-0.287507	PPME1	-0.100528	ZBTB1	0.949529	TMEM158	1.10169	MLL2	0.744	ZNF83	-0.914857	CLIC1	0.137623	MOSPD2	0.138356	NR4A1	-0.210718	HTR4	-0.356243	KMT2D	0.0911747	RNF166	-0.173279	MICAL2	0.0404205	FBXL2	-0.645082	BC140745	-0.461574
PDLIM2	0.122	USP15	-0.22	HK1	0.191445	MVP	0.424326	FRA10AC1	0.594571	KRTCAP3	0.118739	C5orf54	1.07391	HMGCS1	-0.297612	ABCB8	-0.0872012	B3GNTL1	-0.791438	IL18	-3.26953	NDST2	0.701	RADIL	0.318039	BCL6	0.680046	FOSL2	-0.133835	FAM220A	-0.141696	PTPRO	-0.793071	GBP4	-0.270243	C20orf96	0.113398	STAC3	-0.0627921	GABRB2	-0.944764	OR1S1	-0.548852
SEC23A	-0.119	ZNF85	-0.19	COL28A1	0.175418	FH	0.197844	TCEB3	0.938732	C5orf4	-0.595803	ARHGAP26	0.66657	IMMT	-0.189707	PLPP5	-0.101544	GJA1	0.66132	TGM4	-1.83464	RFXAP	-0.949	TNFAIP8L2	0.259035	RFX7	-0.329194	VDR	0.167772	ELOVL6	-0.13944	ZNF793	-0.60997	PCDHB5	0.123652	MAPK15	-0.141171	DAPK1	-0.0554614	ANPEP	0.643667	OR1S2	-0.548852
COPS8	-0.168	NMT2	-0.481	SLC51B	0.118212	SLC22A17	0.234716	PKIA-AS1	1.37486	TP53	0.162013	EXTL2	0.682689	ZBTB7A	0.166892	EPC2	-0.216776	DOK1	-0.559607	LOC100506127	2.05341	ASPM	0.455	ECE2	0.294696	TOP1MT	-0.391404	C4orf17	-0.110641	CSF2RA	-0.109508	CATSPER2	-0.605125	DKFZP779L1853	0.151154	JAK3	-0.122327	WBSCR16	0.0178921	GFOD2	-0.59059	SASH1	0.323043
C21orf59	-0.158	PTPN22	-0.29	ACAD9	-0.32826	PLXNA4	-0.191725	DNAJC24	1.11236	CCNY	-0.257137	TMEM120A	-0.414649	NDUFAF4	-0.224389	SLC2A3	-0.170603	CD4	-0.974828	UQCC2	-1.01554	DAP	0.633	TSPAN13	-0.622025	PNPLA3	0.180739	RNASET2	-0.116473	PALLD	0.104298	SOX5	-0.495976	PALLD	0.153558	PCAT6	0.11367	INSL5	-0.0282074	MESP2	-0.814205	BX537611	0.323043
TSTA3	0.262	GRINA	0.468	RTF1	0.176681	KAT2B	-0.425625	SLC35D2	0.335243	SNRPN	0.168202	AHCY	1.01139	HMGCL	0.146959	MIR181B1	0.213971	CLPX	0.411391	TRPM3	-2.29459	SLC47A1	-0.683	CAMSAP1	-0.322886	ATP5SL	-0.165273	SLK	0.0683289	ANAPC7	-0.126496	GNAZ	-0.700719	ZFYVE19	-0.0869919	ATP2C2	-0.110361	PLA2G12A	0.0433744	C9orf129	-0.804793	ANP32C	0.511163
LOC100419583	0.242	AUTS2	-0.502	BCR	0.350384	ABCA1	0.29704	TACR1	-1.18496	FGD4	0.394464	DLST	0.523437	ARL4C	-0.357876	TAGAP	-0.113144	TP53BP1	-0.231061	LOC100130111	-3.20321	CDHR5	-0.507	TMEM221	0.32196	CTNNB1	-0.279443	RPS6KC1	0.0525369	HPSE	-0.0852652	SULT1A2	-0.469366	SLC7A10	0.15563	TFAP2B	-0.113344	ANKRD9	0.0267235	SAE1	-0.368541	ANP32A	0.511163
GPATCH11	-0.0992	INTU	-0.139	CNST	-0.305353	ATP5J	0.239972	ZNF584	0.64515	APPL1	0.320316	SKIV2L2	-0.716752	UBE2G1	-0.355625	WARS2	-0.111851	PECAM1	0.600205	WNK2	1.25251	KIF1A	0.621	PHYKPL	-0.713111	C12orf10	-0.273086	SH3PXD2A	0.111064	CX3CR1	-0.288218	LRRC39	0.500213	ANKDD1A	0.0972022	C12orf42	-0.137825	PTPN3	-0.0386361	RPS21	0.884211	15q23	0.511163
IQSEC3	-0.111	MXRA7	0.143	PYGO1	0.149335	PPP1R1C	-0.195423	SRPX	-0.999434	PAX5	0.126864	NARG2	0.504888	ENSA	-0.172897	C3AR1	-0.256996	HMOX1	0.711682	AKR1D1	-2.71868	PPDPF	0.763	BSDC1	-0.393643	PKIB	-0.331626	KLHL5	0.0797412	CCDC158	0.141895	FDXR	-0.761988	DIO2	0.313652	SLC8A2	0.136565	TERF2	0.051647	PDK3	-0.589599	BC007200	0.511163
TSFM	0.137	LST1	0.694	ALG13	0.247708	SMIM21	0.219828	GUCY1A3	-0.837319	GATC	-0.386739	SOX18	0.203304	ABHD4	0.150034	DSTN	-0.106534	SST	-0.709733	EFNA5	-1.37133	LRFN3	0.879	RPS27	-1.26268	ZNF709	-0.291853	JRK	0.137832	METTL5	-0.0896985	OR9G9	-0.498675	ERGIC3	-0.0876217	LOC285097	-0.148954	LOC136263	-0.0520294	PAQR9	-0.823982	CAT	0.378555
FAM150B	-0.128	DLK1	0.118	RIOK1	-0.270206	SLC25A41	-0.197046	ABI2	1.3483	COPS7A	-0.276162	TMPO	-0.799254	PCP4	-0.38922	AMPD2	-0.108184	SEPT5-GP1BB	0.698623	LINC00567	-2.6757	HADHB	1.09	MAOB	0.24644	CDKAL1	-0.363148	ADCY10P1	0.125744	ACP2	-0.0637173	FARSA-AS1	-0.586842	ICOS	-0.0965201	ANLN	-0.229023	IGSF21	0.0278419	NPIPL2	2.35209	catalase	0.378555
PARD3B	0.104	ZNF160	-0.413	CNPPD1	0.397363	SARS2	0.290402	SVIL	-0.667116	ACPP	0.10518	LOX	1.02572	FLJ11710	0.158605	MRPL9	-0.120912	RANGAP1	-0.291489	WDR19	1.73758	RBMS2	0.73	POU3F3	0.335878	MAP9	-0.414651	DUSP6	-0.121736	TM9SF2	-0.107129	HPN-AS1	0.60812	TRNT1	-0.157012	TMEM87A	-0.116154	SLC25A26	-0.0600958	YWHAB	-0.580795	11p13	0.378555
TRIAP1	-0.204	EMX2OS	0.176	CACNB1	0.174866	ST13P4	-0.363026	TRNT1	0.363894	CNDP1	-0.695041	SNORA84	0.374877	SNX10	-0.343736	CENPF	0.116473	RPL18	0.228954	CELF4	-3.43547	C3	0.821	SH3RF2	0.222348	RBM4	-0.270554	POLR3D	-0.0480736	MT1H	0.147746	PDE4DIP	-0.759331	ARHGEF2	-0.132743	C9orf84	-0.141102	CD2AP	0.0535606	FAXC	-0.675184	BC110398	0.378555
CHRM4	0.122	KRTAP19-3	0.145	OTC	-0.165976	RWDD3	-0.238018	CAV2	-0.711921	C9orf103	-0.602905	COL21A1	0.489719	POLR2B	-0.164762	MT4	0.115044	SYNGR1	-0.26023	NUDT3	1.13796	RAPGEF6	-0.972	CAMK2B	0.317728	OGFOD3	-0.34298	LOC100101478	0.0823239	JADE2	-0.117818	TPR	-0.601044	TEX15	0.157894	TCTN3	0.119239	PIGB	0.0390297	MIR485	-1.03155	ZBED3	0.274343
LIN7C	-0.234	MGAT5	-0.349	KAT2B	0.290817	TRMT44	0.263913	SOD3	0.832009	SF3B1	-0.321231	LAT2	-0.193535	PROSC	-0.158368	DKK3	-0.109415	SF3B1	0.444319	LELP1	-1.96848	CLCN7	0.691	CASP10	0.375224	LRBA	-0.404607	INE1	0.12295	GRK5	-0.196329	TEX11	-0.784019	EIF6	-0.113076	LOC101927537	0.0965467	BMPR2	0.0204326	MRTO4	-0.42998	BC007239	0.274343
CES1	0.146	WRNIP1	-0.331	ELF4	0.246862	PRR23D1	0.2168	RAB12	0.475906	NDUFB7	-0.407279	RALGAPB	1.02899	GRIN2C	0.279189	ERAL1	-0.125229	MICA	0.84219	POFUT1	2.06167	OTOF	0.812	P2RY1	0.26977	GSN	0.170139	ZNF461	0.06592	DIO2	0.20567	CLEC9A	-0.505152	PPP1R3C	0.271048	DUXAP10	0.225931	SLC35F2	0.0295041	FAM220A	-0.451623	ZNF768	0.292484
NCF4	0.259	NBPF10	-0.164	PDK4	0.597843	NOC2LP2	0.303702	PIK3R2	-0.261891	CD1E	0.164709	GAS7	-0.557174	CMAS	-0.405933	CCT7	-0.142702	SLITRK5	-0.335666	FLJ37035	0.765924	C17orf39	0.91	PANK2	-0.322902	PBLD	-0.33249	HAUS3	0.0784896	CISD2	-0.10921	GOLGA6L5P	0.485467	ZNRF3	0.168305	ARG2	0.224053	RPS6KB1	-0.0298009	ST8SIA1	-0.374603	BC013760	0.292484
GTF2H2C_2	-0.115	DNAJB14	-0.297	MAP4K4	-0.222667	NFE2L3	0.353309	ARNTL	-0.781295	PFN1	-0.238768	PTRH1	0.563652	S1PR4	0.199753	GSTK1	-0.129886	DHX29	0.400968	DSCR8	-1.39389	MRPS15	0.742	LMLN	-0.709646	DDX3Y	-0.158822	RALGAPA2	0.0949319	TRMT112	-0.0963927	ENTPD5	0.956709	DPPA4	-0.113819	FAT2	-0.0958659	CAPS	-0.0699566	linc-HAS2-2	0.882144	SPSB2	0.339797
SETD6	-0.169	CD164	-0.26	NRF1	-0.10719	HIST1H3F	0.557125	ATP1B4	-1.07684	NEUROD6	-0.410958	INTS2	0.860762	KCNJ3	-0.332802	PDE10A	-0.269514	CETP	0.730092	IGSF21	-2.46981	ST6GALNAC3	0.589	EEPD1	0.363981	GTF2F1	-0.207907	EFHC2	0.107514	C19orf12	-0.0627301	SLC7A1	0.427862	MIR148B	0.20859	TMEM174	-0.129489	SIAH1	0.0614275	SATB1	-0.478881	BC071933	0.339797
TRAF1	0.1	FAM149A	-0.144	SMC2	-0.187272	PAOX	0.270344	GATAD2A	0.4411	CSK	0.148984	CYYR1	0.457599	H2AFZ	-0.328588	ENTPD6	-0.0874042	PRR3	-0.340357	AFF2	-2.2433	MLKL	0.737	MESDC1	-0.532425	LOC100506990	-0.298486	COG8	-0.17932	HNMT	-0.110039	DAND5	-0.476888	APEX1	-0.10965	NFIB	0.116956	SND1	0.0389009	PPM1L	-0.516908	BTNL3	0.535761
DDX5	0.208	MKRN3	-0.156	SGK3	-0.647806	DENND5A	0.261321	RASSF4	0.737182	GLYR1	-0.475833	DST	-0.725337	ETV4	0.187012	PSMB7	-0.112246	DLG1	-0.367695	C5orf47	1.19705	DND1	-0.528	CNOT11	-0.290262	RNF14	-0.282501	TGFBI	-0.160748	PLA2G4A	-0.160254	HAO2	-0.802389	RCBTB2	-0.132401	SIGLEC16	0.110341	H19	-0.0575128	PNMAL2	-0.858282	AY358385	0.535761
FCF1	-0.144	PRUNE1	0.273	TMEM35B	0.210312	HIST1H2AG	0.385529	BRWD1	0.406263	IDH3A	-0.30941	PLEKHO1	-0.664358	TIMM10B	-0.169203	CFL1	-0.0826713	CYP4B1	-0.40639	LRRC15	1.87239	NANS	0.593	AKAP4	0.321096	BCAP31	-0.121559	USP47	0.0527633	KRTCAP2	-0.0813481	YME1L1	0.4333	ZNF516	0.121935	FAM175B	0.194446	SPATA18	-0.0421974	NDUFS8	-0.37319	FDPS	-0.340111
IL17RD	0.113	BATF2	0.191	FBLN5	0.30695	MRFAP1L1	-0.295243	COL6A2	-1.53181	TOMM20	-0.139798	VNN1	-0.173426	DKK3	-0.204485	AGPS	-0.0864971	PIK3CD	-0.431177	PHKA1	0.897513	ATP2B4	0.48	PTGDR	-1.07347	TTC28-AS1	-0.301135	ST13	0.0614239	JTB	-0.125834	LOC401554	-0.902248	ST6GAL1	-0.182532	OR7D2	-0.1441	C12orf31	0.0294118	RAC3	-0.559197	1q22	-0.340111
UBE3A	-0.184	DNAH12	-0.12	DCANP1	-0.168635	UBOX5	0.16836	FBXO16	0.282929	ZNF800	-0.520154	TM6SF1	0.776481	MAOA	0.289238	CSDE1	-0.0883792	MYL12A	0.306761	INS	2.13211	CDCA7	0.821	PTTG1	0.364747	C6orf62	-0.17153	UBA2	0.0527114	SDHB	-0.0930421	CDON	-0.594344	ADAM28	-0.326019	CPEB3	-0.120085	INHBA	-0.0512857	J01415.11	1.28872	AK125510	-0.340111
SUCNR1	0.159	MEOX1	0.118	PLTP	0.122965	ZNF700	-0.174205	M6PR	0.262368	NFYC	-0.549936	HSPA9	-0.778081	UQCRC2	-0.37934	DNMT1	-0.0915227	CAMK4	0.523828	PPP5D1	1.15633	CDK16	0.541	GOSR1	-0.430112	CEMP1	0.226831	ABCA6	0.106082	CSDE1	-0.0875144	VWA1	-0.482873	GJD2	-0.100466	SPACA6	0.162089	PLCL1	-0.0281217	SFXN3	-0.338727	C1orf104	-0.340111
FAM27C	-0.0962	KANSL1	-0.404	SLC25A41	0.144439	ZNF736	-0.201584	LAMA4	-0.712353	PSMA5	-0.420512	HNF4A	0.462884	SULF1	-0.255948	DTX3	-0.102426	ZNF282	-0.407791	ZSCAN10	-1.62298	RTTN	-0.679	CEMP1	0.502233	LRRC47	-0.157053	MRPL9	-0.0441204	MRPL48	-0.116102	CCDC184	-0.698175	TRPM8	0.0885079	ZC4H2	0.136562	SNAPC1	0.0396862	GABRA1	-1.02867	PAQR7	-0.330224
DEPDC5	0.0992	WARS	0.674	AVL9	0.149571	SPATA31A7	-0.176046	TIMD4	-0.621301	FAM107B	-0.650374	G3BP2	-0.326321	UBE2N	-0.322766	UBTF	-0.127777	RAP1B	0.395675	SERHL2	-1.93112	TMEFF1	1.26	LINC00290	0.288558	SLC12A2	-0.340588	SF3B2	0.0560361	PLK3	-0.0939192	IL2RG	-0.540822	SNORD4A	0.145675	PEX6	-0.179259	ETHE1	0.126233	MADD	-0.461993	BC034015	-0.330224
BNIP3L	0.372	LAMP2	0.231	ERGIC1	-0.289699	LOC401554	0.27865	RSPH3	0.381147	MMP1	0.105852	ZNF346	0.45012	ADSS	-0.270344	STRA8	0.115322	FOXD1	0.620197	SYT3	-1.44954	FBN2	1.28	ANPEP	0.744796	SIVA1	-0.184463	PLEKHG1	0.0977787	MCRS1	-0.089562	CPNE5	0.51994	RNF182	0.271635	IRS4	-0.156794	CSDA	0.0840091	PPP2R5B	-0.437808	RPL9	0.301145
LOC100505920	-0.136	BTF3L4	0.201	HAGH	0.326909	LCE3C	-0.197602	TBXAS1	0.632809	UBR3	0.269609	NUCB2	-0.909829	KCNS3	-0.193121	ARHGEF25	-0.131136	PLAGL2	0.278558	IMPG2	2.49073	PPP1CB	0.83	ZFAND6	-1.1015	TMEM70	-0.178686	TMEM168	0.076269	SLC13A5	0.115698	OR51F1	-0.380132	SLC1A3	0.376449	SLC30A5	0.108381	SMAD4	0.0291927	LOXL1-AS1	-0.601854	4p13	0.301145
LSM5	-0.268	SH2D1B	-0.578	FAM162A	-0.310079	BMX	-0.168057	LOC284950	-1.14227	BTRC	-0.533183	ORC3L	-0.685908	SSX2IP	-0.402764	LINC01567	-0.139418	COL19A1	0.663143	KCNAB1	2.15775	UMODL1	0.678	GLS	-0.417001	TMEM204	-0.401722	TRIM33	0.039613	SEH1L	-0.115454	PRPF39	-0.73559	DUSP12	-0.114107	TPRN	-0.103226	FXR1	0.0254681	EPHA5	-0.711395	AY376242	0.301145
SMARCA2	-0.234	BAZ1A	-0.196	MGAT5	-0.348082	CORO6	0.173959	UGT2B15	0.976336	GHITM	0.268646	EFNA2	-0.193791	FAH	0.1967	TRIP4	-0.117798	IFNB1	1.04153	TMEM165	1.98654	FURIN	0.64	BBIP1	-1.11762	APMAP	0.275911	BTBD8	0.107413	IGSF10	-0.0843882	LCE2A	-0.66857	WDR83OS	-0.084031	LYRM5	0.176819	SMAD9	-0.0415003	SLC16A7	-0.521867	DDX53	0.3521
MIR1251	-0.0934	KIAA1210	-0.164	DENND6A	-0.129357	XRCC5	0.197997	C11orf54	0.236171	EOMES	0.112936	ABCD4	0.817415	RSRC2	-0.206361	ABCC5	-0.106329	GRM8	-0.823228	RGS6	1.31321	FYTTD1	0.506	PDK2	0.495404	UBE3B	-0.216091	BCOR	0.0750779	GPAT3	-0.264366	PEG3-AS1	0.551623	CD84	-0.161718	LRP5	0.113923	LOC388152	0.0255733	KRT31	-1.33189	BC051703	0.3521
C1QTNF2	-0.103	COTL1	0.423	LIN7C	-0.273521	CMTM4	0.201726	AXL	0.842908	OR9Q2	0.129591	TXNRD3IT1	-0.230745	ING2	-0.188282	ATG5	-0.104476	C1orf68	-0.586482	CPS1	-0.777604	AMZ2	0.938	LDLRAD4	0.416211	TMED2	-0.136914	HCLS1	-0.124297	KLF3-AS1	-0.155074	KRT37	0.510702	COLEC10	-0.106365	CALCR	-0.204752	PHYHD1	-0.0432525	linc-IMPG1-1	0.870566	VPS37C	-0.592157
HK1	0.261	DCD	0.19	UGGT1	-0.24094	METTL21A	0.306243	PARK2	0.753385	WNT5A	0.743642	ATP6V0A1	-0.60882	S100A13	0.3182	DUT	-0.0891935	PIGQ	-0.319166	MAN1A2	-2.47504	EIF4G2	0.546	HECTD4	-0.478194	ACTR3B	-0.221299	NUBP1	-0.128918	TMEM106A	-0.158726	CMTM5	-0.684303	ATP1A2	0.254168	GAB1	-0.125233	ESR1	0.0304136	CHSY3	-0.777353	AL834261	-0.592157
PSD3	-0.111	CCDC144CP	-0.13	OR2K2	0.121005	MRPS34	0.256902	NODAL	0.951272	C1orf31	-0.445188	OSR2	-0.172093	RLBP1	0.192059	UBASH3B	-0.142191	ACACB	0.637187	CASP8AP2	-1.29962	F13A1	0.848	GGNBP2	-1.05825	AP5M1	-0.184478	TGFBR2	-0.0933663	NDUFA11	-0.0759541	CRYBB2	-1.71324	MRPS12	-0.127872	RORA	0.283335	IFNA21	-0.0324545	KLHL22	-0.316561	IL4R	0.333636
HNRNPA1L2	-0.12	FECH	-0.236	CNGA4	0.142442	AGPAT1	-0.179441	ERAP2	1.06724	KCNN1	0.203397	ENPP4	0.725508	BCL7C	0.17207	CAPN1	-0.110513	REL	-0.551502	C11orf63	-2.35777	BRCA1	0.695	CHD1L	-0.467495	NCK1	-0.269697	SMG6	0.117877	MRPL49	-0.0805757	LINC01538	0.72723	STARD7	-0.081345	SRSF12	0.167227	CIRH1A	0.0312635	CDK2	0.656451	AK303255	0.333636
B4GALT1	-0.242	FAM26F	0.591	OSCP1	0.122447	FBLL1	-0.203537	TMEM187	-0.50987	ACRBP	0.135845	FRYL	-0.831068	TNFRSF25	0.235544	NTN1	0.0833566	RYK	0.37459	NLRC4	2.99092	FAM20A	-0.731	NNT	-0.520004	SLC25A25-AS1	-0.198126	ZC3H7A	0.0590084	TMEM65	-0.111535	PRTN3	0.764971	CH25H	-0.213602	PPP2R3C	-0.149525	LOC120379	0.0252952	GABRA5	-1.0536	SRP14	0.329527
ETFA	0.185	MIR542	0.136	RFESD	0.261165	UBXN4	-0.244331	LOC101927447	-0.833223	HIF3A	0.113356	OPRK1	0.618673	TM4SF20	0.131334	BEX3	-0.112043	GRM2	-0.251728	STAB2	1.3614	SLC18A2	0.858	N6AMT1	0.375893	THAP9	-0.316835	ZKSCAN2	0.0801066	CD37	-0.0946672	WDR90	-0.589762	RPL41	-0.158911	CAND1	0.139738	NUP93	-0.0584797	P2RY2	0.809247	15q22	0.329527
NOXO1	-0.1	CYP51A1	-0.377	MAG	0.151745	PRCC	0.216759	SETD9	-0.755517	SNAP29	0.494856	SSU72	-0.305124	OPLAH	0.216938	USP4	-0.0827136	AMFR	-0.488809	AFM	1.96923	CHRNB1	0.743	CACNA1G	0.304062	DDX10	-0.220348	RSF1	0.0544388	SLC22A17	-0.102162	PDE4B	1.14652	SLC25A23	0.133466	ALG13	-0.168406	MLPH	0.0323439	LNP1	-0.360464	AB061546	0.329527
ACADVL	0.28	URM1	0.425	YOD1	0.728351	NXPE1	0.282327	HSD3B7	-0.388237	IL17RD	0.478934	GTF2IRD1	0.687028	RAD51C	-0.341847	PPP1R7	-0.101115	EIF1AY	1.04524	STK38	1.03486	ITPR1	-0.599	LINC00674	-0.470575	TMEM134	-0.188351	EMC4	-0.0618607	BCS1L	-0.131442	MEGF8	-0.780876	ACSBG1	0.269071	LOC100508631	0.112126	CPNE9	0.0951313	CLCN4	-0.408416	RWDD2A	0.349587
C5orf22	0.114	PINK1	0.251	OSTN	0.127225	BCL2L13	0.305028	GNG2	1.31513	C17orf53	0.118459	GNAI1	0.52726	PDCD10	-0.263004	CASD1	-0.170596	RFC4	0.738863	ADAM18	-2.51386	DCLRE1B	1.43	SRSF1	-0.381579	DHX35	-0.231488	PDIA3	-0.0797045	TRAPPC5	-0.0665497	BCAM	-0.551063	C6orf163	0.135798	VIL1	-0.168544	EFNB2	0.0241288	ENTPD6	-0.501537	AK295724	0.349587
TMF1	-0.126	GIMD1	0.135	GNL3L	-0.308887	AGO1	0.242914	LOC101928995	-0.937169	ZNF624	0.321853	CSGALNACT1	-1.3977	FGFR3	0.427277	CTSB	-0.0971201	FGG	1.2301	LSAMP-AS1	0.808012	RNF31	0.599	RNF34	-0.716555	USP6NL	-0.238681	MRPS28	-0.0500256	C1QB	-0.149084	SNORD114-2	-0.463142	MYBPHL	0.114994	NRF1	-0.152057	RAG2	-0.0351168	PCDHA11	-0.46013	AF274944	-0.415806
FAM102A	-0.125	CPNE6	0.12	CASC4	-0.224321	FAM65B	0.268392	CFAP43	1.4609	HTATSF1	-0.211089	SLC22A18	0.642938	ISCU	-0.226411	TBC1D9	-0.11272	CD59	0.25852	MRPL55	-1.88636	CYB5R1	0.616	RTN4	-1.02428	CTNS	-0.213824	SLC2A4RG	0.0962278	GJB6	0.303992	C2CD4B	-0.626546	SAMD8	0.0751579	LOC102724587	0.128702	TDRD9	-0.0450584	ARPC1A	-0.334634	LOC100128185	-0.415806
TPPP3	-0.123	CD48	0.168	SNORA24	0.185622	MPRIP	-0.230283	CIZ1	0.375035	SULT1E1	0.0786205	MYEOV2	0.465853	PEX11B	-0.295065	SPRY4	-0.262354	BDNF	-0.92431	LOC101929084	-2.80366	C5orf62	0.881	CSF1	0.375714	TMEM132A	0.195461	ZNF75D	0.0622973	CH25H	-0.142186	ZNF205	0.817253	FGF2	0.215229	LOC730101	0.154166	PLD5	-0.0314509	SPATA2L	-0.809834	PNAS-19	-0.415806
ZNF212	-0.302	UPF3A	-0.283	NBPF9	-0.597714	TNFRSF4	-0.395108	TMCO3	-0.298157	HIST1H2BK	0.118249	NUP155	1.0089	SMARCA2	-0.250557	MIRLET7D	0.128218	DMWD	-0.205989	TBXAS1	-1.12561	PCDHB13	0.892	ZMYM2	-1.11116	MRM3	-0.186162	MED17	0.065574	FOXO1	0.0928869	CCDC70	-0.448545	ATXN7L1	0.112385	SMAD2	0.12317	HSPA2	0.0355895	KLHDC5	-0.302304	CSNK2B	-0.264577
RIOK1	-0.203	VHL	-0.334	PRCP	-0.441928	SCGB1C1	0.343528	MEOX2	-2.21698	CTNNBIP1	0.271729	DNAJC6	-0.41979	AHNAK	0.144234	B4GALNT3	0.111618	AKR7A3	0.983032	PRR22	1.32854	LPAL2	-1.27	TREML1	-1.01228	MTUS2	0.153108	HEATR1	0.0494652	OR13C3	0.089785	SHKBP1	0.618906	FAM220A	-0.143985	MS4A12	0.157696	BRD8	0.0257179	NRG1-IT3	-0.706668	LY6G5B	-0.264577
SLC41A2	-0.132	BTNL8	0.126	TAOK1	-0.314492	CENPM	0.204201	SLC6A20	-0.79393	CCDC57	0.14049	WDR55	-1.28983	SNX2	-0.418949	PPP2R1A	-0.112439	TCF25	-0.576712	PI3	0.89058	LYZL4	0.659	DHX36	-0.410773	SKA2	-0.26271	KMT2C	0.103611	PGGT1B	-0.203107	ACER1	-0.496816	C2CD2	0.113258	SPATA19	0.123781	PDE6A	-0.0459443	RP11-758N13.1	-1.25255	BC112017	-0.264577
IER5L	0.127	SETD6	-0.216	GOLIM4	-0.195289	ZNF23	-0.421238	CRYBB2	1.03436	ZNF169	0.118447	C2orf63	0.850503	DOCK4	-0.277884	ACO2	-0.106129	DGKE	1.20483	SCN8A	1.41649	AMFR	0.455	SFT2D3	0.473684	USP36	-0.257292	HCST	-0.127543	GAD2	-0.239205	OPALIN	0.553631	BUB1	0.102066	FAM135A	-0.146844	CYP7A1	-0.0385943	ELAVL4	-0.858266	BC112019	-0.264577
C14orf169	-0.19	TMPRSS11B	0.135	MT1X	0.328135	HPSE	-0.226501	HSD17B14	0.607738	NACA	-0.329662	RRM2B	0.986731	SOCS5	-0.361786	SUGP1	-0.0724017	UBA1	-0.273644	TRIM40	-2.00595	STX1A	0.547	44628	0.764213	COG7	-0.234374	STAB1	-0.177719	ACTR3	-0.105649	ADH1A	-3.81394	COL25A1	-0.0878584	SDCCAG8	0.133445	PTGFR	0.0195683	RP11-206L10.8	0.669216	AY113186	-0.264577
GPN2	-0.27	ANO3	-0.113	SPRTN	-0.123379	SNORA67	-0.331562	TUSC1	-0.7262	CRTC1	0.176945	GPR37L1	-1.26406	CRHBP	-0.305704	FZD4	0.119692	CD22	-0.936161	HES2	-2.19415	PDE5A	1.06	BDKRB1	0.257108	PTRHD1	-0.169171	MSL3	0.100778	VMA21	-0.0759509	RAB9BP1	0.453313	DUT	-0.0729376	KLK15	-0.113366	RUNX2	-0.0669384	USP22	-0.423286	CR541699	-0.264577
CBLB	-0.329	OR13A1	0.103	GSPT1	0.503075	AIF1	0.609942	PTPN20	2.0643	ECSCR	0.139968	NOD2	0.307433	SLC1A1	-0.345279	ASH2L	-0.102206	PRKDC	-0.334115	FAM84A	1.95965	ACTC1	1.18	MEIOC	0.313384	GPATCH2	-0.243731	AMMECR1	0.0767185	HLA-DMA	-0.156212	SEPT4	-0.706603	CCL3	-0.129462	KLK2	0.115099	MEP1B	-0.0697736	DAZAP2	0.482722	AK300671	-0.264577
AHCTF1	-0.235	HRC	-0.0982	CDAN1	-0.197905	TFE3	0.192754	TTTY13	0.80953	LRRTM2	0.375541	UBXN6	0.64346	MT1X	0.469549	OR1A2	0.162089	EIF2AK2	-0.33315	ASAP2	-2.37336	ARMC9	0.845	CRISPLD2	0.691102	TMTC3	-0.313181	SLC10A7	0.160674	MAP1LC3A	-0.0850534	WDR47	-0.413421	ADHFE1	0.208647	PRPF40A	-0.132429	ZNF556	-0.0544803	SCG2	-0.711784	CR592250	-0.264577
ANKK1	0.105	UTP23	-0.246	LOC729970	-0.134644	LIPT1	-0.233996	FAM127B	0.326547	C5AR1	0.0879023	CANX	-0.795093	SEC61A1	0.15705	INGX	0.098509	CCKBR	-0.343826	LOC100506122	-2.31674	PRDM2	-0.902	PIGK	-0.489862	GEMIN5	-0.239845	TTLL5	0.0795597	RABEP1	-0.0590597	FAM84A	0.375645	CSPG4P5	0.135599	MTA2	-0.171074	SRCAP	-0.0513784	IPCEF1	-0.820176	AK308742	-0.264577
SSR4	0.215	IDO1	0.176	TRIM59	-0.133428	ITGB2	0.28838	ITGB4	0.429554	SVOP	-0.300595	MKKS	0.87571	ARL6IP5	-0.422846	PPP1R3F	-0.0887004	CDC6	0.826692	SERPINB12	-3.09044	DDI2	-1.26	IGSF3	0.284907	BTF3L4	-0.158279	STK38	0.0696556	CYB561A3	-0.11754	HSD3B1	-0.447459	BMP7	0.173978	ARHGEF2	-0.122101	TSTA3	-0.0796369	SEZ6	-0.719961	LILRA1	-0.286369
RERE	-0.139	UCA1	-0.142	RPS26P11	-0.155197	AICDA	-0.194631	REEP3	0.389066	RPRD1B	0.126366	CCDC88A	0.651147	NUDT21	-0.280707	LOC100133106	0.134216	NR1D2	0.489551	CHRM4	1.8894	COL5A2	0.686	INPP5B	-0.493482	CYB5A	-0.298952	LPAR6	-0.114336	CC2D2B	0.137622	ADCYAP1R1	0.367224	PLD5	-0.137107	CNTNAP2	-0.158641	ACAD8	0.0220513	FRMPD4	-0.947169	AK292028	-0.286369
KRTAP13-2	0.123	WDR90	-0.141	GADD45A	0.323969	WNT10A	-0.186504	SLPI	-0.280727	GPHB5	0.124023	LUM	0.187017	SLC38A2	-0.358266	RRP9	0.100494	KCNK3	-0.477266	HYI-AS1	1.9895	CTNNAL1	1.94	ZNF621	-0.735582	NMRAL1	-0.25842	UQCRFS1	-0.0702083	TM9SF3	-0.0873323	CALY	-0.545677	LHX2	0.210103	SH3RF3-AS1	0.156405	REPIN1	-0.0274932	SCAMP1	-0.472142	LILRB1	-0.286369
PPP1R18	0.299	BMX	-0.135	ZFP69	-0.160634	FAM227B	-0.269776	DCAF12L2	-0.60183	ISCA2	-0.490934	ZSCAN18	-0.25938	GCLM	-0.235545	RNF112	-0.165563	LMNA	0.572696	RYR2	1.29296	YWHAE	1.21	ASPDH	0.346173	PGLS	-0.231459	TSC22D2	-0.079625	POLR3B	-0.131938	TTTY21	0.390164	DDX23	-0.0792338	ITPR3	0.146116	ALKBH4	0.027304	TCEA1P2	0.610468	BC063009	-0.286369
LARGE1	0.164	GRIA4	0.124	CELA3A	0.173587	ZAN	-0.155652	BFSP2	0.802463	ORAI2	0.498118	MALT1	0.561213	IL18BP	0.16411	NGRN	-0.0978658	GPR162	-0.28905	BNC1	-2.30309	SYTL4	0.814	ZXDB	0.319077	TCTE3	-0.217891	EPB41L4A	0.0635325	PRMT1	-0.106542	SNORA71A	-0.503099	CLDN10	0.300082	WWP1	0.119926	RTN4IP1	-0.0358344	SEMA3E	-0.973062	FADD	0.257793
SLC31A2	0.401	ERO1B	-0.144	BCL2L1	0.467616	HEATR3	-0.171986	ZZEF1	0.641479	CGNL1	0.150403	OAZ1	-0.215623	MT1F	0.380485	CTSC	-0.163011	WNT10B	-0.332788	PRX	1.84626	CSNK2B	0.423	ADNP2	-0.420804	MYBBP1A	-0.153822	ITGB2	-0.263735	ARG2	-0.256716	CD86	-0.640638	CNIH4	-0.133719	LOC100507654	-0.128657	C19orf37	0.031508	ATP8A2	-0.67697	U24231	0.257793
ZNF277	0.224	ZNF585B	-0.141	PCDHA3	-0.126152	ACSS2	0.171043	ANKRD16	-0.261042	RBM24	0.177067	SFRS11	0.56778	TAF7	-0.265107	CSF1R	-0.173849	SZRD1	0.295199	RNF145	2.45651	KLC2	-0.504	PRKCH	0.357674	CCDC137	-0.196493	NBPF14	0.0893157	ARMCX2	-0.107488	CXCL17	0.516372	CPSF7	0.0691546	FITM1	0.114988	ANXA7	0.034068	SOSTDC1	-0.930203	FLJ36031	0.261964
ME2	0.195	RHOG	0.489	COX6C	-0.218615	DAB2	0.508673	LOC284933	0.869551	PTMS	-0.271338	TBC1D1	0.540305	OSGIN1	0.257752	HDLBP	-0.082429	CLTB	-0.342461	FEZF2	1.53511	LRP1	0.897	CNPY2	-0.415633	LAGE3	-0.224138	PTPN6	-0.150196	ATP5B	-0.114981	PHKG2	0.566652	DUSP4	-0.137879	KRTAP9-9	-0.1449	ZNF77	-0.0450688	ORAI2	-0.678163	UROD	0.312567
ANXA10	0.112	SLMAP	-0.25	COL6A1	0.128382	HYPK	-0.427757	LOC286154	0.630185	BTN2A3	0.119295	PIGT	0.499873	CCND2	-0.244519	SKAP2	-0.25073	HLA-DMA	-0.713159	RARB	2.06196	BAIAP3	0.979	GIPC3	0.34244	RNF157-AS1	-0.251922	UPF3B	0.0859335	TMEM18	-0.108496	BACE1	-0.938731	GPAM	0.264069	ZFPM1	0.150724	PKIG	0.038742	ALDH1A2	-0.580425	1p34	0.312567
FLT4	0.108	ATG3	0.33	SGCD	-0.130072	TCF23	0.184272	CABP5	-0.841711	MUC4	0.149696	TRPC3	0.93027	MAFB	-0.406455	UQCC3	-0.107632	IAPP	-0.989926	CPA3	2.87821	NFIA	1.25	SIRPA	0.452082	ASIC4	0.168697	TBC1D24	0.0638922	TMTC4	-0.167579	ALPPL2	-0.862696	RGS12	-0.0877582	MRPL57	0.106537	SLC12A3	-0.0440873	RTN1	-0.762271	BX647308	0.312567
CELA3A	-0.0784	SLC25A3	0.251	ONECUT2	-0.144824	ZNF674-AS1	0.173538	TSTD2	0.54988	SHMT1	0.112704	TNFAIP3	0.346625	SMG6	0.194791	RAB2B	-0.146961	CHL1	-0.414483	RAD21L1	1.1322	C12orf49	0.441	SLC18B1	-0.44264	CMPK1	-0.221243	PRAP1	-0.175946	DISP3	0.0846032	RORA	0.75764	ZNF576	-0.0741322	CENPN	-0.25817	S100A8	0.0696858	FAR2	-0.474897	CCNA1	-0.343989
OR1B1	-0.0921	MAG	0.147	ISPD	0.130459	NBPF1	0.226021	GIPR	0.399089	LYPLA1	0.377604	CAND2	-0.732893	KIF1BP	-0.284147	NOL12	-0.0880658	CEACAM5	-0.803782	MS4A6A	-1.22104	NR2C1	-0.991	FLVCR1	-0.574393	SUMF2	-0.282317	LMAN1	0.122723	SLC5A6	-0.116268	OPHN1	-0.490013	SNORD74	-0.110634	LOC100128281	-0.126237	SLC13A5	0.0322765	HMOX2	-0.405612	BC036346	-0.343989
TAOK1	-0.236	SUCLG1	0.157	TAZ	0.182006	PEX11B	-0.253911	TERF2	1.05027	UPK1A	0.12088	FGFR1OP2	0.343447	BCAT2	0.166657	ZDHHC5	-0.0897435	PAM	-0.28165	LOC100422526	-2.00462	C22orf9	-0.572	H2AFX	0.367663	NRBP1	0.299644	VIP	-0.167614	EIF6	-0.0770808	FAM27C	-0.592739	BOP1	-0.0873654	SULT1B1	0.174835	PDE1B	0.0553415	UHRF1	0.93715	KHDRBS2	0.264681
MFSD14B	-0.218	SAMD4A	0.232	BCLAF1	-0.238468	ATXN3L	-0.20939	TGFBI	-1.73734	SCNN1D	0.152601	RBMS2	0.534987	DUSP3	-0.421691	FOXN3	-0.0917989	PRPF4	0.215327	EPN2-AS1	2.35415	PF4V1	0.781	ADAM23	0.346183	CYBA	0.285085	MYCBPAP	0.138604	MRPS7	-0.0900675	PRX	-0.527461	TKTL2	0.106426	PRORY	0.13844	LTB4R2	-0.0374241	S1PR3	0.413332	AK292043	0.264681
FAM162A	-0.245	ZSCAN4	0.112	CBX1	0.268375	MPLKIP	0.224574	ITSN1	-0.38558	GANAB	-0.367052	C1orf175	-0.228075	ELK1	0.178484	FOCAD	-0.0999788	GSTZ1	0.510867	EEPD1	-0.904781	SOLH	0.636	ARL14	0.233962	GAPVD1	-0.12259	OSER1	-0.0545047	PRMT8	-0.153601	NWD2	-0.594175	TGFBI	-0.116651	TONSL	-0.114829	PPP1R10	0.044995	RP11-379F4.1	-0.728223	AK127082	-0.345202
NFATC2IP	-0.22	BAD	0.134	LOC102724804	-0.145776	CNPPD1	-0.369346	TRAC	0.960769	CLDN1	0.281987	TFPI	0.528714	NPRL3	0.16515	MECR	-0.0896445	KCNF1	-0.369828	CBR3-AS1	-0.802748	CDK15	0.685	SPDYE2	-0.912384	TSPOAP1-AS1	-0.28936	SLC35D1	0.0921876	MYBPHL	0.0773528	SNORA51	0.455602	LIPJ	-0.0938756	ZNF747	-0.151208	MTRF1	0.0309372	TSHZ2	-0.581864	FLJ45139	-0.345202
ATP5G2	0.135	CEP78	-0.389	RAB2B	0.343641	TRIM29	-0.150461	FNBP4	0.646627	GJA1	0.769763	CTNNB1	0.697936	HMGXB3	0.122942	OR7E13P	0.194925	PCGF1	-0.451595	CRB1	2.29316	ZDHHC17	-0.774	FNBP4	-1.00017	CADM4	0.226188	MDC1	0.0668981	CFL1	-0.0556992	CSDE1	0.462366	MYH15	0.109388	ZNF678	0.0844703	B3GALT1	-0.0384705	SLC8A1	-0.529917	SH3BP5	0.27215
ASGR2	0.368	SYNJ2BP	-0.46	DEFB131	-0.14357	SORL1	-0.322329	DEPDC5	-0.89126	PTPLAD1	-0.165351	SH2D2A	-0.192785	GAP43	-0.320419	STX8	-0.135138	TNKS	0.79363	ITGAX	-2.05722	SLC35D2	0.442	CFH	0.637773	SUPV3L1	-0.262989	SLC30A4	0.0544801	FAM151B	-0.103626	MTF2	-0.672805	ARHGDIB	-0.223857	NHLH2	-0.150381	ALK	0.0243754	ACTG1	-0.362128	AB005047	0.27215
CHRNG	-0.0823	ADGRE5	0.39	UIMC1	-0.563647	KAZN	0.1841	LOC102724487	0.628148	RBM47	0.103536	TRPM8	-0.205414	PALLD	0.189006	PDRG1	0.101254	POU2F2	-0.407004	LOC102724611	0.918143	LY75	0.577	ASAP2	-1.3236	MRPL11	-0.229873	TIMM10B	-0.0772842	IPO5	-0.0799034	AKAP14	0.476524	PEPD	-0.133467	SCIN	-0.146349	PTK6	-0.0302853	LPCAT1	-0.42884	SEPX1	0.25501
SIRT5	-0.141	RNF144B	0.374	ZMYM3	0.166746	DACH1	0.216032	TNK2	0.960815	CDK10	0.212474	FRY	0.645739	NPEPPS	-0.273299	SRD5A3	-0.14558	MLH1	-0.246875	ZNF451	-2.41964	GEMIN6	0.961	LOC101927122	0.248365	SYNCRIP	-0.265452	DENND2C	0.079754	PIGK	-0.128987	IL34	-0.551788	TNRC6C	0.083972	YES1	-0.128456	ATAD3A	0.0429825	LINC00598	0.711394	AF187272	0.25501
RABGGTA	0.131	PTGES2	0.248	GRIN2A	0.116323	LMX1B	-0.161358	EIF2B5	-0.35555	BFSP1	-0.630469	MMP8	0.185179	SQLE	-0.285779	DUSP3	-0.152799	RUSC1	-0.294418	LOC105372179	-1.89645	RAB33A	0.941	SYNDIG1	0.39268	SEPT7	-0.243356	CEP70	0.064238	EIF3I	-0.0657662	ZNF623	0.837531	CYSLTR1	-0.147143	LOC101927516	-0.126159	PIG38	-0.0225351	MAP2K1	-0.637986	ZNF426	0.240539
ACTR6	-0.225	LINC01547	0.122	YBX3	0.552535	KCNK4	0.159753	C5orf66-AS1	-0.48436	GATA2	0.129121	HPS1	-0.21731	SMOX	0.195288	CLOCK	-0.131439	SMARCD1	-0.336903	RHO	1.53672	UBA7	0.502	NUMA1	-0.848974	ZBTB10	-0.319825	ZNF419	0.0669749	FGD2	-0.0943062	RNVU1-7	0.640253	PLCD4	0.137199	GABRB1	-0.140006	KRT6IRS	-0.0211573	RP11-186B7.4	0.491563	BC001791	0.240539
FAM19A3	-0.0857	LINC00841	0.152	MTMR11	-0.366649	LPCAT2	0.290849	HSD3B1	-0.464429	FAM76A	-0.668532	MGST1	-1.28615	C2orf47	-0.223429	KCNJ9	-0.0948127	ISL1	-0.6993	LOC654780	1.19476	FOXO3	1.08	CYLD	-0.587906	SLC11A2	-0.266722	PPIL1	-0.0628931	HCCS	-0.165337	FRG2DP	-0.439485	ALDH6A1	0.192388	GCNT7	0.136878	GUCA1C	-0.042072	TAGLN3	-0.894156	IER2	0.302394
LYPLAL1	0.262	PPIG	-0.354	METTL2B	-0.140055	TSPY26P	-0.204047	LINC00475	0.346022	RAVER1	0.154908	DNMT3B	-0.191091	C21orf2	0.152661	GALNT9	-0.156245	ZFYVE26	0.366762	FOXO4	1.12855	RAB23	2.03	INO80D	-0.911492	GSPT1	-0.206309	NHP2	-0.0597101	MUS81	-0.0853859	KRTAP10-2	0.649374	HLA-DPB1	-0.229726	ALG12	-0.0865987	PROSC	-0.0388864	PSRC1	0.662389	BC072432	0.302394
MUC21	-0.0872	PIN4P1	-0.179	RGCC	0.458298	MID2	-0.203771	APOC3	-0.566383	FAM58A	-0.374987	JMJD4	0.379008	PDGFRB	0.219849	NRIP2	-0.217768	CRHR2	-0.615986	FCRL2	-1.73092	MCM2	0.91	IDS	-0.753802	METTL9	0.15731	TMEM123	0.0939938	SLC32A1	-0.129414	LRRC30	0.872851	LAPTM5	-0.345889	NUP54	-0.144604	PPP6C	-0.0638569	CRTAC1	-0.504777	OR52K2	-0.395387
SNORD62B	0.163	ZNF831	-0.332	FECH	0.649151	HNRNPDL	-0.294068	CHSY3	-0.883893	FAM170A	0.131343	CCND1	0.613199	ADIRF	0.362287	MIR101-2	0.121628	DIAPH2	-0.764284	PLIN5	-1.93995	FXYD6	0.61	THUMPD1	-0.502309	MAP6D1	-0.23167	CTSC	-0.13833	CTSL	-0.112108	DBNDD1	-0.616587	CLU	0.0879375	FTCD	-0.132722	TMPRSS11B	-0.0406223	ARF5	-0.469541	BC137247	-0.395387
ACACA	-0.261	PIN4	-0.163	L1CAM	-0.144609	NENF	0.205585	SYTL3	1.02553	ATCAY	-0.434084	EFHB	0.388715	UTP18	-0.273605	RPS6KA4	-0.102078	MUC3A	-0.313103	ZNF711	-0.813041	TCP10	0.904	44810	-0.54291	IRGQ	0.164233	NOTCH4	-0.0633517	DPP3	-0.0779573	ELFN2	0.846343	ABHD2	0.115564	DNAJC12	0.309692	TSC22D2	0.0295592	linc-CLN5-1	-1.40169	CDC26	0.433815
RAPSN	0.12	TNNC2	0.255	KRTAP10-11	0.162188	BIRC2	-0.35683	SERPINA1	0.703575	ARPP21	-0.380057	ATPIF1	0.304325	ITIH4	0.156989	RTN1	-0.0697333	SLC30A3	-0.330893	TPH1	0.921833	DYNLRB1	0.533	PRRC2C	-0.516957	ERAL1	-0.276707	LRRN4	0.123725	FAM167A	0.0932301	TMEM88B	-0.51116	TM9SF1	-0.0765948	HSD11B1	0.119064	AGRP	-0.0460385	CLEC4E	1.28554	PRPF4	0.433815
SEC14L1	0.175	PRAMEF1	-0.13	GLUL	0.323809	TFDP2	-0.315229	FMO5	0.413521	CAPNS1	-0.25839	DKK2	0.413791	MASP2	0.150342	IGFBP5	-0.340293	TOP3A	-0.580837	MAFB	1.80692	MGLL	0.82	SPINK7	0.296407	ITCH	-0.207535	SAFB	0.0805262	TRIP10	0.104904	MYCNOS	-0.388541	HSP90AB4P	-0.0893046	LOC283788	-0.258153	MAP4K2	-0.031745	RP11-401E14.2	-1.38623	BC042534	0.433815
BBS7	-0.167	PPP1R11	0.292	LLGL2	0.127998	OPLAH	0.235325	CCBE1	-1.51596	MYO1D	-0.21418	PRKCDBP	0.49436	SDC4	0.44836	RABEPK	-0.0992805	CETN1	0.903617	HOTAIR	-2.60315	SNCA	0.734	CCDC53	-0.261508	MARCKSL1	-0.349052	SHTN1	0.104286	PFDN1	-0.0801463	ZSCAN31	-1.02096	ITGAX	-0.139347	FRMD4A	-0.219641	MAP3K6	0.026411	SPIN1	-0.359864	MAGEF1	0.245719
CNGB1	-0.44	ADIPOR1	0.371	GUCD1	0.305843	ATP2B4	-0.200885	HBS1L	0.982047	EGR1	-0.278938	C1orf51	-0.784432	GPR22	-0.372276	GABRD	-0.154604	TRPC1	-0.343576	EDN2	-1.76808	ALS2CR12	1.34	FAM208B	-0.913945	RMDN1	-0.239097	TBC1D16	0.113806	LRRC2	-0.182453	DIRAS1	0.559718	C8orf48	0.145335	LINC00470	0.144503	HADHSC	0.032655	SERPINI1	-0.666943	3q13	0.245719
ZNF85	-0.151	ADAM21P1	0.118	FAM107B	-0.336959	ZNF250	-0.192106	DUOXA1	0.889815	CDH17	0.128946	ARMC3	0.267454	MAML3	0.171735	CLPTM1L	-0.0921762	ZNF710	-0.332904	ZNF546	-2.12602	SCN9A	1.19	ANKRD13A	-0.958704	ANP32A	0.633496	FAM175A	0.0937116	LAMTOR1	-0.0528223	PTPN14	0.627606	SMURF2	0.132667	ANKRD12	0.289368	DNAI2	-0.0392955	EMP3	0.587197	BC010056	0.245719
MIR153-2	-0.109	HIST2H2AA3	0.42	PPP4R4	0.147817	HYKK	-0.444198	SLC25A37	0.730688	ASXL2	0.501233	ATF7	0.487307	PSMA1	-0.229348	CLUHP3	-0.0936243	CCDC9	-0.496814	FBP1	1.62695	CIC	0.436	SPARC	-1.2404	PER2	-0.28085	ACTR5	0.124607	BTBD11	-0.162324	XKR6	0.7687	RGCC	0.232854	LOC101929384	-0.125786	TRPA1	0.01921	linc-MCPH1-2	1.10316	OR8B12	-0.336145
MT2A	0.456	MED19	0.22	GMCL1	-0.242517	CHST7	0.281199	GTF2H1	0.409193	IFT172	0.326426	CENPL	0.769347	NDUFA9	-0.178152	PECR	-0.125717	ANGEL2	-0.911134	CHCHD5	2.61451	RAB31	0.906	CDC42-IT1	-0.996866	ARFGAP2	-0.189182	SMARCC1	0.0799582	BMP7	0.133435	ATXN1L	-0.495128	DHRS9	-0.10792	CCDC171	0.188569	CDKN2B	0.0242157	SNORD114-5	-1.01732	BC136863	-0.336145
CHKB	0.266	LOC101928278	0.151	LOC100505920	-0.173081	SAMD3	-0.347396	KDM5A	0.269499	ZNF761	0.181203	C20orf54	0.223834	UGP2	-0.30572	NDUFV1	-0.107064	RPS6KB2	-0.27429	CNN1	-2.61869	C9orf156	-1.57	SYK	-0.91325	KRBOX4	-0.222332	NOV	-0.084631	MRPL40	-0.070117	WDHD1	-1.11968	METTL13	-0.16474	AMER2	0.100144	CLC	-0.0373366	CCDC64B	-0.954243	TSR2	0.272689
COPG2	-0.144	MCM8	0.118	RDH14	-0.258022	LYZ	0.212715	TCAIM	-0.353957	NRN1	-0.183729	PHF1	-1.13837	CRISPLD2	0.343882	ABCD2	-0.137444	MMP17	-0.358323	LOC101929681	-0.72987	FAM174B	0.598	WDR61	-0.378613	ZNF75A	-0.271202	HNRNPUL1	0.0606265	ASNA1	-0.0786583	ZNF202	0.800476	NUDT9	-0.115061	BEND5	-0.220281	CDCA4	0.0628344	Y_RNA	-0.595394	BC011825	0.272689
NME3	0.191	SNORD12C	0.289	DDX27	-0.517282	MIR633	-0.158952	RGP1	-0.247465	NARG2	0.795683	CTLA4	-0.187353	WFS1	0.225872	C12orf43	-0.0935067	RBBP7	0.661798	RASL11A	-2.62977	CDK5RAP1	-0.889	NDUFS4	-0.392216	IFT80	-0.404528	OVGP1	0.0994544	FLJ45950	0.23548	STATH	-0.563558	TMEM106A	-0.152125	MAML3	-0.126579	MTMR4	0.0339582	VSNL1	-1.02629	HIST1H4G	0.286118
BMP8B	-0.53	TSSK4	-0.152	LOC643387	0.118713	CSAD	-0.194272	RASL11A	0.274788	VPS26A	0.323047	NBR1	-0.501849	TAX1BP1	-0.206914	AIP	-0.127257	POLR3F	0.336965	PLP1	1.81278	ZWINT	1.34	LOC100134368	0.249495	GATA2	-0.435131	ROBO3	0.0884561	C2orf66	0.146964	TMEM38A	0.643299	DICER1-AS1	0.0999416	BCO1	-0.153684	TRIM65	-0.0702381	SLC35B4	-0.351136	BC126276	0.286118
BAGE3	-0.0855	TTC39A	0.136	KDM2B	-0.214733	KDELR2	0.255402	GTF2F1	0.269993	IRF5	0.184565	JTB	0.672799	TMEM51	0.176244	RGS9	0.178899	SLC11A1	0.877645	IFNA21	-2.09616	GNL3L	-0.772	RHOBTB2	0.372733	PUS7	-0.312845	SATB2	0.120764	BNIP3L	-0.0766413	XKR5	0.514531	KIF1BP	-0.149101	PRR14L	-0.155995	RAI17	-0.0288331	FAM35B	0.772445	KBTBD6	0.212793
CREG1	0.347	TLR8	0.567	LOC154761	0.203041	KCNC1	0.180821	PACRGL	0.396607	CDHR3	0.121701	FBN1	0.46148	NDUFA4	-0.267446	ETV1	-0.233481	RSRC2	-0.223086	KIAA1671	2.35534	DSC2	1.11	CCDC88C	-0.50034	PHKB	-0.270499	LAT2	-0.145528	HMGB2	0.12406	GBA2	0.432854	TBL1XR1	-0.117426	MIB1	0.117296	C12orf60	0.0344439	SNORD114-14	-0.82399	KBTBD7	0.212793
CEP85L	-0.229	FAT4	0.133	GH2	-0.138797	SSBP3	-0.204823	ABCB5	-0.804173	ZNF473	-0.471011	STK16	-0.746266	DPYSL3	0.172462	FNDC5	-0.141683	ZFP36L1	0.299551	CHERP	2.31288	MICALL2	0.619	EML4	-0.366636	FCN2	0.184936	HAUS5	0.0966789	FIBP	-0.0741551	CARNS1	-0.774744	MINK1	0.0824871	CD3G	-0.124878	AKAP11	0.0302888	HMGB2	0.373879	BC000560	0.212793
TOR1B	0.162	TREML3P	0.151	KIAA0430	0.379101	XAGE2	0.169213	RNASEL	-0.865149	TPCN2	0.206232	AIM1	0.263538	ATP6V1B2	-0.479127	UROD	-0.129935	KLK3	-0.448286	OR8G1	3.23119	SLC38A5	0.457	THCAT158	-1.4628	DBR1	-0.248092	CCNB3	0.159122	AP2B1	-0.0709505	PDLIM3	-0.580126	AIP	-0.102174	LINC00929	-0.128115	CMAS	0.0336444	RP11-120K24.3	-0.942049	BC022033	0.212793
GPR88	0.124	PIGZ	0.105	ARX	0.145821	MAP4K5	-0.241034	ITGB1	1.21321	CTAGE5	0.304399	TM2D3	0.986329	ELAVL2	-0.307473	SFXN3	-0.111212	GUCY2D	-0.598968	LINC00299	2.44967	DARC	0.846	ZCCHC4	0.370949	FMN2	0.218424	LRP1B	0.0681975	GPAA1	-0.0663974	SLC44A4	0.65053	CNOT4	0.0670744	NUP43	-0.146408	ARID1A	0.0592122	ACTR1A	-0.311024	PPPDE1	0.233086
NFYC-AS1	-0.0967	UBE3D	0.156	KLHL8	-0.199468	SEC14L2	0.172119	FNBP1	-0.333987	POLR1B	0.513537	ZSCAN12	0.792628	PSMA2	-0.236395	GLYCTK	-0.0887379	GYG2	0.351458	LOC105369860	1.4077	RAPGEF3	-0.572	ARHGEF26	0.258385	OR1F1	0.1893	CENPC	0.0805137	SLC25A18	0.293531	SNORD38B	-0.727347	ACACB	0.173701	SOX5	-0.32594	FOLH1	-0.0537698	FGF12	-0.649352	1q44	0.233086
KRTAP20-3	0.131	ARMC6	0.171	DUSP21	-0.137688	PTGDR	-0.368579	SYT15	-1.1304	FMO1	0.112798	NFYC	-0.528434	TSPAN13	-0.27175	CEP95	0.125754	ACKR1	0.370941	MTOR	2.32843	DBT	-0.483	CALD1	-1.71239	MCOLN1	0.373227	HRASLS2	0.104596	TMEM50A	-0.0864732	C6orf62	-0.522089	C19orf70	-0.0725835	METTL7B	-0.12758	FLJ00060	-0.0381583	OLFM3	-0.953343	BC004485	0.233086
WWC2	0.0771	RDH14	-0.244	STX1A	-0.161605	RAD51	0.171606	LOC100289473	-0.735417	C1orf107	-0.425899	PRKAR2B	0.398065	MTF2	-0.286687	LINC01152	0.181265	CEP162	-0.685583	CD2AP	-1.01145	COL6A2	-0.614	CD6	-0.63416	PPOX	-0.254091	RANBP9	0.0570857	SLC15A2	0.217265	SPANXN2	-0.421374	MACROD2-IT1	0.0921743	CTBP1-AS2	-0.123634	NPFF	-0.0455343	LGALSL	-0.4628	AF151904	0.233086
CASP14	-0.0944	SLC29A4	-0.114	CREG1	0.453531	SOCS2	-0.308677	RCC1L	0.312538	GOLPH3	-0.224754	KIF2A	1.1203	RCN2	-0.317761	BDH1	-0.121164	RENBP	-0.683112	C4BPB	-1.74134	C9orf3	-0.989	FSTL1	-1.43276	MST1R	0.168206	NUCKS1	0.122249	LIFR	0.156123	UGT2B15	0.461826	TXNDC15	-0.0918136	WDR20	-0.129842	CENPA	0.049546	SACS	-0.396969	BC020640	0.233086
GRIA3	0.121	C1orf87	0.242	GNPDA1	0.188641	ASAP1	0.269664	SPATA5	-0.258066	CYP39A1	0.177948	HINT3	0.548794	C12orf43	-0.255208	OR5AS1	0.0932051	SPRR1B	0.709535	CARF	0.836645	MCC	0.544	TWIST2	0.338027	SKP2	-0.212136	ZNF77	0.0649331	IMPDH2	-0.121631	AJUBA	0.49991	CYTIP	-0.169122	RTN4RL1	-0.164238	DNAH10	-0.031303	RP11-379F4.4	-0.55568	BC040608	0.233086
TLCD1	0.1	DIDO1	0.137	EVA1B	0.178155	EGOT	0.19602	OFCC1	0.822789	SPOCK2	0.136651	LOC100287413	-0.209326	PARVA	0.190613	CYBB	-0.305949	PGD	0.306046	PLEKHA7	-2.15593	MYT1L	0.839	TBC1D1	0.724672	ZMAT1	-0.322872	PARP16	0.0771765	HIST1H2AC	0.128298	VCL	-0.341944	SLC39A12	0.386964	TMEM53	-0.136117	SGK3	0.0447782	VSX1	0.547276	NFU1	0.214669
NBPF9	-0.447	TXLNB	-0.0889	CDK5R1	-0.338024	LINC01144	0.164059	TCAM1P	-0.973346	YARS2	-0.617935	HIPK2	0.328336	CDKL5	0.142448	OXR1	-0.150622	ZMYND8	1.0639	LINC00894	-2.47552	DLG4	1.06	ZCCHC2	-1.24727	PKHD1L1	-0.344101	ZSWIM7	-0.0857477	ATP5H	-0.117782	AMER2	-0.491603	AMOT	0.172075	HEATR1	-0.204666	BRD3	0.0500409	SPTSSA	0.521276	BX538347	0.214669
MIR1224	0.194	DNAJC21	-0.12	ELK3	-0.152188	BLOC1S6	-0.440401	CD37	0.79581	HOXA2	0.100802	SEC14L2	-0.27078	PPP1CB	-0.183157	TOR1A	-0.118966	COG4	-0.282297	PRICKLE1	-1.01442	SCAPER	-1.05	FAM102A	0.294846	EEF1A1	-0.267139	EHBP1	0.0856015	SCARNA10	0.137056	FLVCR1	-1.17711	PEAK1	0.101648	CEACAM3	0.126571	ASPM	0.0717372	C12orf49	-0.265845	BC071734	-0.395613
AMMECR1	-0.119	TEX264	0.161	STK40	0.171403	ZNF628	-0.181092	PTGDR2	0.368401	SLAMF7	0.0827277	HS6ST2	0.871518	HNRNPDL	-0.184249	HERC3	-0.0793548	CD5L	0.906967	TBC1D21	-0.859463	TMEM147	0.75	CCNY	0.312815	QRSL1	-0.262526	NUDT22	-0.0695053	IL18	-0.148259	ZBTB7C	-0.570793	DEDD2	-0.101804	RIPK4	-0.414349	HIST1H3C	0.0416543	RPL36A	1.08408	RPS20P27	-0.395613
WRAP53	-0.189	LOC105376365	0.137	RPL10L	0.180295	KIAA0754	0.170792	LINC01395	0.501781	HLA-F	-0.570304	PLXNB2	0.350747	STMN2	-0.358356	CRACR2A	0.161404	MAPT	-0.32824	ACTN1	-2.02736	GDPD3	1.14	MKNK1-AS1	0.366423	ZDHHC21	-0.27625	OSBP	0.0829316	LIAS	-0.118129	SFMBT1	-0.862817	ARHGAP42	0.164123	NLGN4X	0.106035	SMPD3	0.0514679	PANK1	-0.416196	EPHX3	-0.451714
CHSY1	-0.185	FAM173B	0.155	SLC6A20	-0.124658	GIP	0.154447	FBXL21	-1.79423	SIGLEC1	0.105005	HYOU1	-1.04078	PIK3CB	-0.261505	ANGEL1	-0.0947162	OPTN	-0.33339	FGF7	-2.06365	MFAP3	-0.855	ADRA1A	0.243579	TP53INP2	-0.436978	GIGYF2	0.0543919	CLDN10	0.193887	POLR2J3	1.42615	SLC1A4	0.145757	ADAM9	-0.145483	OVOL1	0.0373624	GNA12	0.355984	AK026061	-0.451714
IBTK	-0.202	HIST2H3D	0.171	CPT1A	0.177991	TM2D3	-0.23659	CYHR1	0.318231	ACADL	0.119151	FAM174A	-0.682773	DAG1	0.20885	FAM101B	0.132066	SERPINB3	0.941887	UMODL1	-2.3333	KRT31	-0.619	INPP5D	-0.821085	ZNF347	-0.273455	HOXB2	0.150752	HECW2	-0.120274	HIF1A	-0.639507	TNFAIP8L3	0.0873641	ATP6V1C2	0.104933	DNAJC5G	-0.0626401	SMARCD2	0.466231	BATF	0.305787
FTL	0.229	GRN	0.578	MPC1	-0.299898	RBBP8NL	-0.185158	G6PC2	0.359468	AFF4	-0.333912	PNPLA1	0.276357	GRIK5	0.168443	UNC80	-0.139028	PAX3	0.477627	LAMA3	1.6584	RACGAP1P	0.627	N4BP2L2	-0.659965	ASPHD1	0.198229	CCDC77	0.0823502	TUBB	-0.0879042	CDKL2	0.715277	SPOP	-0.0990362	PHYKPL	-0.151093	ZC3H12A	0.0551058	CDK14	-0.675463	BC032294	0.305787
AK5	-0.129	ACTR6	-0.276	AHSP	1.24023	PDE1C	-0.196867	MTSS1	1.00318	APH1A	0.152894	LOC100128003	-0.257116	INPP4A	-0.441452	SLC25A11	-0.0903445	ABL1	0.674568	C20orf197	1.24085	PPP2R5C	-1.4	JADE2	-0.644806	FLT3LG	-0.476435	PPIG	0.0954365	APBB1	-0.111321	HEPACAM	0.467827	CDC42BPB	0.0695609	SERP2	-0.0865241	MGC39581	0.0258231	MIR600HG	-0.689863	DNM1L	-0.3896
TMBIM6	0.28	CNOT9	0.145	CTSZ	-0.46657	MTO1	-0.23932	LOC151121	0.622922	LGR4	0.148023	MYOM1	0.568159	ATP2B1	-0.320484	PRUNE2	-0.116211	SLC24A1	-0.415214	C8orf31	-2.60303	UBAP2	1.35	LINC00479	0.346591	ADGRA2	0.25834	TAPBP	-0.0570445	TMEFF2	-0.0973588	MIR610	-0.868237	C21orf2	-0.0715512	LINC01505	0.12497	KLF6	0.0247985	FAM163B	-1.06384	AK299926	-0.3896
MED25	0.324	OR52A5	0.132	WFDC1	0.130274	DNLZ	0.328939	ST7-OT4	0.890262	KLK8	0.125258	P2RY1	0.368987	CD200	-0.282815	RIMS1	-0.159899	TNNI3	-1.26709	KAZN	1.93502	ZBTB1	-1.16	DNAJC28	0.276184	PRKCI	-0.297995	PBX2	-0.0593834	KYNU	-0.121842	C1orf186	0.742206	CTNNBIP1	0.0912321	STOML3	-0.0986784	HNRPL	0.0616078	DNM1L	-0.371868	AK302565	-0.3896
GRHPR	0.216	AGAP1	-0.15	RHAG	0.133159	LOC155060	0.194395	ADH1C	0.883047	IL27	0.122144	CENPQ	0.992671	EPS8L1	0.191689	CORO1A	-0.12748	ADIRF	0.356351	SHANK2-AS3	0.825268	NBR2	-0.906	TPT1-AS1	-0.599571	CDC37L1	-0.250727	DLGAP1-AS4	-0.0761723	CASP10	-0.105111	SLC25A48	0.591147	ATP13A4	0.334876	ZNF718	-0.222773	SCRIB	0.056318	RP11-337A23.5	-0.503306	AF000430	-0.3896
C9orf72	0.318	PDE8B	0.11	PSMD13	0.256207	ZYX	0.340167	CDH11	-0.421728	LOC388796	0.168643	PLK1	0.30773	AP1S2	-0.366367	MIR15A	0.491288	CACNB1	-0.353093	PCDH9	2.55506	ZNF337	-0.729	PLEKHH3	0.308789	ZNF767P	-0.176396	ESCO1	0.06554	CYSLTR1	-0.116371	PCDHAC2	0.709354	RBM23	-0.0955204	PNLIPRP1	0.162065	TNC	0.0182193	HYAL3	-0.749255	AB006965	-0.3896
CNTROB	0.109	CFC1	0.13	CHPT1	0.722289	GRINA	0.413099	PSAP	0.258221	STX7	-0.345151	MAST4	-0.875565	ANKRD46	-0.275564	UNC93B1	0.0980152	ADAMTS3	-0.34323	MNX1	-1.03423	SYNM	-0.688	FBRS	-0.44834	POLR3A	-0.177261	USP33	0.0597522	PHYH	-0.118607	MOGAT2	0.798961	CPNE3	0.153652	VPS54	0.119672	VAMP4	0.0297161	BBS12	-0.622553	BC024590	-0.3896
LEPROT	0.354	PTPRC	-0.165	CLEC9A	-0.195325	SEZ6L2	-0.144497	BRAF	0.483044	MYL6B	-0.305808	MRAS	-0.608696	PRRC2A	0.26778	SV2B	-0.124635	CORO1A	-0.518602	LOC100133461	1.88092	TMEM180	-0.667	MYO9B	0.550612	VPS51	-0.314757	OAS1	-0.192776	CCDC43	-0.125163	FXYD4	-0.515324	KCNN3	0.169371	CA9	-0.288775	C18orf45	0.0531762	EPHX1	0.52386	AF151685	-0.3896
JUNB	0.528	ERVFRD-1	0.0989	ZBED9	-0.147151	CRYBB2	-0.184897	CFLAR	-0.971871	FAM150B	0.175613	SULT1C4	0.459165	TXN2	0.157735	SIRT5	-0.13382	CDHR1	-0.315393	ZNF471	1.82092	CNGB1	-0.502	HECA	-0.479884	TSN	-0.224585	LOC105369230	-0.348356	VARS	-0.0562005	RGS7	-1.35947	HAX1	-0.14613	PRR5L	0.117041	MCC	0.0275843	RNF41	-0.467224	AK291094	-0.3896
IREB2	-0.16	HCLS1	0.309	NR2C2AP	0.223081	KCTD3	0.161328	DNAH14	-0.861551	PMAIP1	0.263598	ATL1	0.405421	SMIM10L1	-0.313534	KCND3	-0.140353	VCAM1	0.924139	TRDMT1	-1.67852	RUNX1	-1.6	FRG1BP	-0.656181	ZWILCH	-0.251999	HLA-DRB4	-0.348356	RND3	-0.178201	DUSP21	-0.644543	FBXL15	-0.0896192	DMP1	0.143268	IL17RD	0.0237497	linc-APLN-1	0.964891	AF061795	-0.3896
TULP4	-0.197	PTGR1	0.163	IRF2BPL	-0.379259	DYNLL1	-0.321201	RANBP3	0.645297	ANKS4B	0.0863989	KIAA0895L	0.376877	EIF1AX	-0.231756	NMNAT2	-0.0844275	HCLS1	-0.300413	FOXP3	-1.25563	BDKRB2	1	SLC30A8	0.344934	PRUNE1	-0.193424	LOC100129846	0.132796	TM9SF4	-0.087009	MUT	0.699213	IMPA2	0.101533	SLC23A1	-0.117502	VPREB3	-0.026049	CADPS	-0.690701	AK294533	-0.3896
GNG8	0.157	LOC105371307	0.129	MOB4	-0.18765	PURA	-0.231401	CENPB	-0.322613	MAP4K4	-0.524283	ODC1	-1.0055	GNAL	-0.363253	NOVA1	-0.110694	TNK1	-0.326655	LOC100506142	1.84048	C16orf89	-1.14	MIR3681HG	0.32987	SMARCC2	-0.280497	RBPMS	0.132796	CHRDL1	0.15625	BTLA	-0.6011	SHMT2	-0.100305	LATS1	-0.160523	ZNF645	-0.0368859	CSTA	1.41331	AK298568	-0.3896
ACER1	0.101	CDSN	0.102	DGUOK	-0.185058	LMOD3	-0.49449	CYTL1	-1.13628	MRAS	-0.338918	ERCC4	0.777117	MT2A	0.420315	C17orf75	-0.145656	DDAH1	1.01048	LOC157931	-2.59156	PER3	1.02	F13A1	-0.999029	BOK	0.236883			CXorf66	0.063717	SERPINI2	-0.497909	GMNN	0.148887	DIDO1	-0.118888	TCF4	0.026042	CTD-2127H9.1	0.622476	AK293290	-0.3896
TMEM41B	-0.362	CLIP2	0.144	CXCL9	-0.135508	CRIP3	0.175087	PNLDC1	0.506067	ENPP3	0.104035	YKT6	0.436608	CHL1	-0.366199	PRPS1	-0.139033	GNS	-0.737834	BRD8	-1.22213	MRPL38	0.581	PECAM1	0.436477	CCDC65	-0.32205			ACAT2	-0.122825	PPARG	-2.94898	NUDT16	0.0837919	CYB5R1	0.10281	EPHB6	0.0316479	ASB13	-0.365891	AK123906	-0.3896
GPX1	0.364	INTS7	-0.198	NUDT22	0.223393	PPP2R5E	-0.182919	DCAF6	-0.348753	OR10AG1	0.133129	GPN3	0.974717	COX5A	-0.308533	ZNF419	0.0851989	CSNK2A1	0.308721	LOC100288123	2.29064	OR10Q1	0.581	IGFBP7-AS1	0.2904	FGFR2	0.183344			CTPS1	-0.0922728	ZC4H2	-0.828512	ZNF395	0.0820623	NTRK2	-0.137251	IL1F8	-0.035588	RP4-773A18.4	-0.621495	DACT1	0.42329
EIF1B	0.46	TWSG1	0.318	ACTRT1	0.193091	HMBOX1	-0.260925	CELF1	0.29428	GATA1	0.137535	SPANXN4	-0.180091	ARHGEF15	0.196779	ZKSCAN8	0.133547	HYOU1	-0.20859	BCAN	-0.834263	STK3	0.556	SMARCD3	0.472275	SLC20A2	-0.233391			MEPE	0.266787	CNPY2	0.528895	GPR179	-0.0891797	TRDN	-0.179915	CNDP2	0.0272173	FEM1B	-0.381372	AK299879	0.42329
C10orf90	0.0826	LIMK2	-0.133	IL15	0.151663	LAMC2	-0.150615	ITPR2	-1.32136	ATP6V1E1	-0.232065	PCSK7	0.381215	TAF9B	-0.322177	MT1DP	0.158228	NCDN	-0.367609	RAB7B	-2.81104	METTL7A	-0.379	PML	0.419421	LRR1	-0.221519			NIPA2	-0.105536	STK16	-0.840736	VASN	0.0890745	ADGRV1	0.137927	ALB	-0.0467834	VKORC1L1	-0.322287	NTRK1	-0.246164
LY6G6F	0.165	RNF165	-0.472	GABARAPL2	0.385292	PDZD3	0.188908	FOPNL	0.344962	ECE1	0.169462	PRKG1	0.830294	EZR	0.470441	STK11IP	-0.0991814	NECTIN2	0.287121	LINC01089	-2.14941	TMEM40	0.685	NAA25	-0.476824	PHF20L1	-0.295197			THNSL2	0.122084	LOC105373356	0.459261	SNORD34	-0.192797	LOC100506282	0.144642	GSG1	-0.0636411	CHAC1	-0.843537	M23102	-0.246164
DKFZP564C152	-0.175	LSM5	-0.335	DCLK3	-0.187543	CYMP	-0.19137	IKZF2	0.810813	PTCRA	0.104351	GK	1.61026	TSPYL4	-0.203116	METAP1D	-0.138292	AIMP1	0.337179	PHACTR2	2.93173	GPBP1L1	1.2	LOC729815	0.227079	SESN1	-0.271915			TSSC1	-0.118071	SEPT14	0.375648	PARVA	0.12723	ATP6	-0.16391	SCGB2A1	-0.058357	TPRG1L	-0.67404	QPCT	0.380515
FADS2	-0.101	CABP2	-0.132	B4GALT3	0.246834	MTMR12	0.217185	ZNF354A	-0.536794	SDCBP2	0.1468	PTP4A2	-0.403108	HNRNPK	-0.240233	LZTR1	-0.111077	POLE	-0.818887	ZNF221	1.75297	C16orf7	0.595	POLR2A	0.332575	ERV3-1	-0.395134			GOT2	-0.10529	WNK2	0.51079	WBP2	0.0702354	LOC286382	-0.112366	CDKN1C	0.0506621	GNG5	0.762424	BC047756	0.380515
PSAT1	0.162	MINK1	-0.188	RAB11FIP5	0.186942	DLX1	0.180176	MAGIX	-0.437298	NCL	-0.25994	SCRN1	-0.505721	NFATC3	0.215755	FIBP	-0.100659	P2RY1	0.697854	STX2	-1.67004	TTC9B	0.738	ZSCAN29	-0.458331	NDUFS7	-0.237975			SUMF2	-0.0625964	ARHGAP35	0.549343	CXCR4	-0.23242	DNHD1	0.202786	AMHR2	-0.0359913	IFI16	0.792518	CA4	0.399853
ARG1	0.129	ADI1	0.394	ALOX5	0.160978	ZNF727	-0.176753	LATS2	-0.622055	RLTPR	0.375025	DENR	0.663664	CLTA	-0.191458	QRSL1	-0.118878	IQGAP2	-0.430501	CFAP61	1.72893	NRBP1	0.528	GTF2H3	-0.798554	MYNN	-0.213503			CHIC1	-0.0962912	STX18-AS1	0.803715	LOC284581	0.32269	USP9X	-0.158094	TGFB2	0.0441917	SNAP25	-0.964559	17q23	0.399853
HIST1H2BI	0.0877	ST7	0.251	EXOC3L4	-0.114716	NEUROG3	-0.204819	LOC100128198	0.742796	Septin 8	-0.522627	ZNF195	-0.746458	DYNC1I1	-0.359054	FAM167A	0.14621	KCNN3	0.440621	TEK	2.06829	SSR2	0.571	ARR3	0.281612	NUMA1	-0.17669			GLI3	0.175152	CHD6	0.525773	ANKRD54	-0.0634316	ZP4	0.141564	P2RX5	-0.0728316	CTD-2292M16.8	-0.65091	BC057792	0.399853
NTMT1	0.165	PALMD	-0.149	XBP1	0.446435	RMI2	0.191604	SSBP4	1.00215	PKM2	-0.415894	INSIG1	-0.440886	NSG1	-0.423919	PSMA8	0.0765233	NPRL2	-0.30772	OR1D2	-2.2399	UTY	-0.609	SFPQ	-0.595219	CD47	0.392715			VPS33A	-0.123726	MYLPF	-0.422985	PBXIP1	0.153141	PRMT9	-0.11278	FMO3	-0.0280316	SNAP91	-0.782544	BLOC1S2	0.309988
GRIPAP1	-0.0898	FAM19A3	-0.102	TBC1D24	-0.181169	FGF9	-0.244783	FRS2	0.332515	CCM2	0.121053	POLR2K	0.342543	PPID	-0.557008	LAMTOR1	-0.0942039	SMAGP	0.740243	BAZ1B	-0.983131	PRTN3	-0.439	EXTL3	0.510647	BPNT1	-0.240405			ACY1	-0.0834399	RHOT1	-0.833538	VLDLR	-0.147102	LSM8	0.134982	BTD	-0.0366805	CDK5	-0.62898	AK298969	0.309988
SLC14A1	0.341	BRAP	-0.136	AFG3L2	-0.29722	MAP3K2	-0.196718	PRUNE2	0.657617	CD86	0.0970263	UBL7	0.613617	STARD3	0.206424	RGL2	-0.10654	LILRA1	0.822706	EBF3	2.75591	PDZD9	-0.976	F2R	-0.822678	WIPF1	-0.201627			LAMB1	-0.308831	PTPN22	0.436842	DUSP6	-0.25527	FBXL13	0.12083	DNMT3A	0.0585129	CRYM	-0.988198	PPARG	0.29826
RCN2	-0.187	RANBP17	0.111	CETN2	0.248847	SYNE4	-0.20689	ADAM17	0.356385	PINX1	-0.253688	TRMT6	1.20844	TTYH1	0.335612	ASPHD1	-0.0931272	NAMPT	0.425813	FGFR4	2.04064	CD109	1.13	XPNPEP1	-0.507249	USP47	-0.192499			FCGR3A	-0.177412	PRDM16	-0.52465	FNDC9	-0.161271	SLC35B3	0.122498	FLJ35784	0.0503332	MEST	-0.674332	3p25	0.29826
ERO1B	-0.115	MRC2	-0.17	KIF1B	-0.154405	NABP1	-0.184617	NEK11	0.714757	PCDHGA11	0.0973323	PRMT6	0.764295	RNF14	-0.259857	VPS51	-0.111373	PRIM2	0.32273	LOC285766	1.71232	KIAA0913	0.419	LATS2	-0.671227	ZNF823	-0.278033			APOL1	-0.122563	TRAF5	-1.34065	EDN1	0.266798	LARS	0.169788	GATA4	0.0233975	HTR2C	-0.69257	AB472042	0.29826
POP4	-0.154	STAG1	-0.243	FURIN	0.235682	TCF7L2	0.253284	USP36	0.682343	LGALS9	0.171634	HNRNPH1	0.33444	YIPF5	-0.348671	HMGB3P1	0.188649	KCNV1	-1.08184	LOC100128281	1.06151	EIF4EBP2	0.441	MRPS31	-0.45824	SCAI	-0.374466			MRC1	-0.169999	RGN	1.26011	CHCHD4	-0.085186	HDGFRP3	0.165475	SPAG4L	-0.0555855	MIR548A3	-0.884908	LRPAP1	0.274229
MXD4	-0.318	KCNN4	0.174	ANKRD30BL	-0.166755	KCTD12	1.25417	DRC1	0.614012	CEACAM7	0.11842	IGLL5	0.254675	NMU	-0.217879	UBA5	-0.0805108	GLRX3	-1.02683	ACTL9	-2.15653	SORBS1	0.714	JAK3	0.37076	ZNF502	-0.320855			SMIM7	-0.0704859	BEST2	0.365388	CYTH2	-0.112121	RP9	0.149523	RNF41	0.0262124	INA	-0.99999	AK292321	0.274229
QDPR	-0.161	ARPC4	0.38	LOC101927855	0.136287	NLGN4X	0.199453	SPRED2	0.546721	MTRR	0.434697	OR2K2	0.205424	TIGAR	-0.260435	ADCY8	-0.156782	GHRHR	0.523398	RGS7	-1.99972	TMC4	0.828	GAS1	0.34026	C1GALT1	0.331221			CCL3	-0.120648	BTN2A2	0.754999	TAGAP	-0.129526	RNF31	0.0944729	UBE2F	0.0296168	ABHD14A	-0.465043	HSPA1L	0.293274
RNF20	-0.246	EIF3M	-0.308	TERF2IP	0.388341	MIR1915	-0.180556	CARD14	0.42156	PAPPA2	0.111857	MRPS22	0.801399	TAS2R1	0.167642	ABCC2	0.127929	KIF5B	0.555774	CCL16	2.19477	HLX	0.726	CCDC14	-0.382083	TRAPPC2	-0.200707			TOR1A	-0.139115	RSPH9	0.715829	SLC25A20	0.168697	COX6B2	0.151084	ZIM2	-0.0486736	J01415.21	1.04138	BC034483	0.293274
PTGS2	0.563	COPS8	-0.202	UTY	-0.198283	AK4	0.192591	LOC101928409	-0.566476	DBT	0.402382	Septin 7	-0.209106	CCSER2	-0.216981	MORN1	-0.0778492	VPS13D	-0.267272	TRIM62	1.77688	MLL4	-0.367	TRIB3	0.370817	MRPL55	-0.18905			MOCS1	0.0582203	SAA1	0.556287	FLJ45950	0.266123	HIST1H1T	0.121987	PLCXD2	0.0487091	VSTM5	-0.762482	AK295416	0.293274
ZNF529	-0.226	AKR1A1	0.278	ARL4A	0.330476	OLR1	-0.207197	KIAA1656	0.805714	CD180	0.111552	LAMP2	0.9175	PAM	-0.236987	B4GAT1	-0.130996	CACNB3	-0.226192	AVL9	2.04174	HOXA13	0.671	LOC100506371	0.364346	LEF1	-0.353125			ATF4	-0.122904	PQBP1	-0.427333	RIPK1	0.125044	TGM7	0.135437	BAG4	-0.0490102	NRIP3	-0.797534	D85730	0.293274
CNOT4	0.15	CACNA1A	0.143	EGOT	-0.17021	CLN6	0.257414	DET1	0.748185	C19orf39	0.216493	PCDHB2	1.2902	CLCN4	-0.205825	CLMP	-0.232532	LBP	-0.358567	LOC100505985	2.11106	SOAT2	0.713	PID1	0.533676	FAM104B	-0.150253			STX8	-0.103817	C2orf48	-0.638497	ZBTB4	0.0769224	RBP7	0.10165	FLJ38984	0.0270542	SORBS3	0.470713	AK302179	0.293274
ATP5S	0.167	ZFYVE1	0.18	WWC2	0.0975738	PIP5K1B	-0.199389	LOC285181	0.849426	CDC42BPA	-0.541521	MARCKSL1	-0.761464	DR1	-0.225729	SLC5A6	-0.141526	PDCL	-0.809437	SEC14L1	1.61658	RAB3IP	1.02	RUFY2	-0.804844	NMD3	-0.183582			COA7	-0.114639	HBG2	0.623019	KIAA1671	0.113539	PID1	-0.128516	GRM1	0.0229609	APCDD1	0.441046	AK223386	0.293274
ATP6V0D1	0.348	ACVR1C	-0.133	IL17RC	0.151201	AGL	-0.185018	LINC00479	0.43349	CCNA2	0.216836	ATXN7L1	-1.46665	ADO	-0.245193	MFSD6	-0.102617	IGHA2	-0.983559	LOC102725022	-2.83602	CDK13	-1.2	UBE3A	0.270464	ADCY5	0.147372			MIR365A	0.0869457	RAPSN	-0.41533	NOTCH2	0.257841	GFM1	-0.180196	KRT1	-0.0373474	REPS2	-0.40799	BC033054	0.282518
SHISA9	0.105	MBNL3	-0.251	MUC6	0.586787	ZFP64	-0.179856	KIF26B	-0.894085	UNC80	0.259974	LPCAT2	1.46722	PPT1	-0.152596	ZNF33A	-0.134752	IGHA1	-0.983559	ERBB2	1.99047	GOLGA8A	-1.26	VPS13A	-0.528751	TARBP2	-0.161155			AZIN2	-0.0725168	PQLC2	0.829933	CPT1A	0.15401	LOC101929734	-0.122785	HRASLS	0.0291267	RP11-549B18.1	-0.621575	C2orf52	0.282518
LOC646938	0.119	PRR3	-0.16	FAR1	-0.245571	SNORA33	-0.399713	C15orf61	-0.311145	TRIM4	0.306792	IK	-0.589559	CDKN1A	0.282032	COX8A	-0.135824	IGH	-0.983559	LOC101928833	2.65104	SLC12A4	0.833	ZDHHC21	-0.505344	NOM1	-0.211594			XRCC4	-0.0983372	CPB1	-1.90487	DCDC1	0.17564	SPTSSB	-0.140802	UTP14C	-0.0394589	C2orf50	-0.676921	FANCL	0.294174
IL18BP	-0.114	TCN1	-0.109	ESF1	-0.130589	C1orf122	0.231403	DLG4	0.777908	SLC39A14	-0.556131	C12orf48	0.84261	HSPG2	0.178777	P4HTM	-0.113022	MIR1204	-1.58172	LOC101928101	-2.2382	KLRC1	-1.2	UGCG	-0.481219	SLC25A33	-0.225197			UQCR11	-0.0789582	LSS	-0.624299	HAPLN1	-0.195721	CNGA4	-0.144742	C19orf33	-0.0465449	HERC2P3	1.0622	VRK2	0.294174
MIR2052	0.0996	PAXBP1	-0.307	PDCD10	0.265862	PRKCSH	0.221948	IRGM	1.0571	FAM126B	0.339912	LOC100288413	0.586339	RAB21	-0.282961	HIST1H1D	0.250321	PVT1	-1.58172	DLG1	-0.955793	SFRS8	-0.397	LOC101929757	0.309816	CDIP1	-0.258458			PTPRJ	-0.0971925	AJAP1	0.669062	SLC13A5	0.177506	RHOU	-0.328542	NPY5R	0.0177825	SMYD2	-0.709731	BC054517	0.294174
GSDMB	-0.301	MYO1C	0.131	FAT1	-0.1587	GPC5	0.286296	LOC401220	-0.947575	CLASP2	-0.592837	CLASP2	0.511414	HINT1	-0.325705	SOCS5	-0.0938549	LOC102724652	1.08353	PTPRJ	2.01887	GSTO2	0.687	NIFK-AS1	-0.349539	FBLN1	0.197713			METTL13	-0.163077	RPL31P11	-0.533254	CACNA1I	0.125874	RRP12	0.10977	ARL3	-0.0344307	C1orf109	-0.371441	RPL21P44	-0.407004
CHD1	-0.205	GAPDH	0.433	PPP1R12B	-0.22169	MTMR2	-0.198059	DOCK8	0.414175	LSS	0.18401	RCBTB2	0.711686	MYO15A	0.105836	SACM1L	-0.11162	CRYAA	1.08353	PDE3A	-1.95895	HTT	0.632	SLC2A9	0.32181	SPICE1	-0.279632			MAP3K13	-0.129514	KHDC1L	-0.58307	ZNF716	0.127184	LOC644090	-0.121774	ICAM5	0.0304371	NUDCD3	-0.420302	4q12	-0.407004
NXF1	0.287	MRPS6	-0.207	C1QTNF2	-0.130437	C7orf50	0.398095	ADCK5	-0.615203	RBM8A	-0.279482	GNAQ	-0.404676	DDX25	-0.198809	USP46	-0.113697	LOC100505585	-0.468826	NLRP6	1.21865	HECTD2	-0.662	TSC2	-0.414648	HOOK1	-0.360051			PHB2	-0.0787369	OR8J3	0.599481	ATP1B2	0.245876	ZNF107	0.211238	HPS4	-0.0595875	TUBB4B	-0.600538	ANKRD39	0.195966
GUSB	0.178	C1QTNF9	0.13	BATF3	-0.221008	H1FX	0.343816	KCNJ5	0.697171	NSMCE1	-0.466938	SETD5	0.771129	ARHGEF9	-0.266561	HECW2	-0.139123	ARHGEF1	-0.468826	ARSJ	-2.37716	MOCS1	0.852	ADAT2	-0.472652	GBP1	0.508423			SLC7A7	-0.112966	FAM151A	-0.494557	KYNU	-0.13132	UQCC3	-0.145973	GAB1	-0.0522836	STAMBPL1	-0.364631	BC031303	0.195966
EIF4G3	-0.222	RAD51	-0.68	PSMC3IP	-0.12624	SH2D5	0.187818	GBA3	0.413004	ZBED4	0.429832	YIPF7	0.450285	FZD3	-0.335195	MTCH2	-0.0969677	PIR-FIGF	-1.12072	ARHGEF12	-2.87607	CAD	0.848	WFIKKN1	0.304158	TMED5	0.158721			FMO2	-0.160113	COL4A5	-0.681875	HMGN3	0.107366	LRRK2	-0.361667	STX16	0.046922	SYNJ1	-0.6085	C15orf40	0.244636
RPS26	-0.113	BOLA2	0.22	GIGYF1	-0.214734	AGPAT2	0.259134	MICAL3	0.719602	SERPINE1	0.138049	FKBP9	-0.956878	TAZ	0.165104	SIAE	-0.143422	FIGF	-1.12072	ZNF235	-0.912134	PPM1A	0.556	PELI1	-0.911056	EIF4E3	0.245363			SLC47A1	-0.101716	TNFRSF8	-0.367244	RIDA	0.181077	MYSM1	-0.128405	IGFBP6	0.0325345	ATP1A1	-0.615333	BC019820	0.244636
UBB	0.334	ZNF92	0.0939	MT2A	0.501414	WDR26	-0.326679	ARFGAP1	0.863161	TPRG1	0.125408	XPNPEP3	0.870018	SCNN1A	0.201691	LINC00311	-0.108082	LOC101060386	1.57273	COL8A1	-2.35586	PRKY	-0.934	LOC400940	0.264174	TBRG4	-0.226215			MRPS10	-0.107594	HEPN1	0.444848	NR2E1	0.253337	DR1	0.148439	SLC35A3	0.0340163	FAM20B	-0.423048	PCDHB13	0.239021
RPL13AP17	0.0898	LINC00853	0.206	HLA-DPB2	-0.116805	OR9Q2	-0.191223	DHRS13	-0.385781	SLC6A19	0.133899	OSBPL5	0.207682	MLLT11	-0.276786	TSEN54	0.0863841	BOLA2	1.57273	KY	1.43675	FECH	1.32	IFNGR1	-0.868425	FAM213A	-0.347269			WDFY4	-0.0915685	NKPD1	-0.434237	SYCP3	0.0988576	KANSL1-AS1	0.418999	TBX19	-0.0325235	CKAP4	-0.30854	5q31	0.239021
MIR495	0.122	ARG1	0.138	THEG	0.132105	MDH2	0.22003	HKDC1	0.661263	UNC50	-0.408842	CLK2	1.11547	CUL1	-0.249427	NFYC	-0.105646	SMG1	1.57273	GP5	-1.59188	BNIP3L	0.754	FOXL1	0.347227	TP53	-0.346564			EMC1	-0.117315	HERC2P7	-0.505813	PYDC2	0.121353	CCDC37-AS1	0.155077	SLC5A7	-0.023919	TAF4B	-0.414615	AF217745	0.239021
VTRNA1-1	0.16	IRF1	0.495	CLDN8	-0.111729	IPP	-0.25149	NPPA	-0.560071	CRYM	-0.139393	ZMYND11	-0.768837	LGALS8	-0.241629	PPIEL	0.1166	SNORD65	0.619382	PTPRD	1.79989	FITM1	0.434	ZBTB1	-0.790916	DKFZP434A062	0.176641			RAB36	0.0623703	FOXK1	-0.53815	TFCP2L1	0.118341	SPINK4	0.155779	NALP5	-0.0233096	RP11-123O10.3	-0.734336	C21orf7	-0.283214
RAD51	-0.537	TOX2	-0.351	STAM	0.217178	MIEN1	-0.14186	LOC101928661	0.306683	DAO	0.113928	ANKRD6	0.908693	NCBP1	-0.155233	HIVEP1	-0.123382	SNORD49B	0.619382	LOC101927339	-1.81895	APPL2	-0.514	MDN1	-0.563799	ZNF100	-0.166832			SLC7A10	0.093768	RHOH	-0.647673	WRB	-0.108431	CYP4F62P	0.1238	UVRAG	0.0812093	SLC39A3	-0.631666	AF269162	-0.283214
SORBS2	0.0769	KCNC4	-0.107	PUM3	0.191488	CCDC122	0.159671	RNF41	0.289937	HBS1L	0.428606	LRRC49	0.78986	GPR4	0.181553	ARHGEF9	-0.0936249	LRRC75A-AS1	0.619382	PON3	-1.48615	FLJ36031	1.01	POGK	-1.02397	BDNF	0.14097			VLDLR	-0.181443	MUC15	-0.576133	TRIM24	0.0871196	CNPY2	-0.138982	LOC126295	-0.0833172	HMGN5	0.758269	AF269163	-0.283214
ANK1	0.309	SPI1	0.43	ATF6	-0.375424	POLR2J4	-0.213763	RPS16P5	0.506312	SNORD94	-0.444842	LEO1	-0.97783	LMO4	-0.328767	DMKN	0.0835387	SNORD49A	0.619382	TMEM105	-1.5585	WIPF3	-0.63	GJB1	0.337869	KCND3	-0.301335			EMID1	0.0648273	HOXA10	-0.872025	UTS2B	-0.0972672	LOC283485	0.320694	CDH13	-0.0268786	RPL7L1	-0.307677	AY171599	-0.283214
FAM86JP	-0.101	FUT11	-0.189	MGAT4B	0.182085	USP6	0.219515	CNBP	0.297692	DDR2	0.291908	APOL1	-0.232671	ASNSD1	-0.268864	PFKM	-0.111417	MIR8071-2	0.908237	COL22A1	-1.02835	C20orf103	0.649	ZFPL1	0.389052	SMARCC1	-0.16859			SDS	0.149792	HGC6.3	0.567882	RPL34	0.0886821	GDNF	0.0838981	ADPN	0.0505281	PPEF1	-0.713626	AF269164	-0.283214
UBE3D	0.12	AAED1	0.231	SPATA32	0.116127	TMEM72	0.194168	CFTR	0.604618	HNRNPUL2	-0.313771	GABRR3	-0.333741	TBC1D9B	0.117735	RPL41	-0.143557	MIR8071-1	0.908237	SLC44A4	2.22478	ZDHHC12	0.484	ACSS1	0.428932	PLXNA4	0.147361			SLC25A3	-0.0930615	CACNB1	0.430139	SPINK7	-0.0775199	EEF1D	0.264397	PMCH	-0.0389795	FAM131A	-0.691633	AF269161	-0.283214
PAM16	0.174	ACSM2B	0.216	NFATC1	-0.233546	MCOLN2	-0.321029	ENOSF1	0.381336	LATS1	0.453071	TM9SF4	0.99233	ARF4	-0.192643	SFRP1	0.183976	IGHV4-31	0.908237	LOC339260	1.53605	PTPRA	1.18	TP73	0.407884	PF4V1	-1.01712			USF1	-0.140228	SMIM22	-0.58109	NIPA2	-0.144401	ZNF414	0.119093	FLJ10292	0.0565885	RP11-484P15.2	-1.11715	BC008567	-0.283214
KCNC4	-0.0832	OR2J3	-0.136	ORC5	0.105148	MRC2	-0.199592	ATF3	0.672935	C20orf118	0.134286	ELL2	0.707246	ADRA2B	0.17772	SYT1	-0.0945128	IGHM	0.908237	ZSCAN23	-3.12988	CUL7	1.02	KCNAB2	0.519181	PDILT	0.182839			PLCH1	-0.191083	HNRNPA3P1	-0.565566	CUL1	-0.113223	AFG3L1P	-0.265994	CDKN2A	0.0439391	LSM4	-0.492446	AK294287	-0.283214
UBAC1	0.194	SAT1	0.293	WBP1L	-0.217451	UBE2E3	-0.21996	MAGEA6	0.778376	RPE	0.264055	ASAH1	1.2751	LRAT	0.142068	ELP3	-0.0910076	IGHG4	0.908237	CC2D2A	-1.66572	NCOA5	-0.799	LPCAT4	0.36814	CHML	-0.309924			TTPAL	-0.121833	KRT74	-0.423315	NDUFS4	-0.0923188	FANCM	-0.229756	NIT1	0.0205398	PRX	0.589275	EF219159	-0.283214
DCAF12	0.596	PTPN2	0.156	MUC16	-0.168283	CRACR2B	-0.282331	C19orf12	-0.393227	STK4	0.266859	SIGLEC8	-0.22748	HSPH1	-0.312446	AVPI1	-0.100015	IGHG3	0.908237	KCNJ3	-1.64667	NRP1	0.971	LOC254028	0.342828	MAFK	-0.181981			GPS1	-0.0787328	PGA3	-0.749045	PRDM10	-0.103835	CST13P	-0.143164	KIAA1704	-0.0216481	RAB27B	-0.996698	EF219160	-0.283214
NBPF14	-0.161	METTL21A	0.325	TGIF1	0.227512	CCT6B	0.220338	PRM2	0.49173	CNDP2	-0.650802	ATRNL1	0.843155	ATP1B2	0.374401	SMIM20	-0.0972408	IGHG2	0.908237	LRRC71	1.97609	C11orf51	0.588	PANX1	-0.659003	POLR3B	-0.215858			GIMAP8	-0.0736492	SIM2	-0.518372	CYP2U1	0.0794073	SLC25A24	-0.17684	VWA2	0.0486897	PRKCE	-0.663577	EF219158	-0.283214
UBE2Q2	-0.276	IL18RAP	-0.717	TRIM16	0.118671	ANOS1	-0.180447	IQCH	0.45532	VPS52	-0.615618	CUL7	0.927286	STRAP	-0.21335	ANGPTL3	0.123428	IGHG1	0.908237	LOC100507654	-2.52204	ROGDI	0.665	RAP1B	-0.299483	SPIN3	-0.286979			IMPA2	0.104191	EGFR	0.440962	SEC31B	0.0905189	ARNTL	0.226233	COX6C	0.0195057	CTD-2366F13.1	-0.676805	AY033900	-0.283214
PPFIA1	0.132	HMGN2	0.177	PMCHL1	-0.189465	NPIPA1	-0.229353	WDR66	0.519342	DMD	-0.631736	ZCCHC12	0.552081	ATF5	0.219734	CENPM	0.10179	CELA3B	0.646777	ATP2B2	1.99901	DMC1	1.24	C7orf73	-0.66145	LOC101930026	0.215844			EPHX1	0.127674	SPATA19	0.668093	C6orf62	-0.113124	A1BG	0.135219	IFRD1	-0.0876572	ITPRIP	0.607831	AK122780	-0.283214
MAGEA6	0.0947	EXOSC5	0.203	ZNF222	0.152794	BRAP	-0.157433	ALDH3B1	0.426964	HAS3	0.11443	DTYMK	0.393701	NAP1L1	-0.224124	SMS	-0.0954029	CELA3A	0.646777	ZEB2	-2.4265	STAG3L4	-1.23	RNF213	-0.950473	HNRNPH1	-0.216656			CFH	-0.241768	NIPAL4	0.569547	ANO4	-0.155934	LOC100506691	0.135988	FEN1	0.0946228	C22orf25	-0.293597	AK056341	-0.283214
OSTC	-0.222	RAPSN	0.146	BAMBI	0.157504	CLIP2	0.180049	LOC401098	0.953263	PPP4R1	0.271794	DZIP1L	-0.222301	PLD2	0.171909	KRT8P41	0.0887759	PCDHGB5	-1.23804	SMIM12	0.974701	KEL	0.703	CDHR5	0.406796	GS1-124K5.4	-0.210547			MRVI1	0.153631	C18orf12	0.6933	ITGB3BP	0.18342	SLC6A11	-0.0913395	CD209	-0.0491462	GALNT14	-0.683748	OR6K3	-0.417997
NDUFA7	0.208	DENR	-0.247	MAPK14	-0.135835	ATP11C	0.168294	ACSM2B	0.840396	TCF7	0.0964035	HNRNPU	-0.221704	EHBP1	-0.223844	PID1	-0.133506	PCDHGB4	-1.23804	SLITRK3	2.04886	CNST	-1.02	FAM107B	-0.462749	DRAXIN	0.276776			PDK4	0.313035	MPPED1	-0.509299	IDH3G	-0.138126	TRAT1	0.286006	FGF9	0.0316969	CHTF8	-0.29633	GOLGA8B	-0.393785
ABCG4	0.127	NBPF14	-0.197	LCMT1	0.160521	SHROOM4	-0.499597	POSTN	-1.66467	HTRA1	-0.513036	SLC26A5	-0.216127	RPL18	0.180733	RAB6B	-0.0978209	LOC100507353	-0.317849	LOC100130429	-2.00108	GCLM	0.88	DOCK10	-0.634979	LYRM7	-0.276018			CFAP43	0.155479	PPIAL4C	-0.511916	GEMIN7	-0.107573	OFCC1	0.127259	MRRF	0.0219431	BEX1	-0.670489	15q14	-0.393785
GTF2F2	-0.139	PDDC1	0.147	PDLIM2	0.147893	PACS2	0.203692	MLLT1	0.689816	HLA-H	0.115015	PSMC2	-0.36848	CD6	0.167906	HIPK3	-0.0977737	CACNA1A	-0.317849	NFIA	1.63003	SH3BGRL3	0.511	KLHDC10	0.269863	FAM161A	-0.222784			IFIT2	-0.18995	SMAD5	-0.634424	CACHD1	0.205409	CFI	0.150222	KIAA0963	-0.0534759	RET	-0.818232	GOLGA8A	-0.393785
DMBX1	0.121	GDNF	0.13	SCRN1	-0.275996	EFCAB13	0.15698	FARSB	0.533381	IP6K2	-0.318452	ZNF558	0.844392	ACACB	0.211916	SCARNA7	0.101637	SNORA64	0.329624	GCC1	-1.98457	FAH	0.679	ELK4	0.356134	ZNF880	-0.242907			GNG5	0.140384	C1orf116	1.00528	LOC100130713	0.135666	N4BP2L2-IT2	0.11549	TRIAD3	-0.0343478	linc-CPEB2-4	-0.893935	AF204231	-0.393785
RBM22	-0.241	SH3YL1	-0.576	ZNF727	0.150976	MCM3AP-AS1	-0.170455	MTHFR	0.882906	OR51I1	0.117098	RAB11FIP1	-0.189894	PHKB	-0.221506	PYROXD1	-0.185793	RPS2	0.329624	HHLA2	-2.90853	SLC25A19	0.649	TSC22D1	0.341777	LENG9	0.141553			LRRCC1	0.116362	FAAP20	0.4443	C8orf34	-0.125856	TAF15	-0.468092	CHRDL1	0.0355186	RASSF5	-0.531449	BC144610	-0.393785
MIA2	0.0808	INTS2	-0.221	AMACR	-0.165836	GLRA3	0.195407	LCN15	0.929412	FAM49A	-0.476388	PDPK1	-1.10286	RPS15	0.136194	FAM183BP	0.189591	BLOC1S1-RDH5	-0.609636	CROCC	2.45266	KRT15	0.541	NSUN6	-0.792138	BAG5	-0.329462			CRAT	0.0522774	FAM227B	0.727877	KAZN	-0.068923	IDI1	-0.151157	OTUD7	-0.0671909	MYADML2	-0.82924	MLYCD	0.281395
NFAT5	-0.172	RALB	0.302	RBM38	0.524581	A1BG	-0.153713	LOC55338	0.431986	IFITM5	0.130415	HNRNPL	1.24444	PFN2	-0.193218	C6orf136	-0.11065	RDH5	-0.609636	GAGE3	-1.20199	PKD2L2	-0.654	CAPRIN2	-0.458238	TXLNA	-0.226358			CYP24A1	-0.0960917	ACAD8	-0.48235	APBB3	-0.0845551	ABCG5	-0.139852	FLJ38991	0.0285781	DMXL2	-0.483469	16q24	0.281395
FOXP1	-0.223	RABGGTA	0.155	NOL8	-0.394211	RPL27A	0.180394	FREM1	0.550212	PARVG	0.147467	OS9	0.915838	AMACR	0.193673	SIN3A	0.126901	CPT1A	-0.609636	ATP5E	1.14799	WDR92	0.796	DNM3	-1.3163	ZNF544	-0.213153			S100A11	-0.139008	CLDN14	0.620828	FGFR3	0.188881	TCTN2	-0.132964	TXNDC12	0.0275179	G3BP2	-0.486432	BC052592	0.281395
CIDECP	0.228	UROD	0.218	KIF21B	0.263705	HMOX1	0.490594	STAM2	-0.284249	GPM6B	-0.316253	LSAMP	-0.570446	IFT57	-0.275516	REEP2	-0.084067	ZNF559-ZNF177	-0.568507	HPX	2.14713	HIST1H3H	1.03	PPM1L	-0.800681	SPTLC2	0.374815			TIMMDC1	-0.101603	SOX6	0.630501	RTP1	-0.0856557	SRRT	-0.18698	CD1E	-0.0252767	GNG4	-0.680161	C9orf96	0.420389
STS	0.0902	NFAT5	-0.112	HIPK2	-0.225624	FAM71B	-0.263554	LOC284561	-0.84494	SLC8A1	0.18817	LOC729678	0.359643	HOXD4	0.141716	RFX5	-0.118907	ZNF177	-0.568507	CDKN1C	-2.20012	SASH1	0.608	C9orf64	-0.596244	FAM102B	-0.30176			GDI1	-0.0713665	TMEM183A	-0.80332	NXPH2	-0.18111	KLHL8	0.123614	CKAP4	0.0285535	MAPK9	-0.468831	BC036504	0.420389
MPLKIP	-0.218	CPLX2	-0.131	TMEM63B	0.173306	PRRG4	-0.472694	TMEM61	0.638199	NPTN	-0.222607	FECH	-1.07051	CCDC6	-0.256844	RHOT2	-0.0785651	HOXA10-HOXA9	1.11307	ACADL	-1.98825	CCDC23	1.39	PRR14L	-0.575141	XCR1	0.154769			IGSF1	0.0878249	KRT2	0.455591	AUTS2	0.100482	PSMD5-AS1	0.246964	PTPN9	0.0291505	BBS7	-0.405141	KRTAP5-6	-0.804804
ACADSB	0.139	TTTY5	0.135	FAM27C	-0.121304	LRRFIP1	-0.299191	ADAMTS2	-1.47668	AHI1	0.328842	FLRT3	0.750342	PRODH2	0.136955	SNUPN	-0.123639	MIR196B	1.11307	CARD14	-2.03126	SCCPDH	1	SYF2	-0.661933	MOB3B	-0.286676			FAM138D	0.0718572	POT1	-0.514494	CISD2	-0.108198	AQP4-AS1	0.13288	JUNB	0.0305508	SNORD108	-0.615218	AB126075	-0.804804
TMEM176B	0.473	TCEA1	-0.185	AJAP1	0.153065	CCDC134	-0.187079	CFAP161	-0.943135	KIAA1598	-0.391585	SERPINB3	-0.177352	POMP	-0.140614	ZNF90	0.161157	HOXA9	1.11307	CTDSPL	1.58106	DPEP3	0.553	CNOT4	0.358455	HAUS3	-0.190813			OR52B6	-0.0890842	CACNA2D3	-1.45793	SLC25A33	0.149974	PARD3	-0.238735	HLXB9	0.0313875	SOWAHB	-1.00061	LRRN1	0.417287
CD164	-0.214	ZNF23	-0.229	SSX1	0.141834	ZNF439	-0.21806	ZC3HAV1L	-1.13281	GRAMD1C	0.284235	KREMEN1	0.528809	ST5	0.206691	IFI6	-0.108922	LINC00921	-0.272155	DDC-AS1	-1.57596	SP140	-1.17	LOC114224	-0.901674	UBL7	-0.200072			ELP3	-0.0947265	MCF2L2	0.538595	MRPL9	-0.113618	KIAA1524	-0.286751	SLC17A2	-0.0591856	RFK	-0.706203	BC034947	0.417287
EVA1B	0.132	ALG5	-0.19	SDHAP1	-0.172495	RSPH10B	-0.159525	ANAPC13	-0.865941	MUM1	-0.506726	CCBL2	-0.99146	TRIM29	0.172329	DYNC1I1	-0.102942	ZNF263	-0.272155	P2RY13	-2.68624	FNDC3A	-1.17	PLA2G12A	-0.93678	FGFR1OP	-0.248671			MT1A	0.163413	PLEC	0.370797	SF3B1	-0.0835122	FEZF2	0.100015	SURF1	0.0296673	DLG3	-0.647713	GARS	0.25639
AGRP	0.0918	FES	0.439	FBXO7	0.53598	OR3A2	-0.176112	VSIG2	0.826269	CDT1	0.116717	PSAT1	-0.940145	ZC3H15	-0.315015	NANOGP1	0.12566	LOC101928269	-0.652075	MALL	-1.8171	SNTB1	-0.638	CCDC136	0.311997	RWDD4	-0.220789			ISCA1	-0.168443	ACVR1C	-0.537046	HCK	-0.142535	PRO2964	0.150079	PPP2R5C	0.0519264	RP11-13A1.1	-0.958784	7p15	0.25639
TBC1D31	-0.201	AARS2	-0.162	PTX4	0.137896	FUOM	0.254423	POLB	0.605831	NKTR	0.495538	RHOG	0.581233	AP4S1	-0.273915	LSM4	-0.0652982	LOC100506403	-0.652075	TRPM6	0.784164	LARP1B	0.794	DYRK2	-0.666486	COX20	-0.201548			LETMD1	-0.0824149	MAPK11	-0.712878	STOX2	0.0701734	ANKRD29	-0.189257	CFI	-0.0529737	NANOGP8	0.968214	U09587	0.25639
HSCB	-0.391	TMEM59	0.182	ISM1	0.184745	GSTP1	0.291856	ORAI3	0.358399	NDUFS6	-0.221303	CLEC16A	0.856332	NDUFAB1	-0.301389	TUBA8	-0.134453	RUNX1	-0.652075	LRRC36	1.55913	MYH10	1.21	FUT6	0.307602	ERCC4	-0.260655			SLC37A3	-0.154026	HEPACAM2	-0.447943	PZP	-0.0886515	MYO6	-0.141159	LIG4	0.0328065	MCM4	-0.311248	COQ3	0.248328
TREML3P	0.132	CAPS2	-0.125	ORMDL3	0.275251	RGCC	-0.610792	MUL1	-0.509556	CLEC14A	0.270056	CAMK2N1	0.366167	DDX11	0.151416	MRPL58	-0.0997313	MIR4738	0.360614	KITLG	1.41806	ARL4D	0.564	LOC101927274	0.330446	DCBLD2	0.25737			LAPTM5	-0.254386	PATZ1	0.429973	OR56A4	-0.110031	DEFB126	-0.165832	KCNAB2	-0.0605097	LRP11	-0.426648	AK056955	0.248328
THEG	-0.104	DYRK2	-0.308	IL18BP	-0.149699	ENO3	-0.216491	TAL1	0.637818	SEL1L	-0.479204	SLC25A13	0.417435	PWP1	-0.218015	GNL1	-0.0749857	H3F3B	0.360614	EML5	1.87476	THBS2	0.681	MNT	0.330028	SPINK7	0.135872			PRNP	-0.0848102	PARPBP	0.662481	SELPLG	-0.150498	CSNK1A1	-0.180182	PCDH12	-0.0276484	SLC2A4	0.536965	GADD45A	0.230205
CD7	-0.441	PSME2	0.538	CCNDBP1	0.31671	RUVBL1	-0.168459	LOC101929734	0.707817	TOP3A	0.167514	DEDD2	0.730444	TMEM59	-0.200829	SERGEF	-0.0950352	H3F3A	0.360614	COL12A1	0.890375	EGR1	0.551	DNAH7	0.416089	PTPRK	-0.509852			C8orf34	-0.309821	C11orf91	0.536611	KLKB1	0.186855	DLG1	-0.143057	FIGN	0.0222249	FPR1	1.12476	M60974	0.230205
GSTM4	0.112	MRPS31	-0.313	FOXJ1	0.13537	TNP1	-0.148633	LPAR1	-0.935104	RCC2	-0.518062	MEST	-0.901593	ARSF	0.156409	BST2	-0.144582	LOC101927137	-0.340308	MACF1	1.45543	SMYD4	-0.488	OLAH	0.413164	MUT	-0.233268			GPR137	-0.0611903	ARX	-0.418547	EPHX1	0.199088	SNTN	0.114806	CCDC28B	0.0279065	FLRT3	-0.622	APOM	0.256105
SLC16A12	-0.225	NEDD4	-0.127	USP9X	0.1592	CCBE1	-0.466797	NDUFA10	0.991364	SPAM1	0.107725	PTPRN	0.460656	AHCYL1	0.30868	PRDX5	-0.131784	ATP1A3	-0.340308	USP49	1.28483	MAPK4	0.695	CYP1B1-AS1	0.338673	SNX25	0.157161			ATP6V0B	-0.134726	ALS2CR12	-0.495882	RGS1	-0.460768	NCKAP5	-0.405658	EVC	0.0515231	AC145436.1	-0.887873	AF118393	0.256105
CXXC5	-0.355	CSF3	0.102	KLHDC9	0.146913	SSTR2	-0.429079	LOC339568	0.534318	GPX4	-0.291436	NID2	0.729379	ROBO3	0.202037	NDUFB2	-0.110439	ORM2	0.562949	MKX	-2.24612	HEATR3	-0.476	ST14	0.319873	ZNF605	-0.34369			ADCK1	-0.0767309	EFNA1	0.481388	STK33	0.193111	ARNT	0.116676	ADNP	0.0307737	KCNK9	-0.881424	BC020683	0.256105
CLEC12B	0.0935	CD247	-0.514	GGT7	0.138829	GAGE2A	-0.178565	TMEM62	-0.378274	LTV1	-0.478548	SYNRG	-0.311072	DIO3	0.195327	CECR1	-0.212028	ORM1	0.562949	SOX2	-1.39767	UGCG	0.652	MSI2	-0.438564	TIA1	-0.214671			ACLY	-0.0801541	MIR506	-0.413562	AURKAIP1	-0.0657968	DHRSX	0.182968	TRPC4AP	0.0704214	PRKAR1B	-0.900779	AF161454	0.256105
POLR1E	-0.287	GNAL	-0.121	ZNF573	-0.388779	SELK	-0.33033	ITPKB	0.79972	HOXB9	0.0890715	PDLIM5	0.40025	LINC00963	0.152644	SUMO3	-0.0935731	SNORA68	0.270049	PARVA	-1.19871	ITIH3	0.766	CREB3L2	-0.394003	DENND5B	-0.297842			RPN1	-0.0695555	PAGE5	0.331731	MIR100	0.141568	USH1C	0.151987	HDAC5	0.0179681	PIN1	-0.589312	ADO	0.235577
ANGEL2	-0.229	UBAC1	0.246	TMEM70	-0.202127	LIFR	-0.147483	SAP30L	-0.739496	PRPF4	0.241946	ARHGAP32	0.550373	MYBL2	0.1799	TRIM21	-0.14632	RPL18A	0.270049	SIX5	2.01435	ACSS2	0.482	PCDH7	0.326729	SF3A1	-0.102398			GIMAP2	-0.103048	KNDC1	-0.618485	PRDX3	-0.10702	CC2D1A	-0.140625	EIF3S4	0.0424291	TMX4	-0.45115	BC028589	0.235577
DLG3	0.111	ZNF70	0.119	KLK11	0.143854	ADD3	-0.321891	TNPO1	0.566829	OR13D1	0.156112	HIST1H2BI	0.193533	ARPC5	-0.199652	PLA2G4A	-0.198911	MIR6831	-0.341251	LINC00518	1.97987	SUN1	-0.48	HPX	0.331898	CDK9	-0.361975			MS4A6A	-0.17601	C1orf87	0.641085	GEMIN4	0.0790107	LINC00967	-0.102426	TIPARP	0.0721162	GLS2	-0.818967	ARF6	0.196677
NOP56	0.195	DPH7	0.148	UBE2D2	-0.331541	PCYT1A	0.145302	LINC00354	-0.52698	CAMKV	-0.332685	SNAPC5	0.397704	TRPM4	0.198541	KPNA7	0.105583	APBB3	-0.341251	LINC00608	-0.941011	ISCA1	1.1	HNRNPA3	-0.497138	FANCD2	-0.282137			DCPS	-0.125867	PLIN5	-0.698553	TRMT112	-0.107764	PYM1	-0.100938	DNAJB7	-0.0378333	SMPDL3B	-1.02303	BC008918	0.196677
RGS1	0.756	PRR23D1	0.151	GMPR2	0.203351	TAF1	-0.176849	ICE2	-0.836949	PIGS	-0.403517	CD300E	-0.208314	LYRM2	-0.280067	SNAPC5	-0.0944301	NPIPA5	1.17447	IRF6	1.6455	ARHGEF7	0.701	HHIPL2	0.361005	SFXN1	-0.376563			C16orf62	-0.0975651	LOC102724479	-0.714765	TOMM22	-0.222369	DAB1-AS1	0.181123	EIF2C3	0.034405	LGALS8	-0.348223	HRASLS2	-0.353098
PIAS2	0.101	RSRP1	-0.361	ZSCAN31	-0.135414	C10orf76	0.165585	COPE	0.516392	SNTB2	-0.348733	ZNF652	0.796196	RIN1	0.222498	CNOT4	0.0767409	NPIPB5	1.17447	CASP5	-0.869073	RAD51C	1.47	TMEM161B	-0.524331	BTBD11	-0.313748			IDH3B	-0.117869	FRMD3	0.865904	EPN1	0.0951959	CCDC189	-0.146865	ARF6	0.0498672	ANKRD50	-0.357841	AB453251	-0.353098
CD320	0.214	ZBTB44	-0.239	TCF23	-0.143642	RPL18A	0.220249	PMCHL2	-0.732112	CCDC33	0.105443	ILDR2	-1.22667	UBE2K	-0.348301	TFAP2B	-0.211577	LOC613037	1.17447	C9orf3	-1.43259	MALT1	-0.76	MRAP	0.287454	CFAP97	-0.27279			TAPT1	-0.0993754	METTL10	-0.571979	ANAPC11	-0.055756	SORD	0.231079	WDR40B	-0.0999801	OMD	1.12814	CD209	-0.362865
TTC8	-0.164	GPR162	0.358	RNU4-1	0.388465	RPL26L1	0.181821	LRRC43	0.7171	HRH4	0.0859033	PHTF2	0.722649	SEPT15	-0.270585	CYP26B1	-0.239438	NPIPB4	1.17447	BRWD1	-0.725909	CCNB1IP1	0.589	PCED1B-AS1	-0.433821	AQP4	0.160635			PTPRM	-0.145197	SUCNR1	-0.429643	DUSP27	-0.0723915	UBE2H	0.191719	TACSTD1	0.0540595	THEMIS	-0.968222	19p13	-0.362865
COL14A1	0.143	TCF20	-0.264	XKR7	0.107709	OR4M1	0.157474	EZH1	0.273472	CYP4F8	0.193839	RHOQ	0.855175	CDC42	-0.416368	PRSS3	-0.137519	NPIPB3	1.17447	PTCH1	1.04662	TGIF2	-1.25	COL6A1	0.315746	ARHGEF18	-0.129805			R3HDM2	-0.0935632	PAICS	-0.505401	PLD4	-0.106276	CNIH3	0.144342	XCL2	-0.0258931	MAPK1	-0.454553	AK293089	-0.362865
S100A4	0.3	FAM199X	-0.156	UBE2V2	0.163494	OMA1	-0.192197	YIPF6	0.267826	DRGX	0.112446	NRP2	-1.96456	ALDH4A1	0.18943	CDK10	-0.121209	MEF2B	-0.41487	LINC00970	2.809	HTRA4	-0.977	AKAP10	-0.745043	ZFAND3	0.24974			SLC6A11	0.20841	SLF2	0.424518	UCP2	-0.126529	SYCP2	-0.168239	RDH11	0.0350538	PJA1	-0.440937	ACTL7B	-0.516992
CHD6	-0.265	RAX2	-0.449	NHLRC2	-0.193079	TRHDE	0.188176	ATXN7L3	-0.284533	HJURP	0.121179	SLC19A2	0.987782	SOX11	0.116655	CAMTA2	-0.0966672	BORCS8	-0.41487	EOMES	-0.988503	RCAN3	0.493	C15orf57	-1.01659	FBXO3	-0.235844			MIR181A1	0.193898	VAPB	0.82562	SYTL3	-0.119651	ZNF91	-0.142459	UBXD4	0.0262287	linc-COL18A1-4	-0.71753	9q31	-0.516992
UBAP1	0.244	PTGIS	-0.15	MSH4	-0.116649	EOMES	-0.332511	PIK3C2A	0.489291	COL6A2	0.118086	TFAP4	-0.32178	FHL2	-0.226871	MIR495	0.266137	BORCS8-MEF2B	-0.41487	HEMK1	1.75392	TCEB2	0.833	TARDBP	-0.543986	ADNP2	-0.184818			BDNF	-0.350056	AADAC	0.634363	ZDHHC5	-0.0878293	TAB3	0.107245	SH3BGRL2	0.0241345	NGRN	-0.638443	AK097670	-0.516992
TALDO1	0.226	CDH7	0.149	SKAP2	-0.231102	SEPT7	0.155101	ARHGAP30	-0.379476	C2orf68	0.124279	TRIO	0.825523	METTL5	-0.226692	NICN1	-0.118413	C2orf27B	-0.233827	ZFPM1	-2.28929	C6orf192	0.929	PRKAA1	-0.74605	IL36G	0.171764			PPP1R11	-0.0704168	LYZ	0.39097	FOXK1	0.0728739	LOC388692	-0.143879	RPS27	0.0310103	AC083863.7	0.734487	GALNT12	0.210073
C6orf99	0.101	LIPJ	-0.149	PLEKHG5	0.150603	CECR5-AS1	0.179195	TLK1	1.04431	TTC23L	0.147673	RNPC3	-0.911355	NUP98	0.13906	ACD	-0.0961627	C2orf27A	-0.233827	DLEU7	-1.99211	ZNF585A	-0.499	GOLGA2	-0.439533	LINC00959	-0.319464			DDX1	-0.14612	FAM9C	-0.400273	TTC28	0.0936165	TUBA1B	-0.100125	TRDN	-0.0338906	FLI1-AS1	0.725518	AB040673	0.210073
C2orf57	0.123	SCGB1C1	0.27	NOXO1	-0.121371	HDLBP	-0.174392	GRIK4	0.951435	ANO2	0.0895476	RAB26	0.433098	IGHMBP2	0.165757	C5orf38	0.096107	IGK	0.748306	RGS1	-2.8673	ERAP2	-0.993	PRAMEF12	0.338808	FAM46C	-0.261539			KCNAB1	-0.162695	PIKFYVE	0.533895	GNA12	0.152705	LINGO1-AS2	0.0953804	PARP8	0.0360923	KIAA0513	-0.909122	MSRB3	0.234843
RASA1	-0.193	MAPRE1	0.203	GPR50	-0.153561	C19orf12	0.200204	LAMB1	-1.00385	ADAMTS16	0.153461	UCN2	-0.254887	DDX28	0.152476	CLIC2	-0.193569	IGKC	0.748306	BARX1-AS1	-0.930533	PITRM1	-0.434	CMTM5	-0.996175	TDRKH	-0.195933			PPIA	-0.098077	ZFX	-0.688442	TNFSF10	-0.277248	HPGDS	0.177728	COX15	0.0202247	KLHL11	-0.356372	BC040053	0.234843
HTATIP2	0.234	C18orf25	-0.242	SMIM7	0.215679	CDR2L	0.163036	SLC4A8	0.477848	FBXO32	-0.303979	EMD	0.418042	RTEL1	0.176319	ISCA1	-0.137347	LOC101928634	-0.555716	PIK3C2A	1.31498	GALK2	-0.924	ZNF598	0.356096	RBM12	-0.217056			NUDT16	0.0584494	SPAG6	0.423884	GABRG1	0.293419	ST18	-0.128699	SPPL2A	0.0425829	GPR155	-0.447583	KAZ	0.232353
IQCE	0.0782	G6PC3	0.223	NUP155	-0.188653	MARCH1	0.261214	STAG2	0.421605	E2F8	0.076886	FBLN7	-0.934118	RBM39	-0.230349	SRP9	-0.0946394	SNORA67	-0.555716	AP4E1	-0.980017	HIST1H2BG	0.843	RERG	0.217018	ZNF343	-0.200171			SAMM50	-0.077984	ASZ1	-0.346766	CD14	-0.217178	TRIM78P	-0.138424	ALG1	0.02621	RP11-1006G14.4	-0.416086	kazrin	0.232353
CRYBA2	-0.121	ZNF773	-0.509	ESRRG	-0.111497	CRYBA1	-0.190522	SRRM2-AS1	0.672803	LCK	0.0950904	ANK2	-0.393993	LANCL1	-0.246855	RTFDC1	-0.0755224	CD68	-0.555716	SPAG16	-1.53614	CTSB	0.56	EGF	-1.08824	MTHFD2L	-0.388544			CYP1B1	-0.244652	AMELY	0.511185	UBAP2	0.0632619	ZNF750	0.189663	HIST1H2BK	-0.0317165	SYNGR1	-0.831183	AB028949	0.232353
SLF2	-0.166	CC2D1B	-0.195	PAM16	0.215495	PNKD	0.260751	ANGPTL1	-2.08481	MYO1C	0.172424	HCN3	0.470988	CUX1	0.128799	TSPAN16	0.0999392	HERC2P9	-0.37226	GPIHBP1	1.85763	DMD	0.768	SOX10	0.344573	MBP	0.35976			MFN2	-0.0600623	TRIM3	0.392972	SNORD15A	-0.0909141	CCNC	-0.129017	RNPEP	0.0386502	EGR4	-1.2591	AK126562	0.232353
E2F4	0.219	OR8U9	0.105	MAP3K14-AS1	-0.13539	ZNF436	0.146386	TTC16	0.685	C22orf29	-0.768527	PCDHB3	1.08886	DPY19L2P2	-0.393616	KRTCAP2	-0.108879	HERC2P2	-0.37226	TNPO1	1.05463	KLHL7	0.58	CTAGE5	-0.888944	WDR54	-0.248674			CNR1	-0.261294	HIST1H1D	0.443061	FES	-0.0708856	LINC01021	-0.167476	SOSTDC1	-0.0481351	SNORD114-21	-1.17333	LOC100129042	0.232353
PLXDC2	-0.204	STRIP1	0.163	CMAS	0.165485	CDC26	-0.212626	C3orf70	-0.649662	ABCA3	-0.444477	C22orf39	-0.799904	SUPT7L	-0.207892	SLC4A3	-0.0915555			NMNAT2	-1.15969	ZNF133	-1.05	FRS2	0.333481	KRCC1	0.267234			GIMAP4	-0.13627	MIR924	0.439793	DFFA	-0.071087	GRAMD1C	0.16101	VGLL1	-0.0330322	PI4K2A	-0.473458	AK126906	0.232353
RIOK3	0.444	FCGR3B	0.223	CXXC5	-0.389102	TST	0.38906	DBT	0.764165	GLYCTK	0.11749	HEPN1	-1.01457	SNRK	-0.234477	NDUFS6	-0.0633244			CIRBP-AS1	-2.05151	CUBN	-1.15	ZNF341	0.446175	SPAG16	-0.314494			CCDC8	0.0654229	DEPTOR	-3.09354	SLC37A3	-0.109988	IL36A	-0.166954	TBX5	0.0400837	SLC9B2	-0.511298	LOC100132942	0.232353
BBOF1	0.202	C14orf169	-0.22	ANKHD1	0.212245	RASGRP1	-0.377134	KCNJ15	0.343375	PEX14	-0.23898	PGAM1	-0.642131	RXRA	0.165518	AKIP1	-0.100502			FKBP3	1.12641	SLC28A1	0.89	LTBR	0.352318	WFDC11	0.146689			PHKG2	-0.088797	SYT2	0.584476	DDX56	-0.0803585	LOC100505515	-0.150807	SMPDL3A	0.0340774	RP11-429J17.7	-0.93218	NEUROD1	-0.353021
ADPRHL2	0.163	DNAJC28	-0.2	ZNF146	-0.119847	BEST3	-0.197364	TMEM259	0.21351	FLT3LG	0.131037	RAB14	0.671946	MNX1	0.135679	GOT2	-0.0937245			DAO	-0.838798	FIBP	0.55	MTNR1B	0.301313	FAM30A	-0.204439			TKTL2	0.071583	FLJ41130	0.619362	BCR	0.112086	LRRC1	-0.416273	POGZ	0.0520675	NSF	-0.809696	2q32	-0.353021
KLHL5	0.224	TRIM9	-0.165	RCVRN	-0.174282	HDAC2	-0.19444	NMUR1	0.525788	C9orf53	0.0910013	EIF3G	0.643767	DHX15	-0.275163	GPM6A	-0.108422			GADL1	2.13097	RQCD1	0.63	NFATC2IP	-0.458727	MCHR2-AS1	0.176862			PSAP	-0.0551545	OR1J1	-0.464231	MAN1A1	-0.213018	VWA3B	-0.130742	FLRT2	0.0212424	KCNG2	-1.59369	D82347	-0.353021
PRUNE1	0.203	TFAMP1	-0.111	CLTA	-0.142256	ILDR2	0.174618	PPA2	0.616016	RASGRP2	-0.293182	C11orf74	-0.416584	LRPPRC	-0.250747	GRN	-0.0926446			LOC729324	-1.19043	IQCK	0.926	VWA1	0.360878	DNAJB9	-0.233844			LGI2	-0.225971	CCNJL	-0.647556	AKAP10	-0.101529	SLC7A10	-0.129088	C10orf97	0.0207954	NANS	-0.404243	HIST1H4D	0.539541
SLC9A9	0.182	P3H1	0.186	SLCO3A1	0.168317	PCF11	-0.227591	EMC1	0.236954	POLR1E	-0.401614	SLC9A11	0.256981	RAB40B	-0.23559	SLC6A17	-0.171626			ALDH3B2	-3.12373	PPP2R3C	-1.3	DOCK1	0.337272	RCAN3	-0.329077			ARSB	-0.0776955	TSPAN15	-0.54338	SNAPC5	-0.121724	PAPOLG	0.0828898	MS4A5	-0.0403847	TCP11L1	-0.276684	BC128104	0.539541
MRGBP	-0.287	PAX8	-0.131	ZCCHC6	-0.308091	THYN1	-0.358689	THEG5	0.481426	LLGL2	0.148102	SLC2A10	-0.171577	FAM49A	-0.282734	GRK5	-0.219803			ZC3H3	1.28605	ARMCX4	-0.725	FAM71B	0.334477	UBE2V2	-0.209639			SLC25A4	-0.1523	CAPS	1.10419	RNVU1-6	-0.154911	DIAPH3-AS1	-0.128782	C8orf78	-0.0391208	C16orf45	-0.568809	TMEM104	-0.248338
NOP2	0.103	PXDNL	0.155	LOXHD1	0.152238	DNMT3B	0.193849	LINC00312	0.682189	RPL41	-0.246139	VPS28	0.892313	YWHAB	-0.181811	SNORD115-37	-0.157803			PSMG4	-1.41169	OXTR	0.863	PCSK7	-0.807218	MRPL20	-0.187351			HINT1	-0.0856384	RTCA	0.505038	THAP1	-0.0793223	CTLA4	0.102301	GRB10	0.0319909	LRRC47	-0.335562	BC037278	-0.248338
DDX17	-0.347	DHX33	-0.162	ZNF160	-0.399813	EQTN	0.156014	BTG3	0.426257	KIF24	0.0879027	WNK1	1.10652	IPO5	-0.352545	MCF2L	-0.122959			SLC48A1	-0.73785	ZNF510	-0.97	CAPN1	-0.521004	CFL2	-0.282308			NDUFB11	-0.0572838	LAMTOR5	-0.443756	SCPEP1	0.0906321	MTOR	0.115715	SEMA4F	0.0556712	NELL1	-0.598914	HIST1H4E	0.388569
VPS28	0.209	GOLGA5	0.24	ZMYM4	-0.180761	ERLIN2	0.218112	LARP6	0.600494	CNN1	-0.301297	COX16	1.27252	TOMM70	-0.261805	DDX23	-0.0872401			PSD3	1.65423	PHB	0.561	MOB3A	0.442127	LOC102723694	-0.206686			GSS	-0.0656076	SNORD50A	0.406956	MAN1C1	-0.0858861	LOC101927416	-0.110227	PTD008	0.0284789	PPP3CB	-0.586174	CR542180	0.388569
FYB	0.206	CD33	0.383	MCOLN2	0.510824	CC2D1B	-0.284641	LETMD1	0.439972	LOC441493	0.0803199	USP15	0.301988	KRT16	0.173912	ADGRG6	-0.162385			SNTB1	-0.969292	KIAA1632	-1.25	GMIP	0.585509	TECPR1	-0.135311			SPAG7	-0.0695318	KCNU1	0.474398	LIFR	0.207717	SRRM4	0.144482	PRKCQ	0.0390761	SNORA33	0.596887	BC090876	-0.352973
KIAA2026	-0.117	NBPF11	-0.2	DDX11	0.114883	ITPK1-AS1	-0.383022	ZNF701	-0.833785	TFF1	0.101493	SDCCAG1	-0.533591	C1orf54	0.205067	PGM5	-0.233292			TPM4	-0.893731	HTRA2	0.642	TRIM13	-0.966967	SOBP	0.220451			ATP5G1	-0.077126	ZNF704	-1.19785	METTL7A	0.309405	TMEM213	-0.118233	KIAA2013	0.0363878	SDPR	0.795793	MLL	-0.352973
PFKP	0.251	GK	0.202	TPTE2P6	0.133835	PRB4	-0.208195	FGFR2	0.682832	CEACAM3	0.116802	VPS37D	0.307998	RPS18	0.143314	MIR30E	0.226571			THNSL2	-1.42505	RBL2	-0.994	PROM2	0.442084	TRABD2A	-0.329222			PPP2R3A	0.150203	AAK1	0.856302	CHMP2A	-0.0508781	SH3TC2	0.124883	ABCF1	0.0337467	SGTB	-0.599416	UBE2M	0.268733
RNU4-1	0.317	CR1	-0.127	CENPV	0.158701	OAS3	-0.178703	TTC37	0.318126	MFSD4	-0.324597	FTSJD1	0.603276	PLXND1	0.16309	ZC3HC1	-0.10614			SEZ6L	1.89867	CBR1	0.667	HNRNPA2B1	-0.524096	PARP11	-0.231502			RGS20	0.106959	ZNF587	-0.497395	ABCC10	-0.0692205	ERGIC2	0.111606	C14orf139	-0.0474287	TTC39B	-0.484807	UBE2MP1	0.268733
GPSM1	-0.0948	NEDD9	0.131	NCKAP5L	-0.190729	SNX2	0.19575	SMOC2	-1.32551	CEP70	-0.598754	PLCB1	0.23613	FBXW2	-0.228008	PMS2P3	0.0890546			TSPAN32	-1.82564	CRYGB	0.561	CLYBL-AS2	0.291244	GJA8	0.191895			RIBC2	0.0954885	POLM	0.551179	GPR156	0.105214	RGR	-0.173508	HLA-DOB	-0.0321834	RP11-660L16.2	0.943259	BC058924	0.268733
PRDM16	0.118	SNORA80A	0.196	SPATA24	-0.16094	NEK3	-0.13746	SDK2	0.733011	PAPSS2	0.286444	SRGAP3	0.380421	MARCKS	-0.332722	IFIT2	-0.216434			LOC101927943	-1.90468	SEMA6B	-0.565	RNF167	0.447859	DYRK1A	-0.103652			KLHL42	-0.0699034	ZNF292	-0.453527	PTPRC	-0.248582	C11orf49	0.121852	MTHFR	-0.0443699	XKR7	-0.873404	MLH3	0.219903
IRF9	0.337	GPSM1	-0.121	CHKB	0.335752	ARL16	-0.276048	NAA30	0.630608	FXYD5	0.0978183	RPS25	0.429095	EGR3	-0.32097	PQBP1	-0.0785074			TK2	-1.439	PRICKLE4	0.801	GJC1	0.3342	TAS2R8	0.122392			MYLIP	-0.0860253	ZNF442	1.1146	HIF3A	0.151163	PIEZO1	-0.0960385	KIAA0907	0.0388189	SNORD114-27	-1.00563	AF195657	0.219903
RNU6ATAC	0.114	SDHAP1	-0.137	GHRH	0.103363	CD163	-0.252522	NAALAD2	0.697714	TTC14	0.545623	PDZD4	-0.369997	MAP2K1	-0.36592	DCPS	-0.109959			CYP2A7P1	1.06626	SDPR	1.07	SOS1	-0.920269	MPHOSPH8	-0.165953			COX15	-0.103325	AKAP11	0.589359	GBE1	-0.133492	UCP1	0.116681	C9orf23	0.0230756	CD244	-0.900491	ZNHIT1	0.229774
GPS1	0.139	PIP5K1B	0.128	SELM	0.367613	MIR449A	0.178324	C3orf49	-0.301385	POT1	0.454283	L2HGDH	1.15153	COX6A2	0.18836	KRT18P55	0.0894942			ACSM5	-0.821987	CTTN	0.784	PDE6A	0.393884	PHF10	-0.276075			SPON1	0.202266	SCARNA8	-0.430956	HIST2H2AC	0.156626	DMXL2	0.124296	TBC1D1	0.0272009	KIAA1609	-0.325319	AK092478	0.229774
CENPI	0.127	TTC8	-0.208	GPANK1	0.148382	CLDN5	0.368491	NAT8L	-0.333708	CXorf40A	0.4184	VPS53	1.02975	SULT2B1	0.186258	TMC7	-0.181623			CALML4	-0.833577	ZNF562	0.74	ABHD17B	0.317773	NEK10	0.208271			PRPS1	-0.163148	MIR204	-0.554394	ETV5	-0.17841	CABP7	-0.110666	SLCO5A1	0.0306444	C9orf16	-0.563171	HIST3H3	0.468367
RNPC3	-0.127	PGRMC1	0.474	ZNF225	0.166141	KRT1	-0.627428	TNFAIP6	-1.39023	FAM124A	-0.161916	PCID2	0.584383	BORCS6	0.160634	LIAS	-0.116333			CEACAM1	-1.77864	NCAPG	1.53	RPH3AL	0.255442	HAUS6	-0.323852			CLEC9A	-0.136556	PLGLA	0.442615	FAM107A	0.20123	NUDT12	0.15531	CHEK2	0.0335718	MTCH1	-0.391265	1q42	0.468367
CABP2	-0.112	KIAA1257	-0.137	BIRC3	-0.35647	ARPC4	0.195821	KLHL10	0.835426	LOC642864	0.0857648	YPEL2	1.21894	GPSM3	0.164065	GALNT18	-0.114073			CHD7	0.770664	MAGED2	0.541	GCNT7	-0.596179	THEMIS	-0.391194			SAMD8	0.054563	MUC6	0.685863	OR7E13P	0.182016	CCNDBP1	0.0991254	FAM46C	0.0343653	MYD88	0.539763	BC101837	0.468367
SRSF2	0.186	UHMK1	-0.209	PPIH	0.241881	BRSK2	0.176883	SLC23A3	0.651765	RASGRF1	-0.279109	RBM4	-1.13662	TNFSF13	0.310518	RCBTB2	-0.176163			CFAP157	-2.17394	RBPMS2	0.502	TFB1M	0.352536	LOC158402	-0.515291			LAMTOR4	-0.0973251	MRFAP1L1	-0.709662	GPC4	0.124983	PPP2R5C	0.128715	PDCD1LG2	-0.047304	ANKRD1	0.734792	S1PR5	0.385648
SNORD31	0.353	APBB3	0.434	ZNF76	0.21812	CCND2	-0.220017	LOC105378749	0.375961	NCRNA00168	0.125631	POLDIP2	-0.980514	AMT	0.149339	PANK4	-0.0981628			BTG3	0.825243	PLEK2	1.23	SMIM4	0.302267	LPCAT3	-0.188481			COX7A2	-0.111932	GBP3	-1.03502	COPB2	-0.0996703	LINC00642	0.171778	LPO	-0.0351566	linc-PCTP	-1.23466	BC067781	0.385648
ZFAND5	0.268	SMARCE1	-0.273	MEI1	0.145147	CWC22	-0.210619	OSBPL1A	-0.385966	CASP4	0.110869	KRTAP5-2	-0.483319	NCLN	0.155262	UROS	-0.0950392			KLC4	-2.35963	PBX3	-1.12	MRPL30	-0.318367	FAM175B	-0.148458			BRMS1L	-0.157475	TMEM178B	-0.434095	CDK2	0.127659	KDM8	-0.113923	ZMYND19	0.0306044	EPHA7	-0.701176	CST4	-0.582641
SNORA41	0.16	PSPC1	-0.183	ADCY3	-0.34305	PDCL2	-0.165876	SATB1	-0.595355	SCARA5	0.112734	BEST1	0.472384	S100A14	0.142679	ACAP3	-0.125629			TRIM66	0.711382	FERMT3	0.454	GRAMD1A	-0.792119	LINC01620	0.129718			PDE4B	-0.134018	PLEKHG1	-0.724907	BCORL1	0.0809221	MMP9	-0.0998539	ISYNA1	0.0406553	RP11-359D14.2	-0.918382	CST1	-0.582641
PLEKHM2	0.215	BLVRA	0.371	FAM102A	-0.152282	SNX5	0.230902	TSC22D4	0.576342	MXRA7	-0.566858	RNF123	-0.894185	SLC26A10	0.192109	FAM3C	-0.119121			IQCE	0.911688	CCDC85C	0.487	NCR2	0.337736	LARS2	-0.261751			SMIM14	-0.142886	TMPRSS15	-0.477463	SCG2	-0.236667	LOC102723479	0.266123	ZNF281	0.0465995	OSTN	-0.895446	BC065714	-0.582641
SNX29P2	-0.248	PTER	0.116	LAMB3	0.111989	CD2BP2	0.206058	RPGR	0.324668	RNF181	-0.432397	AKAP9	-0.471303	RECQL4	0.217771	CCDC57	-0.0561333			CHRND	-2.07001	CELA3A	0.681	UNK	-0.355699	THAP6	0.158628			SLC14A1	0.438422	TEX40	-0.655327	CHEK1	0.13293	FOXD3-AS1	0.116045	LW-1	-0.0266689	RP11-145F16.2	-0.599728	BC021225	-0.582641
RFTN1	-0.312	GRIA1	-0.1	CAP2	0.163604	INTS7	-0.204565	LINC00537	0.604491	SLFNL1	0.141594	APPL2	-1.04408	TSHZ2	0.151614	MUM1	-0.102627			TEAD2	0.964443	RGS9	0.699	ARHGAP1	-0.385877	TNS4	0.213812			VASH1	-0.0864147	GPR35	0.563454	ROBO3	0.0868379	CACNA1I	0.113077	MICB	0.0310867	RP11-317P15.4	0.842465	ANKRD42	0.450726
CRELD1	-0.103	BMP8B	-0.643	IVL	-0.118584	ABCF1	-0.222783	ZNF214	0.758514	ELF2	0.401963	NDUFB1	0.296757	KCNB1	-0.285918	MT1E	0.306783			RBP1	-1.60449	TAS1R2	0.477	DESI2	-0.653183	TMEM209	-0.318643			SYNDIG1	-0.144026	MAST1	-0.544496	ZNF663P	0.0859552	PHTF2	-0.162686	OXA1L	0.0242765	PLEKHG1	0.504367	EF041819	0.450726
KIF21B	0.0953	LGALS3BP	0.261	SNORD103A	0.134004	LOC729451	0.219369	SGPP2	0.862226	ZNF598	0.165831	SLC35A2	0.540446	SERBP1	-0.193742	FAM13A	-0.104564			NBPF4	-2.64466	STMN1	0.893	ST8SIA3	0.320482	ZNF234	-0.232565			ITGB1BP1	-0.122922	CAPN10	-0.398091	U2AF1L4	-0.0985345	UGT2A3	-0.146347	LHFPL2	0.0907069	RPLP1	0.70035	OR10G4	-0.251411
CNOT11	-0.284	FMR1-AS1	0.154	FAM161B	0.155654	FUZ	-0.198989	IGF1	-0.546823	SNX17	-0.438878	CDC27	-0.73604	NSUN5P1	0.160364	MINOS1	-0.0937519			LOC728024	2.62769	CETN3	0.681	SSH3	0.252633	MMP2	0.166562			HCRTR2	-0.0911603	NF2	-0.464942	MARS	-0.0914616	REXO2	0.0910183	DC-UbP	0.0299665	PCYOX1	-0.314483	OR10G7	-0.251411
SULT6B1	0.095	C10orf53	0.16	SLC25A37	0.895669	ADO	-0.250836	DHX57	0.648016	C21orf33	-0.326965	OLA1	-0.230001	TNFSF10	-0.336143	NIM1K	0.124506			C8orf46	-2.91863	C6orf118	-0.523	RNF135	0.529574	MLLT10	-0.217269			COMMD10	-0.137901	N4BP2L2	0.605633	DAG1	0.0800764	LINC00663	0.109168	ZNF688	0.0307234	NPY2R	-0.855382	OR10G8	-0.251411
MIR217	0.117	FBXO38	-0.346	GPR146	0.19125	AGAP11	0.194964	MAPK1IP1L	0.26903	HAPLN2	0.142339	Septin 3	-0.543423	RPL29	0.205094	FAM169A	-0.111522			LINC01146	-1.12399	ITGAM	1	TMED5	0.421082	ACBD3	-0.153465			GPN1	-0.121033	ARHGEF28	-0.386692	BMPR1B	0.226462	LOC100506999	0.134645	GPD2	-0.0499941	RPGR	0.373911	OR10G9	-0.251411
ALDOA	0.127	ZNF41	0.106	KRTAP10-7	0.130486	H3F3A	0.215541	ZBTB38	0.444751	ITCH	-0.543768	WASH2P	-0.643858	IMPA2	0.19065	NAB2	-0.139076			SYT1	-2.25491	NR1H3	0.89	TSGA10IP	0.313572	CCDC117	-0.269377			GNB1	-0.0644892	VPS13D	0.501536	ARF6	-0.0911531	GATA4	-0.10693	C1orf105	-0.0370824	MAP1LC3A	-0.569201	BC136917	-0.251411
HIST2H2AA3	0.336	DCAKD	-0.233	FAM210B	0.630897	HCN4	0.152766	BMP1	0.506931	ASPN	0.171804	THAP2	0.702241	KLK1	0.164706	ARHGAP22	-0.132547			GRK4	1.28172	ZNF189	-0.83	CXCL2	0.238806	RPN1	-0.266644			SLC2A14	-0.105594	NMRK2	0.505165	TMEM126A	-0.177404	ZAK	0.204303	C16orf61	0.0441668	TMIE	-0.482544	ALG10	0.339243
SBK1	-0.271	SNX29P2	-0.554	TRPM3	-0.136744	KLRF1	-0.509963	CFAP69	0.487178	PLEKHA6	-0.468439	HDAC9	1.05541	ETS2	-0.302866	DNAJC4	-0.0971137			NAALAD2	3.55305	ZNF587	-0.565	STXBP3	-0.739513	FAM213B	-0.266867			M6PR	-0.0874701	ARSD	0.55874	TSPAN6	0.117149	FNIP2	0.215693	C9orf82	0.0338588	MPPED1	-0.84011	ALG10B	0.339243
PPP1R1A	-0.103	CHRM4	0.127	CSAG1	0.159218	PPM1K	-0.4152	PDCD2	0.263077	CASP7	0.155451	SYNGR3	0.610344	CCT5	-0.178068	P2RY10	0.100917			DNMT3L	-1.52732	MND1	1.59	EIF4G2	0.388743	SH3BP2	-0.167525			HMG20B	0.079503	SLC6A6	-0.856788	IQCE	0.0845609	NUDT14	0.1083	RUNX3	-0.0208363	ASPHD2	-0.655634	12q12	0.339243
PAXBP1	-0.237	MACF1	-0.302	MED19	0.151514	WDR66	-0.258313	CARMIL2	0.670651	PLEKHM2	0.209815	JUNB	-0.30912	KIAA1654	0.157985	YIPF6	-0.0809411			SYCN	-1.90982	ZNF614	1.05	GRK2	0.251782	PRR3	-0.240788			NDUFS7	-0.0730939	MIR609	-0.500927	AK4	0.16882	AGO1	0.125063	SLC2A10	-0.0343009	CLPB	-0.328254	BC137413	0.339243
CYB561	0.184	CDC42EP1	0.129	PI4K2A	-0.11766	LOC401127	0.19578	NFAT5	1.04048	MRPL9	-0.212243	INO80D	0.733312	PPIP5K2	-0.208832	APBB1	-0.101781			PCSK5	-2.21098	SLC20A1	-1.25	WIPF1	0.354152	DUSP15	0.188733			ATG7	-0.0857817	LINC00623	0.398967	MTMR11	0.0813179	KIF5A	0.122531	LSM2	0.0298156	CREG2	-1.00991	AK292488	0.339243
CPED1	-0.109	SNORD114-8	0.157	LRP10	0.394904	POM121C	-0.286107	FPR2	0.46928	NSF	-0.1906	GINS4	-0.196094	APOO	-0.23924	RPUSD3	-0.123055			SOX1	2.10261	SYT9	0.593	SMIM7	-0.476004	RMND5A	-0.232897			WDR74	-0.0814672	GAS7	-0.438501	FRG1BP	-0.1973	CXorf36	0.114569	ST8SIA4	0.0452644	NRG1	-0.626227	ENPP3	-0.376097
IFT27	0.118	PDE4DIP	-0.11	UBE2I	0.131228	NAXE	0.200687	PARP10	0.505237	ZZZ3	0.791571	SLC17A1	-0.183549	BGN	0.206629	RNASE6	-0.191844			TCEANC	1.34414	UNC119	0.454	N4BP2	-0.808055	EVA1B	-0.18714			PDLIM5	0.143824	PPP6R2	-0.444661	RPN2	-0.0754587	C1orf228	0.126524	EP300	0.0290561	ZDHHC23	-0.886367	6q22	-0.376097
SMAD5	-0.235	LOC101927845	-0.179	SLC9A7	-0.316819	CNIH4	0.21543	OSBPL3	0.358716	SLC15A1	0.100116	NAAA	-0.171588	TMEM80	0.156646	PRKACB	-0.148838			SLC17A2	2.63241	ASPH	0.686	TRIM58	-1.03837	ZNF747	-0.248897			STMN1	0.100657	ROBO4	0.57877	GAN	0.0843318	CDC20B	0.115003	MGC20255	0.0387221	NMT1	-0.323929	AK292903	-0.376097
LINC01567	-0.377	KDELR3	-0.102	SNX29P2	-0.322623	FBXL14	-0.189751	ZNF460	0.49978	LOC100128108	0.157005	LYSMD2	0.964324	SERPINF2	0.172748	CCNDBP1	-0.102176			DCAF4L1	2.12199	C14orf118	-0.97	LOC255654	0.315878	JMY	-0.313437			CHST1	0.158144	SNORD97	0.556011	ARHGAP5	0.095543	RPL7	0.164301	AGTR2	-0.0989177	SV2A	-0.731492	C3orf52	-0.298693
LAMA3	-0.115	LOC100128905	0.147	FH	-0.303033	CUX1	0.258797	DLG3	-0.257751	MYLIP	-0.379752	PAPPA	-1.30651	SYT11	-0.254807	RAB27B	-0.139055			HSPB7	-1.94621	RAB6A	0.676	SKP2	0.442318	NFS1	-0.191212			WSB1	-0.125888	SCML2	-0.631862	ANKRD18DP	-0.127813	LINC00622	-0.226148	CANX	0.050206	SNORD114-11	-0.841564	MIR567	-0.298693
HDGF	0.42	MRPL43	0.182	SLC22A17	-0.144391	TMEM106A	-0.447766	SLC25A5-AS1	-0.226118	SERTAD4	-0.424054	OPRM1	1.03931	PIWIL2	0.16481	TOMM22	-0.15367			PATZ1	0.690196	ZFAND2B	0.479	AFF4	-0.738615	TMPRSS15	0.208875			ARF6	-0.0818727	HOXD9	-0.924689	SLC25A45	-0.0698941	ZDHHC17	-0.123749	LPL	0.0172286	RP11-329L6.1	0.563508	AY830714	-0.298693
NOL8	-0.289	CDC14A	-0.258	RNA28S5	-0.53503	ASB3	-0.257131	RGMB-AS1	0.761974	NHP2L1	-0.343686	PTPN3	-1.00633	ZFAND3	0.174905	KCNC1	-0.0882751			PAX8	1.30227	DOT1L	0.782	CXCL5	-1.41372	TMEM38B	-0.293241			LILRB1	-0.10621	SOX2-OT	-0.393667	NFYC	-0.0882887	SPATA5L1	-0.155171	SNRP70	0.0287075	MIR5586	-0.723907	AK125521	-0.298693
PSG10P	-0.0915	ALDH8A1	-0.279	ITIH5	-0.132095	PCBP4	-0.170098	PTEN	-0.313502	DUSP9	0.157263	TGM3	0.413052	HSPA12A	-0.310696	ARPC1A	-0.0789319			MYO15A	1.2081	TSC22D4	0.54	RPS6KA2	-0.611985	GON4L	-0.205179			KIF21A	-0.0923555	CELF2	-0.930834	NT5E	0.233193	RAB35	-0.247161	RAI16	-0.070283	DLK2	-0.809974	GCET2	-0.298693
PPP1R2P9	0.193	GLO1	0.216	SNRPN	0.170791	HPR	-0.178105	KCNQ2	-0.358924	RBM15	0.345706	NMNAT2	0.845985	VASP	0.168301	NR1H2	-0.10406			SHOX2	-1.68442	SNX15	0.507	KATNBL1	-1.48437	SLC13A2	0.146708			SFXN5	0.130331	CST5	0.437712	XRCC6	-0.117829	BCL2L14	-0.112674	ZNF137	-0.0415246	JAZF1	-0.464275	FAM150B	0.313166
SCARB2	0.232	PLB1	0.114	SLC22A12	0.121306	MTAP	-0.242146	PERP	0.832412	CDCA2	0.0838892	ZNF573	0.91664	NRXN3	-0.232548	ACTR2	-0.0813682			GPR20	-1.29449	APOC4	-0.519	ZNF432	-0.404972	FABP5	-0.336164			DSP	-0.218747	CTNND1	0.688327	TAF1A	-0.138745	N4BP2L2	-0.141527	SERPINB5	-0.0467742	RP11-202H2.1	-0.591664	AY358517	0.313166
RANGRF	-0.422	ABHD17C	-0.24	KLF16	-0.125148	LIPA	0.577193	BNC1	-1.47249	CLDN19	0.110631	EMID2	-0.447249	PSMC2	-0.212959	DHX30	-0.0603352			TRIM3	-2.43503	NCSTN	0.641	SERPINB9	-0.775347	ZC3HC1	-0.170019			GLDC	0.0929085	TUBGCP4	-0.401286	CD47	-0.106659	DPP9	0.105289	ADARB1	0.0336076	AL358933.1	0.524187	C3orf26	0.251651
STX10	0.224	HIST2H2BE	0.476	TUB	0.120693	OR12D3	0.204815	GLS2	1.24175	NDUFB2	-0.167246	CHSY1	0.935052	MAST2	0.214269	LOC102723968	0.12838			B4GALT3	1.13948	XPO7	1.01	SRGAP1	0.271778	ZNF548	-0.276119			FBXO2	-0.0642102	ADGRF5	-1.15865	SLC25A48	0.0963146	MAPK8IP3	0.110216	MRPS24	0.0224946	RP11-586D19.1	-0.766079	BC006512	0.251651
CFL1	0.156	MAP3K19	-0.165	ERAL1	0.275782	CLDN14	-0.243716	RABEP1	-0.230108	ITGB1	0.608462	YBX1	-0.640822	DOCK6	0.176934	ANKRD34B	0.10287			LOC101928152	-1.55701	IGF2BP3	0.692	APC	-0.737237	TMEM170A	-0.181166			ALG13	-0.132671	ZNF829	0.428427	SIAE	-0.136513	TMED5	-0.14281	CRABP1	0.0520835	AC005518.2	-0.550346	NHEDC1	-0.268615
SIAH2	0.398	RAB3A	-0.173	SH2D5	-0.162614	REPS2	0.229908	QTRT2	-1.06027	DHCR24	-0.368913	SPRY1	1.61135	COL6A1	0.206049	SH3GL2	-0.0765091			AQP2	-1.6896	RAB1B	0.452	AZI2	-0.595552	SRD5A1	-0.326384			JKAMP	-0.100776	ABLIM1	0.487915	B4GALT4	0.0877362	UBE3B	0.144501	ACTB	0.0327482	GLS	-0.596189	4q24	-0.268615
KIAA0430	0.276	COL4A2	0.161	HAX1	0.217602	INO80	0.178062	LINC01125	0.44018	CDK5	-0.530361	SLC47A1	0.296318	PPP1R13B	0.193115	PTPRR	-0.136005			DBIL5P2	-1.70443	MTMR15	-0.844	SMYD1	0.346504	ECSIT	-0.201817			PSMD4	-0.0737276	ZG16	0.511063	MIR34B	-0.101456	SRC	-0.159282	OKL38	-0.0245677	RGS7BP	-0.818865	DQ003059	-0.268615
CRIP3	0.105	PCDHA10	-0.104	GABRG3	0.109748	NHLRC2	0.200187	ARHGAP35	0.308654	RNF123	-0.452282	CHD4	-0.969209	MYO15B	0.133716	RAB33B	-0.105455			SLIT1-AS1	-0.936577	PCMT1	0.88	KIAA1147	-0.656613	TLR5	0.380955			TAP2	-0.105924	PCDHGA10	0.448936	TOM1L2	0.0992385	TBL1X	-0.101214	NOL4	0.0544022	KL	-0.658903	RTN4RL1	-0.567722
CD47	-0.324	HNRNPH2	0.198	CACNA1C	-0.13243	LRRK1	0.143466	NANOS2	0.633279	E2F2	0.131843	MOBKL1A	-0.860089	GNB1	-0.500797	COX7A2	-0.119406			FCN2	-2.03869	COL6A3	0.719	SLC24A3	-1.43317	LIN7C	-0.172688			DCTN6	-0.0889222	NBR1	-0.4134	GPAA1	-0.0704966	SMUG1	0.102306	MPPED2	-0.0341013	CACNB4	-0.631715	BC128608	-0.567722
TYW3	-0.153	KLKP1	0.104	YPEL3	0.487012	CMTM7	0.293186	TRAM2-AS1	-0.273563	NFIB	-0.573258	DMD	-0.234318	MT1H	0.359124	CHML	-0.159843			SLC6A3	2.12299	FAM13A	1.64	ARF3	0.513045	RAB40B	-0.291415			PBDC1	-0.152964	SUMO1P1	-0.621005	SAMD3	-0.0865878	PPP2R5D	-0.124144	P2RY14	-0.0484262	CTD-2196E14.9	-0.421633	CYB5R1	0.236128
CDAN1	-0.143	MRPL36	0.244	GOLGA8DP	-0.115826	ZBTB1	-0.171679	LOC101927503	0.513642	MEF2C	0.0713429	SCARB2	0.340885	KIF3C	-0.318354	TMEM17	-0.162333			LOC100506107	0.781504	NDFIP1	0.681	MEG3	0.403256	ZBED4	-0.259831			NABP1	-0.12375	ABLIM3	0.893916	ACSS3	0.241794	APOL5	-0.11323	ETS1	0.028502	PALMD	0.551669	AY359026	0.236128
TCEB2	0.211	POGZ	-0.145	MITF	0.107917	MAPK14	0.198082	ADCY3	-0.25497	ZFHX3	-0.453086	SUN1	-0.868347	ARVCF	0.201858	ATP1A3	-0.129724			SOX21	1.72136	ANGEL2	-1.49	TRA2A	-0.936502	MTERF4	-0.249645			LCP1	-0.341621	SNORD77	-0.482793	MT1JP	0.195969	ERVK13-1	0.135484	NRIP1	-0.0517635	FAM49A	-0.650455	SLC39A14	0.263528
ZNF683	0.597	MAGEA6	0.107	GYPE	0.460951	MTMR14	0.30486	RGS9	-0.794321	ALAS2	-0.275022	ASF1A	0.92711	TUT1	0.224775	NAP1L3	-0.1161			ZFHX3	1.35903	ASCC2	-0.52	TBX5-AS1	0.386861	LOC101927752	-0.223371			CUTA	-0.0671714	MIR579	0.546543	SLC27A4	-0.0980848	CCDC85B	-0.127426	RAB20	0.0321313	SLC45A1	-0.553599	AK295807	0.263528
VAV3	-0.176	PCDHGB6	0.188	RALYL	0.138761	OR5J2	-0.148301	EMILIN1	-1.17003	SIGLEC6	0.125812	C18orf1	-0.745892	FBXO31	0.147375	CX3CL1	-0.119619			PVR	2.3304	TNFRSF14	0.471	TTBK2	-0.769793	ZNF367	-0.362954			MRPS12	-0.0970569	MIR34B	-0.331053	STMN1	0.139835	ATP6V0E1	0.22485	CCDC64	0.0288154	RP13-514E23.1	-0.694801	C6orf201	0.241545
GRN	0.44	DSCR3	0.322	OR5H14	-0.108829	ASB4	0.199341	SPTBN1	-1.30037	GSR	-0.430918	PLAC8	-0.160942	PLXNB2	0.21091	BDNF	-0.241344			LOC286191	-2.19513	RAB24	0.411	BPTF	-0.631079	TBC1D32	-0.223781			PRR13	0.059213	ZNF585B	0.631702	MPI	-0.0953102	EPB41L2	-0.239544	OXTR	0.044137	PMS2	-0.272636	FNBP1L	0.241545
USP12	0.167	IL13RA1	0.362	VAMP5	0.390085	NPAT	-0.252106	L3MBTL1	0.706971	TMEM50A	0.425504	MFSD4	-0.549657	CITED2	-0.379861	AMBP	0.0943961			GJA10	1.41388	RCBTB1	-0.645	NFKBIZ	-0.694381	LOC100505549	-0.24198			SCARNA9	0.101157	TRPM8	0.494743	SLC9C2	0.121265	C6orf201	0.219982	NME1	0.0372947	SPOCK2	-0.545904	BC047663	0.241545
DSCR3	0.254	FERMT3	0.419	GDA	0.146673	KRTAP10-7	-0.189233	TTC17	0.366929	ZNF132	0.56382	HTN1	-0.128595	RECQL5	0.146872	SPOP	-0.137115			GPR173	-2.05139	TMEM27	0.805	LOC101927043	0.291245	PDCL	-0.220844			FUNDC2	-0.196259	CCSAP	-0.466367	PCDHA1	-0.101156	NME9	0.11261	WFIKKN1	-0.0643784	ZSWIM3	-0.455578	BC066986	0.241545
GLO1	0.183	DENND5A	0.253	MYO7B	0.11901	ACCSL	0.157743	IRF4	0.9962	MED25	0.40701	HPR	0.41422	RPL12	0.157473	PLEKHB2	-0.131831			RNF17	-2.09603	C3orf10	0.79	IGFBP5	0.350706	TNRC6C-AS1	-0.231707			VPS11	-0.102871	PLEKHF2	0.622771	S100A11	-0.177971	ABCC8	-0.122728	ENDOG	0.0209513	CNTN6	-0.701775	AK301893	0.241545
FAM47C	-0.093	RAP1GDS1	0.178	MSANTD2	-0.175657	ANKRD10	-0.189321	TNS2	-0.660958	CLK4	0.465587	METTL2B	0.834617	TMPRSS5	0.156482	LOC100130428	-0.128759			AMER3	-1.0203	PROM2	-0.559	FOXH1	0.383521	SRP72	-0.258051			C8orf33	-0.100803	DRAXIN	-0.458972	MGST1	0.242446	SPTLC2	0.340535	SP3	0.022411	TMEM38A	-0.528073	AF257175	0.241545
METTL26	0.167	LRRC25	0.352	MAPK8	0.16929	GUSBP2	-0.244035	YWHAEP7	0.397655	CLCN4	-0.408995	RCOR1	0.422205	ACSF2	0.187633	PFAS	-0.0798997			ADGRG1	-1.70682	PAFAH1B2	0.698	RUNX1T1	0.314205	LYPD5	0.178326			DDOST	-0.0713474	FUCA2	0.974607	AHCYL2	0.120087	STAG3L3	-0.141049	JAK1	-0.031117	ST6GALNAC1	0.652321	PECI	0.241545
EXOSC2	-0.118	ARID4A	-0.173	ZFYVE16	0.170779	TFF2	0.175545	CRTAM	1.05287	ZNF354C	-0.230606	CAB39L	1.00386	AP1G2	0.309548	ZNF516	0.100802			ARHGEF17	-1.54595	FAM105A	1.18	NR3C1	-0.786795	NKD2	0.134499			CSMD2	0.065853	MIR1255A	-0.326399	SLC15A2	0.281092	GRHL2	-0.13975	CGNL1	-0.0302346	SFXN1	-0.317375	AK124114	0.241545
HAX1	0.178	C11orf80	-0.447	BAGE2	-0.112578	S100A4	0.305845	RIT1	0.292943	NMT1	-0.496976	LONP1	-0.599486	ATF6B	0.133313	SNX10	-0.114087			CCDC7	-1.78241	IRF6	0.688	LOC100506675	0.238657	PEX19	-0.174721			MKKS	-0.162817	C16orf96	0.579638	ACTR3	-0.1134	VN1R3	-0.120641	ZFYVE19	-0.0375391	KCTD2	-0.346329	OR4A15	0.296769
SNORD54	0.145	CDH23	0.314	SPACA4	-0.134782	DDX19B	0.276949	LOC100507468	0.739989	DDX1	-0.214285	RAB6A	-0.121095	ZNF76	0.149941	GBAP1	-0.139981			TNP1	1.45629	DMGDH	0.622	RNF180	0.222885	DDX31	-0.23559			SMC2	-0.160593	FBXW8	0.497341	MORF4L1	-0.0806107	FGFR4	-0.114678	TOPORS	0.048689	NIPSNAP1	-0.44016	11q11	0.296769
TBC1D13	0.14	OR2M3	0.0975	LDB2	-0.173246	LHFPL5	0.172301	ITCH	0.258524	ZNF772	-0.515254	GSDMB	0.285297	FAM134B	-0.238203	ZNF584	-0.0713912			ARTN	1.05935	TAS2R46	-0.723	ACOD1	0.268608	CYB5B	-0.296453			SORCS2	0.084495	HPCAL1	-0.468439	ANAPC7	-0.0922748	ZBTB7B	-0.0926173	MRPL24	0.0228658	AC007383.3	0.484328	HIST1H3I	0.346282
MAP4K4	-0.156	ARF3	0.219	RAD21	-0.503196	BUB3	-0.289946	AQP6	0.440292	EPHB4	0.146867	C14orf148	0.401855	OLA1	-0.209222	ANKRD27	0.11398			UBA6	-1.89248	PHC3	0.705	TTLL3	-0.47774	SLC45A3	-0.24515			BATF3	0.0662071	MT1H	0.423416	TRAPPC13	0.10923	LINC00521	0.132573	ICK	0.0563465	FDX1L	-0.538051	BC066884	0.346282
CHMP2A	0.298	CDK13	-0.289	UPF1	-0.198109	CCR8	-0.157414	WDR37	0.327797	C20orf69	0.346259	PGM5	0.389633	NEBL	0.201372	TNP2	0.0993396			VEGFC	-2.3248	PLSCR4	1.41	KLF9	-0.794538	MTURN	-0.578799			OLFM2	0.0953441	PBLD	-0.507755	USP53	0.144917	SOX30	0.124593	UROD	0.0457447	AF238380.3	-0.441964	MGC72080	-0.688183
TMEM131	0.214	FAM224A	-0.115	RNF123	0.226852	CSN1S2AP	-0.147255	CD180	0.790381	NPEPPS	-0.246421	C6orf72	-1.2004	PRKAG2	-0.264774	RAN	-0.0831823			WBP2NL	-1.12058	RNF25	0.371	PLXNA2	0.494124	PNN	-0.0963321			CDR1	0.42589	NNT	-0.506958	FRS2	0.0838516	COPA	-0.0910844	FER1L3	0.0358911	KIAA1644	-0.963718	BC062733	-0.688183
SCAMP5	-0.0979	DEC1	0.163	FAM133B	-0.321584	G3BP1	-0.177987	RBM22	0.36786	LFNG	0.149284	MAP6	0.761754	INHA	0.171664	SNORD115-44	0.15638			LOC101929064	-2.01377	LOC643008	0.779	EGFLAM	0.294718	LOC441204	0.146717			NUBPL	-0.0774494	TTC5	0.369576	MIRLET7A2	0.124761	DYNC1LI1	-0.0795799	LRIG2	0.0230291	RP11-238K6.2	-1.09798	AK125166	-0.688183
TRPV6	0.111	SNORD12	0.127	CEACAM4	-0.142094	ETV6	0.184883	GFAP	-0.997122	SCRN1	-0.560138	CCT3	-0.526234	LRTM1	0.122983	UQCRC2	-0.0801491			LOC102724809	-2.66283	LEFTY2	0.558	TMEM64	-0.630608	ING3	-0.343757			SLCO2B1	-0.149289	WNT2B	-0.543573	BLM	-0.0991085	CNDP1	-0.117449	FMR1NB	-0.0473087	WASF2	0.548945	LOC441268	-0.688183
EMC1	-0.154	DEFA1B	-0.124	ADAT1	0.216338	IER5	-0.340148	ADD1	0.761913	TFCP2	0.430655	PEX1	0.733696	VRTN	0.215724	SPINT2	-0.0948621			CACUL1	3.04757	TMEM91	0.508	PF4V1	-1.73831	TST	-0.196212			METTL6	-0.116171	ARHGAP30	-0.485678	WWC2	0.105821	FLJ33360	0.0930544	DLL1	0.0382104	WIPI2	-0.245166	GSPT2	0.274998
GH2	-0.106	SPIN4	-0.214	PSG10P	-0.117878	RPL10L	-0.177263	LRCH3	0.4601	MGC31957	0.121029	UBTD2	0.735752	KIAA0586	0.10424	CTSZ	-0.108659			LOC101928201	-1.99648	SARDH	0.583	KCNQ1	0.41127	RUNX2	-0.221976			CYP51A1	-0.0905814	CNOT9	0.492767	CPVL	-0.140289	USO1	0.122475	DHH	0.0608827	SNORD116-25	-0.667043	BC036077	0.274998
TREX1	0.109	MAFF	-0.175	MIR548B	-0.115995	EFNA4	0.19618	C6orf89	-0.777495	RAB35	-0.660513	SPATA9	0.265256	UNC119	0.138152	ATXN7L2	-0.0997865			OSBPL11	1.76946	C17orf88	-1.93	UBE2B	-0.93867	GAS2L1	-0.432232			PRKAG1	-0.0985163	MS4A1	0.612518	SMPX	-0.144081	TNFAIP2	0.109703	CDX2	0.0282354	BTG1	0.356926	POLR2D	0.237968
ZNF211	0.158	LOC101927762	-0.152	COL11A2	0.168447	SNORD12C	-0.230089	ZNF518A	0.367965	THOC6	0.167168	MSL3	1.09251	RPLP0	0.131617	TXN2	-0.115856			LOC574538	1.0192	TRPT1	0.49	EPM2AIP1	-0.411562	RNPS1	-0.175153			P4HTM	-0.113552	PTPA	0.653142	ST6GALNAC4	0.0654169	CHURC1	-0.400109	PVRL1	0.0228937	FBLL1	-0.727727	2q21	0.237968
MRPS2	0.154	ZNF559	-0.308	ARHGAP36	0.124902	GPANK1	-0.152378	LOC101928551	0.686724	PAFAH1B1	-0.154098	TJP2	-0.244307	COMMD8	-0.216602	VPS33A	-0.089204			ZBTB42	1.71912	GADD45A	0.939	HIPK2	-0.672961	SF3A2	-0.442509			KIAA1671	0.0779391	ABI3	0.508732	RNASE6	-0.17995	OR8G2	-0.113541	C9orf75	0.0507307	KCNQ3	-0.796519	BC017205	0.237968
ARPC4	0.282	CHRM1	0.109	USP8	-0.260066	SLC35A2	-0.20702	PDXK	-0.286806	NCEH1	0.259522	POLH	0.410303	DIRAS2	-0.402618	HIST1H4H	0.176392			AGO4	1.37978	PRKCQ	-0.669	HOMER3	0.517945	MLLT11	-0.239646			TMEM59	-0.0894368	KIF23	-0.678656	PLA2G4A	-0.168078	LOC102723709	-0.192448	FLJ20718	-0.0649151	SLIT1	-1.20475	GPR52	-0.752775
ZFYVE16	0.138	OS9	0.278	RERE	-0.168804	INHBA	0.156664	CFAP45	0.471447	COX7A2	-0.205493	GNB2	0.730373	MUC8	0.192215	ACOT4	-0.115538			XPNPEP3	-1.28631	ARMC3	0.953	CELF1	-0.327981	ZFYVE21	-0.152328			COX8A	-0.128398	MIR552	-0.393466	MFNG	-0.105269	LOC102723678	-0.192448	SLC9A3R1	0.078958	FBXO40	-0.962069	1q24	-0.752775
CHN2	0.135	RBM43	-0.271	HRASLS5	-0.150346	TRIM16L	0.340536	COPZ1	0.269481	SF4	0.100055	LY6K	0.357646	CNOT8	-0.305721	HLCS	-0.137809			LOC101929486	-1.28277	CADPS	0.743	PDCD6	-0.34639	FOXK2	-0.183728			SAMD4B	0.0804283	PMP22	-1.09081	TSHZ1	0.11111	LEPROT	0.214621	GMNN	0.048906	AL050316.1	-1.23936	BC095532	-0.752775
ZMYM3	0.123	CSF2RA	-0.556	MYO3A	-0.126451	SNORD48	0.180257	PABPC1L	-0.478871	COX4I1	-0.15449	AGPAT4	0.73182	RAB31	0.344585	TMEM109	-0.0875004			LOC102724537	-2.4163	GLB1L	0.91	ADAM7	0.255635	SFI1	-0.269998			CMPK1	-0.117318	ANXA3	-1.1859	HSD17B6	0.295281	LEPR	0.214621	CCDC6	0.0223349	DNAJA3	-0.252974	PLK1	-0.265819
SEMA4A	0.308	C9orf72	0.391	KLRD1	0.135985	RNASE11	0.167644	LOC101927610	0.344761	RGS6	0.210049	C2orf55	0.546096	LPGAT1	-0.320728	RNF44	-0.0761082			CCDC62	1.03324	POPDC3	0.65	LOC101928043	0.308949	GNAI3	-0.317531			HEPH	0.16269	DEFB125	-0.462049	TERF2IP	-0.102095	C2orf74	0.198573	MRPL53	0.0252641	SYN1	-1.10304	AB209179	-0.265819
TGFBI	0.354	PSMB3	0.274	FAM65C	-0.113511	YBEY	-0.320188	HIC2	0.857238	PPP2R5E	0.220224	CYTSA	0.243289	MKRN1	-0.296286	EEF1AKMT1	-0.12335			SUB1	0.84548	RTN4	0.461	HMBOX1	-0.99922	DDX46	-0.169566			MSL3	-0.100388	DNAH14	-0.344438	PGGT1B	-0.110347	KIAA1841	0.198573	CASC3	0.0449565	CCAR1	0.400279	C17orf75	0.245501
PKNOX1	-0.237	SRD5A2	0.105	GGA2	-0.348591	ANKRD44	-0.275091	TMEM100	-0.902653	ADAM33	0.125141	LOC390940	-0.413959	CAMTA1	-0.268658	ATP6V0C	-0.0806993			UBXN10	1.7331	KDM3A	0.858	HTR1D	0.239915	ZNF738	-0.385846			FAM49B	-0.118073	SPIC	0.430619	SFXN3	-0.0981116	TMEM189-UBE2V1	0.137855	ITGB1BP2	-0.0573042	CD99P1	0.697953	BC026017	0.245501
WHAMMP3	0.123	ANKRD39	-0.15	TNFAIP8L1	-0.369663	ZNF860	-0.422346	MICALL1	-0.676468	ASNS	-0.228058	BBX	0.661819	PTP4A3	0.187886	ASB13	-0.106097			EMP2	1.10578	C10orf79	-0.773	SCAMP4	0.309509	TRIB2	-0.282962			ELAVL2	-0.183989	SCARNA18	-0.542379	ATP5J	-0.0855183	TMEM189	0.137855	C18orf21	0.0475675	TBC1D9	-0.615393	POTEKP	-0.699481
APLP1	0.122	MIR1251	-0.11	COX5B	-0.285772	CCL3	-0.54207	LOC100506731	-1.51639	UCHL1	-0.0973644	RB1	0.715801	RHOC	0.269228	CLCN4	-0.0996793			ACY1	-1.15269	PCYT1B	0.825	BREA2	0.40896	C12orf50	0.123192			CDC42BPB	0.0463252	ARL13B	-0.4952	HCCS	-0.204165	UBE2V2	0.137855	KLK9	-0.02529	PRPS2	-0.549277	POTEE	-0.699481
SCYL1	0.309	SLC22A18	0.293	CTBP2	0.118484	HNRNPA2B1	-0.392265	C11orf70	-0.709851	PSMA7	-0.420621	KIAA0317	-0.80799	GALNT10	0.208761	TMEM150A	-0.0839689			MEX3C	1.03765	FAM160A2	0.613	LINC01578	-1.04121	SAFB	-0.14155			CCDC146	0.0976879	OR52B6	-0.60259	ZNF143	-0.107211	UBE2V1	0.137855	CDIPT	-0.122359	C1orf216	-0.609049	POTEF	-0.699481
URM1	0.308	ZNF740	-0.12	HPS1	0.342799	SLC37A3	-0.173374	ZFYVE16	0.655553	GABARAP	0.121447	APP	-0.147042	TNNT1	0.186031	PGLS	-0.11376			HES1	-1.86656	TPX2	1.3	OR5H1	0.23167	CTSZ	0.163165			LYVE1	-0.187303	STARD13	-0.367978	NDUFS2	-0.128449	CYAT1	-0.201289	HOXA13	0.0524848	RP11-449L23.2	-1.24856	POTEG	-0.699481
RNF220	0.159	FKBP15	0.207	TRIM71	-0.0875574	POLR1E	-0.199379	FCGR1B	0.743934	PHF20L1	0.470396	SYNJ1	0.312829	RASGRF1	-0.31754	COX20	-0.0981462			THPO	2.59366	STIL	1.51	BMS1P5	-0.776481	FAM120A	0.256313			PDHA1	-0.0824257	ARHGAP29	-0.616063	PAF1	-0.083743	IGLV1-44	-0.201289	RTP1	-0.0499693	EGF	-0.543576	POTEH	-0.699481
SLC3A2	0.234	ZYX	0.36	ZBTB44	-0.223824	ACTR2	0.313409	CYP2E1	0.878348	C1orf52	-0.691286	CREB3L4	-0.190185	MAD2L1BP	-0.187047	TM9SF4	-0.0815414			GPRIN1	0.937033	EIF1B	0.781	CXorf36	0.361854	DOPEY1	-0.197591			TANGO6	-0.162836	RPS6KA6	0.545673	SLC2A6	-0.084265	IGLC1	-0.201289	HSPB8	-0.0653038	ADH1B	1.12695	SMPD4	-0.699481
QPRT	-0.127	UBE3A	-0.209	ARHGEF12	0.189037	SYCP2	-0.189808	LOC285847	0.262514	PPIA	0.17815	DEM1	1.17266	DKFZP434A062	0.121476	FUZ	-0.0902491			AK9	0.76348	FAM131B	0.932	SLC16A7	-0.867108	FAM204A	-0.237945			SRSF7	-0.145068	CES5A	-0.493966	PPT1	-0.119901	KIR3DL2	0.208776	GNGT2	-0.0505654	PIK3CB	-0.320253	POTEM	-0.699481
SYNJ2BP	-0.347	SNORD114-30	-0.115	LRRC26	-0.447715	PRDM16	-0.172431	PRKCA-AS1	0.859644	RRP7A	0.32217	BANK1	0.168204	KHDRBS1	-0.206148	APMAP	-0.120144			TKFC	-1.19086	CCR1	0.756	FBXO9	-0.519695	LRRC8A	-0.150613			TRAPPC6B	-0.149588	MICU3	-0.479877	SPC24	0.0753569	KIR3DL1	0.208776	EHMT2	0.0333906	KBTBD11	-0.296028	EF523384	-0.699481
MUC1	0.081	TBC1D28	-0.115	CCDC18	-0.120649	PLA1A	-0.193122	ZNF653	0.621355	PHC2	0.306511	RBM39	-0.915433	HYI	0.146405	GPRASP1	-0.142518			EFEMP1	2.42664	CARD9	0.718	ZNF473	0.341296	PSME4	-0.159177			SLITRK2	0.0747896	C3orf79	0.427351	C10orf111	-0.0597584	CKLF-CMTM1	-0.292545	NEDD8	0.0182464	STXBP5	-0.494098	AY462872	-0.699481
CNOT10	0.128	EGR3	0.213	ID4	0.120815	SORT1	0.251309	TSPEAR	0.996646	CADM3	-0.425292	EIF2S3	-0.28894	SMO	0.149208	IDH3A	-0.121475			HSD17B12	1.20092	RAB5B	0.44	PRB1	0.370855	ZNF678	-0.249013			ATP13A4	0.22637	UGT2A2	-0.340103	HDLBP	-0.0881442	CKLF	-0.292545	MGC24381	0.0181291	RP4-798C17.5	0.916819	AY462868	-0.699481
SNORA61	0.253	APLP1	0.152	ANKK1	0.11954	MAP3K8	-0.234832	COL3A1	-1.71482	ANKRD34C	0.351414	PAFAH1B1	0.354477	SC5D	-0.213442	PIK3CB	-0.0983032			SLC26A10	-1.33847	DHDPSL	0.737	EFCAB14	-0.424319	ERF	0.418234			USP19	-0.111665	ABCA3	-1.04001	HNMT	-0.097189	LOC101930476	-0.151841	PTPRS	-0.0317335	CECR6	-0.705889	AY462873	-0.699481
SLC6A10P	-0.0792	HAUS3	0.0921	ACTR3B	-0.130954	TXNRD1	0.266028	HNRNPD	1.05555	DLEC1	0.155034	SLC48A1	0.668661	MRPL15	-0.245218	ACP2	-0.0748657			RASL11B	-1.89781	PDPR	-0.636	GOPC	-0.985121	NDFIP1	-0.196598			FAM149A	-0.0722211	ZNF48	0.478343	PPCS	-0.0734821	LINC00476	-0.151841	NDUFA5	0.0284396	FAM32A	-0.335415	AY462874	-0.699481
IDH3A	0.157	FAH	0.183	PSG7	0.136158	KRT77	-0.138949	ABHD2	-0.411419	LOC100287942	0.284811	NLRP2	-1.57204	CRAT	0.131954	L3MBTL2	-0.100428			PTOV1-AS2	-1.62002	ALG8	0.654	ZNF345	-0.495301	DGKE	-0.289995			SSBP3	0.0679686	SEC24B	0.532342	TBRG4	-0.0694807	CNTNAP3B	-0.159418	SHOX2	0.0366432	TBR1	-0.922584	AY465172	-0.699481
PI4KB	0.12	MOGAT2	0.129	SPTB	0.124396	PIM1	-0.326179	LOC643711	0.561125	KIAA1549	-0.383349	SLC30A10	0.627525	PRUNE2	-0.168697	FAH	0.122754			MYO10	-0.929758	AURKA	-1.5	CLRN1	0.329844	SP140L	-0.272842			SPATA2	0.0737728	SERPINA4	0.553902	CST11	-0.0836632	CNTNAP3	-0.159418	KLF2	-0.0579265	PLCH1	-0.762704	BC056154	-0.699481
NR4A2	0.618	HPRT1	0.262	ANAPC16	-0.307741	C1orf56	0.159131	AGAP4	0.612164	ITGAL	0.113937	C10orf46	-0.593619	TRIM37	-0.247951	DNAJC11	-0.0779475			HEATR4	2.21039	SPP2	0.683	KCNJ16	0.287693	IGLC1	-0.705833			ERICH1	0.0719494	FRG2	-0.387495	DPH3	-0.111286	SH3GL1P2	-0.158471	STAP2	-0.0661914	RP11-561B11.6	-0.813609	RHOQ	-0.699481
PML	0.101	LOC105369266	0.166	INVS	0.146658	ASIC3	-0.198756	SOST	2.02437	R3HDM2	-0.146359	LAPTM4A	-0.593893	SIDT2	0.144457	CD69	-0.188137			RAP2A	-1.47617	SRP54	0.851	NECTIN1	0.334745	GCC2-AS1	0.176854			DNAJC19	-0.0899523	DNMT3L	0.511264	HERC3	-0.137902	SH3GL1P1	-0.158471	GCM2	0.0500363	HCAR2	1.23573	2p21	-0.699481
OLMALINC	-0.102	CDCA7L	0.19	SH3RF3	-0.143034	NCALD	-0.294728	EHMT1	0.303915	CDKN2A	0.112779	PLP1	-0.810782	CTH	0.111937	ERMAP	-0.0833024			NPR1	1.26948	POLE3	0.697	SRXN1	0.691666	GFER	0.203208			ALDH1L1	0.152857	PSORS1C1	0.723885	HCRTR1	-0.0743289	MICA	0.230107	MMP1	-0.0477453	FBXW7	-0.472202	BC065291	-0.699481
EPS8L2	-0.169	CETN2	0.229	C11orf54	0.155063	DMRT3	0.149424	ARNT	0.374227	TOMM22	-0.236987	THBS3	0.492419	NPR1	0.19004	CELF3	-0.100901			IL20	-2.51603	PGM2L1	0.852	LOC727820	-1.00029	LMNA	-0.337496			LRRTM3	-0.126888	CHD3	-0.939432	ARF4	-0.120486	MICB	0.230107	SPIN	0.0262762	GJB5	-1.06908	BC070485	-0.699481
RFX3	-0.0963	SLC16A12	-0.252	PDE4B	0.189703	MSR1	0.16556	CAV1	-1.00115	OPALIN	-0.546609	DDAH1	0.602059	EYA2	0.177861	NUP153	0.0760742			LINC01103	2.28404	SMAD6	-0.682	HACD3	-0.518499	TAF5	-0.16972			ARPC1A	-0.051842	FBXO44	-0.837979	PPP1CA	-0.0821378	CCL15-CCL14	0.112193	FMNL1	0.0400844	WDR47	-0.449162	BC120998	-0.699481
LYRM7	-0.21	CPM	0.204	RALGAPA2	0.159606	LAMP3	0.160509	CCDC134	0.422969	SERPINF2	0.107645	MIF	0.579471	GABRG2	-0.635963	LINC01551	0.107429			LOC100506731	1.01125	STAMBPL1	-1.31	CLNS1A	-0.712358	LOC101927143	0.145416			PSMD7	-0.0837413	FIGNL1	-0.66182	FNDC3B	0.124957	CCL14	0.112193	AKAP1	0.0240641	CYP4B1	0.934679	RAB6C	-0.699481
TUBA1A	0.319	CPQ	0.196	MRPS2	0.1969	ZMYND8	0.16526	DENND4C	0.320398	DST	-0.351613	MYBPC1	-1.20004	FGGY	0.170833	MSH6	0.115965			NRP2	-2.03725	SAPS2	0.429	CYP4F62P	0.280213	ZNF827	-0.371548			SURF4	-0.0652121	CYP4F3	0.516352	BOD1	-0.0626267	LOC102724951	-0.385367	PCDH11X	0.0292021	AC144833.1	-0.74526	POTEJ	-0.699481
GPR22	-0.106	BMP6	0.353	C15orf48	0.144869	RPS26	0.166833	NOV	0.648593	SF1	0.337931	HIST1H2AJ	0.24741	PSMD1	-0.280357	KIAA1841	-0.0971623			PALMD	-1.07116	KIAA0831	-1.24	TGS1	-0.546014	GYG1	0.257942			ARMCX1	-0.0943063	ZNF675	0.425571	POLR3B	-0.111676	LOC389831	-0.385367	DUSP16	0.0181027	MAS1	-0.918673	AY014272	-0.699481
UBN1	-0.4	CD1A	-0.198	CDH8	0.122212	DPYSL2	0.36205	SERPINB3	-0.811746	AQP4	0.615126	DCP2	0.690107	TMEM30A	-0.368818	RAD23A	-0.0813376			CARS2	-1.88269	FAM40B	0.841	CERS6	-0.444324	FZD2	0.220136			RPS6KA4	-0.0857641	UBE2K	0.734016	PROM1	-0.163358	FAM224A	0.610827	OSBPL6	0.0241401	GS1-57L11.1	1.12122	TOMM7	-0.30661
NHSL2	0.12	MIR578	-0.145	NEU1	0.270187	IL13RA1	0.298123	VCAN	-0.539394	MYRIP	0.33328	P2RX7	0.839956	MUT	-0.228562	DMAP1	-0.0637823			LINC00474	-2.18449	XYLB	0.488	MAPK11	0.344764	ARHGEF17	0.145752			SLC26A8	-0.236424	OSR2	-1.89572	PGPEP1	0.0819129	FAM224B	0.610827	MGC13170	0.0212278	BCL11A	-0.704195	TYMS	-0.228858
RWDD2A	0.149	UPF2	-0.204	SEC23A	-0.143142	ZBED5	-0.209296	WFDC21P	0.800442	SGTB	-0.287863	MAP4K4	-0.928437	PPP1R26	0.147687	ADGRE1	0.0834977			FGB	1.22888	PPFIBP1	0.769	ITFG1	-0.211491	C7orf73	-0.307227			RPUSD3	-0.129176	CLDN3	0.364139	DDX5	-0.0973017	FLJ23519	-0.148663	SMC4L1	0.0437297	HIF3A	0.727652	AB062290	-0.228858
MEST	-0.0828	ST3GAL4	0.179	DHRS12	0.154777	PACRGL	-0.178181	MAF	1.01081	CDK5RAP1	-0.388866	TNIK	-0.776027	PPM1E	-0.355557	ATP5B	-0.084992			ADGRL1	1.11584	LOC100129726	-0.697	PLAT	0.226553	SRPRB	-0.329058			ABCF2	-0.0784051	IGSF9	0.342223	GNG12	0.185922	RNH1	-0.148663	GTF2A2	0.0257908	SLN	-1.36372	PMP22	0.333769
C6	0.102	NTMT1	0.172	C1QTNF9B-AS1	-0.142506	PSMB9	0.322055	FBXW2	0.944454	UBE2Z	-0.472255	ILKAP	-0.578718	SEPT5	0.162981	GNB5	-0.09753			PURB	2.39269	TARDBP	-1.11	DDX17	-0.968397	ASMTL	-0.176628			ATP8B4	-0.25005	ITGA9	0.840931	CD300LF	-0.0906916	LOC101930168	-0.133445	ATXN7	0.0215588	FHL2	-0.658043	D11428	0.333769
FAM25A	0.103	NCF1B	0.362	NSUN3	0.17664	CYC1	0.291178	NPL	-0.356727	TRIT1	-0.272064	SLC1A4	-0.921287	REEP5	-0.336759	MAP7D2	-0.116108			PPARG	1.9571	SLC25A37	0.637	SLC26A2	-0.462567	TSPYL1	-0.169004			ASB13	-0.115821	BPIFC	-0.517488	ITIH2	-0.138253	LOC100509620	-0.133445	LOC90355	0.0511725	NAB2	-0.487793	SPINK6	0.262844
ICE2	-0.174	TANC1	-0.139	PDCL2	0.112758	S100A13	0.148853	LINC00112	0.380059	LUZP1	0.285446	OR52B6	0.359918	CPNE1	0.215175	MYL1	0.10527			P4HA3	1.86267	BPGM	1.14	PAPOLB	0.296693	MFSD8	-0.249166			ATAD2	0.111053	ANKRD26	0.971212	CRK	-0.0676492	AQP7	-0.133445	MTTP	-0.0613746	XK	-0.674527	5q32	0.262844
KRT82	-0.0788	CLDN14	0.118	GPM6A	-0.132611	EPHA3	0.170405	TRPM1	1.04594	SHOC2	0.174489	PPM1G	-0.67432	RANBP9	-0.390679	TMEM75	0.0927119			PACRG-AS2	-2.07125	ALAS1	0.471	MGA	-0.822178	ITFG1	-0.123335			ZMPSTE24	-0.0876255	GABRP	-0.580763	SPATS2L	-0.100471	LOC100507472	0.169434	NDUFA4	0.0293541	PLBD2	-0.409881	GQ504704	0.262844
VARS	0.272	CD93	0.394	DDX5	0.247907	UBE2E2	0.326843	CHRNA3	0.301401	SCARNA20	0.147785	NOP14	0.766274	BMP1	0.154685	TBC1D25	-0.0826287			TMEM26-AS1	-1.66268	SLC37A2	0.585	HS3ST1	0.304224	P2RY1	-0.366439			SIRT5	-0.0948166	ZNF267	0.498069	ACTB	-0.0883922	PCSK6	0.169434	HINT3	0.0499689	GAS2L3	-0.572036	LY6G6C	-0.405088
FSD1	-0.104	NUFIP2	-0.241	MIR202	-0.150238	LMBR1L	0.200065	LRRC74B	-0.915638	DDX55	0.28714	RAB9A	-0.86641	PEX3	-0.216174	GPD2	-0.172099			DLX1	-2.3464	INPP5E	0.61	CNTRL	-0.652574	MEPCE	-0.213395			ANKRD37	-0.139653	SPATA31A1	0.67782	LBH	-0.110726	SNORD65	0.130134	PJA2	-0.0245978	NGEF	-0.888933	BC036302	-0.405088
SNORD3D	0.552	ST13	-0.233	CALML5	-0.113108	DLGAP1-AS5	-0.15665	DSG3	1.14664	ZNF750	0.111346	WDR36	1.19396	CFTR	0.147884	MMP14	-0.103521			LOC101929122	-1.78555	EHMT2	0.653	ARMC8	-0.717933	EAPP	-0.16431			GPR179	-0.0948198	C9orf106	-0.46669	LOC286359	0.144911	SNORD49B	0.130134	FCHSD2	0.019858	TNFSF18	-0.774545	MPPED2	-0.303272
BAIAP2	0.154	GTF2F2	-0.164	TIMM17B	0.178613	UGT2B4	-0.141621	SPATA22	-0.784316	EID2	-0.498339	PKD1L1	-0.196203	RABEP2	0.20009	TRNT1	-0.133536			TNFSF8	2.23404	APOA4	0.514	CTB-12O2.1	0.303361	LEPROTL1	-0.151452			HTRA2	-0.082796	ZNF639	0.721425	USP19	-0.0780603	LRRC75A-AS1	0.130134	LMNA	0.0219795	DGAT2	-0.769638	U57911	-0.303272
RPS26P11	-0.109	PRCD	0.123	ZAK	0.316961	AP1M1	0.302463	COL4A3BP	0.302645	PVALB	-0.49037	ZKSCAN5	-1.10069	TPSAB1	0.171772	RNLS	-0.121441			NIPAL4	1.71761	AKAP13	-0.952	ANKRD9	-1.04475	ATP5S	-0.225809			MBOAT2	0.087621	KRTAP20-3	0.640117	UQCR11	-0.0725823	SNORD49A	0.130134	SUOX	0.0342326	FAM135B	-0.674074	CHRDL2	-0.277628
IGF2R	-0.31	SLC9A9	0.223	CCRL2	-0.155128	ANKRD39	-0.223273	AMOT	0.517929	AFG3L2	-0.43001	TTTY6	-0.190965	OSBPL10	-0.27743	SNRNP48	0.130141			SMOC1	1.44975	KIF4A	1.2	CLDN17	0.294618	AP2B1	0.357868			SIX4	0.106419	MYO19	-0.510881	TATDN1	-0.086349	KLRC2	1.12351	C1orf63	0.0375018	CDR1	2.07389	11q14	-0.277628
GCLC	0.19	CD55	0.299	S1PR1	0.329177	HDAC3	0.233829	ZNF347	-0.39668	EDIL3	-0.55167	G0S2	-0.204482	RABIF	-0.190544	COIL	-0.113052			KCTD15	0.889417	STX6	0.632	LINC01346	0.256965	TSPYL5	-0.303503			LPAR5	-0.0875446	MCM3AP	0.414719	BCL9	0.078687	KLRC1	1.12351	IRF2	0.0224938	SNX10	-0.895274	AY358522	-0.277628
TGS1	-0.0805	AGFG1	-0.12	HEATR6	-0.372663	CBX3	0.266082	NABP1	-0.922577	EIF5	-0.474798	SOHLH1	0.726408	RNF111	-0.245317	MPP1	-0.0859307			ATP2A1	-1.45042	STXBP4	-0.988	DMXL1	-0.76914	ADPRHL2	-0.16953			SNORD74	-0.131719	FAM166B	0.534913	FGF17	0.0936016	C4B_2	0.160438	RALGPS1	0.028007	IL4R	0.584155	BC142623	-0.277628
LIAS	-0.136	MEX3C	-0.304	HBD	1.40372	NUCKS1	0.249998	RHPN2	0.625407	SSX7	0.140931	TNFAIP6	0.238898	NPEPL1	0.198133	GRIN2C	-0.173649			KLHL10	1.72655	KIAA1191	0.438	PPARG	0.398807	SLF2	-0.202296			MFNG	-0.0946812	IBA57	0.498726	GLCE	-0.172722	C4B	0.160438	MGC39545	0.0594669	CHST13	-1.1481	AY163868	-0.277628
JAGN1	0.125	SMARCA2	-0.27	SNORD4B	-0.151891	HIST2H4A	0.235902	MRE11A	0.492821	BCL2L2	-0.321784	RUNDC3A	0.562398	NECTIN2	0.16928	KIAA2012	0.112723			PKDCC	-1.38807	RANBP17	2.11	DPT	0.339707	TIGD2	-0.271142			GPC5	0.258746	C10orf82	0.577445	HSD11B1	-0.162662	C4A	0.160438	LACTB2	-0.0874786	CABP7	-0.756036	AY279090	-0.277628
ABHD17C	-0.192	TNFSF14	-0.199	ZNF335	-0.145018	SPNS1	0.517056	LOC100507351	0.668525	LTBR	0.135164	BTBD1	0.521125	PTP4A1	-0.253937	DEPDC1	0.101248			CHRNE	-0.965518	FLJ38717	-0.644	KCNMA1	0.313551	PCDH1	0.212384			MRPS15	-0.0981452	SIGLEC6	-0.435471	PHF21A	0.0921068	NDUFC2-KCTD14	-0.763986	C8ORFK32	-0.0266413	HMGCR	-0.525499	AY279092	-0.277628
TMEM101	0.183	VIPAS39	0.147	IER2	0.333483	NKX2-8	0.137628	CATSPERG	0.385948	PROX1	0.394703	MYL1	-0.23084	TGIF1	0.202276	DCDC1	0.174429			NGEF	-1.73156	YLPM1	-1.09	LOC101929269	0.329306	FBXL18	0.201662			SOX9	0.092535	VRTN	0.41842	TYROBP	-0.0972149	KCTD14	-0.763986	GNMT	0.0544867	CHGA	-1.01892	AK304519	-0.277628
STXBP1	0.0788	AHCTF1	-0.276	NTM	-0.143698	CYBA	0.441124	NAV2	-0.586733	STAT5A	0.137228	UBR5	1.14549	NEMF	-0.247516	ATP5H	-0.106718			GNRH1	0.744174	NCAPH	1.5	CLDN5	-0.613473	ITGA6	-0.290485			TMEM143	-0.0773845	DEF6	0.805927	GPN1	-0.133218	RSPH10B2	0.160073	STS	-0.0538231	GTF2IRD2	0.525378	AY279093	-0.277628
PSMC2	0.186	KRTAP5-1	-0.14	PAX8	0.0950589	SGK1	-0.637837	WNT6	0.374567	ZNF558	0.481651	SERTAD3	-0.214036	ENTPD4	-0.249101	THAP1	-0.130093			SP7	1.76	SUFU	-0.42	SLC25A36	-0.584429	ARIH2OS	-0.260492			DPYSL2	-0.0544878	DEFB132	0.55324	TSPAN5	-0.150778	RSPH10B	0.160073	MRLC2	0.0170483	NT5C3L	-0.462886	AY279094	-0.277628
TAX1BP1	0.205	PRPF4B	-0.21	ZNF250	0.14042	PIGT	0.193569	CDC14A	0.686824	NBEAL2	0.119262	C8orf42	-0.94843	CCT2	-0.216099	UXT	-0.104927			FAM124A	2.49033	KCNG4	-0.666	DENND1B	-0.670783	NCOA1	0.209429			LIX1	0.177459	RFC5	-0.552724	NOSTRIN	0.157423	CSAG2	-0.15122	BTNL8	-0.0679696	CAMTA1	-0.402444	AF332891	-0.277628
SLC25A25	-0.109	TREX1	0.131	GREB1	0.14877	SRD5A3	0.143273	VPS13A	0.815742	C19orf29	0.472946	GNPDA2	1.14026	ARID5A	0.222255	HIST1H1C	0.236634			SUGT1P1	-1.85424	ERC1	-0.601	LOC101929450	0.423624	MINCR	-0.299537			NOSTRIN	0.120312	PURG	0.586904	TMEM133	0.140968	CSAG3	-0.15122	GADD45GIP1	0.0310866	ELP5	-0.263914	C10orf11	-0.363419
ACTL7A	0.0888	TBC1D13	0.159	DDB2	0.183661	FUT11	-0.228922	LOC101927043	0.618902	LOC441178	0.167779	CXCL17	-0.212815	ATP6V1G2	-0.314437	CRLF3	-0.141495			KCNQ1DN	-1.77328	SLC43A1	0.362	MIEF1	-0.340773	XYLT1	-0.258211			RNH1	-0.0963266	TPSB2	-0.383242	PDE6H	0.0824326	FAM138E	-0.105581	TBC1D5	0.02698	PPP2CA	-0.409629	AF267860	-0.363419
METAP2	-0.156	EDN3	0.107	SRP14	0.266655	DCD	0.250268	GIMAP1	1.02548	HNRNPH2	-0.391169	ARHGEF9	-0.966838	LRRC8B	-0.232102	LINC01270	0.121626			RHOD	1.96205	CHST8	0.46	OR13C4	0.307103	UBL7-AS1	-0.260465			MPC2	-0.111504	SMPD1	0.701903	HCLS1	-0.182063	FAM138D	-0.105581	ATXN1	0.0223859	FLYWCH2	-0.348718	ZNF396	-0.351825
OR5B12	-0.0839	S100A16	0.105	SLC2A1	0.262926	NCAPD3	0.141925	CA12	0.45549	TRABD	0.0960783	UGT2B28	0.507992	DGKB	-0.30749	PIK3R1	0.104183			SETMAR	1.0979	EYA3	1.14	SLF2	-0.636961	OR10H2	0.141415			G3BP2	-0.126403	KRT17	0.618063	TSSC1	-0.0864633	FAM138C	-0.105581	SERPINB2	-0.0258118	TRIM32	-0.422276	18q12	-0.351825
ADCY3	-0.263	C8orf33	0.205	SPTA1	0.162448	RRP7A	0.63261	BICDL1	0.315172	WDR36	0.564912	ZNF534	0.328855	ARFGEF2	-0.253777	INSL5	0.111052			SYNCRIP	0.740069	FBXW4P1	-0.737	HTR1B	0.417113	BRD4	-0.173014			LYSMD2	-0.0855313	THOC3	-0.452986	STOML2	-0.115466	FAM138B	-0.105581	DDX50	0.0177786	AP2B1	-0.319754	ERVWE1	0.343163
TPD52	-0.12	LCE1E	0.134	BANP	-0.208575	RBMS1	0.292459	PSRC1	-0.354784	IL4	0.12293	LOC493754	-0.359735	SLC25A20	0.150331	TMEM130	-0.114182			BBS12	-0.743223	ATP6AP1	0.534	USP47	-0.419286	EID3	-0.325476			EIF5	-0.100346	PHACTR3	1.29052	C1QB	-0.198591	FAM138A	-0.105581	ADM	0.0214169	PTPRR	-0.587348	AF072506	0.343163
TPTE2P6	0.0979	JAML	0.245	KIAA2026	-0.140956	PFN1	0.217034	OVOL2	0.963971	PPME1	-0.453293	ARCN1	-0.453429	MKS1	0.134819	VWA7	-0.0889039			DEFB108B	-2.28244	BARD1	1.4	SFXN3	-0.648	ATP2C2	0.165929			TRNT1	-0.190526	KCNAB2	0.667871	NARS	-0.120321	FAM138F	-0.105581	MSX1	0.037094	ACACA	-0.27351	CXCR5	0.348794
BCAS4	-0.124	PLXNA4	0.116	RHOQ	-0.269582	CRAMP1	-0.165494	LOC105371622	0.307082	TIMM17A	-0.628335	SNX4	-0.487589	WTAP	-0.330157	INTS5	0.0812052			LOC101928476	-1.01918	VCAN	0.956	SFRP1	0.478061	ZNF585A	-0.241182			ATP6AP1	-0.0881722	SLC25A10	0.545292	MIR423	-0.0885418	MIR4683	-0.102687	THYN1	-0.0680522	ASAH2B	-0.562438	BC110352	0.348794
IL15RA	0.0936	C4orf32	0.214	DAB2	-0.485059	SLC10A7	0.211158	NDUFB6	-0.252424	KIF2B	0.0811418	GPR88	1.13308	DKKL1	0.216786	CPNE5	0.135144			SLC35F5	1.19297	TSPAN33	0.787	GRIK2	0.295275	THOC6	-0.300376			MYO1F	-0.0915522	RANBP6	-0.595077	ARG2	-0.20767	FZD8	-0.102687	COPS6	0.0225312	RWDD2B	-0.476592	ZNF573	0.254674
SELK	0.264	SFT2D3	0.151	BTNL8	-0.142303	SYT7	-0.161072	MOGAT2	-0.872288	GIMAP6	0.14111	GZF1	-0.968027	RPS10	0.114173	TAF9B	-0.138831			ADRA1A	-1.47237	CORO2A	0.616	CEP89	0.203596	ATP6V0A2	-0.251866			RNASEH2B	-0.137662	FLT1	-0.410373	NPRL2	-0.0781551	LOC101929368	-0.180998	C1orf162	-0.0467351	SRXN1	-0.573376	BC064962	0.254674
GPR150	0.0944	MUC4	0.16	CACNA1E	-0.141137	TRAP1	0.245119	C12orf65	0.356588	MMP25	0.0853746	WWC2	-0.700021	TERF2IP	-0.158284	LOC100419773	0.191385			LINC01272	1.94103	GNAL	0.565	CHIA	0.328524	SDCCAG3	-0.139505			BTBD6	-0.0837211	SLFN14	-0.56851	MYO1F	-0.119053	FKBP1A	-0.180998	AIG1	0.0279281	NDNL2	-0.359808	RPL41	0.596283
SH3KBP1	-0.25	ARAP1	0.285	RAB3GAP1	-0.241392	CEACAM4	0.132351	PMEPA1	-2.02552	LCN10	0.108493	HSD17B11	0.897366	POLR1D	-0.243727	CDADC1	-0.0975141			MAGI3	-1.64157	ACTN3	0.656	PDE5A	-1.12162	CASP10	0.166408			PEX12	-0.108508	PDCD7	-0.369635	COPA	-0.0989088	LOC101928818	0.116142	PLEKHA8	0.0325126	KLF15	0.537876	12q13	0.596283
SARS2	0.256	KLF14	0.11	KRTAP13-2	0.113618	RASL11B	-0.204446	NAIF1	0.34531	OR4D2	0.120323	HCRTR2	0.253862	BEX4	-0.264752	KIFAP3	-0.0881798			LOC93444	-1.27162	MAGI2	0.77	DUSP15	0.333179	ZNF239	-0.219108			ASPN	-0.089373	SEPP1	-0.487917	TLR10	-0.141156	PWRN1	0.116142	LIPF	-0.0445714	AC073218.2	-1.04501	BC017820	0.596283
RNF121	-0.178	FARS2	0.186	OPA3	-0.303131	SPEM1	-0.199536	CDIPT	0.273131	PPA2	0.483944	C11orf58	0.438155	KCNH4	0.165189	UBQLN2	-0.0799592			SERINC2	1.85343	BARX2	0.49	STK38	-0.834159	CHMP4B	0.476371			VPS52	-0.121842	ADAM21P1	0.439928	POMK	-0.144563	SNORD50B	0.239825	ATP1A3	0.0517855	DNM1	-0.997835	KIAA0776	0.244136
RRN3	-0.221	GYG1	0.342	PCDHA12	0.101351	CKMT1A	-0.169338	UBR4	0.552772	RNGTT	0.477121	RFX5	-0.96262	GRSF1	-0.377029	PCID2	0.123092			UBASH3A	1.94085	ZFHX2	0.718	IQCF5	0.345742	RNF146	0.437574			FGFR3	0.115755	LOC101929054	-0.515194	PSMA4	-0.193859	SNHG5	0.239825	CNR1	-0.0699289	ACHE	-0.620552	BC036379	0.244136
MT1X	0.229	LRP2BP	0.11	KBTBD11	-0.469702	EPHX1	-0.188604	ARF3	0.324776	EDC4	0.280822	COQ6	1.38472	SVIL	0.110451	TRUB1	-0.10196			OR10H2	-0.904442	GM2A	0.488	CEP164	-0.442875	IMMP1L	-0.310589			RASA1	-0.0925418	INTS6	0.347645	DPAGT1	-0.0985898	SNORD50A	0.239825	CHST3	0.0237291	C11orf10	0.678425	SLC7A5	0.187028
WDSUB1	-0.214	ZNF575	0.117	CHI3L1	0.136633	PTGIS	-0.183468	TMEM204	-0.40851	MAGED1	-0.229676	LNPEP	0.946045	LZTS1	0.153539	ATL1	-0.161047			NAV2	1.50197	VSTM2L	0.439	SIRPG	0.319099	TMEM185A	-0.254382			CREBL2	-0.15313	ADD3	-0.846856	DGKG	0.144613	RGPD2	-0.133535	CDC14B	0.0308463	MID2	-0.285159	AF104032	0.187028
SCARNA16	0.133	ANKRD23	-0.121	THAP4	-0.12431	PGRMC2	-0.201249	BBX	0.347681	EIF4E2	-0.488323	CLEC7A	-0.160584	GNAI1	-0.455481	ADAM11	-0.109338			TOP3B	-0.742448	CYTH1	-0.375	ZBTB11	-0.726	PWWP2A	-0.144021			UQCC3	-0.112217	SPDYE8P	-0.550826	LRRC66	0.103837	RGPD1	-0.133535	EGLN3	0.0319039	UCHL1	-0.785034	S100A12	0.425596
ZNF320	-0.409	RAD21	-0.32	LILRA4	-0.252927	SLC38A2	-0.314684	CENPI	0.354837	ABI2	-0.274179	UBE2O	-0.796359	ACAD10	0.185153	NAPG	-0.0907326			SHF	1.36309	CEACAM20	0.674	MAPRE3	0.432751	DTYMK	-0.174681			LANCL2	-0.113056	GPC5	-0.45241	DOCK7	0.131007	LOC440864	-0.121236	ACVR2B	0.0246013	ANKRD34C	-0.907068	1q21	0.425596
SH3GLB1	0.185	NUDT14	0.388	GPS2	0.371113	RNASEH1	0.179783	PNMA3	0.473293	RHD	0.116634	FBXL18	1.03821	BIN3-IT1	0.138865	VPS52	-0.153928			LINC01505	-1.52831	MMP19	1.09	LOC100507053	0.211251	ZNF569	-0.238843			CYTL1	-0.079691	LCLAT1	0.580083	SLFN12	-0.0983881	MSH6	-0.121236	OVOL2	0.036137	GOT2	-0.398763	D83664	0.425596
IL10RA	0.317	MRPL24	0.202	RTN4R	-0.143675	PPP1R1B	0.154302	FBXL18	-0.464188	GPR32	0.101113	TMEM40	-0.158604	TM9SF3	-0.184505	WDR7	-0.0718383			PTPRB	-1.92564	ELL2	1.04	CFAP65	0.35525	RMND5B	-0.157931			PLAC8	-0.142493	PTP4A3	-0.412428	TMA7	0.120974	SNHG16	0.141794	CSNK1G2	-0.0344741	NSG2	-0.708325	PKP4	-0.285276
CCDC86	0.227	MAMSTR	0.111	TBX1	-0.134232	SNRPN	-0.236974	SLC2A1	0.437657	BRI3	-0.444745	SPANXN5	-0.207496	TMED2	-0.216737	CACNG3	-0.122663			RCN3	-1.8853	UNC13D	-0.556	STRN	-0.544009	PWWP2B	-0.2139			C17orf75	-0.160673	ARHGAP27	-0.588667	ZKSCAN8	0.0935251	SNORD1C	0.141794	GM2A	0.0219728	MCHR2	-1.00352	BC050308	-0.285276
PPP1R13B	-0.242	NOL6	-0.262	PIAS2	0.121623	MAFF	-0.28766	MUC12	1.1329	BCL2L11	0.119193	C20orf135	-0.238316	PPP3CA	-0.28356	COA3	-0.10526			GNAQ	-1.84082	AQPEP	-0.442	KLHL28	-0.742468	CD248	-0.277838			DHRS7	-0.119077	TMEM184C	0.618009	TMEM18	-0.0963068	SNORD1A	0.141794	FUT5	-0.0291375	linc-ST6GAL2-1	-1.02775	TRIM40	-0.29602
ADD1	-0.242	ANGEL2	-0.278	SRY	-0.119148	FKTN	-0.28873	WDR41	0.898809	TMEM144	0.102745	NUP160	0.434308	LOC101927051	0.213704	C11orf40	-0.0790905			SRRM3	-2.34814	CLU	0.833	AVP	0.349978	PNMT	0.12514			TCEAL7	-0.0771848	MSMO1	0.443665	LYRM2	-0.0731667	GAGE12F	-0.831588	FOXD4L1	0.0490416	AARD	-0.524001	BC060785	-0.29602
INO80D	-0.0888	TYMP	0.466	MBNL3	0.185141	CDK16	-0.130429	DNAJB14	0.260211	OR10G2	0.1308	C6orf211	0.388773	RTN1	-0.230775	SNORD116-28	-0.143611			RGS8	-1.29434	XRRA1	-1.05	UFL1	-0.525103	RBBP4	-0.319766			U2AF2	-0.0986404	LOC102723757	0.527518	SNTA1	0.126559	GAGE12B	-0.831588	GRIK1	0.0210242	FAM225B	0.648296	HIST1H1C	0.285178
AMACR	-0.121	GOLGA6B	-0.317	ERI1	-0.247267	SPATA24	0.17824	POMGNT1	0.359714	BPIL2	0.0951914	HMGB1	0.683603	TASP1	-0.199193	PTPRJ	-0.173745			ATOH7	2.74948	CCDC122	-1.07	PLSCR2	0.212912	CCNB1	-0.220001			FOXRED1	-0.0829349	POLK	-0.482485	KCTD8	-0.0701319	GAGE12G	-0.831588	COQ6	-0.0319659	WSB2	-0.446211	AK290947	0.285178
TMEM263	-0.19	ANKHD1	0.201	SYF2	-0.295061	GLIS3	-0.156489	TRIM4	0.538446	ARPC5L	-0.256299	DCLK1	0.294503	GTDC1	-0.174824	SUCLA2	-0.0953173			CAPN3	-1.6827	C11orf82	1.07	TNS1	-1.45762	LOC101929269	0.17576			TSR3	-0.0491765	UBR3	0.460685	MYOF	-0.167594	GAGE12I	-0.831588	VPS53	0.0333847	WDR7	-0.346043	PSG7	-0.339774
PHB	-0.3	C15orf53	0.155	DYNLL1	0.466944	RNVU1-7	-0.520119	ZNF594	-0.683384	BRD2	-0.416546	ADAM7	0.157801	RIMS1	-0.331152	DEUP1	0.0905665			PLSCR1	2.9364	MSH6	0.777	TTC7B	-1.22915	STAU2	-0.163553			EIF4H	-0.0667401	STEAP4	0.52387	LGR4	0.157456	GAGE7	-0.831588	KCNH5	-0.0418021	AC004985.12	0.512655	PSG2	-0.339774
PPFIBP2	-0.28	SPPL2A	0.272	OR4K17	-0.136231	ZCCHC18	-0.171475	CEACAM19	-0.461915	PHF11	0.326795	SMARCD2	-0.176654	CDC27	-0.225734	XRCC4	-0.111099			PRSS50	2.20087	TMEM110	0.45	RIOK3	-0.623525	LIN54	-0.151988			AMPD2	-0.0919075	BBIP1	0.51997	GAPT	-0.0895654	GAGE6	-0.831588	GNG4	0.0504805	KIAA2022	-0.681904	U18467	-0.339774
IDH3G	0.222	SHC2	-0.129	CAMK1G	0.233259	PIP4K2A	-0.408895	PKD1P1	0.912042	RHBDD3	0.144748	TNFRSF1A	-0.175861	CDC37L1	-0.234053	LRRK2	-0.181187			MYLK	1.15996	BCORL1	0.618	MTMR9	-0.29989	GOLGA2	0.172188			SCARNA17	0.062394	CALCA	0.351473	TAPT1	-0.104164	GAGE5	-0.831588	MAK	-0.036747	ENG	0.520907	AK300152	-0.339774
MRPS36	-0.116	COG3	-0.23	NF2	-0.109727	PDE8B	0.170477	PNISR	0.26719	GPR162	-0.482815	C2orf43	0.453863	PTOV1-AS2	0.230519	TTC7A	0.0937923			RNF212B	-0.918265	ACP1	0.8	AQR	-0.48143	C19orf52	-0.184119			PTPRD	-0.110318	BAAT	-0.34598	LOC101929469	-0.106304	GAGE4	-0.831588	SNAP23	0.0888946	RP11-867G23.10	-1.00816	PSG1	-0.339774
ACLY	-0.175	C3orf38	0.182	IRGC	0.130405	TRIM9	-0.184892	SLC2A4	0.556601	ESR2	0.0885499	BRIX1	0.861292	DPY19L1	-0.274288	POLR2E	-0.0762964			GLDN	-1.23112	DIAPH3	1.5	TMEM218	-0.518194	DCAF16	-0.313916			FGL1	0.0785489	EIF4E	0.359634	HNRNPAB	-0.064459	SNORA66	0.170613	CCPG1	0.0172543	TMA7	0.434314	BC022316	-0.339774
OR2M1P	-0.11	ZFAND5	0.336	SCAMP5	-0.122486	ACSS3	0.162487	PEX11A	0.730977	SFRS18	0.694303	FPGT	0.792429	ZBTB7B	0.169753	PPP3R1	-0.0728176			PGK1	-1.09268	CBFA2T3	0.467	DSCAML1	0.32304	CD27	-0.320382			SLN	-0.276572	HPSE2	-0.439953	ITGAL	-0.114954	RPL5	0.170613	KRAS	0.0325489	linc-C15orf42-2	-0.343927	BC030979	-0.339774
RPUSD4	-0.211	FRG2DP	0.108	TNS1	0.398499	PTPN22	-0.24134	RALGPS2	0.40924	LOC100130522	0.26488	METTL4	0.910063	PGAM1	-0.175956	COPA	-0.0621613			GAREM1	-2.65808	C8orf48	0.917	UMOD	0.343766	RAB8A	-0.204951			HMBS	-0.0815069	LINC00200	0.687206	CLK4	-0.129757	SNORD21	0.170613	HIPK2	-0.0480407	SLC9A6	-0.572655	AK097672	-0.339774
GK	0.155	CYP4X1	-0.124	U2AF2	-0.195299	N4BP2L2	-0.190397	LOC100996583	0.462808	TUBA1C	0.361538	IKZF3	0.36623	ZNF574	0.177707	RCAN2	-0.12477			C12orf54	2.07492	SHANK1	0.706	LOC286083	0.292355	GFOD1	-0.167103			TNIK	0.078075	IL4I1	-0.51471	WDR74	-0.114115	RPL13P5	0.132693	PEO1	0.0454428	WBSCR17	-0.928396	LOC284344	-0.339774
KCNG1	-0.228	LOC100129550	-0.252	TOX2	-0.340183	PLAG1	-0.17105	LAMA3	0.677511	SORD	-0.561007	RFC4	0.458373	GUCY1B3	-0.340747	C3	-0.357433			VTCN1	-0.906743	THOC6	-0.564	NT5DC2	0.392473	LOC101928963	-0.240708			A2M	-0.155287	CD34	-0.595707	TLCD1	0.142757	LRRC23	0.132693	CCNL1	0.0523356	ZIC1	0.546405	C8orf41	0.219335
ADAT1	0.164	MIR586	-0.11	MIR1224	0.213411	FIP1L1	0.228767	KLRC3	-1.04581	STARD7	-0.293485	SLC35D3	0.215196	ACAT2	-0.205793	TIA1	-0.0944192			LOC441178	-1.75328	HIST1H2AG	1.2	HNF1A	0.257337	PANK2	-0.166033			STARD7	-0.0705121	ZNF491	0.595105	SERINC3	-0.124219	MGC57346	0.115887	RFC1	0.026632	ATP2B1	-0.664582	8p12	0.219335
PET100	0.218	SAMD12	0.112	MASTL	0.148708	COIL	-0.150872	TBX1	-0.884204	CD300LG	0.0833023	C16orf53	-0.70387	YBX3	0.252722	TXNDC15	-0.127114			SCN2B	-1.72917	ITPKB	-1.1	IRGQ	0.303802	RFX4	0.131292			UQCC2	-0.08734	HIST1H2AH	-0.288672	MT1F	0.223621	CRHR1-IT1	0.115887	G3BP	0.0204196	STOML1	-0.552182	MAK16	0.219335
RBM4	-0.104	TRMT2A	0.144	SLC5A12	0.110084	KIAA1024	-0.157843	LOC105372762	-0.782318	SPAST	0.459797	ZNF527	0.870288	ATRNL1	-0.423136	KLHL18	-0.0863572			FAM186A	1.63687	EMD	0.608	FBXO42	-0.291026	RHOQ	-0.280416			CD163L1	-0.0770712	TBC1D22B	0.512659	TNFSF4	0.10788	RILPL1	0.15902	ENTPD4	-0.0786656	GSTM2	0.532236	BC066935	0.219335
ZMYND11	-0.248	SREK1	-0.257	INPP5E	0.291202	TGIF1	0.161298	CAPRIN1	-0.208652	PFKP	-0.182198	TIMM16	-0.415804	PRSS53	0.163062	CAPNS1	-0.105794			PLN	2.88292	C6orf89	0.419	LINC01271	0.288707	CEPT1	-0.183159			TYW3	-0.111972	PKN3	-0.71387	LACE1	-0.0787726	SNRNP35	0.15902	FZD4	0.0282183	KIAA1191	-0.338276	BC050528	0.219335
GRHL2	-0.0935	FOXN3	-0.145	DTYMK	-0.130938	SPATA20	-0.556787	OTX1	0.714554	KIAA0141	0.252748	JARID2	-0.274596	GUF1	-0.154424	PSMD4	-0.0920871			FLT3LG	1.10399	ZNF706	-0.716	TIMP2	0.451844	VARS	-0.36248			GTPBP8	-0.111858	LDLRAD3	-0.418353	CACNA1C	0.140644	NPIPA5	-0.185378	TOR1AIP2	0.0335122	PITHD1	-0.419302	C17orf87	-0.338554
USP3	0.157	TMEM132C	0.146	SIN3A	0.18311	ITCH-IT1	-0.442361	MPRIP	-0.310913	C22orf40	0.34157	KLHL2	0.411601	PRPF31	0.185358	SPTBN4	-0.076295			UG0898H09	2.28254	TIMM10	0.746	FBXO7	-0.598353	TSC22D1	-0.267558			YIPF5	-0.101878	MROH1	0.402722	STAG3L4	-0.132112	NPIPB5	-0.185378	CCL13	-0.0475159	CNNM1	-0.803312	AY358809	-0.338554
B4GALT5	0.252	PMVK	0.176	PANK3	-0.137807	ZNF878	-0.173954	AP1S1	-0.306174	SMC3	-0.510172	TYW1	0.750893	SIGLEC8	0.156872	CBX7	-0.106326			CSRNP3	3.03918	MINK1	0.535	LINC00895	0.312096	APOL4	0.176584			OLR1	-0.275959	GNPTAB	0.420929	FAM98C	-0.0606872	NPIPB11	-0.185378	PCGF6	0.0356739	HBQ1	-1.08399	APOBEC3A	-0.331404
UHMK1	-0.248	GFOD1	-0.394	MARCH5	0.151461	XYLB	-0.201968	ZNF85	-0.714881	CLDND1	-0.277776	INSIG2	0.34678	RPS12	0.135282	CTCF	-0.0912312			PKNOX2	-2.00313	RAD21L1	1.2	CRHBP	0.294716	ZBED5-AS1	-0.226931			ATG5	-0.105216	S1PR1	1.74583	LOC400997	0.0930467	NPIPB8	-0.185378	FLJ40125	0.050163	RPS23	0.508876	U03891	-0.331404
WBP2	0.291	BAGE3	-0.101	GPR34	0.333962	ENTPD1	0.307157	ZNF654	0.542827	TTC9B	-0.366104	LHFP	-0.919396	FXYD5	0.139958	MGST2	-0.18333			PF4	1.12876	GABRQ	-0.712	ZNF264	-0.625428	ESCO1	0.471299			DNAJC11	-0.0748459	KRTAP12-2	-0.564208	CLDN14	0.08689	LOC613037	-0.185378	RHOQ	0.0397682	VPS26B	-0.359883	TCL1B	0.2397
MRPS25	-0.287	PSMB9	0.48	YIPF6	0.304037	ZNF705D	-0.144439	SLC1A2	-1.4429	CDK5R1	0.130568	PRSS22	-0.217495	CST4	0.152752	GSTM1	0.274624			GVQW2	-1.8134	RTKN	0.524	FAM26F	-1.08163	BSDC1	-0.167083			AAMP	-0.0649386	ZCCHC18	-0.476907	CRAT	0.0679147	NPIPB4	-0.185378	FGG	-0.043137	HTR5A	-0.866316	AB035332	0.2397
RANBP17	0.0811	MRPL10	0.297	VTI1B	0.312467	CD300C	0.566176	WWC1	0.695333	AKAP5	-0.274893	ETV3	1.00845	RGR	0.211647	GUCY1A3	-0.144674			LOC105369595	-0.832191	ZNF169	-0.619	PHF23	0.286304	ZXDA	-0.235255			EHHADH	0.0830039	CXCR4	0.53604	THEM6	0.0726756	NPIPB3	-0.185378	TEKT2	-0.0308198	NR4A3	-0.724383	TCL6	0.2397
UBXN6	0.329	GIP	0.113	SNX18	-0.149359	TTTY23	-0.128926	RAB3IP	-1.20027	AP2M1	-0.284279	RNF24	-1.43043	ICAM2	0.342512	VLDLR-AS1	-0.0972698			CACNA1H	-1.21535	COL16A1	-0.596	DLX6	0.33116	NMNAT3	0.225442			RBX1	-0.0907203	LINC00323	-0.651119	EHMT1-IT1	0.0856124	FCGR3B	0.146744	TIAF1	-0.062679	FNDC4	-0.475358	AB018563	0.2397
APEX2	0.21	PKIA	-0.301	TAX1BP1	0.269412	SSX3	0.148311	SLC9C2	1.01579	CD74	-0.468355	DLG1	-0.369532	FADS3	0.186167	EEF1B2	-0.0808463			MRGPRF	-1.8895	YWHAH	0.566	ATP2A1	0.353269	SOX12	-0.220958			SERINC1	-0.0712676	ITPRIPL1	-0.47446	TPD52L1	0.18197	FCGR3A	0.146744	HRG	-0.0353089	PCDHGC5	-0.662539	RBM38	0.32062
SERPINA1	0.487	CCDC157	0.121	TRAPPC2	0.206276	LOC105371307	0.147099	SNX24	1.04287	GTF3C1	0.16096	ATAD2B	0.745962	MAP1LC3B	-0.314154	ZYG11A	0.0800299			NRG1	-1.61507	C8orf79	0.579	ESAM	-0.815838	GPATCH1	-0.191082			CLTC	-0.097367	PPID	0.549073	PLEK	-0.185979	LOC101805491	-0.140195	NFIB	0.0380024	OPN3	-0.725356	AF432218	0.32062
CETN4P	0.112	ZNF600	-0.494	CCNC	-0.250644	EIF1AX	-0.426028	FKBP15	0.351828	TRMT61A	0.13852	RGL3	0.370203	RNF6	-0.314504	KIF19	0.0924698			GRIA3	1.69708	C1orf101	-0.861	NSD1	-0.42588	CPA3	-0.722656			SRP68	-0.0901054	ACBD5	-0.646653	MRPL21	-0.114068	TMEM247	-0.140195	ACY1	-0.035785	linc-NUSAP1	-0.422074	C7orf42	0.156521
ARX	0.104	UXT	0.139	C19orf12	0.10091	AJUBA	-0.204926	PAX8-AS1	1.04016	FAM117B	0.481716	ZNF624	0.647316	GOT1	-0.429974	CNPY3	-0.097804			C4orf26	-2.09273	PQLC1	0.538	LOC105373738	-0.443836	NCBP3	-0.184449			CD86	-0.123522	RNF113B	0.562707	PDCL3	-0.107492			DAB2IP	-0.053578	FLVCR2	0.708963	BC012562	0.156521
WSB1	-0.207	HLA-DRA	0.317	CHRNG	-0.0940205	MIMT1	-0.14504	PLCXD3	0.925333	PGK1	-0.454701	TRUB2	-0.453592	EIF2S1	-0.147429	CD53	-0.265441			PLEKHN1	2.13312	SLIT1	0.592	ABTB2	0.332501	VSIG1	-0.315188			SEZ6L2	-0.131207	OPN4	-0.353785	SRI	0.110706			UBE1C	0.0351081	STMN3	-0.767723	C16orf53	0.217223
DNAH12	0.0877	FAM95B1	0.133	KCTD18	-0.152661	MACF1	-0.192594	GREB1L	0.295151	GALNT13	0.51045	OR4K2	0.180388	UQCRFS1	-0.287086	FSIP2	0.113855			LRRC73	-0.689094	PORCN	0.84	KIF26A	0.409052	CPSF6	-0.324246			LZIC	-0.091327	DEFB115	-0.359696	MR1	0.126216			ZNF681	0.0310242	STXBP5-AS1	-0.415333	BC003640	0.217223
GSTTP2	-0.103	TALDO1	0.275	YBEY	-0.102803	PTPN7	-0.176297	LOC101928658	-0.906795	MUC12	0.105241	BCDIN3D	0.666963	PPP2R5E	-0.353852	CDIPT	-0.137426			AVPR1B	0.798269	SLC41A1	0.634	SERPINB3	0.285724	PPP1R3E	-0.18883			FAM133A	-0.127079	MYBPH	-0.75126	SMARCAL1	-0.0708853			C10orf6	0.016572	linc-ERG-9	-0.744626	OR1J2	0.369556
FDPS	-0.22	ITIH5	0.161	WDR4	-0.205921	ACYP2	0.14375	TRIM2	1.17384	SUMF2	-0.547908	MAD1L1	-0.361817	USO1	-0.225552	IFNA6	0.109867			GGT6	1.8787	UBL7	0.439	ZSCAN18	-0.799975	LOC105376166	0.14253			RNF14	-0.0821071	LTN1	-0.540822	EMC3-AS1	0.0984553			PRRX1	0.044542	CDIPT	-0.407203	OR1J4	0.369556
FGF13	0.0689	GSDMC	0.139	VASN	0.129657	FUT6	-0.258128	SLC25A27	0.657957	CD93	0.15685	ARFRP1	-0.348454	FMOD	0.160504	SLC2A6	-0.10806			DYRK1A	-1.63501	CPEB4	0.729	CARD14	0.274702	KRI1	-0.219646			SYMPK	-0.0408841	BDH2	-0.600474	TRPC3	-0.154587			CBLL1	0.0252275	SDR16C5	-0.856216	AK123016	0.369556
FOXN1	0.0836	AGPAT3	0.161	PON3	-0.121415	LOC105379362	0.174172	GRID1-AS1	0.53593	BIRC5	0.0961162	LMBR1	0.680336	TSN	-0.242369	IDH3B	-0.080908			INIP	1.65635	CRHR2	0.523	MRPS30	-0.35599	MCM5	-0.235824			LINC01116	0.0785312	SEMA5B	-0.415599	DHRS2	-0.0855444			PGLYRP2	-0.0426281	RP11-731D1.3	0.916313	KLRG1	-0.672629
ZNF281	-0.202	ZZZ3	-0.212	ETV5	-0.1174	MSLN	0.142476	PCMTD2	0.367216	DNAH9	0.0887277	ACTG1	-0.1445	PRDX3	-0.223456	CMAS	-0.0903963			ZSWIM1	-0.770497	HOXD1	0.81	RPS14	0.311674	RHOBTB1	-0.705653			GNL1	-0.0748531	WFDC6	0.402053	GSTM1	0.305666			SSBP3	0.0597197	MDH1	-0.624189	AK301367	-0.672629
MRPL24	0.158	IL36B	-0.131	EYA4	0.0990362	OTP	0.172132	PRPSAP1	-0.644839	HSH2D	0.132658	EIF5	0.234191	CCNJL	0.213115	NUPL2	-0.112095			CAD	-1.37322	DNPEP	-1	PIP	0.280566	RLN2	-0.282151			COPS8	-0.0964233	DEFB113	-0.569625	CCDC146	0.123642			ZA20D2	0.0206301	URGCP	-0.297859	TBRG1	-0.225117
LINC01152	-0.119	SPRED2	-0.107	SIAH2	0.507192	CRIPAK	-0.236018	REG3A	0.677647	SLC43A3	0.0876761	SYCE1L	-0.207377	PNMA2	-0.228474	OOSP2	0.104323			TMED6	2.11065	UBE2K	0.605	TMCC1-AS1	0.255321	SKIV2L2	-0.170768			SLC13A4	-0.321921	STK26	0.410639	ABCF1	-0.0608937			HDCMA18P	-0.0414363	RP1-97G4.1	-0.672078	SIAE	-0.225117
RPL27	0.127	RNF135	0.303	MIR767	-0.136926	CSNK1A1	0.187383	PFKFB1	0.346974	LRRN4	0.124319	PTGES3	0.345192	MATN4	0.221303	PAK1	-0.123242			PPP1R3C	0.643931	RAB40B	0.799	BTBD7	-0.617969	PSMF1	-0.193177			TSPYL4	-0.108562	EXOC6	-0.338762	SRD5A3	-0.140798			SAMD7	-0.0558339	SPINT2	-0.685688	11q24	-0.225117
SDHAP1	-0.104	PDCD4	-0.504	SOX5	0.139209	PTGER2	-0.303773	CLUH	0.449424	OR56A1	0.131786	UROD	-0.660098	DISC1	0.143034	SLC25A16	-0.080232			TACSTD2	-1.32373	GUSBL2	-1.06	WTAP	-0.589017	LOC101927402	-0.2181			LILRA1	-0.139035	EZH2	-1.04622	RPL38	0.059647			MGC34646	0.0590093	RHBDD2	-0.599597	BC041043	-0.225117
LLGL2	0.0912	H3F3A	0.25	DMTN	0.548334	HCK	0.541422	TTL	-0.27619	LSM14A	0.34176	CSNK2A1	-0.84486	M6PR	-0.249387	C11orf65	0.0968318			MRPL57	0.914857	C6orf136	0.498	B2M	-0.952052	MSTO1	-0.192614			RNF170	-0.172327	MTRF1L	0.450844	NR4A2	-0.227178			GPR109B	-0.0455948	PNMA2	-0.739679	BC068450	-0.225117
SNORD12	0.101	TMEM101	0.21	PSMD12	0.183326	ZPBP2	-0.204647	CXCL2	0.829776	KIAA1644	-0.46973	MUC21	-0.25679	PRX	0.174105	RAB1B	-0.105852			USP29	-2.0113	MVD	0.585	CCR10	0.620929	PPP2CA	-0.207079			KYAT3	-0.1128	GRB2	0.446944	MRPL24	-0.10582			TFDP2	-0.0335968	RNF150	-0.573458	E2F8	-0.223906
LINC00853	0.154	FBXO43	0.104	CRNN	0.149402	IL6R	0.224345	TMEM44	-1.05384	MDH2	-0.204998	MAGT1	0.189481	RAB11FIP2	-0.22308	FLOT1	-0.0989458			PRDM1	0.810618	GNAI1	0.559	PINK1	0.460687	ELF2	-0.210104			MNDA	-0.0801141	CCNG1	-0.389949	SLITRK2	0.090293			ADD3	0.064966	SZRD1	0.334132	AK292688	-0.223906
BCLAF1	-0.162	RNMT	0.209	SLC22A10	0.115486	STAMBPL1	-0.3026	LINC00473	0.693256	DOCK9	-0.448286	MRPL35	-0.660637	TRHDE	-0.345356	IPO8	-0.121155			HS3ST4	-1.68541	DEPDC1B	0.49	MBNL1	-0.348983	ABCF1	-0.187655			LPAR3	0.175926	TTTY21B	-0.358109	SNORA38	-0.0927629			FLJ39531	-0.0375134	CLTC	-0.448162	NDUFS5	0.367721
SNORD84	0.131	HTR3C	0.115	RWDD2A	0.175115	EIF3J-AS1	0.163156	C1orf56	0.241078	AKAP7	0.136628	ATP9B	-1.22066	BEX3	-0.130228	TMEM138	-0.0759178			UBASH3B	-1.45716	SFRS2IP	-1.21	SH2D1B	-0.9996	MRPL4	-0.239593			SLC25A6	-0.061754	PABPC3	-0.378708	OR8S1	0.092035			TRPC6	0.0253727	RASSF7	-0.605817	AF020352	0.367721
SPAG16	0.0889	KRT222	-0.113	PIM1	0.421145	GRK3	0.149178	NUDT17	0.409509	AKAP11	-0.13902	LAS1L	-0.422244	NDN	-0.261749	TOX2	0.101607			ZNF254	1.01626	TAS2R4	-1.6	ZNF771	0.387942	SUDS3	-0.322123			TIMM8B	-0.185263	TAOK2	0.738604	GPR143	0.119567			RAD18	0.0501355	ZFP36L1	0.632204	AK223309	0.367721
RPL10	0.115	NSUN6	-0.182	HIST3H2BB	0.106778	RNA18S5	0.417205	BEND7	0.581015	RWDD1	-0.30571	DAG1	-0.490391	COMT	0.1481	BTG3	0.160461			FBXL20	0.751136	ZNF585B	-0.736	IL2RA	0.428634	ITPR2	0.240011			CPT1A	0.116053	CD2AP	0.589279	ZKSCAN7	-0.0862979			C20orf70	-0.0337767	CXorf28	0.911937	RPL10	0.367721
HPS1	0.252	CHN2	0.163	DDX3X	0.411522	PDRG1	-0.181949	NR1D2	0.334756	FAM179B	0.452421	DACH2	0.853046	AZIN1	-0.315584	AKR7A3	0.100726			EFCAB6	-2.07924	LRP12	0.958	HIVEP2	0.27124	IGLV1-44	-0.619871			GAPDH	-0.0704085	ID4	-1.51386	NLGN2	0.0815432			OR7A5	-0.0289601	RAB37	-0.616178	ABCA7	-0.319987
PCNT	0.182	GALNTL6	0.12	UBL4A	0.222187	LYN	0.468284	HPS4	0.290064	LARGE	-0.379631	MS4A8B	0.172986	METAP2	-0.214456	HNRNPCL2	0.0921636			ARPP21	2.13066	HIPK1	0.506	SYNPO2	0.361464	POU6F1	0.138436			FAM104B	-0.0584235	GRIN2B	0.430701	SLC2A14	-0.100621			TBX21	0.0739152	EEF1A2	-1.00929	AF328787	-0.319987
DLG2	-0.11	HDGFL1	-0.142	SLC12A2	-0.197199	DCAF6	-0.36978	EML2	0.713336	MYPN	0.083744	SLC7A1	0.623416	ARMC1	-0.37407	UBR5	0.0620911			LOC100130502	-1.38304	SOX6	1.69	FBXO10	0.293446	FRS2	-0.22062			GPKOW	-0.0785864	MIR635	0.878875	OR12D3	-0.072729			EXDL2	-0.0488809	NLRP4	1.99445	POLR1E	0.253928
XKR7	0.0788	ZNF320	-0.518	FAM86JP	-0.123038	SNORA71C	0.178623	ZMYND11	-0.888088	TBXAS1	0.122482	ERLEC1	0.378869	PTPRR	-0.292733	ARMCX2	-0.108238			EPHA5	-0.972749	CCDC37	0.816	GNB5	-0.647706	ANAPC16	-0.209543			DTD1	-0.0722936	RAD51AP2	0.427438	ITGB1BP2	0.086263			C8orf34	-0.0501175	DCSTAMP	-1.55958	AK225050	0.253928
FERMT3	0.319	ANXA8	0.126	UNC13A	-0.12899	SGO1	-0.200582	TRPM3	0.507367	MED12L	-0.672631	C12orf23	0.689147	ADAM23	-0.386295	AFF2	-0.130449			INPP4A	-0.890197	DAGLA	0.8	TMEM106B	-0.652124	PTPMT1	-0.187689			XRCC6	-0.133426	ZNF335	-0.837194	PPP1R1B	0.103729			APPBP2	0.0383444	KCNH5	-0.644864	MYC	0.238667
TMEM35B	0.167	C16orf70	0.18	BAX	-0.121757	FSTL3	0.14483	CREBZF	0.406965	ZNF836	-0.668549	C14orf156	0.624404	ACADS	0.163143	VSIG10	0.0898176			TRUB1	-2.28631	SDHB	0.543	RBBP4	-0.599363	C11orf57	-0.190702			FN1	-0.187384	RBBP6	-0.813692	SYNCRIP	-0.0757823			LASS4	0.0213808	LIMK2	0.444261	BC000141	0.238667
DNAJA2	-0.135	LCT	0.095	PITPNA	0.162067	SYT3	0.172973	SNTB2	-0.35938	GOLGA4	-0.570344	RPL7A	0.259678	SMS	-0.296511	TMSB15A	0.112776			SOX13	1.29064	MEOX1	0.566	SYNRG	-0.69397	APRT	-0.241264			LSM4	-0.0586197	KBTBD6	-0.827658	CBX3	-0.0614399			PPP2R5D	0.033462	NECAB3	-0.392152	LENG8	-0.279897
ITIH1	-0.125	KRBOX4	-0.191	PRB4	0.12163	DNASE1L1	0.176304	RBMS3	-0.837242	ZP3	0.324366	CEP350	-1.10116	DEK	-0.21084	GAP43	-0.168648			MESDC2	1.26226	RHAG	0.91	ITPR1	-0.668831	STAT3	0.257719			RNU5A-1	-0.165718	BACE2-IT1	0.439058	EIF2B2	-0.085686			SLC16A13	0.0349882	PODXL	0.422247	BC028048	-0.279897
NBPF11	-0.181	ASPHD2	0.206	RNY5	0.250685	MED4	0.373642	ACADSB	-0.379935	MYH10	-0.203892	PDE4B	-1.49017	NCKAP1	-0.166702	G3BP2	-0.0926046			HS6ST3	-2.01125	MYO7A	0.808	HECW1	0.285269	ERG	0.189355			PPP1R21	-0.0780418	PLAC4	0.439058	PTPN2	-0.116324			SYMPK	0.0272567	MDGA2	-0.351089	GJC1	-0.365324
LOC105369266	0.127	SNAP47	-0.254	STON1	0.108417	OR2T35	0.158901	LOC101926943	0.418161	SYT8	0.153928	FDPS	-0.601869	PRKCB	-0.35587	PLRG1	-0.0939086			DPYSL3	-2.00699	TCERG1L	-0.905	MPV17L	-0.538933	HSD17B1	-0.223222			TKT	-0.0414043			SDC2	0.152762			CPNE7	0.0274818	PPP1R9A	-0.349639	AK124339	-0.365324
STX6	-0.194	PARP4	0.306	CD69	0.762684	USF3	-0.209465	ITGA11	-0.839608	TSTA3	0.31162	RNASEL	0.233962	CXorf40B	-0.213025	VPS36	-0.0856881			DNAJB8	-2.25825	INTS1	0.631	SLC7A8	0.419281	PRKCQ-AS1	-0.242324			TFCP2L1	0.113434			IVNS1ABP	-0.16484			OSTN	-0.064684	SIK2	-0.259716	ZNF549	0.249135
CFAP97	0.139	DRG2	0.221	ARL17A	-0.306427	PLN	0.188575	GPR82	-1.17662	ARL6IP4	-0.411227	GPBP1	0.871171	MRPS33	-0.184704	TPM4	-0.149265			BMP5	3.04894	ZFAT	-0.729	IZUMO4	0.391161	GPATCH4	0.215277			MGST2	-0.161421			SERTAD2	0.111201			PIGT	0.0316983	GPX4	-0.409589	BC060863	0.249135
CBX6	-0.448	TJP2	0.157	FAM21C	-0.151046	APLF	0.212867	TLR7	-1.00262	PROX2	-0.182292	TMEM50A	-0.818354	ATP6V1D	-0.330758	AIF1	-0.20465			THSD7A	2.40702	GRASP	0.475	WT1	0.332681	TWISTNB	-0.23699			VAMP8	-0.112733			GPR82	0.0634197			C8orf31	0.0837044	UPF3B	0.435807	CD83	0.252569
LOC441601	0.0678	XYLB	-0.128	RBM3	-0.318529	CANX	0.208083	ST3GAL4-AS1	-0.219563	PDCD4	0.283176	DLG3	-0.633135	CNKSR1	0.126567	DHX35	-0.100699			ABCC13	1.99854	SENP3	0.957	LRRC6	0.723667	FIGNL1	-0.335621			C11orf68	-0.0937259			CD300C	-0.0744541			NT5C3L	-0.027025	SMAGP	0.534347	BC030830	0.252569
ISCA1	0.195	SLC25A52	-0.109	WHAMM	-0.340867	H2AFB2	-0.131673	GVINP1	1.09068	HDLBP	0.66752	FMN2	0.881066	OPCML	-0.26718	C20orf85	0.0990009			CCNG2	-1.70945	ANAPC2	0.462	TXNL1	-0.632104	CHIC1	-0.31907			VPS72	-0.0912168			LRP5L	0.070397			NCOA2	0.0350558	BHLHE41	0.589674	AK126772	0.252569
ARHGAP36	0.0917	JAZF1-AS1	-0.122	MIR449A	-0.132353	GCNT2	0.208726	DST	0.401292	SLC26A1	0.10373	ATG16L2	0.471477	CDK17	-0.23566	CCDC158	0.165785			CADM4	1.99597	MRPL16	0.736	TMPRSS11D	0.346539	LAMC3	0.147352			PRDX6	0.109991			HSBP1	-0.113167			HOXC8	0.043133	PID1	-0.423814	LOC100128517	0.252569
CASP7	0.131	SNORA71B	-0.137	SRSF2	0.228888	MIR1302-7	-0.173055	CRISPLD2	-0.600472	SLC1A3	0.106218	SLC25A3	-0.281145	KHNYN	0.138605	PCLO	-0.115799			BRSK1	1.99393	SLC1A5	0.715	ARIH2	-0.352157	SLC18B1	-0.287753			TRMT12	-0.127851			PSMA7	-0.0724946			MAPKAP1	0.0197689	ZFP36	1.22573	ZNF137P	-0.366616
EXD3	0.106	PLVAP	-0.125	FCGBP	0.146753	ZXDC	0.158054	CFAP221	0.438039	PINK1	-0.275447	NUDT13	0.490777	ZNRF4	0.123179	C5orf56	-0.108797			ATOH8	-0.816829	ESAM	0.558	LPAL2	0.259156	ANXA2P1	0.178067			FAM189A2	0.167427			MSR1	-0.168615			FGF14	0.045137	NEFL	-1.10206	U09414	-0.366616
CTSH	0.301	VCX3B	0.114	HSFY2	0.125343	BMP2K	-0.242679	SLC30A2	0.532082	COQ10B	0.230428	SLC5A3	0.743463	SELENBP1	0.246622	ASPN	-0.126464			FAAP20	-1.5878	LTBP1	1.44	LOC401463	0.454232	ARMC7	-0.209101			DCHS2	0.129093			AKR1A1	-0.110282			SRP14	0.0266842	CCNK	0.311022	CEACAM4	-0.373645
EGR3	0.16	KIAA1683	-0.254	DTX4	0.104261	GSTCD	0.177732	ARHGAP29	-0.76665	PUM2	-0.271729	HBEGF	0.397913	TCF4	-0.278898	MYL3	0.0884129			ALOX15B	1.54045	DYNLL2	0.435	LCP2	-0.803334	SMCR8	0.319917			CYP2B7P	0.111438			TAF5	-0.0851583			NEURL	0.0199575	ATP6V0A1	-0.409005	D90276	-0.373645
DIP2A	0.133	TRIM11	0.183	RNF214	0.258491	SRC	0.322044	LOC101927196	0.916223	CSRNP1	0.457772	ULK3	-0.269782	EMID1	0.146371	EFR3B	-0.0972128			ST8SIA6-AS1	-1.93323	CCDC52	-1.21	CSPG5	0.370206	ABCE1	-0.231039			PYROXD1	-0.219819			CDH4	0.077301			XPA	0.027454	INPP4A	-0.604874	CPA3	-0.716089
MBNL2	-0.182	MECR	-0.112	DENND5A	-0.176179	GPR27	-0.179433	LOC101929536	0.312465	CAMSAP1L1	-0.27799	MYO1E	0.650886	PRR14	0.108434	TBC1D8B	-0.112111			GSTCD	-0.806222	DGCR8	0.441	PSMD6-AS2	-0.605354	TASP1	-0.269379			CHID1	-0.0655769			FXYD5	-0.0975706			SMARCA3	0.0239096	CTD-2206G10.1	0.498673	BC012613	-0.716089
JPH4	0.105	FGF14	-0.101	TUBA1A	0.410456	EXT2	-0.216021	LINC00301	1.014	NFIX	0.166955	NDUFA11	0.576922	PPM1H	-0.292648	RRM2	0.128434			HIPK1-AS1	-2.20861	KDM4C	-0.765	KCNA7	0.279568	NOTUM	0.185812			PRSS3	-0.138699			POU3F2	0.0959274			C4orf17	-0.0385176	RIN3	0.60035	C20orf3	0.255518
PHF3	-0.219	GTF2H5	0.241	CHAF1A	-0.179937	CFL1	0.217073	BARHL1	0.870514	ERF	0.118527	RAB37	-0.887542	LAMB2	0.187077	OAZ1	-0.133946			GMDS	2.40716	CR1	0.815	FECH	-0.427902	LOC102724362	0.153689			TAF9B	-0.0914507			RUVBL2	-0.0925399			IMPG2	-0.0293431	SAR1AP4	-0.645545	BC003501	0.255518
GOLGA5	0.19	HIGD2A	0.283	IL23A	0.163546	SLED1	0.179776	RRAGC	0.622831	ACOT8	-0.242918	C9orf41	0.750272	ASIC1	0.158768	MAP3K13	-0.149043			ALDH1L1	-0.980316	SERTAD3	0.504	LINC01547	0.291664	KLHL36	-0.17481			CXCL10	-0.312348			ZCCHC10	-0.0772985			TAS2R5	-0.0524945	COPG1	-0.332721	MT1M	0.304079
BOD1L1	-0.125	MIR129-2	0.141	JDP2	-0.498362	CEP85L	0.219589	TAS2R40	0.414305	ACYP2	-0.268711	TADA1	0.790484	PNO1	-0.216397	MMS19	-0.077802			DNM3OS	2.73021	CRAT	0.519	HNRNPH1	-0.423548	PPP1R8	-0.128284			ALDH6A1	0.113981			NMNAT3	0.0787565			SLC9A3	0.031172	CCDC110	-0.604283	16q13	0.304079
RFC4	0.14	PDCD10	0.137	BAG4	-0.272576	LOC729609	-0.134619	PHKG1	0.660116	HIC2	0.126677	RYBP	0.96992	PDCD6	0.147099	SLC6A12	-0.122429			LOC101928902	-1.75747	KIAA1468	-1.11	CHDH	0.3106	POLR1E	-0.20319			SNUPN	-0.132677			INTU	0.119752			ZNF653	0.0344373	LARGE	-0.59643	BC028280	0.304079
LMX1B	0.0947	SEMA3B	-0.107	C3orf70	-0.134371	LSS	-0.162807	C1orf168	0.848976	EIF4E3	-0.497492	GNG12	0.386593	GGT5	0.186547	NMS	0.114298			HMGA2	-2.23374	ARHGEF11	0.569	CLDN23	0.363133	HYOU1	-0.262146			CASP4	-0.148939			MEMO1	-0.0440886			OR1N1	-0.0292227	NUDT4	-0.593044	BC103840	0.304079
CDK5RAP1	-0.0772	SBK1	-0.325	PAX7	0.148185	MRM1	-0.159463	ZNRF1	-0.280832	FYTTD1	-0.175737	HMBS	0.614502	PTPRCAP	0.208875	INPP5D	-0.151467			ABI2	-1.42412	MYBPC3	0.704	TEX13B	0.254779	GEMIN2	-0.357543			USMG5	-0.10088			NDRG2	0.159128			PSG1	0.0242836	RP11-297M9.2	-0.87302	MT1P3	0.304079
CCP110	-0.188	TRIAP1	-0.224	SLC6A14	0.134674	HDGFL1	-0.140671	MID1	-0.295522	ZNF311	0.0899555	UEVLD	0.878644	GABARAPL3	0.163049	PPEF1	0.121742			ANXA1	-2.63304	NEK1	1.87	GALNT13	0.229708	PRPF40A	0.277836			UBTF	-0.126461			MBD5	0.073632			ROD1	0.0231235	linc-TBC1D8-1	-0.564123	ADAL	0.304653
PSMB9	0.383	AOAH	0.265	COL5A3	-0.148837	SLC30A7	-0.197098	ZFP92	-0.283959	POU2F1	0.195689	FES	-0.274758	CLDN6	0.252293	EID1	-0.0793135			TDRG1	-1.5491	SLC34A2	0.994	KLHDC1	-0.413776	WDR13	-0.180314			GABRA1	-0.181095			LYPLA1	-0.121234			NR2F1	0.0367894	AE000661.37	-0.705161	AK298870	0.304653
USP54	-0.0919	FOXD4L1	0.122	AURKC	-0.111499	STRIP1	0.212957	FOXC2	-0.741937	CREM	0.379709	TNFAIP8	0.375436	CYP2D6	0.242506	LEP	0.102352			FRMD5	-1.61022	CLIP2	0.702	PPP1R3E	-0.573352	CETN2	-0.170493			NFYC	-0.128637			KIAA0368	-0.0730474			40058	0.0278292	TOLLIP	-0.663516	OR5L1	-0.31221
LPCAT3	0.206	FYTTD1	-0.234	ATP5G2	0.154928	C17orf82	0.151756	EIF2A	0.376153	SRPK2	-0.202907	SYTL2	0.785894	MYT1	0.11791	EPHA7	-0.174995			MAL	0.902411	DPP3	0.586	S100A10	-0.628082	PAPSS2	-0.424343			YIF1B	-0.0651502			MPDU1	-0.0885859			ADH7	-0.0457936	AK5	-0.411329	OR5L2	-0.31221
RBM15	-0.174	HEXB	0.238	ZNF23	0.192699	COPS3	-0.153878	UBE2NL	-0.294995	PIF1	0.212223	PPP3CB	0.164591	HCCS	-0.276233	MADD	-0.0725905			ADAM28	-2.15886	SLC22A15	-0.379	ELN	0.307853	FARS2	-0.304053			C21orf2	-0.0488091			ZNF678	0.106599			CD38	-0.0589546	GPA33	-0.954067	BC109249	-0.31221
CBLC	-0.0913	CENPP	0.0906	LARGE1	0.178666	CYP27C1	0.153386	DCAF4	0.358391	IL2RG	0.100653	IFNA6	-0.146515	SMARCA4	0.157452	RABEP1	-0.0599585			ICA1	-0.854128	C19orf33	-0.591	OFD1	-0.879971	CTBP2	0.169231			CCND1	-0.0710696			MIR30C2	0.139252			NAT10	0.0193296	ARL8B	-0.37503	C7orf70	0.204114
THRA	0.113	LRRC37B	-0.255	TOPBP1	-0.29233	KLC2	0.133757	FABP2	-0.778024	HK2	0.164358	C5orf28	1.13566	ABCA5	-0.169459	STAG3L4	-0.185471			NCKIPSD	1.64763	KIF15	1.64	LOC100130938	-1.24851	RTN4	0.122923			FUT11	-0.107007			ANAPC16	-0.0961671			RUFY3	0.0298569	TENM1	-0.448707	AF533707	0.204114
TRAK2	0.328	RNVU1-18	0.71	PDZD3	-0.137727	NEK11	-0.196154	NAA25	0.401457	PDE4DIP	-0.328635	FEZ2	0.444257	EID1	-0.301825	LRRC2	-0.23039			CATSPERB	-1.0607	CCDC129	1.24	RREB1	-0.502042	NHP2	-0.221811			HCK	-0.10407			KLF3-AS1	-0.13549			LIN7A	0.0512889	SGSM1	-0.686128	C9orf51	0.204114
USP15	-0.16	FIBIN	-0.109	PRKACA	-0.160853	DHRS12	-0.204636	DTYMK	0.971263	BCL3	0.115902	CD46	0.673237	SNAP25	-0.594906	SMARCB1	-0.0938668			SCOC-AS1	1.4494	NRGN	0.855	ADAMTS2	0.303647	LARP1B	-0.258877			TMEM230	-0.081607			IL36G	-0.073385			RPL21	0.0294696	NEGR1	-0.676639	EYS	0.262375
BSG	0.532	PHIP	-0.231	DDX19B	0.195088	MECR	-0.166582	LOC100505824	0.815092	PHYHIP	-0.39676	TRMT2A	0.926787	KLHDC10	0.14711	ZNF257	0.0741191			AKR1C4	2.08122	CPB2	0.571	FAM71F1	0.268144	ZKSCAN3	-0.193558			DCTN3	-0.0981495			FAM184A	0.14135			ZNF659	0.020757	MIR541	-1.13085	6q12	0.262375
GRK2	0.0928	ARF1	0.218	GCN1	-0.261905	ZNF493	0.155168	SATB2-AS1	-0.646688	GPR174	0.103219	TCTN1	0.600943	TOPBP1	-0.276562	THNSL2	0.130859			LOC100287015	-1.13517	BEND7	0.852	MMP14	0.348266	USP31	-0.388909			ACSL4	-0.0963026			CYP51A1	-0.128805			SHC1	0.0354032	RASL11B	-0.821416	BX537914	0.262375
PFKL	0.215	TMEM67	-0.133	GALNT5	0.0984225	USP33	0.249479	TRAPPC3	-0.288309	MAZ	-0.34409	AGFG2	0.382206	DDX31	0.125932	KIF5C	-0.0692702			KIAA0754	1.43297	SGOL1	1.13	NCOA2	-0.586424	SEPHS1	-0.225948			METTL15	-0.169817			PIH1D1	-0.0840517			LOC81558	0.0240982	SNORD115-34	-1.22426	GPR15	1.08799
OSTN	0.0854	PGRMC2	-0.335	STK33	0.131511	LOC283922	0.138472	KCNMB1	0.298595	RPL4	0.132831	FBXW4P1	-0.222405	HUWE1	0.132707	SYNGR1	-0.11048			KIF13A	-1.46759	TMEM9B	0.75	NUB1	-0.730063	RASGRF2	-0.312816			POMK	-0.132064			RFT1	0.118447			ZSCAN1	0.0187069	LRWD1	-0.418545	BC101779	1.08799
TNRC6C	-0.2	MIR153-2	-0.126	SNORA65	0.133304	GRIK5	-0.150902	TIMM23	0.66351	MIA	0.106172	DNAJC14	-1.02376	ATP2A2	-0.244477	HAUS4	-0.109847			SLC6A15	-2.93064	DHRS4	0.642	KCNK3	0.265764	LINC01020	0.09662			GLYATL2	0.0932889			COQ7	-0.0766227			PTCD2	-0.0358649	SAMD12	-0.395386	HAGH	0.362155
MUC16	-0.125	SPINK6	-0.149	CDC25C	0.105718	TSPO	0.412075	ERP27	0.213827	NUCB2	-0.392638	ETNK2	0.69471	SNW1	-0.203309	SPAG7	-0.11537			PCDHB9	-1.78532	KRTAP12-2	0.631	LNX2	-0.292034	H2AFV	-0.168324			WNK1	0.0954226			TRAPPC4	-0.14745			SFXN2	0.0206421	PSMD2	-0.34532	BC002627	0.362155
CLLU1OS	0.0833	SLC25A5	0.199	MAGEC1	0.124758	ATXN2L	-0.173516	FAM20A	-0.639378	ATP5J	-0.203454	C10orf118	0.615096	NME7	-0.22068	PAWR	0.174976			CCDC30	1.27509	BRCA2	1.33	SLC39A14	0.32892	CAST	0.183909			NABP2	-0.0620645			SLCO2B1	-0.192001			PRKAG2	0.0391893	RP11-290F24.6	-0.468227	SCG5	-0.261892
RAB38	0.162	MEST	-0.102	KMT2C	-0.218541	MIS18BP1	0.209118	SLC35F3	0.396712	ETFDH	-0.519555	C17orf108	0.540264	CCT8	-0.237011	STAG1	-0.104564			LINC00557	-1.68389	MRPL11	0.629	MASP2	0.271844	CAMK2G	0.272283			RCOR2	-0.0862706			JAGN1	-0.0903684			NPL	-0.0489491	MRPL21	-0.391267	BC093053	-0.261892
HINT3	-0.249	RALGDS	-0.168	SHISA9	0.125943	GEM	-0.210497	LRRC46	0.278849	RAB8A	-0.426792	MCOLN2	-0.188836	FBP2	0.127219	CCL22	-0.086154			CDC42EP2	-0.984524	BUB1	0.848	ZNF805	-0.408018	PDCD2L	-0.185137			CSF3R	-0.097072			TRMT2B	-0.104929			FLJ25976	-0.0414977	PARK2	-0.387063	IMPDH2	0.251039
CTSZ	-0.335	IRF8	0.233	SLC6A10P	-0.101219	VSTM2A	-0.155536	KCTD20	-0.352938	KIAA1109	-0.401508	C16orf59	0.374232	AUH	-0.230429	SKA2	-0.137639			TMEM170A	-0.921909	MRPL53	0.604	PAPSS2	-0.707456	CASP1	0.187434			PTPN6	-0.0745474			STAU1	0.0560665			SAMD12	0.0299708	RP11-566E18.3	-0.496938	BC006124	0.251039
ZNF585A	-0.156	ANKRD22	0.346	CKMT2	-0.149425	ARL14EPL	-0.236205	EFHD2	-0.242888	ZNF665	0.071438	MYH2	-0.16523	MAGEH1	-0.165042	CRCP	-0.0864897			KCNK7	1.93235	RNPEP	0.498	SLC5A9	0.275481	HHIPL1	0.143689			AAAS	-0.0766713			CAV1	-0.146493			TMEM59	-0.0308303	RP11-461G12.2	2.51986	FAM26D	-0.475397
MCC	-0.0984	PGAP3	0.221	BMPER	0.102606	CCDC85C	-0.185201	UNC13C	-1.18502	CASC1	-0.222046	PODNL1	0.19279	PEG3	-0.176355	NSF	-0.0941832			FREM3	-2.75461	PER1	0.783	IPO9	-0.389064	COX11	-0.198113			CCL8	-0.211776			SEMA7A	-0.141782			BAP1	0.0222676	OPCML	-0.644072	BC057769	-0.475397
CHPT1	0.504	RAB17	0.128	IP6K3	-0.129088	C16orf46	-0.181993	GADD45GIP1	0.593577	SLC25A33	-0.508369	PICK1	0.488138	TGM2	0.211915	IFNLR1	-0.0801467			ANKRD11	0.768824	FBXL18	0.642	CYP26A1	0.295659	ATAD3C	0.215237			IMMT	-0.0613467			VPS11	-0.110768			HIST1H3G	0.0356287	NDRG3	-0.401171	VASH1	-0.378386
TES	-0.193	LPA	0.1	SPAG7	0.234604	BAGE2	0.198482	LMX1A	1.59835	TRIM6	0.263437	FSCB	-0.135713	BTBD3	-0.266684	REEP1	-0.104813			FBXL13	1.59176	ADAMTS10	-0.974	IGH	1.32729	SIRPG	-0.358285			CDIPT	-0.143421			PHAX	-0.136193			CTSO	0.0572334	SERPINA3	1.70644	AL832588	-0.378386
SMC2	-0.125	SLC35A4	0.184	MAPK8IP2	0.144633	AIMP2	0.268135	RNF215	0.687433	LOC399491	0.402631	GBP7	0.248156	HEYL	0.154993	NGF	0.0802754			LINC01468	-1.5147	MLST8	0.465	SPANXB1	0.268148	EXD2	0.163441			CLIC2	-0.111603			RFX4	0.249482			SMAD7	0.0721084	HAS1	-0.943348	BLVRB	0.344583
FUBP1	-0.133	ZNF493	-0.291	THRA	0.127594	TIMM10	-0.461774	AGPAT4	0.395815	RBPJL	0.107238	TMEM68	0.744144	DZIP3	-0.23919	STK10	-0.10802			LOC101929949	-0.793848	GIPC1	0.523	TROVE2	-0.374547	FAM193A	-0.160688			NLRP14	0.0717366			SLTM	-0.0725373			ACTN1	0.0269231	RP11-215H22.1	-0.926178	BC109371	0.344583
GRAMD4	0.223	SCGB1B2P	-0.111	GPN2	-0.315311	OR10H1	0.154367	STRAP	0.464926	STARD13	-0.478038	MUC20	0.186111	CHST2	-0.224677	PEF1	-0.103692			IGF2BP2-AS1	2.4975	NUSAP1	1.27	HGD	-0.936072	LOC100507507	0.206237			CNN3	0.125533			RBM43	0.0997716			AGL	0.0303464	AC008122.1	-1.28576	CUTC	0.196807
POU2F1	-0.148	ESAM	0.415	SSX3	-0.14911	NUP155	0.219174	OR8G2	-0.739113	MTRF1L	-0.444657	ERBB4	-1.03163	MYL10	0.235894	UBBP4	0.095307			ELOVL2	-1.55926	MOSPD3	0.443	CHST11	0.290026	C8orf33	-0.247522			VLDLR-AS1	-0.104397			TMEM119	-0.0906191			ZNF187	0.0248828	CLSTN3	-0.89967	COX15	0.196807
SLC16A7	-0.097	CTNNBIP1	-0.112	STX17	0.140878	ACTR3B	0.174698	LOC574538	0.824868	HLA-DPB1	-0.678312	KCNAB3	0.219951	DCTN6	-0.177403	HIST1H3I	0.174319			DNMBP	2.03351	PTGFR	1.44	ARID1B	-0.435842	CRHR1	0.145883			MS4A4A	-0.0889534			FYB	-0.243108			GLTP	0.0476006	RP11-153K16.1	-0.983825	10q24	0.196807
TRIOBP	0.24	PLEKHA1	-0.294	LPCAT4	0.146421	ALDH8A1	-0.205743	DKFZP434A062	0.34998	ANKRD13C	0.246212	ADIPOR1	-0.958229	FMR1	-0.243664	OR10A3	0.0806299			ZNF24	-1.02828	TRAF1	-0.787	PLXNA3	0.294249	VEZT	-0.317796			THBS4	0.125341			NSUN3	-0.129597			PARK2	-0.0645251	IGLV5-52	-0.608426	BC028948	0.196807
KPNA4	0.177	RFC4	0.177	IP6K1	0.16542	CNGB1	-0.180252	VAMP1	0.711347	CYFIP2	-0.181989	PEX13	-0.739495	SPCS1	-0.185354	SMPD1	-0.0701616			EZH1	1.40464	SLFN13	-1.34	TECTB	0.320302	ZNF280C	-0.200542			STARD4	-0.164757			FZD4	0.101667			CLEC4D	-0.0530444	PLEKHA4	0.734126	SP7	-0.365049
AFAP1	0.0769	AHCY	0.353	PRDM8	0.280462	AQP12A	0.207797	LINC01514	-0.765811	C1orf63	0.589033	HSPA13	0.396239	ARPC2	-0.252623	NDEL1	-0.0626643			COL8A2	-0.914524	PEF1	0.589	MORF4L2-AS1	0.329286	LRRC4	0.377024			LOC439938	0.115964			TLR1	-0.189494			ZNF215	0.0610283	TPI1	-0.532652	AK128520	-0.365049
TACR2	0.104	IGSF22	-0.109	WDR78	0.115101	SCARNA17	-0.234642	MGC32805	0.527443	TRPV5	0.114206	HRSP12	-1.09831	TFAM	0.228543	SNORD115-24	0.14675			OR8B8	-2.647	KRT18	-1.19	MFSD4A	0.289715	SLC16A7	-0.36441			FAM216A	-0.137868			USE1	-0.101575			TLX3	0.0352579	HYOU1	-0.401691	SPATA24	0.333255
EIF5A	0.285	CBLB	-0.361	ZNF655	-0.165853	GPR82	0.170798	ZNF350	-0.347407	RAP1GAP2	-0.230559	PFN2	-0.672285	FUT7	0.284083	COPZ1	-0.116752			PKN3	-0.888416	PDE7A	-1	UHMK1	-0.740166	ZNF542P	-0.355763			ARHGAP15	-0.114623			PBRM1	-0.0727109			OR2C1	-0.0258851	ADAM22	-0.427845	AK098740	0.333255
SMIM14	-0.485	PCDHB19P	-0.481	FCGR2A	0.328451	GJA5	0.13969	BICC1	-0.846106	CCDC86	0.39462	MAML3	-0.202937	NRCAM	-0.169128	CCNK	0.111			SYT5	-2.09067	WIPI2	0.462	C19orf43	-0.730514	HUWE1	0.155821			CLCN3	-0.10289			KRT6A	-0.115699			PRDM10	0.0266195	MIR23C	-1.05607	RPAIN	0.232992
MBTD1	-0.356	EVI5	-0.613	RARRES3	0.290693	CARHSP1	-0.259986	ASF1A	-0.188241	ABCB5	0.0997356	CDK5RAP2	-0.353641	NDUFB6	-0.199927	MKRN1	-0.0712806			LOC101927539	2.28181	RSAD2	1.11	BCAT1	0.734558	TTC12	-0.217962			UBQLN2	-0.0832816			TAS2R9	0.133998			KTI12	0.0374747	AHNAK2	-1.03022	AY775317	0.232992
IFT74	-0.201	PVALB	0.397	MTRR	-0.166573	NFIC	0.277715	COPA	0.36111	TIA1	0.347021	RANBP2	0.6105	TBC1D16	0.179591	THADA	-0.112946			MMP26	-1.69176	NRN1L	0.703	BBX	-0.705197	FCHO2	-0.314762			TFPT	-0.0576016			C3orf70	0.102435			DSC3	0.0357195	DUSP14	-0.538821	NR6A1	0.268054
ZNF347	-0.103	OST4	0.339	TRPV1	0.118573	SETD7	-0.189166	DEGS2	0.545172	PCDH11Y	0.115556	SURF4	-0.993427	PCYOX1	-0.333183	KDM8	-0.109215			SH3GL1P1	-2.5116	ITM2C	0.661	SLC4A7	-0.588268	NOP14	-0.205771			DCK	-0.115992			C8orf4	-0.11323			EPHB1	-0.0521159	TMEM183A	-0.426755	BC030600	0.268054
CD160	-0.487	CTBP1	0.253	RPA4	0.148599	MGMT	0.268117	PER2	0.553547	GPR144	0.118763	MTMR4	0.657029	GCC2	-0.245082	PDZD11	-0.0949127			CIZ1	-0.731968	GTPBP3	0.606	ZNF551	-0.565511	CUL2	-0.259498			ZNF576	-0.103484			YARS2	-0.114091			HMOX2	0.0287019	CRMP1	-0.588126	C14orf156	-0.208746
WARS	0.419	PSMB8	0.359	THOC2	-0.190423	POMT2	-0.226607	THEM4	-0.357665	CYSLTR1	0.132327	ZNF518B	0.814878	ELMO1	-0.176858	TRAPPC9	-0.0953612			NEUROG2	-1.75107	DHRS3	-0.76	MLC1	-0.609418	PATZ1	-0.242389			NDUFA7	-0.0551695			IL34	-0.0989074			SLC22A12	-0.0277254	GRB2	-0.298223	AY860853	-0.208746
ARMT1	-0.149	SEC14L1	0.174	MIR1537	0.122371	DIS3L	0.153384	ACRBP	0.670707	FDFT1	-0.328601	YIPF4	1.05593	DDX50	-0.184434	LOC400002	0.103187			FLYWCH1	1.31578	FUT3	0.818	GXYLT2	0.282532	LOC102724017	-0.219336			SIN3B	0.0555001			NUP214	0.0865361			ZBP1	-0.0545545	CXXC5	-0.320372	OR1N2	-0.314522
KLHL8	-0.139	PKNOX1	-0.287	MMP20	0.134506	AFF4	-0.291821	LAT	0.634199	UHRF1	0.0807488	HOOK3	0.701216	PLCG1	0.123178	TBL1Y	-0.0972789			FRY	-0.915297	FGFBP3	-0.832	VDAC1	0.287074	ZBTB43	-0.189382			SCARNA5	0.086354			ZNF71	0.0684079			LOC113444	0.0228442	C14orf79	-0.578648	BC137182	-0.314522
FSHR	-0.0912	ROPN1B	-0.0979	KLHL21	0.149588	HNRNPA1L2	0.151072	RGR	0.346503	MPZL1	-0.465361	RC3H2	-0.624392	TP53TG5	0.206927	ICA1	-0.125748			TRIM8	-2.73783	BMPR2	0.632	URGCP	-0.789341	BBX	0.254716			PLCXD1	-0.156893			VPS53	0.0917151			RPN2	0.0247791	PAK7	-0.570337	AS3MT	-0.31009
PDXK	-0.31	SH2D5	-0.131	PIGV	-0.223581	ZMAT3	-0.488757	CELF2	0.553147	TTC5	0.306745	C19orf53	0.654642	CLK2	0.120515	PFDN4	-0.127203			CRB3	1.20898	MATR3	-1.59	RABGAP1	-0.383542	SSX2IP	-0.257013			CST3	0.17726			GARNL3	-0.0868369			GTF2H3	-0.0290366	MAGEE2	-0.657819	C10orf32	-0.31009
NSUN6	-0.152	IGIP	-0.271	TCP1	0.20057	PRPF38A	-0.218777	KCTD11	0.746262	TAGLN3	-0.153099	DHRS7B	-0.910028	SYT1	-0.867317	COMMD10	-0.148965			FNDC9	-1.30154	GPC2	-0.605	SIK3	-0.664122	BCKDHB	-0.272712			CD109	0.095132			CCKBR	-0.136158			FAM113A	-0.0727369	GARS	-0.405629	AF226730	-0.31009
MINK1	-0.138	SECISBP2L	-0.137	PARTICL	-0.154332	CCDC86	0.216135	BRAP	0.704796	GPR114	0.107892	RUNDC3B	0.483765	TLX1	0.160807	SLC8A1	-0.187798			TMEM50B	0.74987	EGF	0.911	PCDH18	0.331598	EMP1	-0.511066			HTRA1	0.116211			ABHD16A	-0.0628731			UAP1L1	0.042185	LRRTM3	-0.433702	SLC31A2	-0.315057
TRPC4AP	0.186	MMAB	0.158	C16orf46	0.143838	IL1RL1	0.159031	MXD1	0.464288	ZFAND1	-0.491551	RXFP1	1.26248	PTGES3	-0.258	ZMYND11	-0.0823198			BAALC	-1.53864	SHOX2	0.694	EMX1	0.277985	DPEP2	-0.241101			MIR128-1	0.105839			TMEM223	-0.0735203			CHRNA7	0.0308836	linc-TCP10-2	-0.978082	AK131546	-0.315057
SUSD2	-0.113	SLC22A12	0.0989	CCL27	0.141717	GSTZ1	-0.188469	TMBIM6	0.222689	FSHB	0.107853	TCF12	0.844247	LMBRD1	-0.180549	CBX5	-0.0737614			SYMPK	-1.52766	PRDM11	0.606	NT5M	-0.549457	EIF2B3	-0.174682			NIM1K	0.0734274			BPGM	-0.0888125			NEFL	0.0949368	SCYL1	-0.341723	TAGLN	-0.349667
CLDN3	-0.0924	PRKAA1	-0.229	C21orf59	0.105097	ZMYM2	-0.213853	TSR3	-0.579772	ISCU	-0.308056	UBE2H	1.16794	EPHB4	0.279675	GPD1L	-0.173075			POU4F1	1.2265	NFATC3	-1.03	LINC01209	0.28831	DIEXF	-0.277969			RAB31	0.177869			MAOA	0.16325			SCNN1D	-0.0306134	ATP6AP1	-0.398487	transgelin	-0.349667
TMEM181	-0.256	XIRP1	0.106	TTC13	0.187626	MESP1	-0.163826	SMIM13	-0.386185	POLN	0.105909	FAM98A	-0.489911	MFSD6	-0.352298	LAMTOR4	-0.0937497			STATH	2.04341	SLC36A2	0.78	AIM1L	0.376704	MT1X	-0.308267			PIK3CB	-0.138002			LINC00158	0.10435			C1orf124	-0.0349045	PCNPP	0.537289	PCSK7	-0.349667
NUDCD1	-0.0985	IRF2	0.171	GPC5	-0.154032	PRAMEF9	-0.140092	FOXP2	0.702139	SLC25A24	0.298209	C4orf35	-0.161687	ELOVL4	-0.239172	CDHR1	-0.115674			GLRA3	3.11792	FCRL3	-0.985	PCMTD2	-0.714092	LMO4	0.19915			EIF4A2	-0.117647			ULK1	0.0984091			NUMBL	0.0195998	GLUD1P6	0.68019	AB209555	-0.349667
ERP44	-0.11	LYPLAL1	0.304	SPDYE2B	-0.236942	LOC101928326	0.164525	TAAR5	0.565653	CD2	0.128546	CREG1	0.681814	PPP2R5C	-0.238878	RAB40A	-0.074471			HEATR9	1.47651	MTMR9	-0.391	MCM3AP-AS1	-0.654453	ATP6V0E2	-0.31343			SEL1L	-0.0920859			ERCC1	-0.0735638			SPOCK3	-0.0392975	TCF7L2	0.389691	AK127262	-0.349667
ZC3H12A	0.21	GPS1	0.165	RNU11	0.496998	EIF5	-0.217507	SPRR2C	-0.751128	BEX1	-0.0789489	BARX1	0.151521	ATP6V1C1	-0.400529	ADAMTS5	-0.182887			ANKRD35	-2.75933	TDRD7	-0.495	PUM3	0.20676	PPP1R14A	-0.392312			RNASE9	0.084188			SIX4	0.0860072			PARVB	-0.0448144	NOV	-0.868907	RAB34	0.182581
LOC338620	0.13	GPR22	-0.116	ASMTL	-0.177621	EPHA10	0.178085	SLC25A36	0.595515	STK16	-0.315405	DDX43	0.201368	CCDC91	-0.252341	MIR26A2	0.17731			SCARF1	-0.770878	DNAJC25	0.787	ZNF789	-0.447131	PIP5K1A	0.243227			TTC28	0.0828409			FYN	0.072942			MEF2C	0.0298134	SLC1A6	-0.661019	BC016841	0.182581
P4HTM	0.144	PSMB2	0.235	MPLKIP	-0.244429	GDPD1	-0.4689	NCF2	0.680313	SGCA	0.133648	MIDN	-0.160998	ACSL3	-0.257869	BRINP1	-0.103177			ATF7	-2.10603	TBC1D10B	0.388	OGT	-0.351531	KLHL8	0.23525			MFSD1	-0.123043			OVGP1	0.151233			HRB	0.0362147	NPTX2	-0.982729	CD82	0.247122
USP4	-0.142	OBP2A	0.092	CNTROB	0.129677	RESP18	0.182316	GUSBP4	-1.06096	DAG1	-0.288631	TMEM129	0.795676	TIMP3	0.295174	ACAT1	-0.0937963			DIO3OS	1.82217	HDAC10	0.413	MAX	-0.323574	MIR3682	-0.173728			SLC25A48	0.0599494			NAXD	-0.0641464			PGAM5	0.0349479	EDN3	0.484026	U20770	0.247122
RRBP1	-0.269	SPRN	0.146	PTK6	0.107192	ATP5S	0.222129	PADI2	0.231844	PEX16	0.123524	ST6GALNAC3	0.642591	VAMP7	-0.232484	ASIP	0.0963814			LOC100128554	2.46156	PDCD5	0.636	ACACB	0.361656	RUVBL2	-0.2062			ARPC5	-0.0713141			UBE2V1	0.090984			CDKN2C	0.0145262	KCNK3	-0.794533	AK098031	-0.2677
ALDH3A2	0.203	NMNAT2	0.125	HIGD1A	-0.204091	CLCC1	0.179214	POFUT1	0.514404	GRM6	0.120701	HS2ST1	0.895434	PCDH8	-0.457663	AZI2	-0.104251			CACNG7	1.84656	NES	-0.477	TBX18	0.239271	PDE8A	0.179247			FXYD5	-0.06872			BORA	-0.0863866			APBA2	-0.0311855	CNTNAP1	-0.774398	FLJ40712	-0.2677
CHI3L1	0.104	MPRIP	-0.164	TCF20	-0.246886	CEP19	-0.33326	SERTAD4-AS1	-0.507207	SFTPB	0.119428	C12orf33	0.173175	PENK	-0.323363	STARD7-AS1	-0.133122			EMILIN1	1.58692	SGTA	0.579	GABPB2	-0.336912	RPS6KB1	-0.139486			MRPL53	-0.108295			LYSMD1	-0.082238			C6orf117	0.0216854	SLC22A17	-0.472471	SPRNP1	0.319689
BATF2	0.134	ERLIN2	0.149	C7orf34	-0.102773	GSTT1	-0.189542	THSD4	1.10879	SPRR1A	0.16818	DHDDS	-0.435869	GABRA1	-0.572122	MAPK8IP2	-0.0840487			CAMK2B	-0.934759	LTBR	0.637	CLASP2	-0.554104	SHROOM1	0.249494			ANKRD34B	0.0709934			PIGB	-0.11482			CD3E	-0.0934406	GPR68	-0.946337	SPRN	0.319689
APH1B	0.167	XK	0.201	MIR1275	0.133459	SLC35E1	-0.394343	LRRC20	-0.254726	C6orf192	0.143624	BIRC6	0.728637	COLGALT1	0.151232	KCND2	-0.158828			RIPPLY1	-1.48683	CD63	0.71	NDUFB6	0.267843	DAZAP1	-0.162925			CSTF2T	-0.0642138			HEPH	0.232772			ABHD14A	-0.0654583	FAM134C	-0.258904	AK126615	0.319689
ZADH2	-0.188	PML	0.117	VHL	-0.290823	LRRC28	0.250866	RAB21	0.35285	NRG1	0.25407	VAMP4	0.53825	TCOF1	0.145382	SCARNA10	0.172487			TSC22D1-AS1	-1.73381	TK1	0.68	RHBDL3	0.299127	DZIP3	-0.303233			SMOX	0.116532			LCMT2	-0.0958778			HGF	0.0395959	KCNA2	-0.596592	CRB2	-0.343024
GOLGA8DP	-0.0877	ATG4A	-0.133	NUFIP2	-0.245586	GTF2I	-0.174662	SEC16B	1.00305	SURF1	-0.56618	MCM7	0.536127	TIMP1	0.323638	ENDOD1	-0.0870565			LRRC56	1.89256	KIAA1919	-1.34	CD37	0.260734	LGMN	-0.267649			NSUN4	-0.0826209			FAM174B	-0.0511042			ZNF398	0.0322865	KRT222	-0.75634	AK126775	-0.343024
FAM188A	-0.143	ABCG4	0.151	PRKCDBP	-0.234477	ERG	0.157221	ZNF233	-0.320611	UBR1	-0.277674	CASP3	-0.834207	MYT1L	-0.309763	ATP6AP1	-0.0823648			PFN2	1.09634	CCDC84	-0.72	KLHL8	-0.526633	CLCN3	-0.199241			MORF4L1	-0.089746			ARHGAP15	-0.132932			PLA2G1B	-0.0222009	AP002530.2	-0.751001	ACSL6	0.155027
HPRT1	0.212	BEND7	0.121	MARS	-0.247638	LINC00704	0.128678	FUBP3	1.16401	ZNF782	0.486641	NR2C1	0.721717	KIAA1549L	-0.260936	BMF	0.0998392			LOC100289094	2.30676	TAF9	0.693	HCG18	-0.433049	COQ6	-0.174568			RFX5	-0.119104			TANGO6	-0.0810891			SLC25A29	0.0161652	C1orf74	-0.373119	AF099740	0.155027
DNAJC28	-0.171	MTMR10	-0.313	OR4C16	0.0917139	NYAP2	-0.148932	MECOM	0.285465	ATP5B	-0.283761	FAM23A	-0.142052	TBX2	0.168796	EXOSC7	-0.0834615			NSMCE4A	-2.4821	PCCA	0.61	BTRC	-0.356221	LINC01089	-0.154734			WWC2	0.0859794			PTGFR	-0.0821236			ZBED4	0.0371072	linc-UFM1-2	-1.11974	CSF1R	-0.305708
USP51	-0.13	GCKR	-0.155	MED25	0.375102	RAB2A	0.181141	SZRD1	-0.297053	HSD3B7	0.143321	ACOT6	-0.154398	NEFM	-0.492671	KCNE2	0.126763			HRK	2.44896	THADA	-0.684	SUPT20H	-0.787887	RRP8	-0.146746			RNU5E-1	-0.200618			NDUFA9	-0.130582			SAP18	0.0520322	TOMM40L	-0.378567	BC047521	-0.305708
PDGFRA	0.0678	COL14A1	0.168	RCCD1	-0.105318	HERC4	-0.172356	TIFA	-0.445689	LOC645261	0.123237	ODF2	-0.454566	FKBP3	-0.187862	MARK2	-0.0737274			LINC01622	1.20032	MAPK3	0.671	PDLIM7	0.726626	PPP3CB	-0.232353			LINC01547	-0.073135			C10orf67	-0.0785562			DLST	0.0207932	linc-COL1A1-2	1.12932	KRTAP4-1	-0.265031
MAGEA11	-0.0859	RGS19	0.319	UQCRB	-0.15939	SPIN1	0.253464	LOC200830	1.19368	HYOU1	-0.754809	C19orf21	-0.196955	SNRPE	-0.211392	ADGB	0.0821727			UBN2	-1.94734	ASNA1	0.553	ADAMTSL4	-0.576248	SH3GLB1	0.154639			FUZ	-0.0670057			TRIM38	-0.140942			RAD51L1	0.0218114	GABARAPL1	-0.549737	BC065372	-0.265031
RNU11	0.354	GSTM2	-0.138	CDH7	0.105199	SIK2	0.149672	SLC2A13	0.273482	FAM111B	0.203749	JAK3	-0.21625	ST14	0.15179	TSSC1	-0.103437			BHLHE41	-2.38447	ERI2	1.03	CLP1	0.212222	KIT	-0.342718			FNDC3B	0.0863922			OAZ1	-0.154956			AEBP1	-0.0343344	ECSIT	-0.331992	KRTAP4-2	-0.265031
PXMP2	-0.104	OGFOD3	0.231	FBXO38	-0.33961	PDCD10	-0.264838	ZNF428	0.261908	CORO1A	-0.433134	INPP4B	0.498504	SNCA	-0.435495	SRBD1	-0.145131			LSM14B	-1.16926	ERCC2	0.758	RAD52	-0.453181	ABCC13	0.143284			SLC35B4	-0.151703			DECR1	0.105562			STARD3NL	0.0227335	HIST1H2AD	0.842224	MAD2L1	0.335228
GPATCH2	0.138	DSTN	-0.107	SCGB3A1	0.608207	WNT5B	-0.145083	KHDRBS3	0.528713	B4GALT7	0.196511	RPL31	0.643157	OXCT1	-0.26737	GOLM1	-0.0760672			C14orf180	1.67964	KDM1A	0.602	LRRN2	0.29062	UBAP2L	-0.199551			GAD1	-0.177306			AARS	-0.120976			DTX3L	0.0304065	GLRA2	-0.682134	4q27	0.335228
RARRES3	0.249	RASA1	-0.23	ZNF177	0.138833	PPP1R14B	0.338466	NR6A1	1.13929	TRIM35	0.423671	TNNI1	-0.162367	UBA3	-0.248137	C5orf60	0.124958			LOC643201	-1.18045	FHL1	0.982	STXBP6	0.266231	MRPL35	-0.265243			TIMM10	-0.0799335			ZMYND11	-0.045622			DECR2	0.0177666	RP11-378A13.1	-0.613728	BC005945	0.335228
SNORA67	0.318	ADD3	-0.219	RTBDN	0.236316	HSPA13	-0.238277	HOXC10	-1.05979	PHACTR2	-0.400217	C1orf114	-1.10809	GTF2H1	-0.290577	LOC100129572	-0.110653			AFDN	1.31627	ZBTB6	0.56	CYP1A2	0.335677	HS2ST1	-0.287465			DCTN2	-0.0846417			DONSON	0.0830238			MLLT3	0.027175	ZNF233	-0.532725	CHL1	0.214791
R3HDM4	0.356	FAM3A	0.287	SLC44A4	-0.135888	PAFAH2	-0.207172	LMBR1	-0.310825	ZNF394	0.133219	SLC8A2	0.602637	IZUMO4	0.197019	SMAD5-AS1	-0.0994313			TLX3	2.14027	WDR41	0.475	KCTD21	0.382021	MARCH2	-0.466264			FGL2	-0.386238			ATP6V0B	-0.197492			MAX	0.03205	HOGA1	0.502503	AF002246	0.214791
FCGBP	-0.408	NCAN	0.15	ZNF431	-0.183304	DLEC1	-0.165157	LOC105379045	0.389345	ZMYM6	-0.57454	UBE4A	-0.593026	RNF122	0.156897	GLTSCR1L	-0.105012			SIGLEC15	-1.04181	DNMT1	0.399	ZNF425	0.31502	JCHAIN	-0.694258			VPS35	-0.104417			RNVU1-1	-0.154791			PPFIA3	0.0366434	AL132709.3	-1.01982	ZNF329	0.228067
LAG3	0.276	TSPY26P	-0.192	GLT6D1	-0.110224	ZNF302	-0.138007	ITPR1	-0.56581	FCRL6	0.197067	C9orf82	0.761685	YWHAQ	-0.202065	TTYH3	-0.111002			GINS4	0.807213	VKORC1	0.44	LOC151760	0.278943	SNHG19	-0.252208			SLC20A2	-0.137165			ZNF471	0.105464			MDS1	0.0318674	GUCY1B3	-0.630447	AK090893	0.228067
HRASLS5	-0.113	SOST	0.112	OR4C45	-0.120134	COL4A5	-0.134173	UBALD1	0.613075	C11orf54	-0.349019	IDS	0.155539	YKT6	-0.234874	SNORD115-40	0.113097			TLX2	-2.5634	CLSPN	1.57	TDRP	0.318875	LCORL	-0.245005			PRKCD	-0.124851			UNC50	-0.0813023			ZNF649	0.0318094	BICD1	-0.293102	PSMB3	0.26768
ZNF559	-0.238	VPS9D1	0.286	SNORD116-4	0.111156	PACRG-AS2	0.166515	CNP	-0.302152	TUBB4Q	0.133122	TNPO1	1.04709	NOL7	-0.188641	C1QA	-0.112383			CHSY3	-1.57932	DHRS1	0.537	CASC23	0.26965	SLC5A9	0.148597			TBRG4	-0.0764367			ZNF609	0.0829146			PLS1	-0.0253491	AL691479.1	-0.960001	17q12	0.26768
STK33	0.0989	HLA-DRB6	0.48	NUP98	0.229714	RNF146	-0.199043	LINC01585	0.684335	FBXO47	-0.0862076	ARF6	-0.34198	C12orf4	-0.19669	KIAA1107	-0.105257			NSUN7	-2.18347	KIF21A	-1.2	SQSTM1	-0.612024	SMARCA4	-0.215131			COQ10B	-0.102098			CCT5	-0.124244			TNIP3	-0.0584734	IL34	-0.778303	BC013008	0.26768
ARHGEF18	-0.309	ZNF302	-0.317	PARL	0.271337	LINC01551	-0.151558	DUOXA2	0.395336	SECTM1	0.133475	SAA2	-0.203057	KIF1C	0.140666	HDAC6	-0.0839936			ZBTB10	-0.751046	EOMES	-0.516	LRPPRC	0.294313	PPP4R3B	-0.19725			HSP90AA1	-0.0868174			DNER	-0.121423			GCLM	0.0506104	RLIM	-0.390751	ITGB8	-0.406869
AGFG1	-0.0899	PLAGL2	0.324	ST6GALNAC4	0.239863	CIPC	0.159082	MDFIC	0.611145	RALB	-0.384528	SEC62	0.402673	MYOM1	0.117414	SBF2	0.0933119			LOC401068	-0.903269	HMOX1	0.669	C14orf105	0.283344	SLC35C2	-0.123762			KCNJ9	-0.0825507			BCAT2	0.0975122			TNFAIP8L2	-0.0385938	PNN	0.477997	M73780	-0.406869
LYPLA1	-0.191	FAM107B	-0.292	GEMIN7	0.122519	ARF5	0.286505	AGAP11	0.723079	CEACAM1	0.12592	C1orf107	-0.228281	TBPL1	-0.240226	FAM234B	-0.10557			ANXA2P3	1.54267	MYO9B	0.555	CDC14B	-0.754432	GFPT1	-0.38203			SLC25A33	0.108363			SNORA22	-0.138962			ABCA2	0.0683528	MAPK10	-0.515721	GRAP	0.279443
MYZAP	0.117	MTR	-0.262	CECR5-AS1	-0.152184	LOC154761	-0.159082	CCDC152	0.482147	SLC12A2	0.239242	HDGF	-0.650189	PPP2R2B	-0.162375	KCTD2	-0.0692887			CLEC5A	1.49853	GPR133	0.586	LOC102723721	0.323655	ARHGAP5	-0.330472			EID1	-0.0678919			KCNS3	-0.12014			TLR6	-0.0309693	APBA1	-0.63921	GRAPL	0.279443
USMG5	0.453	NTM	-0.146	SDF2L1	-0.447283	TIGD7	-0.179444	BPTF	-0.209757	ZNF2	-0.512001	SUB1	0.389522	FEM1B	-0.234184	MRPL24	-0.0769098			ATM	2.63169	NALCN	-0.519	NEDD4L	0.338258	KDM3B	-0.278302			GALNT10	0.0695733			MAB21L3	0.0848484			ABCB11	-0.0302864	MIF4GD	0.426216	BC035856	0.279443
PPP1R16A	-0.2	LEPROT	0.398	MRGBP	-0.353247	EIF3J	-0.17284	ING3	-0.296367	TBRG1	-0.194007	PGAP3	-0.239387	SCG5	-0.276021	BMPER	-0.199635			SUCLG2-AS1	-0.827354	MAP3K5	-0.451	FAM219B	0.424905	AHI1	-0.253687			PPIL1	-0.0921387			ARHGAP31	0.175851			TMEM23	0.0750207	RP11-399O19.5	-0.673558	BC157869	0.279443
GUCD1	0.207	ITPKC	0.18	HS3ST3B1	-0.143812	PHTF2	0.153828	ALKBH5	0.183818	TCEA2	-0.265651	GFRA2	-1.24414	STX7	-0.172869	SLC37A1	-0.124395			FRY-AS1	2.40382	MORN1	-0.568	CRH	0.301832	LINC01191	0.161979			CD53	-0.244092			COX8A	-0.0628427			ZNF329	0.0184358	PTPN12	0.37074	OXSM	0.219578
PNP	0.337	NRF1	-0.0966	PHF21B	-0.151458	MPDU1	0.202808	MEF2D	-0.752721	DLG4	-0.413376	LOC100132099	-0.211277	LSAMP	0.195438	ETNK2	0.106726			CBL	0.622124	ZMYM6	-1.28	LOC101928014	0.355676	TMEM107	-0.339858			FNDC4	-0.0618371			GJA1	0.344388			SEMA4G	-0.0379368	OSBPL3	-0.487527	AK000611	0.219578
PLIN2	0.19	SMAP2	0.268	CHRNA9	-0.149721	ATOH7	-0.151789	DNAL1	0.321404	TMCO1	-0.257398	SFXN5	-0.310714	CPT2	0.131469	GPR158	-0.112062			GPR39	-1.17164	CCDC43	0.832	KHDRBS3	0.319762	SLC39A14	0.151065			FAM134B	-0.0981809			ZXDC	0.10215			AVIL	-0.0522921	FBXO9	-0.234846	STIP1	0.222352
MIR548B	-0.0881	FAM96A	0.247	ADAM22	-0.115926	KCNH5	-0.151886	KIAA1324L	0.247518	SERPINB13	0.129822	RRP15	0.714504	CLN6	0.190045	ZNF486	0.14026			CTNNA1P1	0.873834	RBM15	-0.53	SNAPC3	-0.551104	UGGT1	-0.290306			N6AMT1	-0.120937			TYRP1	-0.1465			PSD2	0.0305175	HRH1	-0.678785	BC039299	0.222352
ZNF773	-0.371	DYNAP	-0.154	TSHZ1	-0.219168	ZNF185	0.477808	IGFBP4	-0.71203	YIF1B	0.165433	ZNF597	0.895639	RARA	0.18783	PFDN1	-0.106047			ZNF740	0.767053	GLP1R	0.485	CFLAR	-0.792495	SCFD2	-0.346672			GPRASP1	-0.158292			NXPH1	-0.147947			TRAPPC6A	0.0284433	CTBS	0.42404	EP400NL	-0.18739
EIF3M	-0.218	ZSWIM8	-0.295	SERF2	0.414677	TGS1	0.210693	CEP41	0.26987	ANKMY2	-0.340583	KDM5C	0.988796	DHCR24	-0.266937	ROGDI	-0.0987971			SH2D1A	2.23002	LMF1	0.505	CLIC6	0.272456	SLC25A32	-0.262907			RBM18	-0.111984			POLR2B	-0.142193			GNL3	0.0458353	KCNA4	-0.833285	EP400	-0.18739
MOBP	0.0704	IDH3B	0.292	A1BG	0.129461	PVRIG	-0.276318	WDR19	0.529725	TPM4	-0.388336	CDNF	0.356599	NDRG3	-0.448567	FGF14	-0.104776			SSH3	-1.05233	GSG2	0.927	ALKBH3-AS1	0.26651	GANC	-0.274658			TRAPPC4	-0.124414			MTMR4	-0.0950986			NDUFS8	0.0279447	PPP1R17	-1.18376	AK289710	-0.18739
ZMYM4	-0.129	MAN2A1	-0.189	TAL2	-0.102373	B3GALNT1	-0.171698	CEMP1	-0.587412	PDCD1	0.0993188	ZNF777	0.322644	SEC61G	-0.246309	GOLGA2P5	0.11693			CX3CR1	-0.770779	GBA	1.25	HNF4A	0.39928	GPR153	0.148035			C21orf33	-0.0634582			LURAP1L	-0.126306			TMEM9	0.0315466	RP11-17L5.4	-0.813672	AY044869	-0.18739
CHST12	-0.272	TOR1B	0.179	LINC01311	-0.107115	AGAP6	-0.325903	LOC283194	0.784581	HSP90B1	-0.114385	GAPDH	0.178365	PRSS23	0.13011	ST8SIA5	-0.0966682			DKFZp547J222	-1.10456	RBM4	-1.16	NEK1	-0.524267	G3BP1	-0.195189			SRP9	-0.0872308			REN	-0.0920501			NRAP	-0.0302034	RNU7-60P	-1.17314	BC037208	-0.18739
RPUSD2	-0.215	SERPING1	0.245	OR51M1	0.116481	DAAM1	-0.187543	PATE1	0.50572	CKM	0.0966834	C22orf29	0.788662	GNAS	0.270484	CYB5D2	-0.0810999			MARCH1	-0.978181	C21orf96	-1.32	MED27	-0.240626	GALNT8	0.159551			NDUFS8	-0.0509947			TM9SF2	-0.111961			VGLL4	0.0464714	GAPDH	-0.393673	AK126212	-0.18739
BRINP3	-0.113	FOXP1	-0.261	WISP2	-0.111244	NCAN	0.227597	MYH7	0.391344	WFIKKN2	0.124445	TEX10	-0.757976	CFAP20	-0.223208	PITPNM1	-0.0896724			MPO	0.779866	CC2D1A	0.569	DNAJC1	-0.35724	YIF1B	-0.266953			CYCS	-0.103117			PTPRZ1	0.198689			PTPN12	0.0555259	MAFG	-0.460066	AK091234	-0.18739
ALAS2	0.344	POLE	-0.144	NEDD9	-0.325083	C3orf14	-0.164486	A2M-AS1	0.475656	NUP210L	0.111097	PDGFRA	-1.07589	MAEA	-0.268152	KIF21A	-0.0995397			ZNF29P	1.32457	AFAP1L2	0.792	GSN	0.279	ECI1	-0.188937			SPRED2	-0.0959032			CIDEB	-0.0849007			ZNF646	0.0255426	RP11-387D10.2	0.770935	AK128208	-0.18739
COPA	0.204	METAP2	-0.191	NOL4L	-0.127943	BCL7C	-0.171973	FAM107A	1.44197	IGSF21	-0.484359	ODZ1	0.646491	SACM1L	-0.240106	TUBG2	-0.0944206			LINC01578	-1.06533	PPP1R11	0.464	AP1AR	0.244886	FAM162A	-0.20834			GJD2	-0.079798			TUBGCP5	-0.115412			PAOX	0.0254357	RABGAP1L	-0.323912	AK090610	-0.18739
ATP2B1	-0.18	EIF2AK4	-0.624	CUL1	0.182706	PAXBP1	0.151931	HERC6	0.906557	TRMT112	-0.36005	PDE12	0.888043	EML1	-0.207541	ZNF724	0.274694			HMCN2	-1.7613	FAM190B	-1.39	ATP6V0A2	-0.43177	LINC00112	0.152041			SSX1	0.0640476			MTCH2	-0.0831848			SNAP29	0.0159242	RP11-326C3.11	0.824649	AK097720	-0.18739
CALML5	-0.0852	TMOD2	-0.157	VWDE	0.136936	GAGE6	-0.158858	LOC101927752	-1.1039	MAPK14	0.225709	MTAP	0.499717	ADGRD2	0.310296	ZNF799	0.20133			BANK1	-0.572677	EPB41L4A	1.02	LNPEP	-0.556524	ECE2	0.16553			EPC2	-0.218288			HCG8	0.123162			ASCL3	-0.0261724	ARMC6	-0.348232	BC066974	-0.18739
AMD1	-0.238	NOC2LP2	0.17	TTF1	0.159802	TMEM181	-0.22786	ERGIC1	0.953555	C11orf48	-0.321583	LOC100130933	0.301671	LMF2	0.128433	C19orf12	-0.0778364			RUNX1T1	1.19808	PMM2	-0.704	UAP1L1	-0.522803	TMEM63C	0.29725			SKAP2	-0.159338			UG0898H09	0.297351			KIAA0082	0.0263638	SEPT6	-0.38266	AL117637	-0.18739
ZNF223	-0.565	PPP1R18	0.341	LLGL1	-0.270412	FAM86B3P	-0.149032	EPAS1	0.731367	PACRGL	0.430514	ISCU	-0.186054	RCN3	0.14662	SLC25A3	-0.0730652			TRIOBP	1.19299	WSB2	0.572	MGAT5	0.311408	TMED9	0.267759			ASH2L	-0.104305			ANGPT1	-0.124621			RGL3	0.0224572	RAB6B	-0.74093	FLJ42393	-0.369627
SH3RF3	-0.105	MIR18B	0.128	FOSL1	0.110511	IDH3A	0.212335	ST3GAL3	0.40667	POLM	0.222072	HTR4	0.486219	MMP19	0.157668	AGK	-0.0849146			VGLL1	-0.833527	NKIRAS2	0.474	GCGR	0.37351	PPP4R3A	-0.183322			MIR125B1	0.0886183			ACY3	-0.0921716			C1RL	0.0228091	BPI	0.89963	AK124384	-0.369627
FAM163A	0.0806	DYSF	0.374	EVL	-0.442209	LOH12CR2	-0.137993	RIOK3	0.409308	GTF3A	-0.267176	KIF21A	-0.186578	RREB1	0.170913	GPR162	-0.120947			ERVFRD-1	-0.958283	GNG11	1.56	ADGRL3	0.298744	DPY19L2P2	-0.234055			ZNF724	0.217796			MT1A	0.209145			NDST3	0.0308424	ACTR1B	-0.291834	GATC	0.189351
ZSWIM8	-0.247	NSL1	0.131	RBMY1E	-0.120445	LOC401463	-0.198122	ZNF718	-0.630679	SLC24A2	-0.303378	SLC25A43	0.712599	MPC2	-0.235385	COG4	-0.138751			RBM24	-1.86304	CYR61	0.515	HPCAL1	0.296337	MESDC1	-0.249851			GYG1	-0.110382			NPCDR1	0.118399			MGMT	-0.0339726	NEUROG2	-0.846551	BC107145	0.189351
ZIM3	-0.103	SNRPE	0.092	TEAD1	-0.104867	LACTB	0.297186	AKAP8L	0.647238	PNMAL2	-0.484772	AMIGO2	-0.163593	GGPS1	-0.159928	BTN3A3	-0.147011			FMO3	-2.56938	C16orf13	0.779	SCFD2	-0.635501	ATP5D	-0.352693			EIF4G2	-0.0834572			POLN	0.0938054			PEG10	0.0335668	SLC6A17	-1.06271	VIL1	-0.293905
ID2	0.348	CT45A3	-0.115	SPTSSB	-0.185119	COX8A	0.350681	ERVK13-1	-0.746926	GBF1	-0.299264	MBNL2	-0.458175	MAP1A	0.124175	GTPBP6	-0.101681			OSER1-AS1	1.25482	AZIN1	0.502	PBRM1	-0.50534	FBXW7	-0.181586			HMGB3	0.091771			CFI	-0.120934			CEPT1	0.0547717	RP11-548B3.3	-0.677458	2q35	-0.293905
GOLGA8A	-0.213	PPA2	0.243	NBPF14	-0.322859	SFMBT1	-0.220921	DDR1-AS1	0.484023	SEC13	-0.356448	CLCA4	0.451955	PNPLA2	0.230987	LPAR6	-0.196335			CGA	-1.90422	RBM12B	-0.52	CAPN3	-0.389377	ZNF14	-0.157138			DIS3L	-0.0942713			DNAJC13	-0.0927487			DDX10	0.0310002	NOSTRIN	0.756804	AK300965	-0.293905
SH3BGRL3	0.367	FAM102B	-0.2	BOD1L1	-0.159169	LILRB5	0.164024	KIAA0485	0.891304	C1orf65	0.0842512	RGS17	1.18282	TM2D1	-0.158032	CNTN1	-0.0798361			DPH6-AS1	2.66106	DVL3	0.525	HAS1	0.298756	C14orf93	-0.176328			SPINT2	-0.0898016			CHCHD1	-0.108435			MYB	0.0338434	PLG	-0.658392	TPPP3	-0.447993
MPC1	-0.205	GSTM4	0.127	BRDT	0.111094	ZNF747	0.139632	CHAC2	-0.768102	FAM189A2	0.150819	PTMS	-0.44627	SLC30A9	-0.284855	TULP1	0.0889075			LOC101927798	-1.13786	GRIK2	0.694	LOC101927143	0.276557	KRT35	0.136863			ROPN1L	0.0846218			GTF3A	-0.0956644			HARS2	0.0167359	KCNAB1	-0.466161	BC000691	-0.447993
TAB1	0.132	RARRES1	-0.111	SLC25A39	0.763192	EIF5A2	-0.208847	GPR137	0.233134	LAPTM4B	-0.379184	C17orf87	0.254948	SIRT5	0.139345	PIGB	-0.158404			VASH1	-0.99708	C11orf59	0.514	CRBN	-0.425869	RTN4IP1	-0.206514			VDAC1	-0.0574158			KIAA1551	0.0883733			GFRA1	0.0219522	THY1	-0.862768	ANGPTL3	0.260583
CD40	0.162	NEK11	-0.095	ASAP1	-0.246711	MANEA	-0.236247	MAN1A1	-0.44095	METTL11A	-0.448916	SLCO1A2	0.391798	LGALS3	0.297637	MIR126	-0.103993			CYP46A1	1.48694	LRP8	0.661	SLC6A16	-0.695214	FITM2	-0.184882			IMP4	-0.0665285			TBXAS1	-0.15273			CROP	0.024826	RP11-100M12.2	-0.872538	BC058287	0.260583
METTL25	-0.183	SFR1	0.142	MIR548C	-0.138219	SLC14A2	-0.138575	ZBP1	0.534075	AP1S3	0.165842	ERH	0.241901	CCNC	-0.269487	PSMD5	-0.0818705			CDHR1	-2.24994	SYT1	0.712	PRLR	0.207112	HOMER3	0.307115			AGPS	-0.102525			CSF2RA	-0.121668			CPEB4	0.0304661	linc-CBLB-8	-0.551922	HIST1H4A	0.412917
OR2M3	0.0734	DLK2	-0.0975	DUSP26	0.116428	HEBP1	0.188475	CREBL2	0.229665	PTGER3	-0.271619	CFL2	0.754778	UBA2	-0.18391	LOC647115	0.0841782			ARHGAP32	2.36926	TNKS1BP1	0.358	44813	-0.864643	CTDSPL2	-0.216503			UBA5	-0.104817			CHEK2	0.0763225			PTRH2	0.0311744	MIR4671	-1.24702	BC066248	0.412917
YARS	-0.252	ZMYND11	-0.309	LOC100129550	-0.238663	ZDHHC11	-0.206517	PKN2	0.516324	PTPN3	-0.556159	AK5	-0.311827	PIAS1	-0.300258	PPP2R3C	-0.0925831			STMN4	-1.46938	TUBG1	0.55	IRGC	0.332445	ARRB2	0.311277			WRB	-0.107767			VCAM1	-0.220708			SFI1	0.0509167	RTN3	-0.500209	HSPA1B	0.30255
GGACT	-0.2	C1orf174	-0.186	RLN2	0.150003	FAM26F	0.628678	TMEM9	0.313007	TDGF3	0.172733	PTPN21	0.871725	CHCHD3	-0.173322	LOC100130507	0.0959959			NPBWR1	-0.868371	GABRA5	0.929	NRAP	0.24623	ERP44	0.119169			UNC93B1	0.0597913			APOL1	-0.143343			INSRR	0.0731563	NREP	-0.431007	HSPA1A	0.30255
SIN3A	0.141	TANGO2	0.196	C3orf49	0.118682	DNA2	0.157241	WSB1	0.591984	SIRT1	-0.384644	FAM190B	-0.34616	RANBP3	0.172947	ONECUT2	0.0735523			IGHG1	0.800078	MGST2	0.641	G3BP1	-0.442954	WHAMM	-0.191518			ZBTB16	0.165476			SNORD30	-0.187655			MGC26856	0.0290949	VPS41	-0.279559	BC063507	0.30255
GK5	-0.273	STAB1	0.273	HPN-AS1	-0.143033	PLEKHG5	-0.1556	CLEC4C	0.538565	FBXO42	0.374455	CAPN10	0.191427	TM2D3	-0.194275	ITIH2	-0.202171			WNK3	2.04234	LILRB3	0.549	PARD3	-0.396334	ITM2C	-0.187445			AP3M2	-0.119179			TAS2R10	0.118434			BRAF	0.028662	MAP3K9	-0.824265	BC018740	0.30255
PDCL3	-0.235	RPPH1	0.561	PPP1R3F	0.132056	KRTAP12-4	-0.138334	CTSK	-0.313012	WDR85	0.207882	LYSMD1	-0.387125	PDE3A	0.170421	LAMTOR5P1	-0.145279			LOC645485	-2.57713	HSD17B7P2	-1.28	NDUFS7	0.246332	STK26	-0.178781			RGCC	0.161616			OLFML2B	-0.0802521			MYLIP	0.0237409	NPSR1	-1.09743	CCDC90B	0.168837
TEAD4	-0.0809	IFT74	-0.248	POLR1D	0.215909	FOXH1	-0.14372	PHTF2	-0.332086	IGH@	0.1019	FLNA	-0.232923	WDR61	-0.224713	TEX13B	0.0941269			CDKN2C	-1.01709	SLC17A2	0.541	LOC101929460	0.24387	DDX18	-0.276675			DGAT1	-0.0686368			CALCOCO2	0.138239			GFRA3	0.0440164	SLC25A19	-0.402469	AF271782	0.168837
PKIA	-0.263	NOS2	-0.118	LHX3	0.118456	ZNF682	-0.494567	TLR8	0.588936	ILDR2	-0.597414	MYST4	-1.0431	ELAVL4	-0.36014	C6orf106	-0.0783619			ESPN	1.46012	C1orf210	0.6	CEP41	-0.602133	GSPT2	-0.268447			EIF3K	-0.0571526			MID1	0.201556			COPS3	0.0345096	SLC14A1	0.837293	ZMAT2	0.285331
SNRNP70	-0.228	EIF5A	0.359	FAM99B	0.105225	MAGED4	0.177812	DICER1-AS1	0.861375	INMT	0.0801757	TIA1	0.958551	MPHOSPH8	-0.374101	MAPK10	-0.112941			ARHGAP28	1.90193	TAS2R13	-1.16	ACTN3	0.250143	MLLT3	-0.310257			RABL3	-0.109615			HNRNPCL1	-0.0787653			C15orf32	-0.0503276	TPX2	-0.533737	BC056668	0.285331
WDR47	-0.143	ZMYM1	-0.168	LINC00965	-0.110663	TFG	-0.160185	CCIN	0.37258	IL20RA	0.136637	PHLDA1	0.733298	ENDOU	0.156342	KBTBD2	-0.0835789			GDAP1	0.731758	C12orf10	0.575	CD209	0.206489	TCF3	-0.169953			RABIF	-0.0664488			RHOXF1	0.0940404			TMEM55B	0.0388943	RP11-6O2.4	2.00912	PSD3	0.266919
CD151	0.132	CCNC	-0.182	R3HDM4	0.464576	SMG8	0.137279	DNHD1	0.317787	AP1G1	-0.212023	TYROBP	0.54172	PPP2R3C	-0.290216	PHB2	-0.0803604			FBXO36	2.28735	C1orf198	0.734	ADAMTS10	0.42899	U2AF1	0.175228			PRMT2	-0.0809514			HIST1H1T	-0.159459			GNB5	-0.0336327	RP1-16A9.1	-0.902069	BC011238	0.266919
ITPKC	0.138	FAM131C	0.115	ALG5	-0.202776	C2orf27A	-0.18016	FAM71D	0.564205	LONRF1	0.287267	BAMBI	0.499912	TMEM126B	-0.232925	WDR48	-0.0893087			PLPPR1	-1.40536	UBQLN4	-0.531	C12orf49	0.28516	KIAA1652	0.156624			XPO6	-0.0470995			KCNJ8	-0.0848087			DPM3	0.0148714	HTR2A	-0.892188	CDC37	0.272553
WDR90	-0.0969	ZFP64	-0.107	KIAA1324	0.171274	GATB	0.184209	TNFSF10	0.81684	LEKR1	0.0882328	ADCK2	-0.661094	TTPAL	-0.209799	TCF4	-0.0727741			CASC2	-1.593	TIMM17B	0.604	GFI1B	-0.77931	HAUS5	-0.250213			GRIK1	-0.156446			GPS1	-0.0602832			BCKDHB	0.0184801	GPR123	-0.776219	BC000083	0.272553
CRYBB1	0.0823	TMEM150B	-0.15	CHRNA1	0.120153	FAM161B	-0.190099	CHAD	0.491706	NBEA	-0.218054	HMOX2	0.74141	MBNL1	-0.25447	NBEA	-0.0831117			COG2	0.905006	BEND2	1.23	LOC101060400	0.304141	LOC100507311	0.123708			SETD9	-0.102555			JPX	0.145973			INPP5A	0.0294529	C11orf21	0.730451	MIR1181	0.272553
HSPA1B	0.458	CCNH	0.175	CEP72	-0.141724	MAN2A1	-0.145379	IBSP	1.05851	PRR15L	0.121402	PGAP1	0.576644	RARB	-0.209546	ZNF585A	0.104338			SNX21	1.72186	KALRN	0.692	ZNF597	-0.362493	FAM212B-AS1	-0.301035			PDE7A	-0.180957			DDX19B	0.0677049			ANKRD45	0.0191517	TMTC1	-0.603847	FKBP11	-0.222622
AGPAT2	0.218	CPVL	0.411	COPS3	0.25877	PLTP	-0.165048	CDC20B	0.300581	NEXN	0.371493	MGAT4C	0.704857	CA10	-0.265215	PRKAA1	-0.0753139			SLC26A3	-0.945648	ZNF43	-0.666	TTC9B	0.256028	GPR132	-0.206227			SCG2	-0.205205			NDUFS3	-0.102439			RCHY1	-0.0491095	AMIGO1	-0.628269	BC048292	-0.222622
SNCAIP	0.0975	MXD4	-0.372	SIRT5	-0.15248	ADAM15	0.30234	SPIDR	-0.264535	ZAK	0.214288	ZADH2	-0.746365	GTPBP4	-0.245519	S100A2	0.0975343			SLC2A9	1.77212	VCL	0.392	MTFR2	0.280297	CLEC4G	0.215782			TMEM246	-0.0581			PHKG2	-0.0906744			SIX4	0.0527889	SORCS3	-0.377989	SPINT2	0.211671
HSFX1	0.0983	TENM3	0.107	GEMIN4	-0.311426	REXO1L2P	0.126686	CDK10	0.34417	RAD21	-0.254081	C7orf46	0.971765	C5orf45	0.132339	INSL4	0.0813007			ATP10A	2.10758	KIAA1539	0.544	A2M-AS1	-0.959232	DPH5	-0.261675			C8orf48	0.0876833			DALRD3	-0.0589594			LENEP	-0.0420297	RP11-631M6.2	0.782751	BC001668	0.211671
NDUFA6	0.247	SLC6A12	0.18	SRRM5	-0.164335	PACSIN2	0.29417	ERV3-1	0.440941	TBX19	0.126136	CLN3	-0.219133	PNMAL1	-0.271698	NRXN1	-0.0845873			LOC101928333	-1.92099	RAB4B	-0.811	USP24	-0.488871	MCM7	-0.144225			ZFYVE19	-0.1045			TRA2B	-0.0934024			RRS1	0.0367279	AGER	0.700319	IL6	0.255413
CDC16	-0.298	TATDN3	0.195	SPEF1	-0.121589	APMAP	-0.286366	LINC00671	0.842824	RBM4	0.502878	FAM40B	0.680184	PART1	-0.214763	DCTN6	-0.0949071			HNMT	1.31079	ACAT1	-0.859	UBE2I	-0.566322	SOX11	0.113473			LINC00951	0.0698397			EIF4E2	-0.0920114			DLX2	0.0569503	B4GALT5	-0.436244	7p21	0.255413
RBKS	-0.112	ARPC5L	-0.201	TPBGL	0.128384	SDHAP1	-0.15917	IL6R	0.751577	DDX41	-0.513557	RASSF3	0.52806	GCDH	0.154863	FHL1	-0.0912083			DRD1	2.22521	PIWIL1	-0.721	CEP104	-0.38268	TMEM161B	-0.190818			TGFBR2	-0.0960497			YIPF4	-0.110818			ESR2	0.0319103	PCSK2	-0.848936	PMAIP1	-0.301436
OSBP2	0.755	LINC00152	0.138	CPNE7	0.152475	TRIM41	0.155043	DSTYK	0.473669	ALS2CR4	-0.36748	PAX8	-0.255123	VIP	-0.183067	NCSTN	-0.108607			TMC5	-2.12981	EIF4G3	0.888	STON2	-0.970552	LINC00881	0.143688			VEPH1	-0.453525			ELOVL6	-0.152769			CPA4	-0.0193311	RAP1GAP2	-0.890025	D90070	-0.301436
ZNHIT6	-0.161	CHFR	0.281	P2RX6	-0.123885	ATL3	0.184357	SLC33A1	0.262515	AGXT	0.119681	BCL2L13	-1.30206	SOD1	-0.188326	KIAA0895L	-0.147861			CPLX2	-1.73843	C2orf84	1.59	CIRBP-AS1	0.279814	AKAP1	-0.233314			COG4	-0.168152			ZNF124	-0.163171			TMEM70	0.0389906	GAL3ST3	-0.633963	TPTE2P2	-0.239324
RNF32	-0.102	NR5A2	0.0874	STXBP1	0.0951924	GBAP1	-0.177034	USP37	0.389762	ERBB2	0.131306	NDUFS2	-0.171949	CHN1	-0.224067	ZFP64	-0.0983517			LOC285556	1.69611	CPNE4	0.685	LOC101928207	0.280605	ZNF101	-0.192194			SRL	-0.0773865			SAMSN1	-0.129518			PPP2R2D	-0.0592273	CHI3L1	0.670715	THSD1P1	-0.239324
KEL	-0.0824	ARSF	0.126	VPS13B	0.133423	SGK3	0.285346	MOBP	0.690619	RPS6	-0.369246	Septin 6	-0.521376	IQCA1	0.128446	XKR3	0.0908375			LINC00935	0.907911	CDKN1A	0.666	CELF2	-0.930836	TSSC4	-0.220723			TERF2IP	-0.11086			CTSL	-0.0972579			MAPK12	0.027709	AMACR	-0.662919	TPTE2P3	-0.239324
DUSP1	0.401	PSMB1	0.168	PCAT18	-0.125071	CD93	0.315673	LOC105374366	-0.408839	NKAIN2	0.185741	FBXO10	-0.583409	KHDRBS3	-0.193795	ULK3	-0.0924437			LINC00927	-1.88535	IGSF10	0.578	TCP10L	0.276914	EEA1	-0.261155			TMEM222	-0.0537736			UTP3	-0.123259			IGSF4C	0.0189308	RP11-307P5.1	-0.782739	THSD1	-0.239324
GAP43	0.0997	DPM2	0.134	IFT22	-0.105617	TEFM	-0.167342	NUDT16	0.242796	SHC3	-0.458422	C9orf72	0.74676	PDP1	-0.488567	ZNF613	0.0949166			TMEM54	2.05291	C10orf119	-0.547	CNTNAP4	0.304511	AEBP2	-0.247267			FAM136A	-0.139703			GNG5	0.126933			RXRB	0.0317011	RP4-641G12.3	0.735226	AB044385	-0.239324
PCBP2	-0.154	CRY1	-0.319	GLB1L	-0.152141	GDNF	0.154038	P2RX4	0.365026	PSAP	-0.278632	COPS5	-0.4139	TTC19	-0.223664	COX15	-0.120834			UTS2R	-1.88685	AXL	1.11	RPL37A	-0.657827	TP53TG5	0.214267			TXNIP	0.180557			KLHL3	-0.118387			ADHFE1	0.0174652	RP11-467L24.1	-1.05668	AY833561	-0.595745
PRCD	0.0958	UGDH	-0.22	CLEC18C	-0.11865	KCNK7	-0.160182	MTUS2-AS1	0.715108	LOC100132005	0.11588	CWC15	-0.98502	CHST8	0.214677	MTIF2	-0.099574			TMEM79	-0.684983	C7orf54	-1.43	ZWILCH	-0.607208	EIF2AK4	-0.133389			CYP4X1	-0.13119			SMG6	0.0711798			CAMK2N2	0.0465548	RP13-259F12.2	-0.664257	AF251053	-0.595745
NUDT22	0.165	SCN3A	-0.109	ELOVL3	-0.141924	MIR1286	-0.180774	TSPAN8	0.611422	KCNC3	0.118525	SRGAP2	1.06768	ERCC2	0.172061	MYO5A	-0.0741515			LOC102723493	-2.12118	RNF41	0.607	CRTC3	-0.710277	SDR39U1	-0.16222			BPGM	-0.106325			PRMT6	-0.0923971			TBCC	0.035025	LPPR4	-0.685944	PYGL	0.212995
MYOF	0.18	SCYL3	-0.191	DRD3	-0.0951444	PHF21B	0.156042	TRA2A	0.589805	EHF	0.159876	AHCYL1	-0.64928	TCEB1	-0.222522	NAPB	-0.0879214			SPTY2D1-AS1	-2.12546	SPPL3	0.392	CCDC7	0.282894	CDK13	-0.187478			PPP1R7	-0.0755853			MYCBPAP	0.0769185			AGMAT	0.0331267	PRKAR2B	-0.623382	BC095850	0.212995
ACSS3	-0.097	USP54	-0.111	IL1RL2	0.133654	OR2S2	0.279446	METTL15	0.392666	NDUFA4	-0.247299	C1orf49	-0.184364	MREG	-0.320662	BCKDHA	-0.104107			TUBB1	-1.76972	MIIP	0.742	B3GNT9	0.291961	TRAF3IP1	-0.238961			NDN	-0.10535			LRP11	-0.0669028			PPA2	0.0270615	FBXL20	-0.242297	MMP9	0.543718
VCPKMT	-0.232	SP7	0.149	USP33	-0.225054	TLE2	-0.160042	NPAS2	-0.655593	STMN1	-0.290224	SEL1L3	-2.17725	ZBTB32	0.186426	LINC00994	0.104539			GPNMB	2.60204	JAZF1	0.873	CDC14A	-0.719026	SHOX2	0.145886			STX4	-0.0750996			KCNN2	-0.0865068			COL10A1	-0.0375297	CHML	-0.525132	BC006093	0.543718
CTSA	0.311	C11orf63	-0.18	NDUFAF4	0.249766	ADD1	-0.263535	TACC1	0.546847	UBE2V1	-0.161921	CIAPIN1	0.43984	TRIM62	0.118308	DNMBP	0.0905486			PVT1	-0.647171	SYTL2	-0.993	SYN1	0.32988	ROBO1	-0.159022			C12orf43	-0.0821168			SNX17	-0.102498			PEX5L	0.0226454	CTB-36O1.7	1.82399	AK123156	0.543718
MED1	-0.117	OTUD6B	-0.121	ACADL	0.135448	HCCS	-0.151904	ATP6V1H	1.03038	EMG1	-0.611806	C4orf48	0.750926	LZTFL1	-0.275762	FBXW5	-0.0684715			RBMS3	-2.19939	BCKDK	0.504	HOTTIP	0.216294	CCDC88C	-0.233865			HSPA8	-0.065279			SACM1L	-0.163811			NDUFV1	-0.0401423	RP1-310O13.12	-0.807814	LOC100128028	0.543718
PAX7	0.131	EMC1	-0.183	RCBTB2	0.342827	SHMT1	0.320594	ZBTB47	-0.29344	ENTPD6	-0.520907	FZD7	0.317665	UBL4A	-0.156981	SAE1	-0.0635462			LOC102546299	-1.78078	MERTK	0.567	MMP28	0.293614	CLIP2	-0.284179			ANK2	-0.0811597			NLRP14	0.0992492			DGKE	0.039807	ATRN	-0.317101	GPA33	0.259369
MS4A1	-0.304	CCDC34	-0.296	SH3GLB1	0.224368	BHLHE22	-0.147813	TMPRSS12	-0.58309	EZH2	0.15362	NCRNA00085	-0.265105	BCAN	0.221133	DKK4	0.106276			ZNF674	2.18862	PF4	0.734	PPP2R5E	-0.349508	CD300LG	0.130491			ALKBH6	-0.0585195			ADGRV1	0.285828			ZNF581	0.0707662	FJX1	-0.687173	BC069789	0.259369
YIPF3	0.183	ARF5	0.205	ERCC4	-0.124466	UBE2Q2	-0.28854	PAK2	-0.633822	COMMD2	0.483172	GKAP1	-0.981973	TNFRSF10B	0.131362	MCAM	-0.138283			PP2672	-1.00081	FAM124B	1.03	YPEL2	-0.595054	PROK1	0.140724			WDR54	-0.100313			GPR34	-0.209733			KISS1	-0.0342031	SLC7A4	-0.933394	ZNF331	0.278487
TSPAN13	-0.28	PSEN1	0.178	AKR1A1	0.253024	PFKP	-0.301725	ERN2	0.616992	BBC3	0.111977	MRPL55	0.689366	PRKD2	0.105722	LSAMP	-0.127826			CAST	-1.5811	GIF	0.557	AACS	-0.321899	ELFN2	0.138508			VPS51	-0.0975598			PLAC8	-0.170406			Kua	0.0332506	PTPRN	-1.02559	BC009433	0.278487
OTC	-0.109	RNU1-3	0.603	SGK1	0.627912	ZNF626	-0.209912	ZNF609	0.298482	AGRP	0.0740997	C1orf83	0.908605	DSTN	-0.198679	EPRS	-0.0683067			ATP1B4	1.43206	NOC2L	-0.518	IRF5	0.565188	PDAP1	0.344963			C12orf10	-0.0722699			SLC44A2	0.176887			HBG2	-0.0507644	FAM126B	-0.427902	AF251515	0.278487
NAA25	-0.152	SNORA73B	0.106	INTS9	-0.163119	PIK3AP1	0.381185	IFI44L	-1.23603	ZNF616	0.246214	C5orf4	0.547079	SSB	-0.19316	MAGEC2	0.0881013			DPEP3	1.61924	CD48	0.746	DGCR2	0.39658	UBFD1	-0.168966			DAPP1	-0.0753146			GRIK1	-0.208586			COX6A2	-0.0669301	SLIT2-IT1	-0.83243	AF272148	0.278487
CSAG1	0.115	TMEM41B	-0.409	SPATA31D1	-0.11991	CLEC4F	-0.244558	ZNF311	0.551618	SLC8A3	-0.609625	UPF1	0.565067	GPNMB	0.358179	R3HDML	0.0880989			APBA2	-1.22849	BAT3	0.547	GATAD1	-0.416385	ANAPC10	-0.152056			LRP4	0.127645			GPAT3	-0.202505			C1orf33	-0.0375113	HSPE1	0.530367	AF412403	0.278487
FAM20B	0.153	GPX1	0.419	ZAN	0.0920476	TMEM63B	-0.221858	EPDR1	0.456241	CNTN3	0.37839	SLC17A5	-0.621672	GSTM1	0.208248	SEH1L	-0.0892225			PRPH	2.37102	TSC22D2	-0.915	ZAR1	0.211978	NDUFA2	-0.139734			TRIM38	-0.112499			KLHDC10	0.0864011			FLJ20422	0.0258491	TMEM35	-0.588902	AF412398	0.278487
OR13F1	0.0841	MIS12	-0.173	STMN1	-0.130682	URM1	0.232172	SUFU	-0.258963	NCRNA00219	-0.359546	NARS	-0.304053	CD59	0.227559	ERC1	-0.0702173			SLC28A2	-1.88155	CSMD2	0.657	UBXN10	0.310691	HEMK1	-0.160976			PSMD1	-0.0878825			TDP2	-0.140941			RBM24	0.0442238	DOPEY2	-0.355199	AF412400	0.278487
SLC46A3	0.204	ERC1	0.166	CBFA2T3	-0.127891	GOT1L1	-0.216099	NLRC4	0.520192	MKKS	-0.418108	P2RY11	0.552685	ITGB5	0.175599	SNX17	-0.0756391			FSTL4	0.689772	C1orf128	0.84	SAP30L	-0.500673	NUP35	-0.273498			GLUL	0.128347			PDGFC	0.112549			C1orf80	0.0199471	TRHDE	-0.730444	HSD17B8	0.188137
ADIPOR1	0.48	AIM2	0.397	CSPP1	0.140147	NR4A1	0.160299	C10orf76	-0.703821	GOLM1	0.263487	RAD21	0.389076	MLXIPL	0.223377	TRIM37	-0.0634518			TES	-1.97896	COL15A1	0.568	ESF1	-0.621979	POU5F1B	0.183147			METTL21C	-0.105896			NR1D1	0.170104			E4F1	0.0181288	SCN2A	-0.77376	BC008185	0.188137
UNC13A	-0.0983	CHD1	-0.237	TMPRSS11B	0.125887	DSTN	-0.15753	R3HCC1L	0.27796	AHSA1	-0.219477	PCDHGA10	0.447973	TGM1	0.15724	LOC100128356	0.101466			AP3B2	-2.1243	CISH	0.542	SMA4	-0.907778	MAN1B1	-0.148455			CECR1	-0.160577			TNNT2	0.129269			ZZEF1	0.0401412	TENM3	-0.615976	MYADM	-0.357341
NASP	-0.148	ACER2	0.173	CPA5	0.193209	SLC39A8	-0.157528	ROPN1	0.323112	QARS	-0.417584	RIC3	-1.74102	GNE	-0.218898	TCEAL2	-0.095559			C4orf22	-1.17763	BRIP1	0.805	FLJ35934	-0.565488	PPP2R5E	-0.192651			FERMT2	0.126338			C15orf56	0.0769958			MGC14141	0.0421434	C9orf69	-0.454821	BC095412	-0.357341
PLCB2	0.333	KLRF1	-0.654	SLC25A20	0.276378	CLEC12A	0.559248	NPAT	0.504594	FAM19A5	-0.205361	NTRK2	-0.328629	LOC440792	0.16907	ARHGAP21	0.0874837			NRDE2	0.614414	TAF9B	0.752	RRP12	0.635809	CENPH	-0.24654			NUDC	-0.057021			ADGRA3	0.213647			TRIM9	0.0155192	JAKMIP1	-0.805944	JTB	0.158945
RAB39A	-0.0839	VWA8	-0.147	FOXH1	0.105299	CBX1	-0.269243	S100B	-0.843397	C17orf77	0.0896774	FSTL3	0.188424	CCDC93	0.148251	NHEJ1	-0.134139			IL13RA2	2.1959	ATF5	0.781	GALK2	-0.667552	ASCC1	-0.169963			AVPI1	-0.0772633			C17orf58	0.0720055			RNF40	0.0429853	DCTN5	-0.295287	RAB13	0.158945
ZNF428	-0.218	RNF123	0.18	C2orf57	0.118251	TMEM200A	-0.186843	FRMD6	-0.795658	DEFB126	0.084309	PKMYT1	1.0679	GPR153	0.179346	SRSF7	-0.139663			ITPKB	1.0929	CCNG1	0.606	IGHG1	0.246745	ATP7A	-0.225731			MMADHC	-0.172743			CENPC	0.103989			VPS18	0.0955889	OLA1	-0.394212	BC004239	0.158945
P2RY14	-0.112	PHF5A	0.184	APLP2	-0.192954	MIF4GD	0.142874	PAXBP1	0.259087	RHBDF1	0.104893	GABRG2	0.299107	PTCRA	0.178248	MRPL3	-0.064173			ADRB1	2.18081	VPS25	0.439	FAM84B	0.300143	UBE2I	-0.215454			CHST2	-0.0876958			AOC2	0.0877191			OSBP	0.0189666	CSDA	0.820223	AK128675	0.158945
ZZZ3	-0.165	GTF2H2C_2	-0.121	BRI3BP	-0.280558	SP110	0.231529	NEK7	0.408604	TTLL4	0.181591	CKAP2	0.968168	NDUFS2	-0.16376	HIST1H3F	0.160759			YME1L1	2.0382	ADAM6	1.32	HAUS2	-0.523132	EPHA1-AS1	-0.311752			DLGAP5	0.056004			MBTPS1	-0.0888618			RLN3	-0.0591071	REEP5	-0.437125
PFN4	-0.109	SOCS3	0.223	DNAJC28	-0.0958734	CARD9	0.476305	FARP2	-0.252717	CDCA4	0.119907	SYT1	-0.131733	CISD1	-0.273034	TSPYL4	-0.0873665			LOXL2	-1.29504	MAP3K6	0.774	ARHGEF7	-0.399765	LOC101927851	-0.362938			TMEM100	0.0896239			AKT1S1	-0.0732655			SLC17A5	0.0367804	SNAI1	0.906098
RPN2	-0.286	FAM13A	-0.123	CLDN3	-0.1179	ARHGAP17	0.23683	WDR48	0.213093	CARD6	0.08346	BAT5	-0.525395	ERGIC2	-0.263493	FLJ20712	0.127137			TNFRSF11B	2.65861	ZNF678	-1.01	LOC642852	-0.438319	C12orf43	-0.184655			PIP4K2B	-0.0578895			SPRY2	-0.123218			GLG1	0.0387834	MIR556	-0.733521
SPIN4	-0.159	RUFY2	-0.129	NDUFS2	-0.209644	SRY	0.163768	LSM14B	-0.261798	COX7A2L	-0.151538	GPM6A	-0.164817	ORC4	-0.226139	MIR320A	0.0790647			DISP2	-2.09668	SPTBN5	-0.567	FBXO11	-0.550953	MAP1A	-0.373864			KCNN2	-0.0969522			LIPG	-0.122172			SRGAP1	0.0267032	AL031666.2	0.95813
PPIH	0.167	ZNF322	-0.112	A1BG-AS1	0.102832	DNASE2	0.21391	MYRIP	0.325539	ALCAM	-0.539664	ARFGAP2	-1.66385	AGFG1	-0.182837	SMAP2	-0.0657269			PGM5-AS1	1.18104	STRAP	0.676	ZNF37BP	-0.621037	LINC00094	-0.283171			RCAN2	-0.106897			SMARCB1	-0.0567335			SEMA3C	0.0289411	TMEM229B	-0.422045
LINC00339	-0.245	C21orf33	0.184	MMP16	-0.130708	ASGR1	0.314509	ILDR2	0.579584	TMEM87A	-0.435546	TAOK1	-0.325672	LRRTM4	-0.188867	VPS4B	-0.0871708			ZBED3	-0.955424	ZNF70	-0.805	SOX21	0.335578	MTX3	-0.274534			CCNDBP1	-0.143382			ORAOV1	0.066626			RASSF8	0.0217191	MCOLN2	0.616281
WNK1	-0.138	FANCD2	-0.108	ANTXR1	-0.135339	KIAA0355	-0.283573	EYA4	-0.563823	MRPL33	-0.298883	NHLH2	0.285386	TMEM50B	-0.29648	HDHD2	-0.111321			FGF12	-1.33401	SLC26A1	-0.619	LINC00675	0.287791	CHD6	-0.210918			DNAJC8	-0.100288			CASP7	0.109151			LANCL2	0.0501251	HEG1	0.506109
EBF4	-0.086	TMBIM6	0.31	OR14I1	-0.116481	LINC01096	0.172564	CSF3R	0.498657	BCL2L13	-0.628461	TMPRSS11D	-0.195358	NBN	-0.191543	TAZ	-0.0673547			HOXD13	1.46626	GSK3A	0.495	WDR55	0.323686	WDYHV1	-0.27663			PPP2R1A	-0.112912			TM6SF1	-0.236666			ATP9B	0.0223466	FER1L6-AS2	-0.75945
SART1	-0.0997	ZNF212	-0.336	MYCL	-0.148061	TKTL2	0.150676	LOC101929378	1.03132	LOC100287222	0.103514	CDV3	0.691531	GULP1	-0.309247	RGS3	0.0570493			RHOA	-2.47371	KIFC2	0.738	IREB2	-0.845294	HNRNPU	-0.0927255			OSBP2	-0.0988416			KIAA1161	0.19515			C20orf151	-0.0381365	AC091878.1	-0.754496
TGIF1	0.165	PPP6R2	-0.331	AMELX	0.125795	GPR146	-0.24017	CEP120	0.279036	BTBD7	0.279853	TFEB	0.293957	CALB1	-0.433244	SERP2	-0.110269			WRNIP1	-1.99096	PACRG	0.968	USF1	0.802822	DNAJA3	-0.159517			FXR2	-0.0842202			MRPL34	-0.0713613			LOC90826	0.0389541	PGK1	-0.466168
RAC2	0.247	CHL1	0.126	JUNB	0.598914	SH2D1B	-0.409251	CCZ1B	0.468451	ZNF343	0.305578	AMPD2	-0.409082	PRDM10	-0.178275	IGSF1	0.105363			GLS2	0.98218	MCTS1	0.561	VPS16	-0.19452	C19orf70	-0.244108			ZCWPW1	-0.0933009			PPP2R3A	0.170517			PSMB4	0.021876	RPL30P13	-0.732984
TAZ	0.134	MGST1	0.0916	MARCH2	0.399683	FILIP1L	-0.169219	FGD2	-0.806139	BTBD3	-0.518363	RAB21	0.411865	IDH3A	-0.48177	NINL	-0.140744			RGS9	1.48176	BAK1	0.542	PRAF2	0.381403	NAA60	-0.212538			OPTN	-0.0536312			MED29	0.057374			CTRC	-0.0499797	LPPR5	-0.436309
BRD4	-0.108	AQP6	-0.103	METTL21B	-0.132998	ARL17B	0.305054	FGD1	-0.204841	TBL2	0.111861	RIOK3	0.785518	PCDH1	0.210644	DNAH12	0.0924759			FAM110B	1.80938	CMTM7	0.38	TMEM200C	0.280178	RCOR3	-0.212134			MT1HL1	0.0939101			SRRD	-0.0842931			GLT1D1	0.0491677	DRAM1	0.430686
LINC00626	-0.0961	ICE1	-0.166	AFAP1-AS1	0.124277	MAP1LC3A	-0.191724	PRAC1	0.373982	MBNL2	-0.272248	AGAP2	0.354284	MRPS17	-0.225032	NR4A3	-0.314274			RNF32	-1.01104	CNIH4	0.708	APBB2	0.192024	C6orf136	-0.174687			UBL7	-0.0805307			LAMTOR4	-0.0615122			C1QTNF3	-0.0755838	NDN	-0.32157
RNF217	0.123	RPL39	0.131	VOPP1	-0.163027	SEMA5A	-0.169113	CARHSP1	0.645396	PAOX	0.292847	EIF4E	0.521069	PMPCB	-0.189177	PRKAA2	-0.115316			DOCK5	-2.68061	ZDHHC20	0.816	HAND1	0.335241	STK17A	-0.243303			SNTA1	0.112745			SLC26A11	0.0652131			TRUB2	0.0400416	PKMP3	-0.389177
CCDC96	0.0908	HSCB	-0.448	CARNS1	0.283677	NSUN5P2	0.158313	DCAF5	0.435151	CRYAB	-0.275369	PRR23C	-0.173327	PRKRA	-0.250693	PPP3CA	-0.105488			LOC100129620	1.92642	ZNF33A	-0.552	ARHGAP21	-0.716597	WDR37	-0.239298			TTLL6	0.0879395			TLR8	-0.0656816			EPRS	0.0271613	EXOSC10	0.310639
NSUN5P2	-0.121	SUCNR1	0.165	TBC1D10B	0.375199	RNU1-1	-0.433714	ZNF775	0.464363	OGDHL	-0.307594	TMEM188	0.985867	ICAM3	0.150157	ELP5	-0.0957324			ITGB5	2.16428	ZNF236	1.43	LOC401261	-0.368196	DENND6B	-0.170623			FUS	-0.117583			FBXO45	-0.123665			DEGS1	-0.0505547	STIM1	-0.373682
POFUT2	0.153	OR1B1	-0.102	CELF3	0.122814	GSN	0.198306	SLC26A1	0.416978	PALMD	0.107282	PM20D2	0.9943	NECAP2	0.187325	MAP6D1	-0.0977434			ODF4	-1.14537	PCTP	0.591	LINC00536	0.246161	BCAS4	-0.24522			RPL7L1	-0.0924545			STATH	-0.0724886			TTC16	0.0798105	RP11-51G5.1	-0.838989
DDX59	0.176	LRRC10B	-0.196	F11	-0.140384	CDH7	-0.137708	COX6C	-0.168846	SNX18	-0.297684	KRT84	-0.21209	MORN1	0.204224	NPR2	-0.110254			LOC100996286	-1.70699	PWWP2B	0.606	CCL28	-0.393961	CR2	-0.328998			ANAPC5	-0.0988511			OR52A4P	-0.0765532			SPRY4	0.0234052	CCK	-0.932235
PTGES2	0.176	PCDHA7	0.137	ZNF525	-0.148178	DOT1L	0.174263	PTK2	0.682243	MDC1	0.169283	RAB5B	0.839128	PPP1R13L	0.17547	ZSCAN16	0.139904			SNRPN	-0.691974	ARF1	0.374	WHSC1	0.493175	RNF216	-0.124008			ZNF653	-0.122792			MFSD1	-0.108847			PIK3R2	0.0663418	NAP1L2	-0.664991
EHD4	0.163	PPFIA1	0.149	SNORD56	0.123753	ABHD13	-0.206001	ANKUB1	0.958976	ARMS2	0.109658	IQSEC3	0.591258	NCOA2	-0.153776	KLHL13	-0.199581			APMAP	-0.618334	ORMDL2	0.467	NLRP5	0.384716	NCOA5	-0.197111			CRIPAK	-0.212717			PSMD14	-0.119639			RBP1	0.0400167	SNAP47	-0.489164
RNU4ATAC	0.424	TBC1D31	-0.215	CSE1L	0.22937	FGF21	-0.145059	LOC101928516	-0.902129	SERPINF1	-0.429504	PRDX5	-0.334135	MRPL39	-0.14394	TMEM196	-0.105403			OVOL2	-1.81901	HIBCH	-0.827	DUSP3	-0.318414	SCARB1	-0.19433			RSRP1	-0.155844			PLA2G1B	-0.0735017			SPDEF	-0.0357549	RP11-771F20.1	-0.703959
KRT1	0.261	U2AF2	-0.169	PPP6R2	-0.133408	RPA1	-0.263261	DPH6-AS1	0.995565	CHST7	0.301888	GOLPH3L	0.66114	AASDHPPT	-0.216814	CNTNAP4	-0.178569			DCAF10	0.843524	RRBP1	0.68	ATF7	0.286499	METTL10	-0.262131			RMND5B	-0.0956731			METTL4	-0.108909			BARX2	0.0194295	RP11-526J3.3	-0.730205
SLC9A7	-0.228	PANK2	0.116	MLX	0.192781	MYBBP1A	0.182663	LARP4B	0.712943	YAP1	0.216992	C9orf64	0.706512	PLCB3	0.177604	NBPF7	0.0877701			SLC1A7	-2.27844	SLC6A11	0.728	DLX4	0.252395	TIGD1	-0.229834			BTK	-0.0951754			MFSD13A	-0.0684072			TBL3	0.0147815	MIR5704	-1.25263
OR4C45	-0.0967	SBF1P1	0.109	ACVRL1	-0.174584	ZNF483	-0.62605	LOC100996724	0.657672	C8orf44	0.23621	BCAT1	0.616553	PTPRO	-0.342154	TTC39B	-0.182625			UNC13D	-0.835065	MATN4	0.424	MTMR14	0.238721	ISCA1	-0.188908			RIDA	0.10394			SCRG1	0.172587			GPAM	0.0408416	SLC27A4	-0.377631
GALNT5	0.0739	ETV6	0.147	SETD7	0.114386			LOC101927018	-0.740197	SYNE2	0.0781468	SRRD	1.0165	HSD17B14	0.226696	SLC6A15	-0.106758			CELF2	0.597681	PDZK1IP1	0.669	BPIFB1	0.274743	FLJ32255	-0.316493			LRP11	-0.0709442			CCT7	-0.102862			EIF3S6	0.0254466	WNT7A	-0.437317
CYP2C9	0.104	RRAS	0.349	ZNF326	-0.110786			ZNF208	-1.36975	CLEC2A	0.100575	CAPN7	0.824636	SOBP	-0.239019	SCN2B	-0.161001			LINC00908	1.0805	CDYL	1.18	LOC105377468	0.271259	NDUFA11	-0.186281			TRAPPC3	-0.0961721			HELQ	-0.0776009			NNAT	-0.0594448	CLIC1	0.568757
BCL2L1	0.625	OR4M2	0.125	PEX1	0.165177			RNF187	0.669259	PDGFB	0.154613	MATR3	0.388005	CTF1	0.162805	ATP6AP2	-0.0747635			LOC105377832	1.94566	ASB4	0.495	SLC52A3	0.324979	IFITM10	0.175564			SLC25A46	-0.0810393			GPR137B	0.124107			SLC7A6	0.0411461	CALM1	-0.518258
AGER	0.0941	RBKS	-0.141	OR9Q2	0.133243			KNDC1	0.265283	ACER2	0.207744	CLDN6	0.233366	SLITRK5	-0.290951	BLOC1S2	-0.0847457			SIVA1	-0.644642	TET1	0.967	ENDOV	0.286261	AOAH	0.199744			GOT1	-0.128992			BET1	-0.109719			ATP6V1B2	0.0191876	ITGA11	-0.764764
DDX47	-0.15	FAM168A	-0.155	MICAL2	0.205781			LINC00567	0.639407	OIT3	0.11725	ZC3H18	-0.776395	GSPT2	-0.259548	CALY	-0.0736789			C1orf87	-2.59199	RNASEN	1.2	MALAT1	-0.861131	ZWINT	-0.255484			AKT1S1	-0.0549718			ZFP90	0.0583431			TBC1D10A	0.0451782	SLC9A7	-0.507015
LILRA4	-0.183	MAGEB6	-0.148	RHOJ	0.107303			HAL	0.763277	HLA-DQB1	0.0899383	C9orf6	0.961644	YARS2	-0.116822	MIR200B	0.104532			PCSK1N	-1.4109	FAM160B2	-0.452	DBT	-0.53182	PARP10	0.157994			TACO1	-0.0544726			DEPDC1B	0.0742833			TAS2R1	-0.0372068	CXXC4	-0.339098
CR1	-0.0898	PPARGC1B	0.187	RCN2	-0.190501			SLFN11	0.972316	NOS1	0.113975	PLEKHH3	-0.232877	SCN1A	-0.351702	HERC6	-0.138363			CELF5	-0.656804	C1orf190	0.474	CHRNA1	0.246616	CLDN3	0.141602			SUMO3	-0.0683134			OR2AE1	0.106025			FOSL2	0.0265305	KIFAP3	-0.413831
YBX3	0.362	FAM25A	0.114	MIR1468	-0.119132			THSD7B	-1.15835	CRISPLD2	0.100142	CEBPD	0.91226	NDUFS4	-0.224955	GMNN	0.148711			DPP6	-2.00635	WDFY4	-0.46	PANX2	0.337123	RHNO1	-0.250884			MAOA	0.152984			CDC42EP4	0.140018			GPR92	0.0566405	RP11-242P2.2	0.535785
LHX3	0.075	RASEF	0.0861	FOSB	1.22216			UBE2U	0.859872	KLF4	0.175236	ANKRD9	1.28175	XRCC5	-0.214099	NAP1L5	-0.112896			GHRH	-1.46002	RHD	0.946	ZMYND10	0.38777	TRIM25	0.292725			GNG12	0.132392			FLJ20712	0.0860267			CCNT1	0.0396574	NPTX1	-1.04612
PSMB3	0.203	MMD	0.554	MYH9	-0.276505			RBM41	0.303698	PLEKHN1	0.150289	OSBPL6	-0.764534	DOCK3	-0.272335	PTPN2	-0.0914229			ZNRD1ASP	0.920281	ABLIM1	-1.5	HELLS	-0.678604	MLX	-0.175564			TPK1	-0.074908			BEND7	0.110368			ETFB	0.0240444	TUSC2	-0.413891
FOXE1	0.111	SH3KBP1	-0.272	ACADVL	0.293587			CRELD2	-0.248178	MAP2K5	-0.529756	KIAA0368	-0.5766	NDEL1	-0.238504	ITIH4	0.108246			CTLA4	2.36346	KIAA1841	1.61	TRIM33	-0.814507	JKAMP	-0.208902			VPS4B	-0.099687			FERMT2	0.206305			C6orf111	-0.0281606	BCDIN3D-AS1	-0.438691
CRSP8P	-0.296	USP1	-0.18	PLCG2	-0.309881			UNC119B	0.700678	MLL4	0.104836	C14orf2	0.232517	SLC3A2	0.153236	HNRNPU	-0.0568363			LINC00167	-1.79689	ANKS6	-0.8	ZNF330	0.448711	FCGR3B	0.141061			CCDC91	-0.0835413			TMEM257	0.107822			CCM2	0.0423268	TMEM223	-0.381575
MKNK1	0.228	GAGE2C	-0.111	CSF2	0.135331			FAM45A	0.775955	DPP6	-0.221295	MPPED1	0.994696	RBP1	0.276515	EIF2A	-0.0930704			WISP3	-2.72188	ANKRD10	-1.09	RRBP1	0.341785	PRRC2A	0.397402			RAB14	-0.0852875			ATP6AP1L	0.135125			CRHR1	-0.0404875	SYNGR3	-0.977525
ACAD8	-0.211	HINT2	0.214	FBXW8	0.0881609			SART3	0.414281	FAM83C	0.128801	ST8SIA5	0.429387	TRPC1	-0.234402	BCO1	0.0939447			CAPN6	1.27761	RNASEH2B	-0.884	BORCS8	0.391502	ANAPC7	-0.247672			NDUFS1	-0.0831696			C1QC	-0.18905			KREMEN2	0.0212626	CYP26B1	-0.778896
EGR1	0.824	GPR12	-0.105	GLYAT	0.119308			JDP2	-0.311944	MAN2C1	0.143973	CHMP4B	-0.37204	YIF1B	0.155591	CEP72	0.0807345			USP42	1.6311	CDC25A	0.787	TNFRSF25	0.316774	ADPRM	-0.149122			EFR3B	-0.0633621			ZNF680	0.115008			RHPN2	0.017636	TTC9C	-0.284722
GPR119	0.0914	CLTCL1	0.151	SNORD22	0.147571			UBE2H	0.240881	RGN	-0.411987	RTEL1	-0.224054	SERPINA10	0.159727	LOC284009	-0.0869946			CFL1	2.37886	IPO4	0.533	TTLL10	0.275871	KLHL42	-0.215836			B3GAT2	0.0846061			CPSF4L	0.123764			SLC1A5	0.0358427	CHRNB2	-0.966635
CYB5D1	0.117	BCL3	0.354	MRPS34	-0.196959			SGK223	0.40221	GIT1	-0.1889	GPR85	0.642919	FUT2	0.175851	TRPC5	-0.195633			ERAP1	0.819797	CYB5R2	0.639	PCIF1	0.59118	C19orf60	-0.227575			EFNB3	0.108918			SERPINB11	-0.07611			DCC	0.0179645	TSPAN2	-0.665419
KRTAP13-1	0.109	SLC35B1	0.189	SYNPO2L	0.109974			COL8A2	-0.441539	PTPRCAP	0.11296	LGMN	-0.427271	PPM1B	-0.205222	CACNB1	-0.0908147			MSH3	-0.654161	PGRMC1	0.814	LOC158402	-0.53707	HOXB5	0.168757			OGN	-0.322519			ZNF676	0.213748			LOC221955	0.0351239	PCDHA5	-0.499717
MCOLN2	0.35	TCEAL8	-0.22	FGD2	-0.382651			CHSY1	-0.339204	PRAMEF10	-0.0609776	RMI1	1.11668	PTPRE	-0.181338	NDUFS2	-0.0866074			LINC00665	-1.74707	MDM1	1.03	GPR45	0.272312	AMPD2	-0.218886			EPN1	0.0636466			JMJD4	0.0600484			MSRA	0.0407499	PPME1	-0.406958
TAC3	0.11	SNAPC1	-0.122	TAC3	0.145772			ZNF185	0.557893	LOC402377	-0.0996358	CARD9	0.337441	ACAA2	0.216587	ZNF576	-0.08267			LOC100507431	1.81671	ACVR2A	0.782	ZNF764	-0.26895	SIN3A	-0.210693			C20orf96	0.0741007			GRAMD2	0.0766811			RB1	-0.0399243	EIF4E2	-0.250879
NEK3	0.127	SCP2	0.129	PUS3	-0.220829			TBX3	-1.10655	ATP6V0E2	-0.187399	MAT2A	-0.83033	EAPP	-0.23479	PRSS3P2	-0.165098			RGR	-2.11949	MPP5	-0.712	CD300LB	0.75812	CYP4V2	-0.331362			THG1L	-0.0984036			CLCN4	-0.17127			KCNE1	-0.0304721	WHAMM	0.212901
B3GNT4	-0.0853	FSTL4	-0.127	FAM3A	0.287289			B4GALT5	0.266121	TMPRSS9	0.114575	LOC100133106	-0.230693	KMT2B	0.173207	TIAM1	-0.0598908			PAPPA2	1.54328	NFKBID	-0.352	SLC25A25-AS1	-0.343872	MYL12A	-0.240025			CNTNAP4	-0.185364			OR13C3	0.102645			C1orf166	0.0333695	FITM2	-0.319261
LEMD1	0.0974	OLR1	-0.114	MINA	-0.109358			TMEM181	0.619054	ANKRD27	0.320455	SERAC1	0.660117	NNT	-0.292967	NAAA	-0.107186			LOC729887	0.799163	RND3	0.527	VASH1	0.342428	HMCES	-0.20411			HSPA5	-0.10529			ALG13	-0.0813843			KPNA6	0.0199261	LDOC1L	-0.305819
PTPN6	-0.11	TUBB4B	0.319	HCCS	0.155303			ADAMTS18	0.93408	AK2	0.1119	TUSC2	0.604609	ZCCHC14	0.17784	SIDT1	-0.218951			CEBPE	-1.46399	SLC2A5	0.752	ZNF514	-0.884342	NPTXR	0.164756			NPAS3	0.100185			MIR181B1	0.118391			ARRB2	0.041332	ILDR2	-0.407038
ARL17A	-0.222	ATF7IP2	-0.146	AIDA	0.227138			PAPOLG	0.321617	CD4	0.10233	GAPT	-0.161998	SOCS1	0.13739	RAB3A	-0.0808105			XCL1	-2.00049	C19orf28	0.458	PSTPIP2	-0.562571	MSR1	0.150651			SUCLA2	-0.115492			ARL5B	-0.110454			FLJ20054	-0.040177	DGKH	-0.44313
DYRK2	-0.217	ARHGEF7	-0.165	NSUN5P2	-0.157114			F2RL2	-1.64756	GRTP1	0.0946875	SLC39A4	0.750421	TXNL4B	0.15953	ATCAY	-0.11096			LINC00620	1.70109	ATP5L	0.809	APLP2	0.387187	DISC1	0.231851			BOP1	-0.0886796			CHID1	-0.0526218			UFD1L	0.0172811	ACSL5	0.623196
LOC389332	-0.0842	COL4A5	-0.0798	ITK	0.296379			HHCM	1.12535	IDH3B	-0.396282	OR8K3	0.293889	ADNP	-0.24032	RNH1	-0.0931827			KLK12	-1.17694	SKA3	1.8	SPPL3	-0.312538	EFCAB13	0.155028			SYTL3	-0.0723619			SECISBP2	-0.0875312			DACH1	0.0514642	PCDH1	-0.519082
CR1L	-0.101	ZNF277	0.245	SNORA31	0.215618			NPY5R	-0.374455	ZFX	0.510201	USP31	0.850686	NFATC4	0.123396	MYL7	0.0826813			POLR3B	2.33754	ZFYVE1	-0.748	KIZ	-0.306576	TFDP1	-0.269898			TMX4	-0.100642			CARS	-0.103984			CD300C	-0.0373572	CEP19	-0.466138
ACTN2	-0.11	ZNF830	-0.227	ATF6B	-0.187973			UBAC2-AS1	-0.895018	SORT1	-0.325652	SNRPC	0.312237	GDI2	-0.164477	TMEM25	-0.0751521			KLRC3	1.64924	KRT13	-0.447	CD48	-0.525673	CYCS	-0.265503			NNMT	0.068737			SFXN5	0.166641			RAB2B	0.0348777	PLEKHG2	0.451114
SMARCD1	-0.135	FREM3	-0.13	USP3	0.19303			C7orf49	0.258194	IL20RB	0.127343	UBE2E3	0.27934	PAWR	0.195644	PRMT2	-0.115316			KCNK15	-1.24536	RFC2	-0.601	MTSS1	0.255422	CIAO1	-0.137438			RASSF3	-0.0706308			CYP24A1	-0.106182			PRNP	0.0278563	SCN3B	-0.959423
RAB25	0.0957	FABP4	0.154	SPECC1L	-0.307978			HOXC6	-1.92571	SCUBE3	0.128568	NUMB	0.329665	MT3	0.211674	NREP	-0.155844			CTTN	-2.21923	BTF3	0.61	CROCC	0.489364	RNF167	0.198361			SCOC	-0.0949237			TXNL4B	0.122943			SLC4A5	-0.0559278	linc-HMGB2	0.569315
CDC42SE1	0.232	FCGR1A	0.505	FILIP1L	0.137235			IDH1	-0.283891	CD84	0.159408	PRPSAP2	0.648623	HLF	-0.308643	NELL1	-0.139797			GET4	-1.76769	CYP4B1	-0.621	DDX50	-0.737031	ATF6	0.160677			DYNC1H1	-0.0789149			LDHA	-0.180004			TKT	0.0205493	AC022154.7	0.741835
MRPS31	-0.229	LINC01567	-0.442	OR8U8	0.106614			TOR1AIP2	0.36012	NCAM1	-0.480665	TGM4	-0.210815	CASKIN2	0.142528	MAP6	-0.104346			BHLHE40	-0.555173	ZNF75A	-0.851	B3GNT8	0.52636	TEX10	-0.169334			ERCC2	-0.0695548			NDUFA1	0.107299			CLSTN2	0.0192575	CHL1	-0.507059
SNORA11D	0.128	MAX	0.257	PGM2L1	0.20603			ZBED3-AS1	0.859293	METT5D1	0.471548	CDA	0.174286	ITGA10	0.1301	PDHA1	-0.0922138			C10orf35	1.9327	ACOT7	0.616	SEMA7A	0.266523	CEND1	0.130428			RMDN3	-0.0653685			RASAL3	-0.0812659			ZNF198	0.0221165	RP11-204E9.1	-0.79973
ALOX12	0.239	OLMALINC	-0.114	CFD	-0.58675			PGK1	0.650766	IGF2R	0.420983	NLRC4	0.192205	DUSP12	-0.199104	UAP1	-0.0908712			ADD2	1.11267	ELMOD3	-0.51	CEP44	-0.349826	RBM7	-0.194942			SLC11A2	-0.100623			TEAD1	0.11815			SPAST	0.0341685	MT1X	1.01771
LLGL1	-0.2	FAM98A	-0.281	NANOS1	-0.119788			NCLN	0.946167	RALGDS	0.129092	TAS1R2	-0.154445	FAM214B	0.145603	DYNC1H1	-0.061235			LCP2	-0.640791	ATXN2L	-0.474	TMC3-AS1	0.329058	ZNF567	-0.275982			MYL6B	-0.0481206			TTC23	0.122548			PPP1R12A	0.0293194	SNORD116-11	-0.578975
CSNK2B	0.291	NRIP1	0.243	ACKR4	0.151243			ARL15	-0.257728	ADIPOR2	0.352739	UBE2F	1.00936	IRX5	0.1424	HCN1	-0.107913			CDK13	0.905117	TDRD9	1.01	DOK3	0.391168	SERINC2	0.150114			OR2T6	0.0996628			MED8	-0.0907554			C8orf55	0.0161745	U2	0.820594
RNF165	-0.341	SMIM23	-0.143	SLC26A5	-0.137624			RAB3B	0.790761	ST3GAL1	0.137077	VSNL1	0.133688	VPS26A	-0.156939	ACTG1P17	0.0954789			FCER1G	-2.15873	GJB7	-0.812	TMF1	-0.590774	NOSIP	-0.257007			EXOC3	-0.0478576			MAFB	-0.0858302			RPL5	0.0187685	RPL39	0.924833
ZNF638	-0.142	C10orf105	0.128	NR6A1	-0.121947			LOC105379178	0.874255	KHNYN	0.10863	C1orf120	-0.204278	HSF4	0.157625	NDRG3	-0.0968786			PMEL	-1.29289	RAD54L	0.455	F11R	0.482946	MAK16	-0.187357			LAMB3	-0.0877695			APPL2	0.107887			RBKS	0.027592	TIPARP	0.444141
UBE2I	0.0965	C21orf58	-0.483	AMY1B	-0.359484			VPS13B	0.751213	OR2M4	0.155367	LOC100129932	0.695124	NDUFAF1	-0.181577	JKAMP	-0.0808181			TLE6	-1.38782	NPEPL1	0.422	ABCC8	0.357238	IKBKAP	-0.13707			DNAJA4	-0.135077			SERPIND1	-0.124365			ALX4	0.0344138	ADCY1	-0.776548
FBXW8	-0.14	SERF1B	-0.126	PRPF38A	0.172968			RABGAP1L	0.649225	C6orf221	0.103905	CPNE5	-0.670939	SERTAD3	0.136647	GNRHR2	-0.0860937			FBXO32	-1.64757	TESK2	0.473	MROH2B	0.25804	GPR161	0.13508			IL13RA1	-0.144027			U2AF2	-0.0576496			USP25	0.0259803	ASB4	0.76589
AAK1	-0.206	HSD17B10	0.18	VPS13A	0.121358			GNA12	-0.272411	CD82	0.096193	RNF111	-0.911505	SLC1A4	0.267503	U2AF2	-0.0895832			DSG4	1.56275	KIAA1797	-1.03	ZNF536	0.304018	SLC7A1	-0.248757			BCAS2	-0.0974383			LRRCC1	0.132955			HADHB	0.0427006	SNORD113-5	-0.870586
SMPDL3B	-0.106	HEATR9	0.105	PLN	-0.118023			RSU1	-0.456176	SCP2	-0.439381	NHEDC2	-0.775058	CCT4	-0.22355	FLJ45079	-0.112583			KLHL14	-0.937967	SPINT1	0.65	SRSF6	-0.40175	TLK1	-0.252587			OXCT1	-0.130917			CST3	0.175743			C11orf17	0.0268698	MIR381	-1.13187
GJB1	0.089	TMEM176B	0.502	LOC105370941	0.142185			GALNS	0.643048	C19orf44	0.159205	ARL4D	-0.530758	DPT	0.154373	HMGB3	0.129502			CTGF	-2.49818	LRP5L	-0.848	WWTR1-AS1	0.355331	KLHL6	-0.31012			CNIH4	-0.0975965			RPPH1	0.182475			NDUFB5	0.0152959	EIF5A2	-0.445895
PTPRR	0.154	LY6G6F	0.183	DUSP11	0.206389			CHI3L1	1.07732	TXNDC6	0.2862	SENP8	1.18549	USP8	-0.20409	MRPL1	-0.101131			KLF16	-1.04336	PRKCSH	0.45	EPOR	0.363038	ACE	0.136531			PAFAH1B1	-0.0926499			ZNF782	0.0884645			POLR2G	-0.0378724	SCAND3	-0.660801
PANK2	0.0897	ZNF333	-0.143	DDX59	0.219118			WNT9B	-0.631934	MLC1	0.177197	CMBL	-0.93719	DCXR	0.229545	NNAT	-0.220455			ZNF500	-1.63184	NFIX	0.746	GMDS-AS1	0.266126	TRUB1	0.148747			AP1S2	-0.0891395			PSMD7	-0.113052			CNN2	0.0493578	MEF2C	-0.758903
SIGLEC6	-0.194	ACTR2	0.213	BORCS7	-0.266633			ETFBKMT	0.319173	MED14	-0.381212	C8orf33	0.850094	SDPR	0.219448	CLRN1	0.0797687			GRIN2A	-2.60547	STX1B	0.788	WIPI2	0.376502	RCCD1	-0.164312			UBE2M	0.0507108			SDHB	-0.0850904			GNAT2	-0.0212456	ZFC3H1	0.332024
NDUFAB1	-0.19	MYF5	0.134	SHARPIN	0.219706			PCMTD1	0.285331	RPL5	-0.258148	PRR5L	0.40173	TOMM20	-0.265063	VBP1	-0.133411			DYRK3	-0.623778	SCN3A	-0.806	SLC6A8	0.374215	SPOUT1	-0.18985			HSCB	-0.0619434			FGFRL1	0.10041			ZNF286	0.031231	MRPL49	-0.285139
C16orf70	0.131	TGFBI	0.401	INO80D	-0.105837			PITPNA	-0.326577	UBB	-0.108775	MAGEB10	-0.146068	BCAP29	-0.300157	NEURL4	-0.06084			POLG	-1.84344	SP2	-0.755	GATM	0.282333	TRIM16L	0.151036			PLRG1	-0.109985			SRSF6	-0.114431			ARFGEF2	0.0190502	GPR158-AS1	-0.663811
CCDC18	-0.121	SNORD22	0.142	WNT5B	0.123883			HSF1	0.529544	SUMO1	-0.208798	ALG13	0.471577	ZNF219	0.124419	HIST1H2BA	0.099527			PIGR	-0.975739	CDT1	0.51	NYAP1	0.261086	CDC42BPA	0.148298			PPME1	-0.087436			TRMT1	-0.0619578			C21orf59	0.017517	FAM196A	-0.421567
MMAB	0.123	GGA2	-0.319	PGAM4	-0.354951			KMT2A	0.276789	ZC3HAV1L	0.330096	SLC25A39	-0.692396	SRSF7	-0.190891	SPTBN2	-0.12022			SLC17A4	2.1883	C2orf79	0.739	MAATS1	0.290391	DYSF	0.324164			PMVK	-0.0523245			SLC4A4	0.312393			KM-HN-1	0.032189	RP11-313C15.1	-0.870115
EIF2AK4	-0.489	SCYL1	0.368	ATXN3L	0.112907			SPPL2C	0.592663	LYN	0.115861	MYH8	-0.15681	ALDH3B1	0.125061	CMSS1	-0.103607			SPERT	-0.87465	TOMM70A	0.563	FAM185A	0.345398	CDC23	-0.195658			VMP1	-0.0639401			PSMC3	-0.0818022			PP2447	0.0382413	SAP30	0.368109
MARCH7	0.326	LIMS3	0.105	EIF2S3	0.304267			LOC100288123	0.499718	PPFIA1	0.505434	SAR1B	0.878046	TPP1	0.122702	CLEC7A	-0.136838			ITGA8	-1.89583	PFDN6	0.563	HNRNPM	-0.385567	EDC4	-0.134204			C8orf4	-0.0786417			CPB2	-0.0856392			FAM89B	-0.0260977	CTNNBIP1	-0.388948
PDK4	0.383	CEP83	-0.152	TRHR	-0.178507			RABEPK	-0.336385	WFDC3	0.135739	POLR2F	-0.790854	CACNA2D3	-0.360889	NXPH1	-0.133407			DIS3L2	0.678626	CABLES1	0.64	LOC101928277	0.236659	IGLL3P	-0.419759			CYFIP1	-0.0620658			APOBEC3F	-0.0917227			C11orf47	-0.0398153	LIMK1	-0.705182
TNPO2	-0.246	TTTY9A	0.128	ZNF200	0.0967554			FLI1	-1.32735	ST6GALNAC6	-0.166516	SMC6	-1.15595	LDB1	0.203052	DBF4B	-0.0894309			PARK2	1.75604	SCPEP1	0.677	RFFL	0.229778	NBEA	-0.239634			SDCBP	-0.0589842			GIMAP4	-0.151996			C20orf173	-0.03223	MCF2	-0.435648
YPEL4	0.0812	ATP5A1	0.188	CYB5D1	0.154615			MED27	-0.295708	CPNE8	0.455476	PAPOLA	1.17986	C1orf61	0.221773	GK2	0.115835			LOC105373942	1.63438	GPR124	0.793	CRIPAK	-0.424956	SLC1A3	0.156154			FBXO27	-0.103931			LIMD1-AS1	0.169253			GNRH1	-0.0354707	ADTRP	-0.802155
DEUP1	0.0785	CD7	-0.502	PLA2G16	-0.410901			CD248	-0.424831	TSPAN16	0.16138	PIGR	-0.173219	ATP9A	-0.188266	KSR1	0.101363			NCR1	-1.51435	CYorf15B	-0.936	NECAP2	-0.372224	LINC00672	0.185014			MIR219A2	0.0666043			PTAFR	-0.0677012			MGC33530	0.0456018	ARF4P4	-0.800723
RAB35	-0.292	PSMC2	0.224	KCNG1	-0.278725			ZNF692	0.179519	DSCR3	-0.351795	ECM2	-0.181376	DMPK	0.217633	CD83	-0.105527			MYO1B	-1.81042	RPIA	1.24	OCIAD1	-0.367202	SMIM7	-0.127168			TMEM14C	-0.0838062			SETD3	0.0475353			AKAP7	-0.0529675	DECR1	0.335605
MTFR1L	0.171	ARNTL	0.116	RANGRF	-0.505741			PARP15	0.713722	CXorf36	0.124038	MAP7	0.61168	TNS2	0.180962	PSEN2	-0.0893875			CD4	-1.79509	IL21R	-0.454	EID2B	-0.488861	FAM45A	0.129555			SARS2	-0.0797664			WFDC12	-0.079381			MAGEL2	-0.0323872	NFKBIA	0.501472
ATN1	0.121	MSH4	-0.105	TSLP	0.117166			DKFZp547J222	-0.610406	TMPRSS11B	0.0757567	OR5K3	0.180809	MBNL2	-0.194164	SLC51B	0.0932356			PITPNC1	-2.36421	SGIP1	0.587	FAM3D	0.393898	HELZ2	0.202389			CUL1	-0.0969239			TMEM164	0.0955603			SLC16A1	0.0207959	NUDT11	-0.750307
AGBL4	-0.0932	TRAP1	0.18	BOP1	-0.356243			MIF-AS1	0.379151	PRPF40A	0.450129	PPIL3	-0.937598	PSMD10	-0.205714	SEMG1	0.0918628			SESN3	-1.72441	MED25	0.488	FHL1	-0.724157	RAP2B	-0.172559			AASDHPPT	-0.113821			MCRS1	-0.0764275			PPP1R3D	0.0443577	RELA	0.370647
CHFR	0.212	NDFIP2	-0.151	PTPN7	0.18269			MAGEE2	0.498434	TMEM38B	-0.336647	CD151	-0.228083	COL14A1	0.108816	SPG21	-0.0795311			PGLS	0.845106	MARK3	0.602	SDPR	-0.971213	ZNF818P	-0.388697			OAS1	-0.082023			MSRB2	0.0493277			LEO1	0.022104	SHFM1	0.457296
HMGN1	-0.21	LINC00320	0.145	EGR2	0.829964			TMEM30A	0.231279	WBP5	0.260196	AGXT2L1	-1.23232	SPATA20	0.189438	KISS1	0.0771248			TDRP	-1.41953	C17orf28	0.966	RPL36A	-0.513899	ZNF844	-0.303353			NAXD	-0.0773528			RNVU1-17	-0.0917068			DDX56	-0.0489111	ADD2	-0.89995
DICER1	-0.298	ACVRL1	0.102	ZADH2	-0.23965			GJD4	-0.469226	RRS1	-0.529853	RPS6KA1	-0.322576	ETNPPL	0.61462	MIR125B2	0.0896036			CDHR5	1.05716	ZNF646	-0.627	ISX	0.24668	RPRD2	-0.157912			BLOC1S2	-0.1148			PPP2CB	-0.0715269			ASCL2	0.0345755	CLTB	-0.48868
ARRDC3	0.119	KANSL1L	0.157	LMO3	0.15061			USP24	0.740337	SNN	0.216465	SLC44A5	0.88008	SIGMAR1	0.162139	TMEM242	-0.0874374			TMEM86A	1.72795	ZNF215	0.581	CDH26	0.303893	METAP2	-0.191401			MDK	0.075364			USP6	-0.0677085			TMBIM1	0.030099	AMPH	-0.760047
AKR7A3	0.102	AAK1	-0.252	TM2D3	0.257025			PPIA	0.249637	COX8A	-0.330465	SPATA2	0.861243	C2CD5	-0.206218	OXTR	0.100651			TFB2M	-2.75205	MFAP3L	1.04	LRFN1	0.388274	DNAJC14	-0.189869			EAPP	-0.11438			PCDH15	0.1467			SULF2	0.0665996	GSTM5	1.06422
P2RY1	-0.0962	RNH1	0.296	WSB1	-0.248416			WFDC11	0.817153	SBF2	0.602032	RYR2	-0.747778	TRIP12	-0.163646	FOLR2	-0.0967248			ARR3	-0.607059	SEMA3G	0.515	IL16	0.23574	NFX1	-0.154218			CPT1C	-0.102661			DNMT1	-0.0710507			FCGR1A	-0.0414377	SNORD114-28	-0.747445
CCDC169	0.0846	G6PD	0.116	MIR496	-0.138324			CANX	0.363794	MED24	-0.58522	SLITRK3	-1.03382	SLC4A1AP	-0.238687	NAGK	-0.119623			PPP1R2P9	1.20195	C7orf41	0.438	ARHGAP19	0.262328	ARHGAP23	0.164555			AIG1	-0.103388			REPIN1	0.062657			MAP2K6	0.0429444	SLC25A12	-0.435118
TRMT5	0.168	KLHL38	-0.127	QPRT	-0.143652			LOC285423	0.92143	SUCLG2	0.182921	HLA-C	-1.2591	PAMR1	0.282977	OR4K1	0.10373			COPS8	0.774421	ZNF44	-1.11	ATP6V1B1	0.29176	PDIA3	-0.173287			EIF1	-0.0607466			ZKSCAN4	-0.0801961			PGM2L1	0.0392991	THRB	-0.621681
LINC01547	0.0851	MMP25	0.361	DNMT3B	-0.0946804			CD109	0.358004	TMEM66	-0.145602	SNX19	-0.927321	ASIC4	0.161736	C16orf89	-0.142425			NCOA6	-1.70735	ERGIC3	0.626	SIRPB1	0.592071	BCLAF1	-0.230973			ARMCX3	-0.085049			CDK12	0.0738594			RAB26	0.0229069	GNAZ	-0.355711
MIR551A	0.117	GCLC	0.159	LOC100996671	-0.12138			GSPT1	-0.245666	GPM6A	-0.102198	HNRNPD	-0.297339	TOP2B	-0.193296	LINC01165	0.138818			PCAT19	-1.04093	MTMR2	0.822	CSRP2	0.310835	GCC1	0.173222			FBXW5	-0.0517885			PLK3	-0.108929			PUM2	-0.0308432	SEL1L3	-0.359102
CERS2	0.173	USP47	-0.158	NTRK1	0.134888			KLF1	-0.817243	CCDC91	-0.214583	TMEM198	-1.16488	SEC63	-0.227386	IPP	-0.146969			KCNJ11	-2.29433	FRMD3	0.608	PRICKLE1	-0.675591	NFATC4	0.191727			CAV1	-0.0914506			DNAH7	0.155703			LSM3	-0.0365757	AL132709.8	-0.554336
IDH3B	0.218	ZNF563	-0.21	SNX1	0.184086			SOX7	0.308	RTN4	-0.111215	ZCRB1	0.425013	FLNA	0.21875	SPATA6L	-0.155965			LRRC3B	-1.44333	DDA1	0.492	ATF7IP	-0.559776	RPP30	-0.281811			ATP5D	-0.0523728			EEF2K	0.111426			RPL7	0.0636097	UROS	-0.41345
DNAJB3	0.105	KRTAP13-2	0.132	SPNS1	-0.460655			ZMAT1	0.903465	SERF2	-0.302429	RANBP3	0.428423	ARFGEF1	-0.188528	TERB2	0.0861271			LOC339622	-4.21253	PPP1R10	0.502	LOC286359	0.246783	ZNF638	-0.162341			PRSS3P2	-0.161994			NR3C2	0.0993847			MS4A8B	-0.0239674	GTF2IRD1	0.27633
ZKSCAN3	0.114	CCP110	-0.231	BEST3	0.131249			CXADR	0.398944	MCTP2	0.0768323	OPLAH	-0.202298	ZFAND1	-0.275961	ERI2	-0.104935			FAM69B	-0.714301	FTH1	0.567	FBLN1	0.354909	CXorf36	0.174959			CENPBD1	-0.116582			PTN	0.156499			FAM26C	0.0182584	OR6A2	-1.04835
FSTL3	0.0877	CDC16	-0.377	SULT1A1	-0.153108			SPEF1	0.304771	PLEKHG4B	0.123024	ZPLD1	-0.14175	PSD4	0.174308	PARP2	-0.0953089			FAM215A	0.818734	PLA2G4A	0.989	MCHR1	0.243663	ZNF708	-0.252904			GTF3C3	-0.102653			CTDSPL	0.086019			CYP2J2	0.0511381	RP11-274B21.1	0.452802
FGL2	0.275	FAM188A	-0.176	TOMM34	-0.426021			CRTC1	0.309407	LRRK1	0.186394	HHLA1	-0.182384	MAPKAPK3	0.14661	IQCG	-0.100916			FKBP10	-1.10463	PDE8A	0.677	NEU3	0.281929	ILVBL	-0.211862			DSTN	-0.146378			LOC100507388	-0.125065			ACIN1	0.032472	SNORD114-22	-0.856677
PPP6R3	-0.154	ZAK	0.289	C6orf222	0.146191			ALDH1A3	-1.44393	BOD1P	0.105301	C5orf62	-0.36804	CRCP	0.164833	MORN4	-0.100146			FUT6	0.916796	CD99L2	0.99	TERF1	-0.431858	ARHGAP18	-0.511114			ASAP3	0.0598451			CTNNB1	-0.0696358			ZNF703	0.0607445	snoU13	-0.63155
CDON	-0.0992	PART1	0.126	SPACA5	-0.0763021			HTR2A	0.407994	ADAT2	0.161666	MR1	0.257381	TMSB4X	-0.171165	RABIF	-0.099978			RBMS2	0.688391	GTPBP2	0.536	COMMD4	0.304069	STOML1	-0.190839			SERPIND1	-0.185071			PDLIM7	0.0736186			PLCZ1	-0.0315979	MT1M	0.877385
INTS2	-0.153	DNMBP-AS1	-0.113	PCSK1N	0.102288			LINC00488	-0.941311	TAP1	0.456933	SPANXN1	-0.139726	TCEAL1	-0.18802	PRNT	0.0972857			SPATA17	2.51233	NBEAL2	0.502	SSBP1	-0.461653	PNMA1	-0.270123			ATP6V1A	-0.121893			ECI2	0.0956364			DLG1	0.049246	TTC5	-0.271201
COL17A1	0.114	GSTCD	0.102	IRF8	-0.20515			DPT	-0.579384	GOSR2	0.226275	SNX3	-0.509248	DGKI	-0.225112	GFOD2	-0.0952221			LRRIQ1	-1.9785	EYA4	-0.982	ROR2	0.243897	TBX2	0.166498			SLC30A9	-0.105117			ALAS2	-0.111978			UBE2Q2	0.0308521	STRBP	-0.479069
ALS2CL	0.0858	TRAF5	-0.334	PRAMEF14	-0.129172			NUFIP2	0.22935	ANKZF1	0.184474	ZNF333	0.512471	PPP2R5A	0.147741	LYSMD1	-0.0917798			ZER1	0.836116	RPS27L	1.03	KCTD20	-0.265649	RRP36	-0.210478			FAM98A	-0.0830918			C2orf78	0.076284			GGT2	-0.0254994	GUCY1A3	-0.384953
NR4A1	-0.101	ZBTB32	-0.122	DIRC1	0.116256			ZNF29P	-0.412279	ATP6V0D1	-0.447597	SAA4	-0.256254	YPEL5	-0.201475	TPTE2P6	-0.154203			DUOX1	-2.3412	LILRB1	0.549	ZNF506	-0.3869	BIN2	0.144404			POU3F2	0.0948986			MORC1	-0.0592904			ZNF641	0.0345333	RPL37A	0.703043
CSF2RA	-0.411	ALDOA	0.12	SLC22A4	0.272546			ANKRD22	0.297412	C7orf70	-0.345051	TFAM	0.965067	MICALL2	0.183187	MAPK8IP1	-0.0731041			LTBR	-1.20154	MRAS	0.643	EHD4	0.312724	METTL2B	-0.233916			BTF3P11	0.0705844			NEIL2	-0.0567591			PHACTR3	0.0395484	linc-ARFIP1-8	-0.650957
DEF8	0.227	YIPF3	0.232	CCDC184	-0.115698			TNFSF8	0.59071	ZNF174	-0.355936	GRK1	0.191221	KLK11	0.13423	SLC30A9	-0.0830103			OPRL1	-2.1325	FANCL	1.1	HNRNPDL	-0.338383	ZNF451	-0.171461			EPSTI1	-0.128878			ADAMTS17	0.0819453			MRPL12	0.0347311	CCDC3	-0.614691
DDX19B	0.142	CALY	-0.113	CENPH	-0.165327			TERB2	-0.785023	RAD9A	0.142044	GPATCH2	1.37436	ARAP1	0.218586	FGFR4	0.0833394			DSEL	-3.4517	DLEU2	-0.992	SNX9	-0.665158	MAFG-AS1	0.122057			EXOC6	-0.194468			SYN3	0.160365			SMBP	0.0169052	SYN2	-0.999894
FAM126B	-0.111	SMIM14	-0.594	AFF4	0.221572			GCM1	0.720488	TXNDC15	-0.367042	ABI2	-0.483423	ADCY1	-0.291927	YWHAQ	-0.0599963			LOC101928622	2.86497	NCRNA00115	-0.66	MS4A7	-0.647333	C22orf39	-0.202373			SNTB2	-0.0590376			SLC25A31	0.0754955			AR	-0.0875961	AC079341.1	-0.962904
MNT	-0.137	BRE	0.169	ARL6IP1	0.204757			HEYL	0.480981	SAMD12	0.141186	UBA1	-0.318507	LYRM4	-0.227592	PLCB2	-0.0904325			LOC643085	0.7158	PRR11	0.72	LCORL	-0.31059	BNIP3	-0.281636			MRPL58	-0.148504			DCP1B	0.0815616			HOXB4	-0.0272371	SSFA2	0.497338
CEP170	0.0895	UTY	0.174	DLK2	0.0977508			MIR4307HG	0.913992	B3GALTL	0.449449	DPY30	0.551075	PAIP1	-0.231755	ZCWPW1	-0.0960117			ETV5	-1.79884	RBP7	1.2	GUCA2A	0.357398	AMMECR1L	-0.174997			MRPS16	-0.0577176			MRPS15	-0.121634			FZD6	0.0270708	GRM8	-0.457376
MXI1	0.179	TXN	0.328	GRIPAP1	-0.102191			UMOD	0.607139	CYP2C19	0.152281	MRPS10	0.624177	CHGB	-0.400399	CADPS	-0.0794515			MAP2K2	-0.806401	CDC27	0.812	FUBP1	-0.39321	PCBD2	-0.184282			RERGL	-0.135072			PGLS	-0.0893584			KIAA0090	0.0293282	C6orf228	-0.351305
ATP13A1	-0.414	C7orf43	0.249	DHX33	-0.14532			SMIM11A	-0.214354	PRPH2	-0.479296	GALNS	-0.238618	OBSL1	0.159613	SLC27A4	-0.0772227			GXYLT2	-1.84262	SERF2	0.498	LOC728283	0.318963	WDR20	-0.211384			SLC35A5	-0.0911571			MOCS1	0.074053			FAIM3	-0.0335902	MIR616	0.666135
SRRM1	-0.194	ENOX2	0.112	RNASE13	0.103128			FRG1JP	0.569036	NFATC1	0.0892031	ZFP62	0.685479	CYLD	-0.23029	SIPA1L1	-0.12507			LOC554207	-1.71626	C6orf223	0.671	GATA3-AS1	0.316979	NDUFS1	-0.191687			ADCYAP1R1	0.0857133			CACYBP	-0.0696804			COQ7	0.021964	GS1-124K5.9	0.651421
UBE2V2	0.112	KATNB1	0.172	UNC45A	0.106235			NUDT11	-0.254995	NMT2	0.435776	ZBTB4	-0.361451	FBLN1	0.129195	GRM4	-0.153476			EFHD1	1.02531	CLPTM1L	0.549	MEDAG	0.310367	GIGYF2	-0.225104			IVNS1ABP	-0.117995			SNORA21	-0.108172			C9orf48	-0.0414282	PRPF38B	0.497892
CTBP1	0.19	MARVELD3	-0.0804	TCAIM	-0.160791			XYLT2	-0.290966	PKIB	0.45941	RNF145	1.15588	S100A12	0.162189	STMN3	-0.0841119			NUDCD3	2.54893	PIP5K1C	0.461	TTC23	0.322569	ATL2	-0.193123			TECR	-0.105264			MLC1	0.228761			SEPN1	0.0406938	HCCS	-0.403853
ARHGEF12	0.135	RCVRN	-0.148	MATN4	0.121369			FAM160B2	0.683466	IL1F5	0.0902986	LDOC1	0.525699	POP4	-0.199766	METTL10	-0.0913873			ATP6AP1L	-0.721979	MTSS1L	0.764	SLAIN2	-0.535538	ANKRD40	-0.144758			MIR126	-0.0805866			ADCY7	-0.0744266			ZNF148	0.0148349	WWC2	0.269766
GBF1	-0.0956	GLB1	0.242	PEX11B	0.242173			MRGPRX2	0.554685	AURKAIP1	-0.293208	BTBD2	0.233769	BNIP3L	-0.238277	LINC01602	0.0766584			IGDCC4	-1.94802	KCNQ2	-0.905	NEK11	0.265969	TEX30	-0.201225			ESD	-0.0880318			TIAM1	-0.16672			C20orf160	-0.0635787	BASP1	-0.805264
RHBDD1	0.124	PPP1R13B	-0.293	CCR10	-0.136362			RPS23	0.512271	RBM12	0.421482	CHMP4A	-0.781268	CADPS2	-0.373738	COQ8B	-0.0856337			LINC00865	0.781673	TJP2	0.391	ENC1	-0.696091	SMKR1	-0.296203			KCNK4	-0.0540137			THAP5	-0.0806363			MMP20	-0.0356405	RPL23A	0.512457
DNAH7	0.0904	DPF3	0.116	DHPS	0.224861			TPCN2	-0.324082	RNF5	0.111542	LTK	-0.169729	ENOPH1	-0.189098	PEPD	-0.118413			SRSF12	-1.88859	RAB37	0.61	CCDC152	-0.618656	NAP1L1	-0.271894			ABHD14A	-0.0894459			VSIG10	0.0655875			GK2	-0.039741	RSPO2	-0.681455
MIR767	-0.0971	RPRD2	-0.202	SPAG9	-0.15598			IQSEC3	0.338403	TIMM13	-0.372162	BAG4	0.482486	DDHD2	-0.171425	MIR124-1	0.167951			OTP	-0.675829	LLGL1	0.741	LOC101928823	0.197317	DIDO1	-0.146077			RYR3	0.129837			BTBD6	-0.0807395			ACTR3B	0.0246568	TBX3	0.625992
GGA1	-0.0722	SF3B1	-0.286	PEX26	0.116178			FAM134B	-0.499705	SNORD97	0.321986	AKAP10	0.64454	SLC25A46	-0.294447	CWF19L2	-0.0961597			CALCR	2.47563	C14orf2	0.74	SLC6A4	-0.641532	KLHL11	-0.140735			COPZ1	-0.108864			TM9SF3	-0.0964751			GLS2	0.0356106	RPL31	0.61236
PITPNA	0.12	SNORD17	-0.142	SLC22A20	0.145181			CDKN1C	-0.390584	ARHGEF7	-0.406132	PPP2R2B	-0.346217	MEGF6	0.153372	TMEM14B	-0.07765			NPY6R	-0.847163	COMMD9	0.396	LRCH3	-0.974802	URB1	-0.202663			SPANXN1	0.0704791			FAM126A	0.191538			HMFN0839	0.0193426	MC4R	-0.849366
COG3	-0.17	TMEM161A	0.125	AMBP	-0.0979709			RNF152	0.680243	TRAF3IP3	0.0975378	KIF3B	-0.794768	CNIH1	-0.230365	IL3RA	-0.0942925			GPR89B	-0.718251	PPFIBP2	-0.451	AGFG2	0.28753	HNRNPC	-0.14546			NBN	-0.111738			ZBTB38	-0.0973437			LTBP4	-0.0246547	GCNT1	-0.586817
PLB1	0.0839	ASUN	-0.154	LATS1	-0.111291			PNPLA7	-0.63698	OAZ2	-0.488332	HSPA8	-0.221657	DHODH	0.129696	MALAT1	0.114031			S100A12	-1.73366	ENKUR	1.35	MED31	-0.623006	GALE	0.16138			BEX1	-0.10337			MRPS34	-0.0672968			C1orf127	-0.0376178	MRPL55	-0.380691
NOL6	-0.187	CHMP4C	0.158	DDHD1	-0.167381			NOP16	0.366343	FAM129A	0.139782	PSPH	-1.36931	RAX	0.18622	ACY1	-0.0731944			INVS	2.06082	CTDSPL	0.784	WNT9B	0.262182	FOXK1	0.122454			FAM173A	-0.0594632			UROD	-0.0944625			BRWD1	0.0252342	CISD1	-0.519404
LIPJ	-0.11	UAP1	-0.214	OS9	0.24411			TBX18	-1.71751	ZNF273	0.473509	CLCN6	-0.648602	BIRC7	0.154776	TMEM14C	-0.0978323			CNTF	-2.1626	ARHGDIG	0.843	ISM1	0.280606	SYN1	0.156654			LOC400002	0.0687345			PON2	0.242796			HHLA3	0.0263241	SEZ6L	-0.431572
RNH1	0.243	EXT2	-0.124	ARHGAP25	-0.15598			XIST	0.261745	C6orf225	-0.381929	SLC25A46	0.329258	MIP	0.119594	PDP1	-0.106148			CSF3R	1.10782	KIAA0664	0.55	GAL3ST3	0.344479	CEP120	-0.170908			FAM127B	-0.0954508			GAPDH	-0.0898811			MYO5A	0.029475	GALNT11	-0.46382
AGPAT3	0.132	RASSF10	0.125	SLED1	-0.108536			PRORY	0.317631	VTA1	-0.487855	PSME2	1.11823	EIF3M	-0.288845	STK25	-0.058956			SRGAP1	1.0106	NAF1	-0.965	MED1	-0.508918	CHD9	-0.200635			GPD1L	-0.125791			GPR108	-0.0740185			FLJ13909	0.0309716	MARK1	-0.42937
CREB5	0.25	VLDLR-AS1	0.104	FDXR	0.153233			MFSD4B	0.371309	DNAJC9	0.26285	AP1AR	0.463954	BNIP3	-0.32357	MIRLET7BHG	-0.087668			LOC101927051	1.84651	FAM13B	1.04	HSPA12A	0.353907	UBASH3B	-0.219451			LRRN3	-0.13025			FDX1L	-0.0758434			EFHA2	0.0427354	ST6GALNAC6	-0.507159
MT1A	0.326	PTGDR	-0.196	ABCC11	0.127568			BCL11B	-1.10927	CDA	0.0961369	MSRB2	0.696004	SIRT3	0.119972	KRT33A	-0.11614			TAF4	-1.19102	TCHH	0.661	EMC1	-0.445611	PPP2R2C	0.130606			OPRK1	0.146179			NCAPG2	-0.0866602			RPS2	-0.0559573	linc-INF2	0.817093
RASSF3	-0.113	MAGEE1	-0.153	DNAH14	-0.147371			A2MP1	0.303838	CAV1	0.234507	POLR1C	0.503588	PRPF18	-0.26734	NHLH1	0.0807952			CAPS	-1.73817	CCDC149	0.805	DAPP1	-0.702636	SRPK1	0.301998			SPRNP1	0.054765			CLASP2	-0.101052			CHST8	0.0480011	HTR7	-0.987048
ITFG1	0.16	SNRK	-0.252	LOC646938	0.136025			ADGRL1	-0.325368	GPR172A	0.176173	PRTFDC1	0.581081	MFN1	-0.166527	AIFM1	-0.0815225			TMEM173	-1.08781	CHMP4B	0.926	SLC5A11	0.357651	KSR1	-0.219149			CRYL1	0.0720953			NAGK	-0.1009			CENPB	0.0215014	DBC1	-0.444383
CHRAC1	0.165	IRF5	0.279	ZMYM6	0.191182			SLC9A5	0.739982	KDM4B	0.12806	RDX	1.35565	TRIM15	0.146781	SLC25A4	-0.097352			SEPT7P2	0.62305	SFRS5	-1.03	MSANTD3	-0.709779	DBH	0.176005			TBC1D22A	-0.0507046			GIMAP7	-0.117293			ABHD2	0.0273542	PARD6A	-0.549222
DHPS	0.171	FOXD1	0.114	FUBP1	-0.164982			KCP	-0.525999	DHX57	0.103454	FAM131B	-0.423568	SMNDC1	-0.254129	PEX7	-0.0863063			PTPN11	-1.75444	CCNYL1	0.98	FKBP14	-0.409762	CTTN	-0.413967			THAP1	-0.144385			PEAR1	0.0806532			SCEL	-0.0764341	OGDH	-0.274336
TMX1	-0.163	CEP170	0.0988	EDNRA	0.10061			APOPT1	-0.270135	PARP1	-0.180711	KIAA1143	-0.384909	FLNB	0.170287	ANKRD37	-0.176406			ACCS	0.636474	PARP15	-1.12	USP40	-0.399261	UHRF2	-0.144568			RBM3	-0.130049			TMEFF2	-0.12297			RNF14	-0.0403219	TNFRSF1A	0.393446
ZNF197	0.125	SNAR-A1	-0.194	RFX3	-0.110863			ELF5	-0.466543	ZNF513	0.155638	VGLL3	-0.137111	MEF2C	-0.418131	TSC2	-0.0769009			IL7R	1.26986	R3HDM1	-1.03	TMBIM4	0.227405	DNAJC21	-0.238038			TMEM169	-0.0763465			DSC2	0.0882508			ACP1	-0.0491473	GPI	-0.460007
ZNF655	-0.123	RNA28S5	-0.519	FAM117A	0.252155			FAM120C	0.945026	GYPE	0.193954	TENC1	-0.384765	TDP2	-0.247951	NRL	-0.0803445			SRSF3	0.99854	USP12	1.09	JUN	0.315879	C2	0.187267			TOMM40L	-0.0598757			SLC16A7	-0.170252			CYP2F1	-0.0291249	SERGEF	-0.346273
RAX2	-0.316	PGD	0.304	STAMBPL1	0.245821			UBE3D	1.01107	KIAA0754	0.165607	C13orf23	0.229775	HLA-J	0.187992	RTN4	-0.0674569			MAP7	2.18086	REEP4	0.461	TNIK	-0.475014	ATP2C1	-0.174727			FMOD	-0.109569			C12orf65	0.0634482			ANAPC7	0.0467856	MIR300	-0.936758
KYNU	0.231	SACS	-0.151	RSPO1	-0.0872287			C19orf25	-0.251468	PIK3C2A	-0.551701	TAF1B	0.560122	RGS7	-0.2701	SSTR2	-0.145933			MARCH3	2.26648	RELL1	0.64	KREMEN1	0.378418	RAD23B	0.355602			EPB41L3	-0.0950353			MFSD10	-0.0564746			PHF13	0.0600856	MIR654	-0.990501
OR4A5	-0.113	ATXN2L	-0.147	LAMA3	-0.123143			MGLL	-0.244969	RHEB	-0.407711	ATP5J2	0.552646	KIAA0430	-0.243625	MRPL30	-0.0737758			PUS10	1.08225	AMTN	-0.461	LOC100996349	0.270873	APOC2	0.182984			SRGN	-0.170467			ART3	-0.155417			RPS23	0.0195503	SNHG9	0.930463
ZNF322	-0.0878	PPM1B	-0.17	ITGAX	-0.277562			CDS1	0.604853	THEMIS	-0.566111	RFTN2	-0.573138	NLK	-0.352017	MS4A12	0.105502			LRPPRC	-1.64192	DOCK9	-1.03	RHOB	0.299736	TMCO6	-0.189903			ARF4	-0.114639			VPS33A	-0.110714			WBSCR1	0.0304942	EXTL3	-0.377591
CHRNA1	0.092	PIP4K2A	-0.234	TMED5	0.245912			TTLL9	0.816309	FAM196A	0.444383	FTSJ3	-1.50359	DMWD	0.122147	RTN4R	-0.0853335			GBX1	-1.41293	NUPL1	0.781	FAXDC2	-1.14343	SLC22A31	0.136642			SYNGR1	-0.0641475			RPL21P44	0.1267			C1orf121	0.0182966	CHGB	-0.892301
DFNB59	-0.112	FXYD5	0.355	C6	0.121198			C21orf91-OT1	0.386426	SEMA4D	0.136933	XRCC6BP1	0.761926	MC1R	0.155707	FER1L6-AS1	0.101994			BORCS5	0.568072	SYT11	0.828	PPP1R1A	0.270818	NAIP	0.62786			TBC1D17	-0.0485094			TOMM40	-0.0764564			FLJ37953	0.0283134	RFPL1-AS1	-0.791739
MCMBP	-0.166	DDX4	0.136	GMPR	0.498233			SRSF4	0.695466	SRL	0.109883	MTM1	-1.47235	LOC101930404	-0.441898	PNPO	-0.0819041			GH1	1.5027	LOC93622	-0.419	IL36RN	0.229852	MPRIP	-0.189805			UQCRC2	-0.0833756			ZSWIM3	-0.0736182			SLC11A2	0.0822344	ARHGEF9	-0.539551
GCOM1	0.141	SMG1P1	-0.173	KIAA0753	-0.150884			MYT1L	0.624014	BCAP31	0.0958325	SF3B1	-0.474821	SNORD116-28	-0.441898	TIMM8B	-0.10564			FLJ38576	-1.12056	SLC38A7	0.495	ATG13	0.253001	SPPL3	-0.143433			LSM1	-0.0581378			GNRHR2	-0.109096			PITPNM3	-0.0584229	MYH10	-0.616654
LRRC26	-0.323	CLEC4F	-0.191	MRPL43	0.24119			PWP2	-0.335744	NTN5	0.102886	MAPK11	-0.192485	SNORD115-26	-0.441898	FBXO2	-0.0866155			HKDC1	-1.17601	RNF123	0.474	ZNF451	-0.782011	DLEC1	0.173966			SNAPC5	-0.150632			SIDT2	0.0984478			ITGA1	0.030027	ARFGEF2	-0.324566
YPEL3	0.331	RASGRP1	-0.299	APOL5	0.117356			ZNF503-AS2	0.941807	EGFR	0.231457	FAM155B	0.232831	SNORD115-13	-0.441898	IGBP1P1	0.186921			ELK4	-1.34786	RALGAPA1	-0.439	LOC101929726	0.341906	OLFML2B	0.132222			GPC3	-0.138171			TRIM52	0.0653066			APOC3	-0.0596954	MIR4664	-0.947141
SLTM	-0.22	MIR9-1	0.178	KIAA1551	0.199401			C2orf73	0.904282	GABRG1	0.480919	KRT8	-0.255661	SNORD115-7	-0.441898	HDGF	-0.0821972			KRTAP10-11	1.79708	UMOD	0.586	ZFHX3	0.25771	TTC39C	-0.268633			MRPL24	-0.0790547			BAIAP2L1	-0.0986394			PPOX	0.0248695	MIR379	-0.832362
SNCA	0.632	TSPAN1	0.116	TPTE	0.084228			FASTKD2	0.592265	IL25	0.118951	GIGYF2	-0.392167	SNORD116-22	-0.441898	CPLX4	-0.131473			COL17A1	0.800518	B4GALT2	0.859	EPHA1	0.280385	SNHG17	-0.356905			SLC7A14	-0.112219			SLC16A4	-0.104142			MAP3K7IP2	0.0247374	MDK	0.398393
COG8	0.0823	ISM1	0.136	AGAP11	-0.12245			FAM26F	-0.938961	ZRANB1	0.268393	NMT1	-0.873199	SNORD116-4	-0.441898	QPCTL	-0.0767714			CRYAB	-1.3198	SORCS3	-0.601	PDLIM1	-0.605446	C15orf52	-0.227206			FAM127A	-0.0513383			FAM214B	0.0758755			STK19	-0.0410416	RSPO3	-0.811442
GREB1	0.107	LAPTM5	0.316	STX6	-0.227501			MAP3K8	0.541304	SH3GLB2	-0.290071	DBF4	0.874357	PWARSN	-0.441898	SURF4	-0.071568			LRRC25	0.913671	FAM120A	-1.09	ZZEF1	-0.286814	JAM3	-0.501982			INTU	0.0711608			FAM69A	-0.117336			POLR2K	0.034596	DBI	0.627562
NUP62CL	0.0867	MSL3	-0.339	MGAT3	0.162599			PTPRD-AS1	-0.731784	MARCH6	0.270861	ZC3H15	0.295362	SNORD107	-0.441898	LEO1	-0.100574			NDN	-1.72088	TFR2	0.638	SMARCC2	-0.743132	ASPH	0.136823			GPX4	-0.0729584			ANK3	-0.0816677			PSME4	0.01467	linc-GAPT-2	-0.761324
ABCD4	-0.0971	RNPC3	-0.145	INPP4B	0.267905			GAR1	-0.274524	TMEM59L	-0.150152	RPL37A	-0.335526	SNURF	-0.441898	PPP1R2	-0.0818241			LOC101928191	1.00984	GSTK1	0.39	TMEM63A	-0.748179	WDR1	-0.0877434			DNAJC10	-0.0682655			ALDH2	0.122499			TBX1	0.0330321	GCNT1P2	-0.926824
RNY4	0.196	HMP19	0.201	KRTAP20-3	0.138363			SMURF1	0.621913	ZNF434	0.162938	NF1	-0.360509	SNRPN	-0.441898	MTX2	-0.0974424			MESP1	-1.53833	VAPA	0.482	MBD4	-0.504357	SCD5	0.134131			NCF2	-0.136552			CD109	0.125961			ASB6	0.0198202	KIAA0895	-0.398246
SON	-0.241	ZNF37A	-0.14	CCDC69	-0.204991			MS4A1	0.581735	PDE5A	0.175621	GABRQ	-0.222499	IPW	-0.441898	MED10	0.11953			SNX24	1.35093	NFATC4	0.876	LOC101928708	0.268139	RTCA	-0.127504			KCNK1	-0.273149			BCAN	0.139338			LRRC14	-0.0587212	SCG5	-0.529936
BRE	0.129	UNC93B1	0.377	DCT	-0.100415			RNF144A	0.60039	MPP3	0.104223	PYCARD	-0.178997	SNORD14D	-0.423919	PAF1	-0.108164			TMEM71	1.2136	LARP6	0.533	CA4	0.928615	CEP290	-0.21512			RNVU1-1	-0.156764			TMSB4Y	-0.162132			CHRM1	-0.0481771	ROCK1	0.462587
SLC4A5	-0.481	XRCC5	0.218	OR8G2	-0.130859			ZNF12	0.246422	TRIM38	0.135032	PDE4D	-0.874958	SNORD14C	-0.423919	OR8K3	0.108084			AMOTL1	-2.51826	FAM127A	0.684	REPS1	-0.638156	SRRD	-0.197493			C1QA	-0.132333			HECTD1	-0.0876372			CHORDC1	0.0561359	PTPRU	-0.457548
BAD	0.0936	COMMD4	0.29	MYZAP	0.14313			KIR2DL2	0.807633	PACSIN3	-0.684553	ZMYM2	0.393442	HSPA8	-0.423919	SARS2	-0.0802557			ZNF7	-2.12931	DCTN3	0.535	WNT6	0.319756	C5orf22	-0.171161			TRAPPC2L	-0.101266			ZCCHC7	0.0589075			NFYC	0.0392189	TMEM151B	-0.879278
ATP5EP2	0.196	TIMM23	0.19	SPATA31A7	0.174691			NUP58	0.269921	HNRNPD	0.238498	RTF1	-0.473978	HNRNPA3	-0.231096	LGMN	-0.0841312			ADAMTS8	-1.40605	YIPF2	0.557	LOC105379045	-0.645906	IFT57	-0.154992			PSMD10	-0.0797859			TAF3	0.0630651			ZNFN1A2	0.0321453	HESX1	0.690435
ANO7	0.0823	SLC30A7	-0.218	LRRC29	-0.103254			DZIP1L	0.235013	RNF183	0.11019	COX7C	0.14655	HNRNPA3P1	-0.231096	INPP5J	-0.0818273			GDAP1L1	-0.867802	ANKRD12	-0.521	NCAM1	-0.8378	XPR1	-0.219437			KIF11	0.0833247			DAOA-AS1	-0.0649203			HCRTR1	-0.0302623	linc-ARHGAP26-6	-0.452871
ZNF438	0.107	USP32	-0.0868	CLDN12	0.10309			LMAN1	0.751141	RNFT2	-0.457268	BIRC5	0.224328	WTH3DI	-0.298707	EOGT	-0.105996			UBE3C	1.59868	EGFR	-0.986	ELAVL3	0.254553	HNRNPUL2	0.28063			ARPC2	-0.068588			IL18	-0.14768			CSTF3	0.0397102	CENPF	-0.769116
PPP1R12B	-0.151	TFAP2E	0.148	SNORD3D	0.631693			SGK2	0.242981	IL7R	0.0679302	ZNF638	-0.575271	RAB6C	-0.298707	SMIM11A	-0.0955071			SIPA1L3	-1.81764	CHRNE	0.681	FBXW12	-0.586619	SSSCA1	-0.195606			TM2D3	-0.108363			ST8SIA4	-0.158019			PAX1	-0.04075	FAM87A	-0.880359
CORO2B	0.0966	DMBX1	0.124	SEPT7	-0.14254			FDPSP2	0.31499	CAP2	-0.167701	PIGQ	-0.193486	RAB6A	-0.298707	CPT1C	-0.128824			ITGA5	1.18456	SLC4A9	-0.78	SMC5-AS1	0.248739	RSF1	-0.210194			HINT2	-0.0697892			NUDT15	-0.0664572			LYNX1	-0.0574756	DLGAP1-AS2	0.512126
PARP4	0.219	ANAPC13	0.246	FAM134B	-0.227208			FAAP100	0.44187	BAI2	-0.369411	CHST4	-0.226746	MIR6785	0.223016	XRCC6	-0.0854442			MYOM3	0.701499	GPR108	0.489	MDM4	-0.63036	DBN1	-0.258912			SPOP	-0.161467			CIITA	-0.0760148			HIST1H2BE	0.0247139	CTC-297N7.7	-1.18746
PRNP	-0.227	SHROOM4	0.131	SPEG	0.130447			HRK	0.604087	SP140L	0.0779023	KDM2B	-0.599168	TMEM94	0.223016	REPS2	-0.107622			BMS1P20	-2.77345	CSTB	0.618	GLOD5	0.313936	LRRFIP1	0.202946			GLYCTK	-0.0542429			CAND1	-0.122038			NFAT5	0.0174738	CNST	-0.433376
MBNL3	0.129	FAM208B	0.0955	HTR4	-0.111559			COX11	0.248161	NHLH2	0.104128	KRT28	0.29001	LOC100652930	0.254887	TOMM40L	-0.0748992			ZMAT4	-0.607404	DCTN4	0.477	TRIM11	-0.464065	TSTD1	-0.151343			PALM	0.0697372			ZNF578	0.154446			CLCN2	0.022625	GRK7	0.626384
DEFB109P1	-0.0719	HIF1A	-0.2	ZMYND11	0.116498			CAND1	0.420258	TFAP2E	0.140799	LHX4	-0.235083	STX16-NPEPL1	0.254887	NBAS	-0.0575959			STOX2	-1.68149	RDH12	0.846	OR10H2	0.247585	HCFC2	-0.252621			CACNA2D1	-0.10585			EPHB3	-0.073241			PPP1R16B	0.0268075	ALAS1	-0.28705
CSNK1E	-0.428	ZNF223	-0.685	PHF3	-0.225705			RAB11FIP5	0.260746	SUSD1	-0.308137	BCL2L2	-0.816192	LOC102724788	0.321778	VPS9D1	-0.0802933			POTEM	0.703214	ARRB2	0.477	GGA1	-0.61701	FAM193B	-0.196048			NUBP1	-0.155092			FOXP4	0.0660598			HPGD	0.0355055	TIPRL	-0.382212
DNTTIP2	-0.225	IL17RE	-0.0977	PHB	-0.363863			HMCN1	-1.63892	TNFRSF1A	0.102622	C10orf125	-0.264993	PRODH	0.321778	OBSL1	-0.100254			TMEM106A	0.752448	TBC1D7	-0.75	DNAJC12	0.279751	LOC100287497	-0.357974			SLC38A5	-0.117417			NEMP1	0.115471			FAM111A	0.0254075	ST8SIA3	-0.808561
SPG7	-0.367	C14orf37	0.109	ERP44	-0.130639			TRIM32	-0.253155	KIAA0317	-0.362341	CEP57	-0.547509	CCL15-CCL14	0.190277	HNRNPM	-0.0744548			CTBP2	-1.90447	SLC24A4	0.686	RBM15	-0.620658	SELO	-0.358592			TSPAN5	-0.155099			ELL	0.0763156			KLHL5	0.0565606	TMEM130	-0.969296
SRGAP3	-0.0955	TPPP3	-0.13	KDM5D	-0.630104			ZNF234	-0.333987	C12orf65	0.517237	WHAMML1	-0.526861	CCL14	0.190277	ZNF154	-0.110098			C6orf132	1.61274	ANK1	0.645	CCDC18-AS1	-0.738344	CLUAP1	-0.182779			SLC9A6	-0.139186			UBE3D	0.0855432			SMAD6	0.0308119	TBRG1	-0.30802
ZNF845	-0.239	SLC6A11	-0.128	VAV3	-0.208929			RGS9BP	0.567352	MAP1LC3C	0.1202	FPR1	0.186815	TNFAIP8L2-SCNM1	0.141985	AKTIP	-0.0692747			LINC01547	-1.04262	FTL	0.422	LMO7	-0.49617	C15orf57	-0.454827			SENP2	-0.0739622			DBN1	0.0840792			CTTNBP2NL	0.0741534	RNMT	-0.296416
GCC2	-0.144	FCGR1B	0.614	PTPRE	-0.139842			MINOS1P1	0.629801	TMEM186	-0.326022	CSHL1	-0.184904	SCNM1	0.141985	EIF4EBP2	0.0789225			KANSL1L	-0.75594	WDR47	0.582	WDFY2	-0.802064	TRIOBP	0.140983			ACVR1	-0.120362			PSMA5	-0.169087			WDSUB1	0.0218972	HS6ST2	-0.561721
USP44	-0.104	ELK3	-0.124	MRPS16	-0.241482			TRPC4	0.500006	RNF135	0.117342	ZFAND3	0.502592	TGIF2-C20orf24	-0.260566	FAM131B	-0.114465			RASAL2	0.593193	CXorf26	0.62	LRBA	-0.64041	CHAC2	-0.249127			UTP4	-0.0849138			MKKS	-0.190747			SLC4A7	-0.0416921	WDR37	-0.432804
SLC25A16	-0.118	ACAD8	-0.265	SNORA50A	-0.111824			RRN3P2	0.73575	TACC3	0.0689462	BIN3	-0.226304	C20orf24	-0.260566	TMTC4	-0.17454			LINC00886	0.983911	IL16	-0.752	PTP4A2	-0.566108	SIRT1	-0.232887			BCKDHA	-0.0740597			ESYT3	0.121627			DSG4	-0.0327586	GBA2	-0.280311
PDPK1	-0.162	GNG11	0.608	UBAP2L	-0.288737			MEF2A	0.515931	TROAP	0.0895512	TNR	-0.497845	GGT2	0.20453	CBLL1	0.0993003			UBE2E1	2.09157	SLC35B1	0.564	ABL2	-0.27969	CAPRIN1	-0.173127			INTS7	-0.131849			ACAP2	0.0846404			39877	0.0235224	MCFD2P1	-0.728583
CFAP206	0.0956	SPECC1L	-0.305	SLC25A32	-0.160538			FAM129C	0.348615	ATP1B1	-0.0910392	RIMS2	-0.639171	GGTLC2	0.20453	BRMS1L	-0.135757			LOC553103	-1.17872	COL19A1	-1.5	ASPG	0.229999	LCLAT1	-0.215039			DESI1	-0.0543563			MMACHC	-0.0798392			RFXANK	-0.0288279	CCM2	-0.371251
GALC	0.205	CHST12	-0.328	EIF1AY	-1.50944			LOC105369595	0.286829	NDST1	0.520976	TRAPPC9	-0.391723	GGT1	0.20453	IFT172	-0.0829689			NCOR2	1.25951	PIWIL4	1.47	ATP5S	-0.381085	TFRC	-0.260523			TNFAIP2	-0.0473612			NALCN	-0.0898831			NAPSA	-0.0311533	FAM3B	0.730753
ZNF493	-0.212	BTNL10	-0.476	WDR20	-0.126362			EBLN3P	0.288971	SON	-0.254295	DLL4	0.207238	RAB3GAP2	-0.225152	IMPG1	0.07381			NPTXR	-0.767911	MAPKAPK2	0.399	MRPL57	-0.359909	ZNF668	-0.168252			ADAP2	-0.0606043			OR10D1P	-0.0689415			MLH1	0.017152	POC1A	-0.371592
C8orf58	0.118	TIAL1	-0.102	ZFAT-AS1	0.117952			LAMA2	-0.644996	SNTB1	0.117985	GTPBP4	-0.827108	AURKAPS1	-0.225152	GABRG2	-0.154416			CLSTN2	1.77493	TRAPPC1	0.411	DALRD3	-0.318024	SLC25A15	-0.244374			COQ2	-0.0802106			UQCC3	-0.0635981			USF1	0.0505647	CDKN2D	-0.60067
ITCH	-0.158	GNG4	-0.119	SPIN1	-0.161565			SPAG6	0.524202	HESX1	0.0994247	DSCC1	0.531136	MIR3654	0.157281	ITGB2	-0.103945			MIR181A2HG	1.30125	ACTR2	-0.8	PTCD2	-0.540182	TLR2	0.248041			KLHL13	-0.21918			C15orf39	0.0760538			DMBT1	-0.0366945	ESRRG	-0.450565
H19	-0.0867	COL12A1	-0.129	LOC105376633	-0.108228			RSPO1	1.20051	ARID5B	0.258023	MSGN1	0.175687	EEF1G	0.157281	DCTN2	-0.08542			RNF141	2.15877	KIAA0802	-0.543	RBMY3AP	0.518891	KPNA5	-0.291901			AURKAIP1	-0.0459095			OLFM2	0.133798			RAB4A	0.0800324	DYNLT3	-0.558781
SETD3	-0.126	TDO2	-0.103	LINC01120	0.114924			ADRA1A	-1.46197	SYT15	0.38828	ALDOC	-0.73065	NUS1	-0.178188	XAGE-4	0.155106			GAPDHS	-1.57464	SHMT2	0.534	RAB5A	-0.345714	ZFYVE9	0.12516			GNA12	0.0864127			CARNMT1	-0.11739			KCTD14	-0.0176997	PTPRN2	-0.710589
PLEKHF1	-0.468	CARD19	0.228	AGPAT1	0.113499			NMT2	0.427244	CDADC1	0.328424	ZNF330	-0.860442	NUS1P3	-0.178188	JTB	-0.077078			CFAP53	0.844877	SSH3	-0.565	MTMR3	0.592079	MBTPS2	-0.249797			QRSL1	-0.130669			FAM219A	0.0669362			SLAMF9	-0.0379011	linc-PDE10A-4	-0.930303
CARNS1	0.208	ZNF786	-0.484	OR2W3	0.209255			R3HDML	-0.31388	TMEM38A	-0.327358	RAB23	0.927063	LRRD1	-0.428718	AOC2	0.141184			LOC101927870	1.37497	FNTB	0.58	CIRBP	-0.303524	ATP6V0E2-AS1	-0.198427			COMMD8	-0.108612			EBI3	-0.0820861			TNKS	0.028486	SNX16	-0.380757
FOXJ3	-0.185	INO80	0.169	FADS2	-0.114141			CALN1	-0.546156	AGA	-0.66023	SNN	0.417067	CYP51A1	-0.428718	FAM71F2	0.124136			PANK2	-0.881294	TINAGL1	0.608	ACSBG1	-1.03685	AGBL3	-0.195401			RUFY3	-0.0730709			KSR2	0.11773			KRTAP4-4	-0.0738836	BTN2A2	0.53482
CHM	-0.25	CTAGE10P	0.125	DLX1	-0.147042			AGK	-0.164486	NGF	0.112682	DMTF1	-0.829937	TNFSF12-TNFSF13	0.276827	KRTAP21-2	0.121376			AXL	-0.927839	VWF	0.598	NOP10	0.272625	MED23	-0.281949			APOC1	-0.119354			MSH2	-0.147662			TINAG	-0.0586107	TEAD3	0.615013
DNAJC8	-0.195	NEK10	-0.112	MRPL15	-0.297808			P2RX2	-0.27934	KIAA1539	0.248098	TMEM56	0.948525	ST20-MTHFS	0.228406	NDST1	0.0957115			LOC340357	1.2584	SCYL1	0.399	GALNT11	-0.298429	DESI2	-0.145243			TCEAL1	-0.112647			PLPP3	0.238114			AUP1	0.0407622	STK32C	-0.58518
SOAT2	-0.0953	MCM7	-0.127	TMEM236	0.149702			DUSP1	0.675763	COL8A2	0.103254	MPPED2	1.10546	MTHFS	0.228406	FAM136A	-0.113188			SHMT1	-0.787957	CASR	0.753	NTRK3	0.354925	CNKSR2	-0.284927			MARS	-0.0929463			CASP1	-0.178117			SHRM	-0.0368136	SEC14L1	0.307354
PM20D2	-0.159	FAM135A	0.159	ATF4	0.315714			PRRC2C	0.454384	SLC9A10	0.11234	SLC8A1	0.293366	LOC101930416	-0.294521	PRKAG1	-0.0772316			MUC7	2.03123	PI15	1.1	NEFL	0.80858	TBC1D15	-0.223321			USP4	-0.113898			SASH1	0.177116			TMEM17	0.0212788	RALYL	-0.684912
PDHA1	-0.139	CASP14	-0.1	IFI27	0.396917			ERCC6	0.214244	UHRF1BP1	-0.400165	FAM78A	0.504483	LOC101929792	-0.294521	GGA1	-0.0670918			TRPC4	-0.740481	SS18L2	0.584	FAM189B	0.337813	NFASC	0.140296			NDUFB2	-0.109776			OR2V1	-0.0803575			QDPR	0.0287687	AC009948.5	-0.284824
ARFGAP3	-0.197	RHOT1	0.116	PYDC2	0.152277			TMEM47	0.40868	PAK6	-0.353718	HMG20B	0.354212	LOC100996724	-0.294521	SMCHD1	0.070125			OPCML	1.84471	ANKMY1	-0.734	RBM47	0.615011	FBXO24	0.16376			RND2	-0.0742545			LGALS3	0.111645			SPG21	0.0167822	CTD-2575K13.6	0.709794
OR6C75	0.0997	PHKA2	-0.25	SLC25A25	-0.130078			FAM86B3P	0.441425	MCTS1	-0.444412	TINF2	-0.691656	PDE4DIP	-0.294521	COQ6	-0.0799408			TSACC	1.64189	SLC22A13	0.549	GRIK1-AS2	0.369509	JADE1	-0.197395			PPCS	-0.057937			STK17A	0.11802			FKBP7	0.0402991	GTF3C6	0.364407
TAF1C	-0.176	GBA	0.155	TCEB2	0.237946			PKM	0.446523	CHCHD7	-0.32652	CAPN14	0.300016	NUDT4P1	-0.492381	ZNF800	0.0978718			GDNF	-1.90772	STXBP2	0.535	SIAE	0.209247	BBS7	-0.17729			SRSF6	-0.139649			FBXO6	-0.0702142			EXOC6	-0.0340371	SLC44A2	0.336042
ERVFRD-1	0.0664	BCL11A	-0.374	RGS4	0.0950426			ING5	-0.903737	PTGS2	0.551669	MGEA5	-0.5223	NUDT4P2	-0.492381	CCDC15	0.117413			FOLR2	1.37102	RAB2B	0.975	SYCN	0.29714	CHDH	0.134911			FUNDC1	-0.0869745			USF3	0.0699204			LRFN5	0.0445302	DUSP4	-0.657619
TMEM70	-0.133	SGCD	-0.101	DPP6	0.128155			TMEM185A	0.301893	UBXN4	0.190137	ZNF480	0.553838	NUDT4	-0.492381	SKIV2L	-0.0812589			FOXP1-IT1	2.08755	KIAA1949	0.57	ARMCX4	-0.39018	ING1	-0.191292			NDRG3	-0.135413			PSD2	0.164169			GPC5	0.0342183	RASL10A	-0.814814
POLE	-0.115	MED1	-0.142	NPSR1	-0.14801			COBLL1	1.22349	MIIP	0.153072	CWC25	-0.697155	CALM3	-0.163825	UBE2L3	-0.0523289			PARD3	1.17459	MTERFD2	-0.473	DLGAP1	0.359345	CNIH4	0.214756			ACTB	-0.0568718			CUL4A	-0.0504691			DNMBP	-0.0300819	SH3BP5-AS1	0.416309
C1QTNF9B-AS1	-0.101	MIR365A	0.135	ANKRD28	0.203051			KRTAP1-3	-1.02298	AKAP10	-0.427193	PLAGL1	0.644373	CALM2	-0.163825	MYT1L	-0.0989833			MRGPRX3	2.31609	PIP5K1B	-1.11	LINC00710	0.186014	CCR3	-0.682833			RPS6KA3	-0.161845			ZNF100	0.114888			SPRY1	0.0391315	C1orf115	-0.862547
TXN	0.252	UGP2	0.151	SLC25A33	-0.182561			LINC00598	-0.858476	KIF5C	-0.114958	GRHL2	0.204458	CALM1	-0.163825	PMS2P1	0.090282			NELL1	-1.51059	TRAF7	0.638	PEX5	0.405032	XPNPEP3	-0.197635			NOTCH2	0.14378			UBN1	0.0598111			SLC17A6	0.0185567	CMAS	-0.443357
SNORD103A	0.0908	SCYL2	-0.134	INTS6	-0.24018			MSR1	-0.63914	SRPR	-0.403632	KCNIP3	-0.648687	PLA2G4B	0.20336	ARPP19	-0.132727			CD34	-1.58312	LOXL3	0.564	BORCS5	-0.811338	COX7C	-0.190752			OLFML2B	-0.0600296			PARP3	-0.0709176			IFIT5	0.0203093	PRKCB	-0.829036
FH	-0.204	FXYD2	-0.101	AP5M1	0.153255			RAPGEF1	-0.59823	KIAA0090	-0.414484	MAFG	-0.521879	JMJD7-PLA2G4B	0.20336	HPCAL4	-0.0791805			EMX2OS	-1.48267	CDK11A	0.486	SPEN	-0.84984	CCL28	-0.21615			TMEM109	-0.129957			ARMCX3	-0.122864			ADH1A	-0.0402235	CIAPIN1	-0.338529
PGRMC1	0.352	TNFSF13	0.178	POT1	-0.0828664			FOXK2	0.302651	EPB41L5	0.15171	AP1S2	0.334475	KIAA0391	-0.224092	SPATS2L	-0.134041			XAF1	-0.629278	KIAA0195	0.598	TEX28	0.347523	AP4M1	-0.153326			NPCDR1	0.0793811			SLK	0.0651319			RPL8	0.0366622	KCNJ3	-0.706362
PRR16	0.0789	BRD7	-0.186	UBE2E2	-0.225576			PPP1R36	-0.608735	PABPC3	-0.104691	OR5H1	-0.156329	PSMA6	-0.224092	POU6F1	-0.115808			SIRPA	2.11989	NRM	0.616	SLC33A1	-0.315337	CLCC1	-0.268045			LRRIQ1	0.082921			ATF1	-0.0810703			IL9	-0.0827622	MIR1252	-1.16958
PKDREJ	-0.118	CYP11A1	0.144	ZBTB4	-0.216802			LOC101927211	0.803068	KCNB2	-0.269518	ATOX1	0.684835	SNORA29	-0.259203	SLC16A7	-0.149526			USP34	-0.997296	CRTAP	0.544	C6	0.323892	LY6G5C	-0.305907			CCT4	-0.113462			EIF2B1	-0.0756689			CLASP2	0.0382068	CD83	-0.52998
PYGO1	0.0984	SLC4A7	-0.309	IGF2R	-0.364237			HLX	0.55312	PISD	0.315969	CA8	0.626731	TCP1	-0.259203	FUT5	0.140816			HP1BP3	0.657329	HMBS	0.806	GLI3	0.320166	ANKRD9	-0.510777			CTNNAL1	0.110152			NKAIN3	0.171715			EIF1	0.0477853	MON1A	-0.401342
FAM173B	0.107	RNY4	0.247	MIR130B	-0.0876082			RC3H1	0.394565	OR6P1	0.110374	TGFBI	0.415978	PGA4	0.157688	DHRS7	-0.112669			UROS	-0.792577	MRPS16	0.39	CLEC12A	-0.990536	SLC39A13	-0.180075			MON1A	-0.0521894			RND2	-0.0864693			ZFP95	0.0209731	NTNG2	-0.35514
C1QTNF9	0.0989	MIR193A	-0.0918	GDF3	0.093113			EXD3	0.665008	PPP2R1A	-0.225802	EID1	-0.272178	PGA3	0.157688	MIR16-1	0.149092			ZNF335	-1.46493	CCDC87	0.596	RBM41	-0.706059	CFAP20	-0.155963			IL3RA	-0.118424			HINT1	-0.107187			TCTA	0.0436472	MBLAC1	-0.800693
FAAP20	-0.227	LINC00202-2	-0.449	PRM2	0.0998011			LMCD1	-0.27624	SRP14	-0.198147	ZNF571	0.749229	PGA5	0.157688	RASGRP1	-0.0905425			FGF10-AS1	-1.76906	LYRM4	0.662	CRLS1	-0.467697	TOR1AIP2	-0.158946			DAB2	-0.226499			RSRP1	-0.126958			CNOT4	0.0184555	VWF	0.656392
UBC	0.228	NAT16	0.0835	MECR	-0.0756583			NTNG2	0.699814	KIAA1267	0.356906	KCNK13	-0.148995	RNF103-CHMP3	-0.297625	FGF16	0.0833242			SPATA13	-2.65878	PLEKHA1	-1.07	PRPF40A	-0.300858	MSANTD3	-0.330777			HLA-DPB1	-0.21838			ARPC2	-0.101402			BCL11A	0.0568578	FHL3	0.396002
TPRXL	-0.0616	OPRD1	0.16	RAB23	0.148227			MDH1B	0.381996	GRXCR2	0.0842669	PEX6	-0.417838	CHMP3	-0.297625	NDUFA4	-0.0974664			PRKG1	-2.621	ATF7IP	-0.858	KLF12	-0.882996	NFYB	-0.150851			PDZD8	0.0521679			CCDC77	0.118046			FBXO28	0.0256342	AL450386.1	1.22317
DCT	-0.0774	MAP4K5	-0.185	MKRN3	0.119197			PAX7	0.652759	GPR132	0.0905367	CHST8	-0.345898	ARID4B	-0.255788	TRAPPC6B	-0.130014			ZNF696	-1.22636	ZMAT2	0.935	AK8	0.344969	PTS	-0.170819			BAIAP2L1	-0.100702			ZBTB5	0.0791336			HTR1D	-0.0514541	ABHD4	0.489504
NFKBIZ	0.408	FBLIM1	-0.108	MB21D2	0.205152			ANAPC10	0.304407	MOV10	0.137604	TOM1L2	-0.846423	RBM34	-0.255788	GNAS	-0.0413153			TBX5	-0.866715	COX11	-1.04	HBS1L	-0.377484	ZFP42	0.115298			TRPC3	-0.213983			MT1H	0.14804			KDELR2	-0.0195982	EXOSC3P1	0.591181
KLHL6	0.165	RPL27	0.134	FXYD5	0.385805			SIGMAR1	-0.432772	SDS	0.151338	C15orf57	-1.12218	SNORA70	0.174839	SPIN1	-0.0478841			KIAA1549L	-0.707265	KCNQ4	0.543	TSPEAR	0.274364	CLEC4D	0.613053			RPL10	-0.243484			KLHL36	0.0745925			ABHD6	0.0386448	IDH3B	-0.333317
SHARPIN	0.162	ZFAND2B	0.167	FABP2	-0.0954441			GRM1	0.915714	TMEM30B	0.0910921	TCF4	0.831722	RPL10	0.174839	NDUFB11	-0.0713476			LINC-PINT	1.07607	ITGAX	0.684	DDX25	0.257944	CR1L	0.163339			CDK5	-0.131098			WRAP73	-0.0648565			TM2D2	0.0241418	NMNAT3	-0.289649
HCFC1R1	0.258	CD70	0.137	CD40	0.198621			CCDC158	0.704085	TBCCD1	0.229406	TAF8	1.01035	COMMD3-BMI1	-0.298574	RLIM	0.105366			FAM63B	-0.540126	MRI1	-0.653	ALMS1	-0.620471	SEPSECS	-0.223904			NUDT15	-0.0744731			SFMBT1	-0.0727185			CHFR	-0.0195178	ARL10	-0.290873
FOSB	0.916	OR1M1	0.0824	TOR4A	-0.187389			AVPR2	0.881295	BEST4	-0.318372	MAP4	-0.9413	BMI1	-0.298574	CENPT	-0.0912891			KCNH5	1.92015	KLK1	0.853	LINS1	-0.633091	METTL26	0.131599			CIB1	0.0686141			TRAPPC5	-0.0754443			UGT1A10	-0.051743	PRR23A	0.660132
ECH1	0.154	ACTB	0.197	SQRDL	0.231246			CACNA2D4	0.297622	POMT1	-0.472123	THRAP3	-0.699297	TEN1-CDK3	0.166669	FN1	-0.333009			PPP1R12B	1.75198	ADAP1	0.45	SVIP	-0.502659	NICN1	-0.170218			LANCL1	-0.10416			ADAMTS5	-0.123575			LAP3	0.0384758	ATP2B2	-0.827136
BANP	-0.194	MIR2052	0.098	ADAMTS1	0.173969			C16orf72	0.205642	SAMD4A	0.104363	LOC284889	0.330873	CDK3	0.166669	ATG13	-0.0678512			SAMD14	-0.67035	RPS20	0.723	NSF	-0.784407	ZNF91	-0.239835			WNT2	0.0757129			RPL23A	0.0752365			ACCN4	0.027043	ACTL6B	-0.766549
ZNF527	-0.102	OR2L1P	0.113	GRK5	-0.389897			SLFNL1	0.473473	PDZD3	0.0938106	C19orf59	-0.206646	PDCL3P4	-0.20521	TAGLN3	-0.15622			LOC100507642	-0.533187	FBXW7	1.41	CTSLP8	0.424996	OR7E37P	-0.216312			CLMP	-0.277659			GLUL	0.144326			ID4	0.0278442	RP11-588K22.2	-0.396998
WBP1L	-0.146	RNF220	0.173	AKR1C2	0.13978			ERVW-1	0.465599	STYX	0.541744	RACGAP1	0.953995	PDCL3	-0.20521	STARD4	-0.151321			AGRN	-1.30726	VDAC1	0.648	MTDH	-0.656367	ULBP1	-0.153832			TADA1	-0.0847429			COG4	-0.112352			SRRM2	0.0176413	LAPTM4A	0.336287
CD33	0.28	L3MBTL4	-0.139	TCP10	-0.137665			ELMOD2	0.90286	PTPN18	0.222241	TTLL7	0.816367	IGLJ3	0.179278	COG7	-0.0825087			IL12RB1	-0.782946	ZNF544	-0.731	LOC100507494	0.242877	RAD51AP1	-0.191694			PHYHIPL	-0.0622002			BAZ2A	0.0806156			CRTAP	0.0200286	PNMA1	-0.415189
DOPEY2	-0.455	SNX17	0.279	CPSF2	0.227197			MSC-AS1	-0.961782	CHD7	-0.30117	CD160	-0.285111	IGLV1-44	0.179278	PRM2	0.080302			METTL4	0.565089	SH2D3A	-0.543	WWP1	-0.34908	SMCHD1	0.554086			SRSF8	-0.0981867			SEMA4B	0.0843119			PLA2G12B	0.0180431	MEGF8	-0.412396
ALKBH8	-0.109	RHOXF1	0.108	PLXNA4	0.118871			ITGA8	-0.624804	OR5B21	0.105986	PTGFR	0.242475	CKAP2	0.179278	RMDN3	-0.0562887			POM121L12	-1.30091	KRTDAP	0.433	CCNO	0.315748	AGFG2	-0.319267			MLC1	0.154659			HACD1	-0.102316			GPX3	-0.0640833	LINC00094	-0.450586
ALG8	-0.157	C19orf70	0.218	SNORD14A	0.375733			CASK	1.01782	FANCA	0.111382	KLHL28	0.698257	IGLV@	0.179278	GNL3L	-0.0791594			LRRC43	1.49221	ZNF154	-0.755	C1orf61	0.259968	STRBP	-0.247685			METTL4	-0.152206			AKR7A3	0.0763179			TAS2R3	-0.0202537	KIF21A	-0.318978
RBBP9	-0.212	P2RX4	0.213	KPRP	-0.081641			ARHGEF40	-0.308474	TRMU	0.135814	CDK13	0.986066	IGLC1	0.179278	SLC25A6	-0.102633			MGC34796	-1.03062	LOC153328	0.998	ZNF493	-0.59092	FDXACB1	-0.185643			DCDC5	0.0800666			NTNG2	0.071857			CYP20A1	0.040164	PET112	-0.322133
RBMS1	-0.232	DLG2	-0.131	KCNJ18	0.157192			LINC01346	0.702591	ALS2CL	0.175413	FAM129B	0.214231	MIR21	-0.283914	PAFAH1B1	-0.0627978			MYH14	-1.31162	SIDT2	0.716	BACH2	-0.503667	IL27RA	-0.237516			SDK2	0.0490294			C12orf54	0.071658			CRB3	0.0352439	FAHD1	-0.331218
[truncated: 11,683 more rows]

## Sheet: And Fold Change > |0.5|
Savitz_PBMC_Bipolar_vs_Control		Savitz_PBMC_Bipolar_Type_1_vs_Control		Savitz_PBMC_Bipolar_Type_2_vs_Control		Savitz_PBMC_Bipolar_Type_1_vs_Bipolar_Type_2		Kim_Neurons_Bipolar_Type_1_vs_Control_Time_Independent		Arion_Neurons_Bipolar_Type_1_vs_Control		Arion_Neurons_Bipolar_NOS_vs_Control		Bahn_Postmortem_Cortex_Bipolar_vs_Control		Liu_Cerebellum_Bipolar_vs_Control		Iwamoto_Prefrontal_Cortex_Bipolar_vs_Control		Matigian_Twin_Lyphocytes_Bipolar_Type_1_vs_Non_Bipolar_Twin		Witt_Blood_Bipolar_Type_1_vs_Control		Clelland_Blood_Never_Medicated_Bipolar_Type_1_vs_Control		Clelland_Blood_Bipolar_Type_1_vs_Control		De_Baumont_Frontal_Cortex_Bipolar_vs_Control		Chen_Liu_Cerebellum_and_Parietal_Cortex_Bipolar_vs_Control		Logotheti_Skin_Fibroblasts_Bipolar_Type_1_vs_Control		Chen_Parietal_Cortex_Bipolar_vs_Control		Hilscher_Lymphoblast_Fibroblast_Lithium_Treated_Bipolar_vs_Control		Abdolmaleky_Prefrontal_Cortex_Bipolar_vs_Control		Cruceanu_Anterior_Cortex_Bipolar_vs_Control		Bousman_PBMC_Bipolar_vs_Control		Vawter_Anterior_Singulate_Bipolar_Type_1_vs_Control
[truncated: 7,439 more rows]
