# Supplementary material for: Immune, RNA, and Neurocognitive Genetic Networks in Bipolar Disorder Subtypes: A Transcriptomic Meta-Analysis
Source: Research Square preprint supplement (doi:10.21203/rs.3.rs-3508951/v1), 2024-01-17
Supplement: Supplementary file 4 [file f944d319ae61b1676f0ef6f0.xlsx]

## Sheet: Full Information
Dataset	Number of samples	Biological Material	Sex	Race	Mean Age	Biological Material Source	Diagnosis	Medication	Platform
Abdolmaleky	35 BD, 35 Control	Prefrontal Cortex	Bipolar: 63% Male BD- Left /75% Male BD- Right 27% Male BD+ Left/50% Male BD+ Right Control: 88% Male Left/ 63% Male Right	Not reported.	Bipolar: 43.8 BD- Left/45.2 BD- Right 43.7 BD+ Left/48.3 BD+ Right Control: 45.6 Left/43.1 Right	Stanley Institute	DSM-4 by 2 different psychiatrists	Yes	GPL8490
Arion	19 Bipolar, 19 Control (17 Bipolar Type 1, 2 Bipolar NOS)	Dorsolateral Prefrontal Cortex	Bipolar: 9 Female/10 Male Control: 9 Female/10 Male	Bipolar: 19 White Control: 18 White/1 Black	Bipolar: 46.3 Control: 47.8	Allegheny County Office of the Medical Examiner (Pittsburgh, PA)	Diagnosis was made after autopsies where a committee of clinicians made consensus diagnosis using the DSM-4 from medical records and structured diagnostic interviews of decedents’ family. In supplementary table 1, I can find the comorbid conditions	2 No medications 9 Benzodiazepines 7 Anticonvulsants 11 Antidepressants 2 Lithium 7 Antipsychotics 11 Other medications	GPL13667
Bahn	40 Bipolar, 42 Control	Orbitofrontal Cortex, Dorsolateral Prefrontal Cortex	Bipolar: 19 Female/21 Male Control: 11 Female/31 Male	Not reported.	Bipolar: 44 Control: 45.8	Stanley Institute	DSM-4 by 2 different psychiatrists	Lithium: 11 Yes/29 No Valproate: 13 Yes/27 No Fluphenazine: Yes	GPL96
Bousman	9 Bipolar, 8 Control	PBMC	Bipolar: 2 Female/7 Male Control: 3 Female/5 Male	Bipolar: 7 White/1 Black/1 Asian Control: 5 White/ 1 Black/ 1 Hispanic/ 1 Asian	Bipolar: 42 Control: 45	UC San Diego	DSM-4 Diagnostic Interview for Genetic Studies (DIGS)	Antipsychotic: 5 Yes/4 No Mood Stabilizer: 7 Yes/2 No	GPL5175
Chen	45 BD, 50 Control	Parietal Cortex	Bipolar: 21 Female/24 Male Control: 15 Female/35 Male	Not reported	Bipolar: 44.33 Control: 44.6	Stanley Institute	DSM-4 by 2 different psychiatrists	Yes	GPL6244
Chen_Liu	82 BD, 100 Control	Cerebellum, Parietal Cortex	Bipolar: 39 Female/43 Male Control: 34 Female/66 Male	Not reported	Bipolar: 43.65 Control: 45.2	Stanley Institute	DSM-4 by 2 different psychiatrists	Yes	GPL6244
Clelland	3 Never Medicated Bipolar Type 1 Patients 26 Mediated Bipolar Type 1 Patients 25 Control	Peripheral Blood Leukocytes	All male	Never Medicated Bipolar Type 1: 2 White/1 Asian Medicated Bipolar Type 1: 21 White/4 Black/1 Hispanic Control: 15 White/7 Black/1 Hispanic/2 Asian	Never Medicated Bipolar Type 1: 33.3 Medicated Bipolar Type 1: 40.8 Control: 32.5	Bellevue Hospital Center, New York	DSM-4 Structured Clinical Interview + Brief Psychiatric Rating Scale The Schedule for Assessment of Positive Symptoms The Schedule for Assessment of Negative Symptoms Mini-Mental State Examination	3 Never Medicated 26 Mood Stabilizers Medicated: 9 Lithium 6 Divalproex 3 Gabapentin 6 Lamotrigine 1 Oxcarbazepine 1 Valproic Acid Antipsychotics: 7 None 13 Atypical Only 4 Typical Only 2 Both Antidepressants: 1 Bupropion 1 Citralopram 2 Venlafaxine 3 Fluoxetine 3 Sertaline HCl 2 Trazodone	GPL570
Cruceanu	13 BD, 13 Control	Anterior Cortex	Bipolar: 4 Female/9 Male Control: 2 Female/11 Male	Bipolar: 12 White/1 Asian Control: 13 White	Bipolar: 44 Control: 40.15	Douglas-Bell Canada Brain Bank	DSM-4 by pannel of psychatrists postmortem through medical records, police reports, or ?through patient interviews?	Lithium, valproate, carbamazepine	GPL11154
De Baumont	29 BD, 30 Controls	Frontal Cortex	Bipolar: 14 Female/15 Male Control: 7 Female/23 Male	Bipolar: 27 White/ 2 Nonwhite Control: All white	Bipolar: 44.46 Control: 44.43	Stanley Institute	DSM-4 by 2 different psychiatrists	Patients are medicated	GPL4133
Hilscher	20 BD, 22 Control	Cell lines derived from Fibroblasts, Lymphocytes	Bipolar Fibroblasts: 7 Female/3 Male Bipolar Lymphocytes: 5 Female/5 Male Control Fibroblasts: 5 Female/6 Male Control Lymphocytes: 8 Female/3 Male	Not reported, all samples were collected in Germany.	Bipolar Fibroblasts: 35.1 Bipolar Lymphocytes: 44.6 Control Fibroblasts: 34 Control Lymphocytes: 36.18	University Hospital Würzburg	2 trained psychiatrists conducted semi-strucutred clinical interviews with the patients and diagnosed under a WHO ICD-10. Young Mania Rating Scale Montgomery-Asberg Depression Scale	Cells were treated with 1 mM LiCl2 in the study. Patients were medicated with lithium, antipsychotics, antidepressants, and anticonvulsants	GPL570
Iwamoto	11 BD, 15 Control	Prefrontal Cortex	Bipolar: 3 Female/8 Male Control: 6 Female/9 Male	The race of subjects in this study is not explicitly stated. Of 15 Bipolar Disorder samples from the Stanley Institute, 14 where white and 1 was African American. 4 of these samples were removed from the study. Control: 14 White, 1 African American	Bipolar: 39 Control: 48	Stanley Institute	DSM-4 by 2 different psychiatrists	9 Medicated 2 Not medicine	GPL8300
Kim	4 Old Order Amish pedigree with high incidence of BD Type 1 4 Control	iPSCs differentiated into neuroprogenitors then neurons	Bipolar: 2 Female/2 Male Control: 2 Female/2 Male	Not explicitly stated.	Bipolar: 58.25 Control: 50.75	Lancaster County	In 1976, patients were diagnosed by 5 clinicians on the DSM-3, DSM-4, AND RDC. Then each case was blindly reevaluated at least 2 times over the next 2-3 decades.\ Then a second diagnostic panel of 3 psychiatrists did the diagnostic course of illness after the 2-3 decades	Yes	GPL570
Liu	37 BD, 50 Control	Cerebellum	Bipolar: 18 Female/19 Male Control: 19 Female/31 Male	Not reported	Bipolar: 45.27 Control: 45.8	Stanley Institute	DSM-4 by 2 different psychiatrists	Yes	GPL6244
Logotheti	10 BD Type 1, 5 controls	Skin Fibroblasts	Bipolar: 4 Female/6 Male Control: Not reported.	Not reported	Bipolar: 45 Control: 30	Karolinska University Hospital, Huddinge	DSM-4	Yes Lithium, lamotrigine, and atypical neuroleptic.	GPL10558
Matigian	3 BD Type 1, 3 Control (3 pairs of identical twins discordant for BD)	Lymphocytes	1 Male pair 2 Female pairs	Not explicitly stated.	Bipolar: 36.67 Control: 36.67	Australia Twins and Psychosis Study	DSM-4 by 2 different psychiatrists using diagnostic interview and medical records	1 Female takes Lithium and Citalopram 1 Female takes Sodium Valproate 1 Male takes Lithium and Olanzapine	GPL570
Savitz	4 BD Type 1, 4 BD Type 2, 24 Control	PBMC	Can't get numbers specific to Bipolar Disorder since the dataset is grouped as mood disorder. Mood Disorder: 32% Male, 68% Female Control: 52% Male, 48% Female	Not reported.	Mood Disorder: 35 The average age of samples from Bipolar Disorder cannot be obtained. Control: 34	University of Oklahoma	DSM-4 structured interview and unstructured interview with a psychiatrist. Study didn't separate BD from BD and MDD	No psychotropic medication for at least 3 weeks, 8 for fluoxetine. Patients were not made to stop treatment, most patients declining treatment or were never medicated	GPL10558
Vawter	9 BD 1, 11 Controls	Anterior Cingulate Cortex	Bipolar: 3 Female/6 Male Control: 0 Female/11 Male	Not stated	Bipolar Disorder: 46.22 Control: 48.45	Not specified	Not stated how diagnosis was given.	Not stated	GPL5175
Witt	11 BD Type 1 in euthymic or manic state, 10 Controls	Blood	All male	All German	Bipolar Disorder: 48.3 Control: 47.6	Germany	DSM-4 Structured Interview, Operational Criteria Checklist for Psychotic Illness, medical records, family history Young Mania Rating Scale	All BD patients take antipsychotics 4 take mood stabilizers 10 take anticonvulsants 1 takes antidepressants 5 take benzodiazepines	GPL11028
