# Supplementary material for: Immune, RNA, and Neurocognitive Genetic Networks in Bipolar Disorder Subtypes: A Transcriptomic Meta-Analysis
Source: Research Square preprint supplement (doi:10.21203/rs.3.rs-3508951/v1), 2024-01-17
Supplement: Supplementary file 5 [file fdd92a3c385cb0aedae9be27.xlsx]

## Sheet: Summary of Pathways
Arion_Neurons_Bipolar_Type_1_vs_Control_HUB_GENES	Arion_D_DEGs_Neurons_Bipolar_Type_1_vs_Control_HUB_GENES	Arion_U_DEGs_Neurons_Bipolar_Type_1_vs_Control_HUB_GENES	Arion_Neurons_Bipolar_NOS_vs_Control_HUB_GENES	Arion_D_DEGs_Neurons_Bipolar_NOS_vs_Control_HUB_GENES	Arion_U_DEGs_Neurons_Bipolar_NOS_vs_Control_HUB_GENES	Bahn_Postmortem_Cortex_Bipolar_vs_Control_HUB_GENES	Bahn_D_DEG_Postmortem_Cortex_Bipolar_vs_Control_HUB_GENES	Bahn_U_DEG_Postmortem_Cortex_Bipolar_vs_Control_HUB_GENES	Bousman_PBMC_Bipolar_vs_Control_HUB_GENES	Bousman_D_DEG_PBMC_Bipolar_vs_Control_HUB_GENES	Bousman_U_DEG_PBMC_Bipolar_vs_Control_HUB_GENES	Clelland_Blood_Never_Medicated_Bipolar_Type_1_vs_Control_HUB_GENES	Clelland_D_DEG_Blood_Never_Medicated_Bipolar_Type_1_vs_Control_HUB_GENES	Clelland_U_DEG_Blood_Never_Medicated_Bipolar_Type_1_vs_Control_HUB_GENES	Cruceanu_Anterior_Cortex_Bipolar_vs_Control_HUB_GENES	Cruceanu_D_DEG_Anterior_Cortex_Bipolar_vs_Control_HUB_GENES	Cruceanu_U_DEG_Anterior_Cortex_Bipolar_vs_Control_HUB_GENES	Hilscher_Lymphoblast_Fibroblast_Lithium_Treated_Bipolar_vs_Control_HUB_GENES	Hilscher_D_DEG_Lymphoblast_Fibroblast_Lithium_Treated_Bipolar_vs_Control_HUB_GENES	Hilscher_U_DEG_Lymphoblast_Fibroblast_Lithium_Treated_Bipolar_vs_Control_HUB_GENES	Iwamoto_Prefrontal_Cortex_Bipolar_vs_Control_HUB_GENES	Iwamoto_D_DEGs_Prefrontal_Cortex_Bipolar_vs_Control_HUB_GENES	Iwamoto_U_DEGs_Prefrontal_Cortex_Bipolar_vs_Control_HUB_GENES	Kim_Neurons_Bipolar_Type_1_vs_Control_Time_Independent_HUB_GENES	Kim_D_DEGs_Neurons_Bipolar_Type_1_vs_Control_Time_Independent_HUB_GENES	Kim_U_DEGs_Neurons_Bipolar_Type_1_vs_Control_Time_Independent_HUB_GENES	Logotheti_Skin_Fibroblasts_Bipolar_Type_1_vs_Control_HUB_GENES	Logotheti_D_DEG_Skin_Fibroblasts_Bipolar_Type_1_vs_Control_HUB_GENES	Logotheti_U_DEG_Skin_Fibroblasts_Bipolar_Type_1_vs_Control_HUB_GENES	Matigian_Twin_Lyphocytes_Bipolar_Type_1_vs_Non_Bipolar_Twin_HUB_GENES	Matigian_D_DEG_Twin_Lyphocytes_Bipolar_Type_1_vs_Non_Bipolar_Twin_HUB_GENES	Matigian_U_DEG_Twin_Lyphocytes_Bipolar_Type_1_vs_Non_Bipolar_Twin_HUB_GENES	Savitz_PBMC_Bipolar_vs_Control_HUB_GENES	Savitz_D_DEG_PBMC_Bipolar_vs_Control_HUB_GENES	Savitz_U_DEG_PBMC_Bipolar_vs_Control_HUB_GENES	Savitz_PBMC_Bipolar_Type_1_vs_Bipolar_Type_2_HUB_GENES	Savitz_D_DEG_PBMC_Bipolar_Type_1_vs_Bipolar_Type_2_HUB_GENES	Savitz_U_DEG_PBMC_Bipolar_Type_1_vs_Bipolar_Type_2_HUB_GENES	Vawter_Anterior_Singulate_Bipolar_Type_1_vs_Control_HUB_GENES	Vawter_D_DEG_Anterior_Singulate_Bipolar_Type_1_vs_Control_HUB_GENES	Vawter_U_DEG_Anterior_Singulate_Bipolar_Type_1_vs_Control_HUB_GENES	Witt_Blood_Bipolar_Type_1_vs_Control_HUB_GENES	Witt_D_DEG_Blood_Bipolar_Type_1_vs_Control_HUB_GENES	Witt_U_DEG_Blood_Bipolar_Type_1_vs_Control_HUB_GENES
POLR1B	FTSJ3	POLR1B	BRIX1	DHX32	BRIX1	SST	SST	MT1X	HIST1H3D	KRTAP26-1	BTNL3	HNRNPA1	SF1	RAC2	RPS21	SYN1	RPL36A	GAGE12F	N/A	KLRC2	IL7	SYK	INS	COL1A1	COL1A1	ITGB1	PPARG	PPARG	VAPB	FOXP3	CD163	CTLA4	BCL2L1	TNFSF14	BCL2L1	SPI1	BLZF1	DAB2	DDX3X	ADAMTS1	TSIX	CDK1	DDX27	CCNB2
WDR36	EMG1	VWA8	UTP14C	SRRM1	KRR1	TAC1	TAC1	ETNPPL	HDC	KLRG1	BTNL8	HNRNPA2B1	SRSF10	AIM2	RPL30	STXBP1	RPS29	GPR128	N/A	KLRC1	CSF2	IGHV4-38-2	KITLG	COL6A2	COL6A2	CTTN	INS	INS	TRADD	IL12RB1	MPO	ITGB5	NR4A2	ZNF223	EGR1	CREB1	DDX51	KIAA1598	ZFP42	DUSP1	XIST	CENPF	RBM19	MELK
NHP2	SNW1	PNISR	SKIV2L2	FTSJ3	KIAA0020	VSNL1	VSNL1		MS4A2	SLC45A3	HIST1H4B	HNRNPC	MBNL1	SPI1	RPL23A	SNAP25	RPS25	PSPH	N/A	GPR128	CD4	CD22	TP53	COL6A3	COL6A3	ERBB2	CACNG6	CACNA1C	SERPINA1	GATA3	CD4	KITLG	PTGS2	RAD51	JUNB	DDX51	XRN2	HIST1H3H	DUSP1	JUNB		NCAPG	NOC2L	NCAPG
GAR1	RRS1	NTRK2	GTPBP4	RTCA	UTP11L	ATP2B2	ATP2B2		HIST1H3A	MS4A14	HIST1H3D	HNRNPM	HNRNPM	PXN	RPL37A	SYT2	RPS27	GAGE12G	N/A	PSPH	INS	SPN	VCAM1	COL5A1	COL5A1	GOSR1	CATSPERD	HIF1A	SLITRK1	CTLA4	ITGAX	PPARG	FOSB	NUCKS1	TNF	CST7	MBD4	HCK	FOS	NR4A1		CCNA2	DDX31	KIF11
EMG1	GAR1	C12orf65	GNL3	GTPBP4	UTP14C	NPY	NPY		HIST1H4D	FCER1A	ANP32A	PTBP1	HNRNPA1	NLRP3	RPL38	BSN	RPL37A	EYA2	N/A		IL1RN	CD4	PECAM1	COL14A1	COL14A1	DLG4	PDE4B	TEX40	FXR1	IL2	IL18	ITGB8	GADD45B	BMP8B	FOSB	XRN2	SGK1	AIF1	JUNB	USP9X		BUB1	KIAA0020	CCNB1
LTV1	LTV1	ITGB1	WDR36	GRWD1	WDR36	GABRG2	GABRG2		HRAS	RAPGEF1	ENSP00000449026	RBM14	SFPQ	TLR6	RPL31	SYT1	RPS15A	KLRC2	N/A		VCAM1	BDNF	CSF2	COL12A1	COL12A1	GOSR2	RYR1	RYR1	LTF	CCRL2	IL2	SPP1	SNCA		PTGS2	BLZF1	MYBL1	CLEC12A	DCLRE1A	DDX3X		BUB1B	GNL3L	ASPM
FTSJ3	OPALIN	MYO6	NOP14	DDX54	TBL3	SNAP25	SNAP25		FCER1A	HRAS	HIST1H4D	SFPQ	EWSR1	NLRC4	RPS18	UNC13A	RPS21	ZNF595	N/A		IFNB1	SYP	IFNB1	COL15A1	COL15A1	DMD	CATSPER2	CACNG6	PRKACG	IL18	FCGR1A	INS	JUNB		SNCA	HLA-DRB1	ZNF394	HIST1H3F	HNRNPU	SRGN		AURKB	DDX51	KIF23
FCF1	KCNJ9	WNT5A	TBL3	SKIV2L2	NOP14	GABRA1	GABRA1		CPA3	CPA3	HIST1H3A	SRSF10	TARDBP	NOD2	RPL21	SLC17A7	RPL39	TDRD9	N/A		IL4	NGF	IFNG	COL3A1	COL3A1	LMAN1	CACNA1C	CATSPER2	S1PR1	CD4	CD34	ITGA5	EGR1		NR4A2	AIF1	CREB1	HLA-DRB1	NR4A1	FOS		MELK	DDX24	BUB1
RRS1	FCF1	GJA1	FTSJ3	GNL3	NMD3	SYT1	SYT1		HIST1H4B	MS4A2	HIST1H4E	TAF15	HNRNPA2B1	TLR8	RPS27	SYP	RPL31	KLRC1	N/A		TP53	CD68	SOCS1	COL1A2	COL1A2	COPE	TEX40	CATSPERD	UBE2K	IL7R	FOXP3	ITGA2	TNF-a		GADD45B	CCL3	KLRF1	CD300C	USP9X	HLA-DPA1		CCNB1	NSUN6	CCNA2
KCNJ9	NHP2	ISG15	KIAA0020	EPRS	RRP15	NEFL	NEFL		HIST1H4E	HDC	ENSP00000485567	TARDBP	TAF15	FCGR3A	RPS25	SYN2	RPL38	BCHE	N/A		IFNG	SST	IL4	COL5A2	COL5A2	PTK2	CACNA2D3	CACNA2D3	CXCR4	ITGAX	NCR1	ERBB2	NUCKS1		RGS1	HCK	FGFBP2	SPI1	HLA-DPA1	DCLRE1A		ASPM	DDX10	CDK1
